# 1 Rare variants contribute disproportionately to quantitative trait variation in yeast

2

3 Joshua S Bloom<sup>1,2,3,4</sup>, James Boocock<sup>1,2,3,4</sup>, Sebastian Treusch<sup>1,2,3,†</sup>, Meru J Sadhu<sup>1,2,3,4,‡</sup>, Laura  
4 Day<sup>1,2,3</sup>, Holly Oates-Barker<sup>1,2,3</sup>, Leonid Kruglyak<sup>1,2,3,4</sup>

5

6 <sup>1</sup>Department of Human Genetics; University of California, Los Angeles; Los Angeles, CA

7 <sup>2</sup>Department of Biological Chemistry; University of California, Los Angeles; Los Angeles, CA

8 <sup>3</sup>Howard Hughes Medical Institute; University of California, Los Angeles; Los Angeles, CA

9 <sup>4</sup>Institute for Quantitative and Computational Biology; University of California, Los Angeles,  
10 Los Angeles, CA

11 †Present address: Intrexon, South San Francisco, CA

12 ‡ Present address: National Human Genome Research Institute; National Institutes of Health;  
13 Bethesda, MD

14 Correspondence to:

15 [jbloom@mednet.ucla.edu](mailto:jbloom@mednet.ucla.edu) (JSB), [lkruglyak@mednet.ucla.edu](mailto:lkruglyak@mednet.ucla.edu) (LK)

16

## 17 Abstract

18 A detailed understanding of the sources of heritable variation is a central goal of modern  
19 genetics. Genome-wide association studies (GWAS) in humans<sup>1</sup> have implicated tens of  
20 thousands of DNA sequence variants in disease risk and quantitative trait variation, but these  
21 variants fail to account for the entire heritability of diseases and traits. GWAS have by design  
22 focused on common DNA sequence variants; however, recent studies underscore the likely  
23 importance of the contribution of rare variants to heritable variation<sup>2</sup>. Further, finding the genes  
24 that underlie the GWAS signals remains a major challenge. Here, we use a unique model system  
25 to disentangle the contributions of common and rare variants to a large number of quantitative  
26 traits. We generated large crosses among 16 diverse yeast strains and identified thousands of  
27 quantitative trait loci (QTLs) that explain most of the heritable variation in 38 traits. We  
28 combined our results with sequencing data for 1,011 yeast isolates<sup>3</sup> to decouple variant effect  
29 size estimation from allele frequency and showed that rare variants make a disproportionate  
30 contribution to trait variation as a consequence of their larger effect sizes. Evolutionary analyses  
31 revealed that this contribution is driven by rare variants that arose recently, that such variants are  
32 more likely to decrease fitness, and that negative selection has shaped the relationship between  
33 variant frequency and effect size. Finally, we leveraged the structure of the crosses to resolve  
34 hundreds of QTLs to single genes. These results refine our understanding of trait variation at the  
35 population level and suggest that studies of rare variants are a fertile ground for discovery of  
36 genetic effects.

## 37 Introduction

38 How variants with different population frequencies contribute to trait variation is a central  
39 question in genetics. Theoretical considerations<sup>4-8</sup> and previous results in yeast<sup>9</sup>, humans<sup>10-12</sup>,  
40 and other species<sup>13</sup> suggest that rare variants should have larger effect sizes, or, equivalently, that  
41 variants implicated in trait variation should be shifted to lower frequencies relative to all  
42 variants. Variance partitioning by allele frequency has revealed appreciable contributions of  
43 lower-frequency variants to heritability of complex traits in humans, such as prostate cancer<sup>14</sup>  
44 height<sup>2,15</sup>, and body mass index<sup>2</sup>. However, a direct comprehensive comparison of the effects of  
45 rare and common variants has been lacking in humans owing to low statistical power to map rare  
46 variants and confounding between effect size and allele frequency. Here we report a  
47 comprehensive study in yeast designed to overcome these limitations. We built a panel of  
48 approximately 14,000 segregants from crosses between 16 diverse yeast strains, mapped  
49 thousands of QTLs that account for most of the heritable variation in 38 quantitative traits, and  
50 measured the QTL effect sizes. We then estimated the allele frequencies of the underlying  
51 variants in a collection of over 1,000 sequenced yeast isolates from around the world<sup>3</sup>. Analysis  
52 of these large complementary data sets enabled us to examine the relationship between QTL  
53 effect sizes and variant frequency, characterize the genetic architecture of quantitative traits on a  
54 population scale, and improve mapping resolution, in many cases to single genes.

## 55 Results

56 To investigate the genetic basis of quantitative traits in the yeast population, we selected 16  
57 highly diverse *S. cerevisiae* strains that capture much of the known genetic diversity of this  
58 species. Specifically, they contain both alleles at 82% of biallelic SNPs and small indels  
59 observed at minor allele frequency > 5% in a collection of 1,011 *S. cerevisiae* strains<sup>3</sup>. We  
60 sequenced the 16 strains to high coverage in order to obtain a comprehensive set of genetic  
61 variants. We constructed a panel of 13,950 individual recombinant haploid yeast segregants by  
62 crossing each parental strain to two different strains and collecting an average of 872 progeny  
63 per cross (Fig. 1, Supplementary Table 1). We genotyped these segregants by highly multiplexed  
64 whole-genome sequencing, with median 2.3-fold coverage per base per individual. Genotypes  
65 were called at 298,979 genetic variants, with an average of 71,117 genetic variants segregating in  
66 a single cross. We phenotyped each segregant for 38 fitness traits in duplicate by automated  
67 growth assays and quantitative imaging (Methods). The resulting genotype-by-phenotype matrix  
68 (over half a million phenotypic measurements and 158 billion combinations of genotype and  
69 phenotype) formed the basis for all downstream analyses.

70 We used a variance components model<sup>16-18</sup> to show that, on average, additive genetic effects  
71 accounted for just over half of the total phenotypic variance, while pairwise genetic interactions  
72 accounted for 8%, approximately 1/6 as much as additive effects (Fig. 2 inset, Supplementary  
73 Fig. 1, Supplementary Table 2). We carried out QTL mapping to find the specific loci  
74 contributing additively to trait variation. We used a joint mapping approach that leverages

75 information across the entire panel of 13,950 segregants (Methods). We mapped 4,552 QTLs at a  
76 false discovery rate (FDR) of 5%, with an average of 120 (range 52-195) QTLs per trait  
77 (Supplementary Fig. 2, Supplementary Table 3). The detected QTLs explain a median of 73% of  
78 the additive heritability per trait and cross, showing that we can account for most of the genetic  
79 contribution to trait variation with specific loci (Fig. 2, Supplementary Table 2). We  
80 complemented the joint analysis with QTL mapping within each cross and found a median of 12  
81 QTLs per trait at the same FDR of 5%. The detected loci explained a median of 68% of the  
82 additive heritability (Supplementary Table 2). The joint analysis was more powerful, explaining  
83 an additional 5% of trait variance and uncovering 458 QTLs not detected within individual  
84 crosses. Consistent with the higher statistical power of the joint analysis, these additional QTLs  
85 had smaller effect sizes (median of 0.071 SD units vs 0.083 SD units; Wilcoxon rank sum test  
86  $W=1e6$ ,  $p=9e-5$ ).

87 To investigate the relationship between variant frequency and QTL effects, we focused on  
88 biallelic variants observed in our panel whose frequency could be measured in a large collection  
89 of 1,011 sequenced yeast strains. Based on their minor allele frequency (MAF) in this collection,  
90 we designated variants as rare ( $MAF < 0.01$ ) or common ( $MAF > 0.01$ ). By this definition,  
91 27.8% of biallelic variants in our study were rare. For each trait, we computed the relative  
92 fraction of variation explained by these two categories of variants in the segregant panel  
93 (Methods)<sup>15</sup>. Across all traits, the median contribution of rare variants was 51.7%, despite the  
94 fact that they constituted only 27.8% of all variants, and that a rare variant is expected to explain  
95 less variance than a common one with the same allelic effect size. These results are consistent  
96 with rare variants having larger effect sizes and making a disproportionate contribution to trait  
97 variation. Comparing different traits, we saw a wide range of the relative contribution of rare  
98 variants, from almost none for growth in the presence of copper sulfate and lithium chloride to  
99 over 75% for growth in the presence of cadmium chloride, in low pH, at high temperature, and  
100 on minimal medium (Fig. 3a, Supplementary Fig. 3, Supplementary Table 4). The results for  
101 copper sulfate and lithium chloride are consistent with GWAS for these traits in the 1,011  
102 sequenced yeast strains—these two traits had the most phenotypic variance explained by  
103 detected GWAS loci, which inherently correspond to common variants, with large contributions  
104 coming from known common copy-number variation at the *CUP* and *ENA* loci, respectively<sup>3</sup>.

105 In a complementary analysis, we investigated the relationship between the allele frequency of the  
106 lead variant at each QTL and the corresponding QTL effect size. Although the lead variant is not  
107 necessarily causal, in our study it is likely to be of similar frequency as the causal variant, and a  
108 simulation analysis showed that this approach largely preserves the relationship between  
109 frequency and effect size (Supplementary Fig. 4). Most QTLs had small effects (64% of QTLs  
110 had effects less than 0.1 SD units) and most lead variants were common (78%), consistent with  
111 previous linkage and association studies. We observed that QTLs with large effects were highly  
112 enriched for rare variants, and conversely, that rare variants were highly enriched for large effect  
113 sizes (Fig. 3b, Supplementary Fig. 5). For instance, among QTLs with an absolute effect of at

114 least 0.3 SD units, 145 of the corresponding lead variants were rare and only 90 were common.  
115 Rare variants were 6.7 times more likely to have an effect greater than 0.3 SD (Supplementary  
116 Table 3, Fisher's exact test,  $p < 2e-16$ ). Theoretical population genetics models show that for traits  
117 under negative selection, variant effect size is expected to be a decreasing function of minor  
118 allele frequency<sup>4,5</sup>. We empirically observe this relationship in our data for most of the traits  
119 examined, providing evidence that they have evolved under negative selection in the yeast  
120 population (Supplementary Fig. 6).

121 The existence of a close sister species of *S. cerevisiae*—*S. paradoxus*—allowed us to distinguish  
122 rare variants by their ancestral state. Variants that share the major allele with *S. paradoxus* are  
123 more likely to have arisen in the *S. cerevisiae* population recently than those that share the minor  
124 allele with *S. paradoxus*. We classified low-frequency variants as recent or ancient according to  
125 whether their major or minor allele was shared with *S. paradoxus*, respectively. Recently arising  
126 deleterious alleles have had less time to be purged by negative selection, and therefore recent  
127 variants are expected to have stronger effects on gene function, and hence manifest as QTLs with  
128 larger effects. Consistent with the expectation above, we observed that recent variants were 1.8  
129 times more likely than ancient variants to have an effect size greater than 0.1 SD units (Fisher's  
130 exact test  $p = 9e-5$ ) (Fig. 3c). We further examined the direction of QTL effects and found that  
131 recent variants were 1.5 times more likely to decrease fitness (Fisher's exact test  $p = 8e-3$ ).  
132 Strikingly, no ancient variant decreased fitness by more than 0.5 SD units, whereas 41 recent  
133 variants did (Fisher's exact test  $p = 7e-3$ ).

134 An understanding of trait variation at the level of molecular mechanisms requires narrowing  
135 QTLs to the underlying causal genes. Such fine-mapping is a challenge because genetic linkage  
136 causes variants across an extended region to show mapping signals of similar strength. Statistical  
137 fine-mapping aims to address this challenge by estimating the probability that each variant  
138 within a QTL region is causal based on the precise pattern of genotype-phenotype correlations<sup>19–</sup>  
139 <sup>21</sup>. Our crossing design enables us to obtain higher resolution for QTLs observed in two crosses  
140 that share a parent strain by looking for consistent inheritance patterns in both. Specifically, we  
141 focused on QTLs with effects greater than 0.14 SD units and used a Bayesian framework<sup>20</sup> to  
142 compute the posterior probability that each variant is causal (Fig. 4a). We then aggregated these  
143 probabilities to obtain causality scores for each gene in a QTL. With this approach, we resolved  
144 427 QTLs to single causal genes at an FDR of 20%. Because some QTLs have pleiotropic effects  
145 on multiple traits, this gene set contains 195 unique genes, greatly expanding the repertoire of  
146 causal genes in yeast. We searched the literature and found that 26 of the 195 genes identified  
147 here are supported by previous experimental evidence as causal for yeast trait variation<sup>21–25</sup> (Fig.  
148 4b, Supplementary Table 5). At a more stringent FDR of 5%, we found 105 unique causal genes,  
149 which included 24 of the 26 genes with experimental evidence.

150 Causal genes were highly enriched for GO terms related to the plasma membrane (45 of 522,  
151 16.5 expected,  $q = 1.8e-7$ ), metal ion transport (13 of 83, 2.6 expected,  $q = 0.0009$ ), and positive  
152 regulation of nitrogen compound biosynthesis (28 of 393, 12.5 expected,  $q = 0.0076$ )

153 (Supplementary Table 5). Strikingly, 5 of the 6 genes involved in cAMP biosynthesis were  
154 identified as causal (*IRA1*, *IRA2*, *BCY1*, *CYR1*, and *RAS1*; 0.19 expected,  $q=0.0002$ ). Additional  
155 genes in the RAS/cAMP signaling pathway were also identified as causal, including *GPR1*,  
156 which is involved in glucose sensing, *SRV2*, which binds adenylate cyclase, and *RHO3*, which  
157 encodes a RAS-like GTPase. In yeast, the RAS/cAMP pathway regulates cell cycle progression,  
158 metabolism, and stress resistance<sup>26</sup>. Variation in many of these genes influenced growth on  
159 alternative carbon sources. We hypothesize that the yeast population contains abundant  
160 functional variation in genes that regulate the switch from glucose to alternative carbon sources  
161 through the RAS/cAMP pathway.

## 162 Discussion

163 We previously used a cross between lab (BY) and vineyard strains (RM) of yeast to show that  
164 the majority of heritable phenotypic differences arise from additive genetic effects, and we were  
165 able to detect, at genome-wide significance, specific loci that together account for the majority of  
166 quantitative trait variation<sup>18,27</sup>. It has been argued that the BY lab reference strain S288c used in  
167 those and many other yeast studies is genetically and phenotypically atypical compared to other  
168 yeast isolates<sup>28</sup>. Our results here, obtained from crosses among 16 diverse strains, generalize  
169 these findings to the *S. cerevisiae* population and show that S288c is not exceptional from the  
170 standpoint of genetic variation and quantitative traits. We discovered over 4,500 quantitative trait  
171 loci (QTLs) that influence yeast growth in a wide variety of conditions. These loci likely capture  
172 the majority of common variants that segregate in *S. cerevisiae* and have appreciable phenotypic  
173 effects on growth. We were able to localize approximately 8% of the QTLs to single genes based  
174 on genetic mapping information alone. Interestingly, these genes cluster in specific functional  
175 categories and pathways, suggesting that different strains of *S. cerevisiae* may have evolved  
176 different strategies for nutrient sensing and response as a function of specializing in particular  
177 environmental niches<sup>29</sup>. In addition to the findings described here, we anticipate that our data set  
178 will be a useful resource for further dissecting the genetic basis of trait variation at the gene and  
179 variant level, and for evaluating statistical methods aimed at inferring causal genes and variants.  
180 In particular, the set of loci and genes identified here provides an ideal starting point for  
181 massively parallel editing experiments that directly test the phenotypic consequences of  
182 sequence variants<sup>30</sup>.

183  
184 By combining our results with deep population sequencing in yeast<sup>3</sup> we were able to examine the  
185 contributions of variants in different frequency classes to trait variation. We observed a broad  
186 range of genetic architectures across the traits studied here, with variation in some traits  
187 dominated by common variants, while variation in others is mostly explained by rare variants.  
188 Overall, rare variants made a disproportionate contribution to trait variation as a consequence of  
189 their larger effect sizes. A complementary mapping approach in an overlapping set of yeast  
190 isolates also revealed enrichment of rare variants with larger effect sizes (Fournier and  
191 Schacherer, personal communication). These results are consistent with the finding from GWAS

192 that common variants have small effects, as well as with linkage studies that find rare variants  
193 with large effect sizes. Our study design also revealed a substantial component of genetic  
194 variation—variants with low allele frequency and small effect size—that has been refractory to  
195 discovery in humans because both GWAS and linkage studies lack statistical power to detect this  
196 class of variants. Recent work in humans has suggested that rare variants account for a  
197 substantial fraction of heritability of complex traits and diseases<sup>2</sup>. Our study presents a more  
198 direct and fine-grained view of this component of trait variation and implies that larger sample  
199 sizes and more complete genotype information will be needed for more comprehensive studies in  
200 other systems.

201

202 Main Figures

203

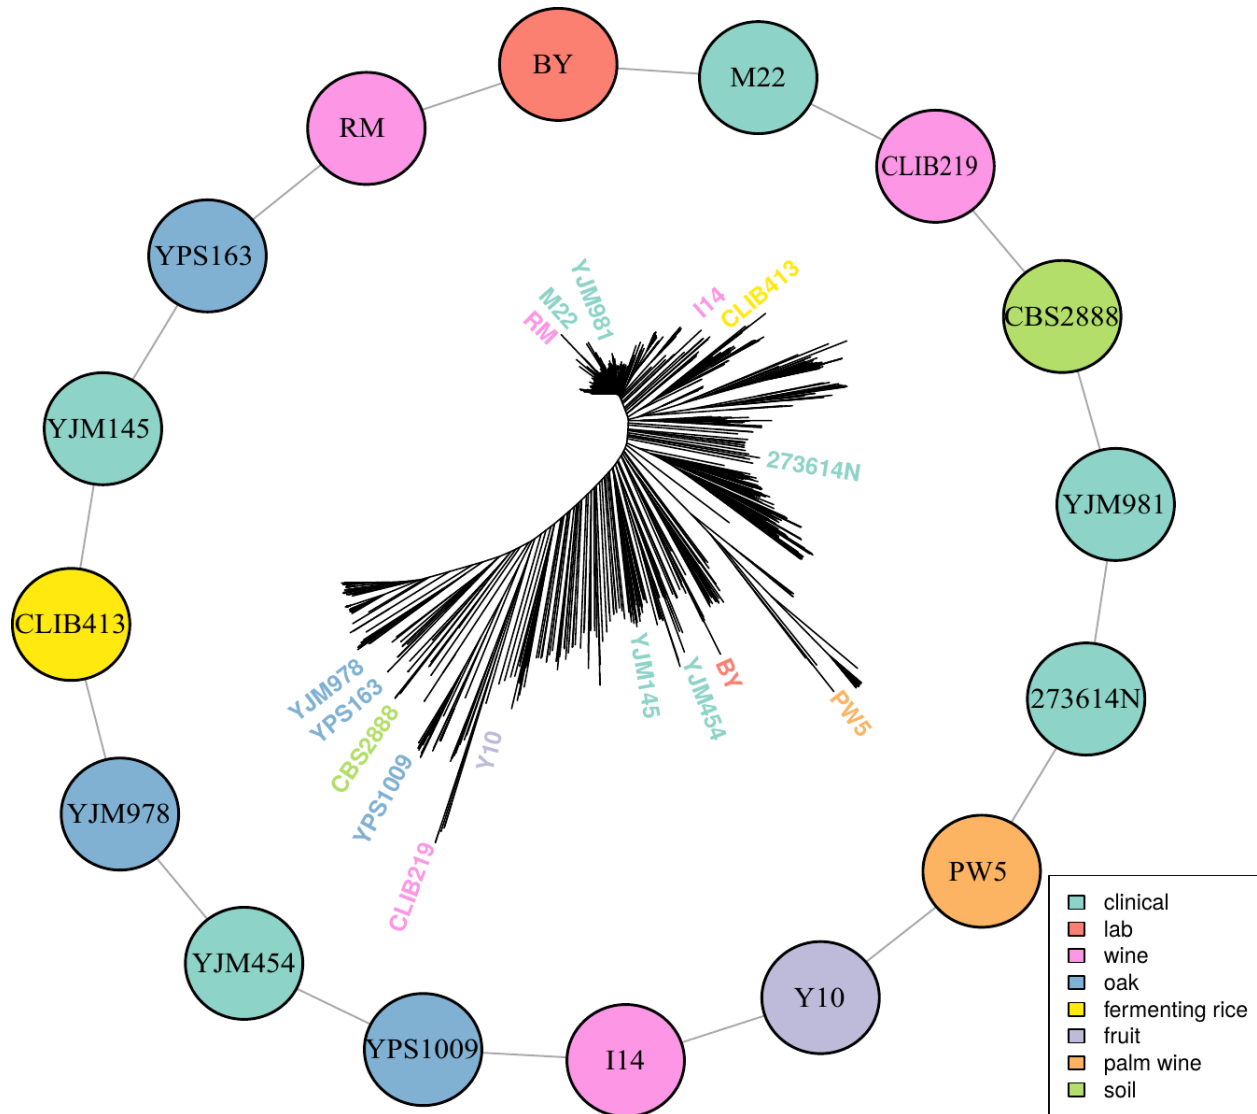

205

**Figure 1. Multiparental cross design with 16 diverse progenitor yeast strains**

206 16 parental strains were chosen to represent the diversity of the *S. cerevisiae* population, as  
207 illustrated by their positions on a neighbor-joining tree based on 1,011 sequenced isolates<sup>3</sup>.  
208 These strains were crossed in a single round-robin design, with each strain crossed to two other  
209 strains, as depicted by lines connecting the colored circles. Colors indicate the ecological origins  
210 of the parental strains.

211

212

213

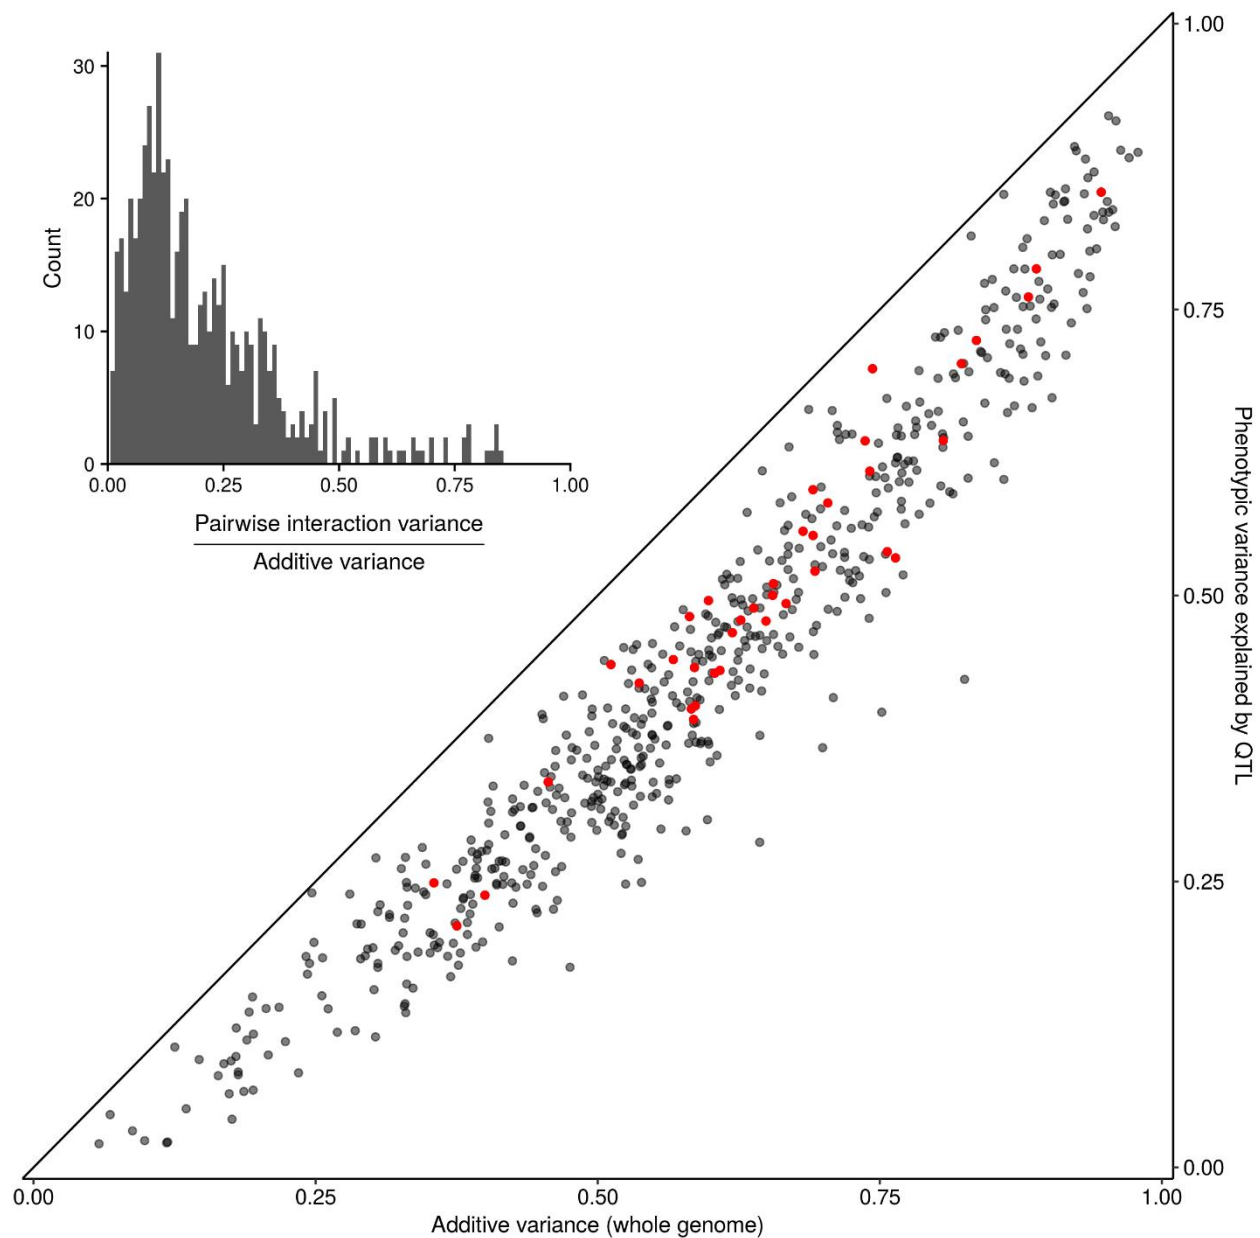

214

215 **Figure 2. Most heritable variation is explained by detected QTL**

216 Whole-genome estimates of additive genetic variance (X-axis) are plotted against cross-validated  
217 estimates of trait variance explained by detected QTLs (Y-axis) for each trait-cross combination.  
218 Red points show values for the BYxRM cross. The diagonal line corresponds to 100% of trait  
219 variance explained by detected QTL and is shown as a visual guide. (Inset) A histogram of the  
220 ratio of non-additive to additive genetic variance for each trait-cross combination estimated by a  
221 variance component model.



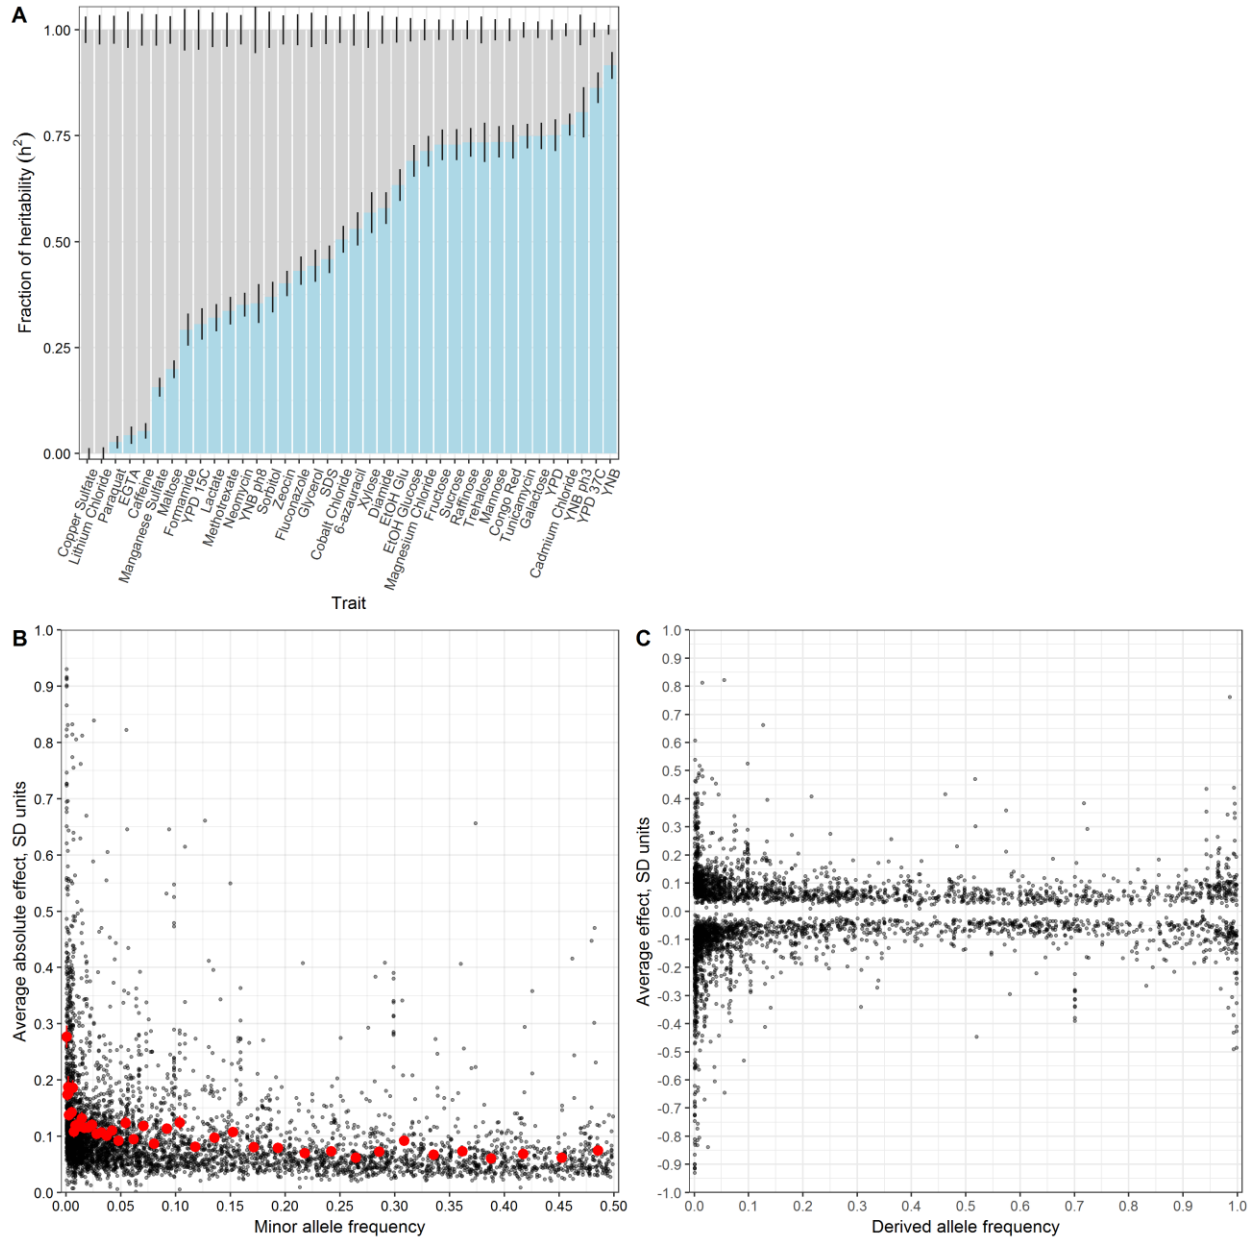

222

223

224 **Figure 3. Effect size and contribution to trait variation of rare and common variants**

225 (A) Stacked bar plots of additive genetic variance explained by rare (blue) and common (grey)  
 226 variants. Error bars show +/- s.e. (B) Minor allele frequency (X-axis) of the lead variant at each  
 227 QTL<sup>3</sup> is plotted against QTL effect size (Y-axis). Red points show mean QTL effect size for  
 228 groups of approximately 100 variants binned by allele frequency. Error bars show +/- s.e.m. (C)  
 229 Frequency of the derived allele of each QTL lead variant (X-axis), based on comparison with *S.*  
 230 *paradoxus*, is plotted against QTL effect size (Y-axis).

231

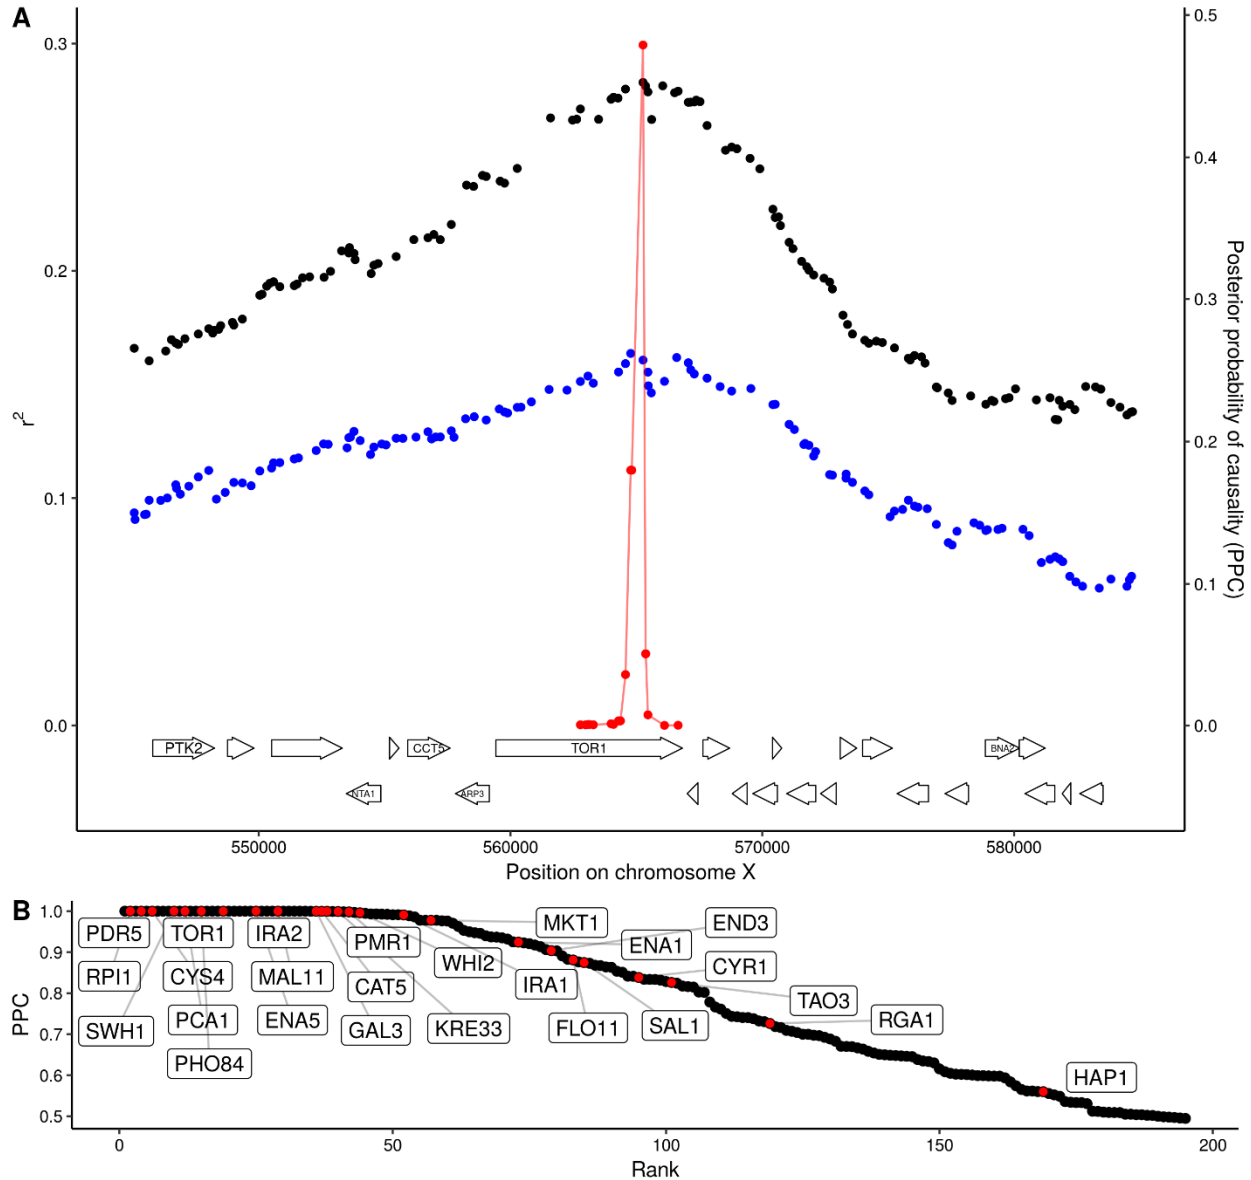

232

### 233 **Figure 4. QTL fine-mapping at gene-level resolution**

234 (A) Statistical fine-mapping of a QTL for growth in the presence of caffeine. Genetic mapping  
235 signal, shown as the coefficient of determination between genotype and phenotype (Y-axis, left),  
236 is plotted against genome position (X-axis) for crosses between 273614N and YJM981 (black)  
237 and YJM981 and CBS2888 (blue). The posterior probability of causality (PPC), plotted in red  
238 (Y-axis, right), localizes the QTL to a portion of the gene TOR1. (B) PPC is shown as black dots  
239 for 195 genes identified as causal at an FDR of 20%, sorted by PPC. Genes containing natural  
240 variants that have been experimentally validated as causal for trait variation in prior studies<sup>21–25</sup>  
241 are shown in red and labelled with gene names.

## 242 Acknowledgements

243 We thank Bogdan Pasaniuc, Frank W Albert, Olga T Schubert, Liangke Gou, Tzitziki Lemus  
244 Vergara, Matthieu Delcourt, Longhua Guo, and Eyal Ben-David for helpful manuscript feedback  
245 and edits. We thank Semyon Kruglyak, Erich Jaeger, and Illumina for performing synthetic long-  
246 read sequencing of the parental yeast strains. This work was supported by funding from the  
247 Howard Hughes Medical Institute (to LK) and NIH grant R01GM102308 (to LK).

## 248 Author contributions

249 JSB performed the experiments with assistance from ST, LD, and HOB. MS provided helpful  
250 discussions. JSB analyzed the data with assistance from JB. LK supervised the project. JSB and  
251 LK wrote the manuscript.

252

253

254

255

256

257

258

259

260

261

262

263

264

265

266

267

## 268 References

- 269 1. Visscher, P. M. *et al.* 10 Years of GWAS Discovery: Biology, Function, and Translation.  
270 *Am. J. Hum. Genet.* **101**, 5–22 (2017).
- 271 2. Wainschein, P. *et al.* Recovery of trait heritability from whole genome sequence data.  
272 *bioRxiv* 588020 (2019). doi:10.1101/588020
- 273 3. Peter, J. *et al.* Genome evolution across 1,011 *Saccharomyces cerevisiae* isolates. *Nature*  
274 **556**, 339–344 (2018).
- 275 4. Pritchard, J. K. Are Rare Variants Responsible for Susceptibility to Complex Diseases? *Am J*  
276 *Hum Genet* **69**, 124–137 (2001).
- 277 5. Eyre-Walker, A. Genetic architecture of a complex trait and its implications for fitness and  
278 genome-wide association studies. *PNAS* **107**, 1752–1756 (2010).
- 279 6. Gibson, G. Rare and Common Variants: Twenty arguments. *Nat Rev Genet* **13**, 135–145  
280 (2012).
- 281 7. Zuk, O. *et al.* Searching for missing heritability: designing rare variant association studies.  
282 *Proc. Natl. Acad. Sci. U.S.A.* **111**, E455–464 (2014).
- 283 8. Robinson, M. R., Wray, N. R. & Visscher, P. M. Explaining additional genetic variation in  
284 complex traits. *Trends Genet* **30**, 124–132 (2014).
- 285 9. Ehrenreich, I. M. *et al.* Genetic Architecture of Highly Complex Chemical Resistance Traits  
286 across Four Yeast Strains. *PLOS Genetics* **8**, e1002570 (2012).
- 287 10. Ganna, A. *et al.* Quantifying the Impact of Rare and Ultra-rare Coding Variation across the  
288 Phenotypic Spectrum. *Am. J. Hum. Genet.* **102**, 1204–1211 (2018).
- 289 11. Lek, M. *et al.* Analysis of protein-coding genetic variation in 60,706 humans. *Nature* **536**,  
290 285–291 (2016).

- 291 12. Marouli, E. *et al.* Rare and low-frequency coding variants alter human adult height. *Nature*  
292 **542**, 186–190 (2017).
- 293 13. Wallace, J. G. *et al.* Association Mapping across Numerous Traits Reveals Patterns of  
294 Functional Variation in Maize. *PLOS Genetics* **10**, e1004845 (2014).
- 295 14. Mancuso, N. *et al.* The contribution of rare variation to prostate cancer heritability. *Nat.*  
296 *Genet.* **48**, 30–35 (2016).
- 297 15. Yang, J. *et al.* Genetic variance estimation with imputed variants finds negligible missing  
298 heritability for human height and body mass index. *Nat. Genet.* **47**, 1114–1120 (2015).
- 299 16. Yang, J. *et al.* Common SNPs explain a large proportion of the heritability for human height.  
300 *Nature Genetics* **42**, 565–569 (2010).
- 301 17. Campos, G. de los, Sorensen, D. & Gianola, D. Genomic Heritability: What Is It? *PLOS*  
302 *Genetics* **11**, e1005048 (2015).
- 303 18. Bloom, J. S. *et al.* Genetic interactions contribute less than additive effects to quantitative  
304 trait variation in yeast. *Nature Communications* **6**, ncomms9712 (2015).
- 305 19. Pasaniuc, B. & Price, A. L. Dissecting the genetics of complex traits using summary  
306 association statistics. *Nat Rev Genet* **18**, 117–127 (2017).
- 307 20. Farh, K. K.-H. *et al.* Genetic and epigenetic fine mapping of causal autoimmune disease  
308 variants. *Nature* **518**, 337–343 (2015).
- 309 21. Treusch, S., Albert, F. W., Bloom, J. S., Kotenko, I. E. & Kruglyak, L. Genetic Mapping of  
310 MAPK-Mediated Complex Traits Across *S. cerevisiae*. *PLOS Genetics* **11**, e1004913 (2015).
- 311 22. Fay, J. C. The molecular basis of phenotypic variation in yeast. *Curr. Opin. Genet. Dev.* **23**,  
312 672–677 (2013).

- 313 23. Wang, X. & Kruglyak, L. Genetic Basis of Haloperidol Resistance in *Saccharomyces*  
314 *cerevisiae* Is Complex and Dose Dependent. *PLOS Genetics* **10**, e1004894 (2014).
- 315 24. Jerison, E. R. *et al.* Genetic variation in adaptability and pleiotropy in budding yeast. *Elife* **6**,  
316 (2017).
- 317 25. Sadhu, M. J., Bloom, J. S., Day, L. & Kruglyak, L. CRISPR-directed mitotic recombination  
318 enables genetic mapping without crosses. *Science* **352**, 1113–1116 (2016).
- 319 26. Tisi, R., Belotti, F. & Martegani, E. Yeast as a Model for Ras Signalling. in *Ras Signaling:*  
320 *Methods and Protocols* (eds. Trabalzini, L. & Retta, S. F.) 359–390 (Humana Press, 2014).  
321 doi:10.1007/978-1-62703-791-4\_23
- 322 27. Bloom, J. S., Ehrenreich, I. M., Loo, W. T., Lite, T.-L. V. & Kruglyak, L. Finding the  
323 sources of missing heritability in a yeast cross. *Nature* **494**, 234–237 (2013).
- 324 28. Warringer, J. *et al.* Trait Variation in Yeast Is Defined by Population History. *PLOS*  
325 *Genetics* **7**, e1002111 (2011).
- 326 29. Chantranupong, L., Wolfson, R. L. & Sabatini, D. M. Nutrient Sensing Mechanisms Across  
327 Evolution. *Cell* **161**, 67–83 (2015).
- 328 30. Shendure, J. & Fields, S. Massively Parallel Genetics. *Genetics* **203**, 617–619 (2016).  
329
