# Supplementary material for: Rare variants contribute disproportionately to quantitative trait variation in yeast
Source: bioRxiv preprint, doi:10.1101/607291, version 1 (2019-04-15)
Supplement: Supplementary Table 5 [file 607291_file07.xls]

## Sheet: Causal_Genes
Causal Genes Identified for each trait																	Information for pair QTL that share a parent; QTL1																									Information for pair QTL that share a parent; QTL2
trait	ORF	NAME	chr	start	end	width	strand	pCausalSum Gene	shared.parent	effect	localFDR	jointmaxPPC	whichjointmaxPPC				p	q	LOD	pmarker	CI.l	CI.r	sig_covar	CI.l.1	CI.r.1	betas	vexp	chr	p.1	bootstrap_interval	cross	large_effect	CI95.seqnames	CI95.start	CI95.end	CI95.width	CI95.strand	matched	maxPPC	whichmaxPPC	trait.1	p.2	q.1	LOD.1	pmarker.1	CI.l.2	CI.r.2	sig_covar.1	CI.l.1.1
Cadmium_Chloride;75uM;2	YBR295W	PCA1	chrII	792331	796647	4317	+	1	YJM454a	increase	0	0.912485	chrII_793867_C_G				0.0001	0.000100005	14.9505	chrII_792152_T_C_6570	chrII_778890_G_C,A_6486	chrII_795923_T_C_6599	chrII_792152_T_C	chrII_778890_G_C,A	chrII_795923_T_C	-0.173539	0.0319638	chrII	3.92009e-17	chrII_783892_C_T chrII_786528_G_T chrII_797653_G_A chrII_798747_G_T	3008	TRUE	chrII	787271	808935	21665	*	FALSE	0.0862445	chrII_792152_T_C	Cadmium_Chloride;75uM;2	0.0001	0.000100005	477.894	chrII_793867_C_G_5055	chrII_792352_G_GAT_5036	chrII_793867_C_G_5055	chrII_793867_C_G	chrII_792352_G_GAT
6-azauracil;50ug/mL;3	YOL152W	FRE7	chrXV	38077	43151	5075	+	1	Y10x	decrease	0	0.2	chrXV_40513_G_A				0.0001	0.000100005	27.5401	chrXV_41720_G_A_60661	chrXV_39595_A_G_60643	chrXV_41957_A_G_60664	chrXV_41720_G_A	chrXV_39595_A_G	chrXV_41957_A_G	-0.292534	0.0930424	chrXV	6.40642e-29	chrXV_39472_G_A chrXV_40306_T_C chrXV_42219_A_C,G chrXV_42247_GGA_CGA,G	3000	TRUE	chrXV	39873	42278	2406	*	FALSE	0.255495	chrXV_41720_G_A	6-azauracil;50ug/mL;3	0.0001	0.000100005	24.2619	chrXV_46390_C_T_79710	chrXV_37545_G_A_79144	chrXV_46819_T_C_79752	chrXV_46390_C_T	chrXV_37545_G_A
6-azauracil;50ug/mL;3	YOR128C	ADE2	chrXV	564334	566533	2200	-	1	CLIB219x	decrease	0	1	chrXV_565236_A_G				0.0001	0.000100005	156.738	chrXV_565236_A_G_67534	chrXV_564154_C_G_67527	chrXV_565236_A_G_67534	chrXV_565236_A_G	chrXV_564154_C_G	chrXV_565236_A_G	-0.706345	0.461398	chrXV	2.1942e-157	chrXV_564154_C_G chrXV_564229_G_A chrXV_565236_A_G chrXV_565236_A_G	3043	TRUE	chrXV	564154	565236	1083	*	FALSE	0.706587	chrXV_565236_A_G	6-azauracil;50ug/mL;3	0.0001	0.000100005	287.127	chrXV_565236_A_G_80089	chrXV_565236_A_G_80089	chrXV_566820_A_T_80103	chrXV_565236_A_G	chrXV_565236_A_G
Cadmium_Chloride;75uM;2	YBR296C	PHO89	chrII	796648	799321	2674	-	1	PW5a	increase	0	0.972763	chrII_798463_A_G				0.0001	0.000100005	7.73037	chrII_778438_T_C_8817	chrII_775233_G_A_8793	chrII_797999_T_C_9523	chrII_778438_T_C	chrII_775233_G_A	chrII_797999_T_C	-0.215133	0.0443465	chrII	2.82975e-09	chrII_767690_A_T chrII_772498_C_T chrII_798079_T_C chrII_798487_A_T	3001	TRUE	chrII	774286	798502	24217	*	FALSE	0.0156919	chrII_778438_T_C	Cadmium_Chloride;75uM;2	0.0001	0.000100005	444.531	chrII_798463_A_G_7937	chrII_798463_A_G_7937	chrII_798463_A_G_7937	chrII_798463_A_G	chrII_798463_A_G
Caffeine;15mM;2	YDR208W	MSS4	chrIV	867873	870798	2926	+	1	Y10x	decrease	0	0.361075	chrIV_869369_C_T				0.0001	0.000100005	143.55	chrIV_869558_C_T_18328	chrIV_869369_C_T_18326	chrIV_869558_C_T_18328	chrIV_869558_C_T	chrIV_869369_C_T	chrIV_869558_C_T	-0.72486	0.529934	chrIV	6.64928e-144	chrIV_869369_C_T chrIV_869369_C_T chrIV_869558_C_T chrIV_869558_C_T	3001	TRUE	chrIV	869369	869558	190	*	FALSE	0.836066	chrIV_869558_C_T	Caffeine;15mM;2	0.0001	0.000100005	200.285	chrIV_869369_C_T_13248	chrIV_869369_C_T_13248	chrIV_869407_G_T_13249	chrIV_869369_C_T	chrIV_869369_C_T
Caffeine;15mM;2	YJR066W	TOR1	chrX	559287	566922	7636	+	1	YJM981x	decrease	0	0.478992	chrX_565262_T_C				0.0001	0.000100005	61.4753	chrX_564773_T_C_43781	chrX_564773_T_C_43781	chrX_566656_A_G_43793	chrX_564773_T_C	chrX_564773_T_C	chrX_566656_A_G	-0.417597	0.163676	chrX	4.08231e-64	chrX_562775_G_A chrX_563075_T_C chrX_565457_T_C chrX_566600_G_C	3004	TRUE	chrX	562775	565457	2683	*	FALSE	0.256153	chrX_564773_T_C	Caffeine;15mM;2	0.0001	0.000100005	108.787	chrX_565262_T_C_21103	chrX_565262_T_C_21103	chrX_565373_T_C_21105	chrX_565262_T_C	chrX_565262_T_C
Caffeine;15mM;2	YOR162C	YRR1	chrXV	639413	642365	2953	-	1	YJM145x	increase	0	0.982249	chrXV_639669_A_G				0.0001	0.000100005	32.6597	chrXV_639610_T_G_47484	chrXV_639445_G_A_47483	chrXV_639669_A_G_47485	chrXV_639610_T_G	chrXV_639445_G_A	chrXV_639669_A_G	0.471577	0.0667377	chrXV	3.13977e-36	chrXV_639445_G_A chrXV_639445_G_A chrXV_639862_T_C chrXV_639975_C_T	377	TRUE	chrXV	639445	639669	225	*	FALSE	0.428349	chrXV_639610_T_G	Caffeine;15mM;2	0.0001	0.000125009	29.7677	chrXV_639758_G_A_61842	chrXV_639120_T_C_61830	chrXV_639758_G_A_61842	chrXV_639758_G_A	chrXV_639120_T_C
Cobalt_Chloride;2mM;2	YFR007W	YFH7	chrVI	158525	160446	1922	+	1	YPS1009x	decrease	0	0.858316	chrVI_159264_A_T				0.0001	0.000100005	13.6893	chrVI_161250_T_A_26603	chrVI_159212_G_GA_26590	chrVI_161261_G_T_26604	chrVI_161250_T_A	chrVI_159212_G_GA	chrVI_161261_G_T	-0.163779	0.0235144	chrVI	8.76456e-15	chrVI_161044_G_C chrVI_161152_T_C chrVI_161261_G_T chrVI_161261_G_T	2999	TRUE	chrVI	135985	161261	25277	*	FALSE	0.374696	chrVI_161250_T_A	Cobalt_Chloride;2mM;2	0.0001	0.000100005	15.5102	chrVI_159264_A_T_23141	chrVI_157884_T_A_23113	chrVI_159264_A_T_23141	chrVI_159264_A_T	chrVI_157884_T_A
Congo_Red;75ug/mL;3	YPL091W	GLR1	chrXVI	375335	377121	1787	+	1	YJM981x	increase	0	1	chrXVI_376683_A_G				0.0001	0.000100005	27.5396	chrXVI_373674_G_A_36476	chrXVI_373674_G_A_36476	chrXVI_374422_C_T_36482	chrXVI_373674_G_A	chrXVI_373674_G_A	chrXVI_374422_C_T	0.434033	0.0797872	chrXVI	5.53193e-30	chrXVI_373674_G_A chrXVI_373674_G_A chrXVI_374156_G_T chrXVI_376683_A_G	3003	TRUE	chrXVI	373674	374282	609	*	FALSE	0.226032	chrXVI_373674_G_A	Congo_Red;75ug/mL;3	0.0001	0.000100005	36.9794	chrXVI_375375_T_A_74490	chrXVI_373834_C_T_74485	chrXVI_378794_G_A_74513	chrXVI_375375_T_A	chrXVI_373834_C_T
EGTA;5mM;3	YOL115W	PAP2	chrXV	101216	103272	2057	+	1	YJM145x	decrease	0	0.5	chrXV_101333_GA_G,GAA				0.0001	0.000100005	16.1332	chrXV_90508_A_T_58081	chrXV_80539_T_C_57984	chrXV_92656_G_C_58117	chrXV_90508_A_T	chrXV_80539_T_C	chrXV_92656_G_C	0.191047	0.0288544	chrXV	3.17373e-19	chrXV_79622_AG_A chrXV_83321_G_A chrXV_97610_G_A chrXV_100316_A_G	B	TRUE	chrXV	67090	106151	39062	*	FALSE	0.0330907	chrXV_90508_A_T	EGTA;5mM;3	0.0001	0.000100005	34.5416	chrXV_104098_G_A_44872	chrXV_104098_G_A_44872	chrXV_104119_A_G_44873	chrXV_104098_G_A	chrXV_104098_G_A
EtOH_Glucose;;1	YIL119C	RPI1	chrIX	136381	138813	2433	-	1	YJM454a	decrease	0	0.407524	chrIX_137062_A_G				0.0001	0.000100005	41.7231	chrIX_141212_T_C_26348	chrIX_134734_A_G_26314	chrIX_141727_T_C_26353	chrIX_141212_T_C	chrIX_134734_A_G	chrIX_141727_T_C	0.34062	0.102808	chrIX	6.4342e-43	chrIX_140602_C_T chrIX_140602_C_T chrIX_142618_G_T chrIX_142765_T_C	381	TRUE	chrIX	133368	143458	10091	*	FALSE	0.310597	chrIX_141212_T_C	EtOH_Glucose;;1	0.0001	0.000100005	70.8735	chrIX_137062_A_G_35858	chrIX_137062_A_G_35858	chrIX_139732_C_T_35892	chrIX_137062_A_G	chrIX_137062_A_G
EtOH_Glucose;;1	YPL091W	GLR1	chrXVI	375335	377121	1787	+	1	YJM981x	increase	0	1	chrXVI_376683_A_G				0.0019	0.000460365	13.0683	chrXVI_373674_G_A_36476	chrXVI_373674_G_A_36476	chrXVI_374422_C_T_36482	chrXVI_373674_G_A	chrXVI_373674_G_A	chrXVI_374422_C_T	0.300208	0.0392811	chrXVI	3.91404e-15	chrXVI_373674_G_A chrXVI_373674_G_A chrXVI_376683_A_G chrXVI_376683_A_G	3003	TRUE	chrXVI	373674	374282	609	*	FALSE	0.186572	chrXVI_373674_G_A	EtOH_Glucose;;1	0.0001	0.000100005	30.2425	chrXVI_375375_T_A_74490	chrXVI_375375_T_A_74490	chrXVI_375693_G_A_74493	chrXVI_375375_T_A	chrXVI_375375_T_A
Fluconazole;100uM;2	YBL005W	PDR3	chrII	217165	220864	3700	+	1	CBS2888a	decrease	0	0.498626	chrII_219120_T_A				0.0001	0.000100005	148.375	chrII_219282_A_G_3307	chrII_218672_C_T_3298	chrII_219410_C_T_3309	chrII_219282_A_G	chrII_218672_C_T	chrII_219410_C_T	0.660842	0.458696	chrII	8.111e-147	chrII_219120_T_A chrII_219120_T_A chrII_219410_C_T chrII_219506_A_G	3004	TRUE	chrII	219120	219506	387	*	FALSE	0.36766	chrII_219282_A_G	Fluconazole;100uM;2	0.0001	0.000100005	454.145	chrII_219120_T_A_3367	chrII_219120_T_A_3367	chrII_219197_T_C_3368	chrII_219120_T_A	chrII_219120_T_A
Formamide;2%;2	YGR155W	CYS4	chrVII	798205	800305	2101	+	1	M22	decrease	0	1	chrVII_798910_T_A				0.0001	0.000100005	53.3625	chrVII_798910_T_A_18604	chrVII_798910_T_A_18604	chrVII_799613_G_A_18608	chrVII_798910_T_A	chrVII_798910_T_A	chrVII_799613_G_A	-0.424979	0.204173	chrVII	4.72702e-54	chrVII_798910_T_A chrVII_798910_T_A chrVII_798910_T_A chrVII_798910_T_A	375	TRUE	chrVII	798910	798910	1	*	FALSE	0.959223	chrVII_798910_T_A	Formamide;2%;2	0.0001	0.000100005	75.3569	chrVII_798910_T_A_34982	chrVII_798565_C_T_34979	chrVII_799595_A_G_34985	chrVII_798910_T_A	chrVII_798565_C_T
Fructose;;1	YOR128C	ADE2	chrXV	564334	566533	2200	-	1	CLIB219x	decrease	0	0.999974	chrXV_565236_A_G				0.0001	0.000100005	398.032	chrXV_565236_A_G_80089	chrXV_565236_A_G_80089	chrXV_566820_A_T_80103	chrXV_565236_A_G	chrXV_565236_A_G	chrXV_566820_A_T	0.758836	0.704561	chrXV	4.20983e-92	chrXV_565236_A_G chrXV_565236_A_G chrXV_566265_C_T chrXV_566265_C_T	3028	TRUE	chrXV	565236	566695	1460	*	FALSE	0.0665668	chrXV_565236_A_G	Fructose;;1	0.0001	0.000100005	395.933	chrXV_565236_A_G_67534	chrXV_565236_A_G_67534	chrXV_565236_A_G_67534	chrXV_565236_A_G	chrXV_565236_A_G
Galactose;;1	YLR081W	GAL2	chrXII	289731	292164	2434	+	1	YJM145x	decrease	0	0.999467	chrXII_291383_G_A				0.0001	0.000100005	102.058	chrXII_291383_G_A_33238	chrXII_291383_G_A_33238	chrXII_292153_G_GA,GAA_33239	chrXII_291383_G_A	chrXII_291383_G_A	chrXII_292153_G_GA,GAA	-0.607404	0.346529	chrXII	5.39187e-103	chrXII_291383_G_A chrXII_291383_G_A chrXII_292153_G_GA,GAA chrXII_292153_G_GA,GAA	377	TRUE	chrXII	291383	291383	1	*	FALSE	0.790826	chrXII_291383_G_A	Galactose;;1	0.0001	0.000100005	261.546	chrXII_290736_A_G_43800	chrXII_290736_A_G_43800	chrXII_291461_G_A_43802	chrXII_290736_A_G	chrXII_290736_A_G
Lactate;;1	YPL183C	RTT10	chrXVI	199435	202920	3486	-	1	CLIB219x	decrease	0	0.626932	chrXVI_202791_C_T				0.0001	0.000100005	22.9994	chrXVI_202791_C_T_85249	chrXVI_202791_C_T_85249	chrXVI_207460_C_T_85268	chrXVI_202791_C_T	chrXVI_202791_C_T	chrXVI_207460_C_T	0.203167	0.0371323	chrXVI	6.86328e-27	chrXVI_202708_T_C chrXVI_202791_C_T chrXVI_202819_T_C chrXVI_202889_A_G	3028	TRUE	chrXVI	202791	202791	1	*	FALSE	0.610753	chrXVI_202791_C_T	Lactate;;1	0.0001	0.000100005	27.2625	chrXVI_208615_A_G_71829	chrXVI_197059_C_T_71766	chrXVI_211066_G_A_71852	chrXVI_208615_A_G	chrXVI_197059_C_T
Lithium_Chloride;100mM;2	YDR034C	LYS14	chrIV	509423	513075	3653	-	1	I14a	increase	0	0.274386	chrIV_511948_A_C				0.2927	0.0541667	21.1148	chrIV_512878_C_T_11322	chrIV_511483_C_T_11295	chrIV_512878_C_T_11322	chrIV_512878_C_T	chrIV_511483_C_T	chrIV_512878_C_T	-0.233908	0.0234981	chrIV	4.9723e-05	chrIV_511948_A_C chrIV_512707_A_C chrIV_512908_C_T chrIV_513059_A_T	3000	TRUE	chrIV	510735	527216	16482	*	FALSE	0.112301	chrIV_512878_C_T	Lithium_Chloride;100mM;2	0.0001	0.000100005	331.554	chrIV_511717_C_A_13560	chrIV_511717_C_A_13560	chrIV_511948_A_C_13563	chrIV_511717_C_A	chrIV_511717_C_A
Lithium_Chloride;100mM;2	YDR038C	ENA5	chrIV	527318	531001	3684	-	1	BYa	increase	0	0.496418	chrIV_527743_A_G				0.0001	0.000100005	160.821	chrIV_527530_A_C_8652	chrIV_527530_A_C_8652	chrIV_527851_A_G_8655	chrIV_527530_A_C	chrIV_527530_A_C	chrIV_527851_A_G	-0.582392	0.324982	chrIV	3.85787e-161	chrIV_527319_C_G chrIV_527530_A_C chrIV_527530_A_C chrIV_527530_A_C	375	TRUE	chrIV	527530	527797	268	*	FALSE	0.249101	chrIV_527530_A_C	Lithium_Chloride;100mM;2	0.0001	0.000100005	256.488	chrIV_527319_C_G_8628	chrIV_527319_C_G_8628	chrIV_530731_NA_DEL_8641	chrIV_527319_C_G	chrIV_527319_C_G
Lithium_Chloride;100mM;2	YGR250C	RIE1	chrVII	990297	994579	4283	-	1	YJM145x	increase	0	0.442502	chrVII_991897_A_G				0.0001	0.000100005	21.0198	chrVII_992385_C_T_20058	chrVII_991617_G_A_20048	chrVII_993021_C_A_20063	chrVII_992385_C_T	chrVII_991617_G_A	chrVII_993021_C_A	0.239471	0.0303284	chrVII	1.33138e-23	chrVII_991317_T_G chrVII_991590_T_A chrVII_994602_C_CA chrVII_994715_A_G	377	TRUE	chrVII	991027	993196	2170	*	FALSE	0.276873	chrVII_992385_C_T	Lithium_Chloride;100mM;2	0.0001	0.000100005	50.3122	chrVII_991897_A_G_28691	chrVII_987992_T_C_28640	chrVII_991971_C_T_28692	chrVII_991897_A_G	chrVII_987992_T_C
Magnesium_Chloride;;1	YPL091W	GLR1	chrXVI	375335	377121	1787	+	1	YJM981x	increase	0	1	chrXVI_376683_A_G				0.0001	0.000100005	24.3526	chrXVI_373674_G_A_36476	chrXVI_373674_G_A_36476	chrXVI_374422_C_T_36482	chrXVI_373674_G_A	chrXVI_373674_G_A	chrXVI_374422_C_T	0.401976	0.086665	chrXVI	1.06973e-27	chrXVI_373674_G_A chrXVI_373674_G_A chrXVI_374156_G_T chrXVI_376683_A_G	3003	TRUE	chrXVI	373674	374282	609	*	FALSE	0.216234	chrXVI_373674_G_A	Magnesium_Chloride;;1	0.0001	0.000100005	40.4714	chrXVI_375375_T_A_74490	chrXVI_375375_T_A_74490	chrXVI_376027_G_A_74494	chrXVI_375375_T_A	chrXVI_375375_T_A
Maltose;;1	YGR289C	MAL11	chrVII	1072838	1075812	2975	-	1	RMx	increase	0	0.474838	chrVII_1074816_AC_A				0.0001	0.000100005	143.252	chrVII_1067115_CA_C_19713	chrVII_1067115_CA_C_19713	chrVII_1083575_G_A_19901	chrVII_1067115_CA_C	chrVII_1067115_CA_C	chrVII_1083575_G_A	0.589174	0.325404	chrVII	6.81585e-144	chrVII_1066693_A_G chrVII_1066693_A_G chrVII_1067118_A_T chrVII_1067118_A_T	A	TRUE	chrVII	1067115	1083575	16461	*	FALSE	0.00531398	chrVII_1074995_G_A	Maltose;;1	0.0001	0.000100005	182.021	chrVII_1074816_AC_A_33606	chrVII_1074816_AC_A_33606	chrVII_1074995_G_A_33608	chrVII_1074816_AC_A	chrVII_1074816_AC_A
Maltose;;1	YGR287C	IMA1	chrVII	1066081	1069641	3561	-	1	YPS1009x	decrease	0	1	chrVII_1068560_G_A				0.0001	0.000100005	281.595	chrVII_1067411_G_A_35733	chrVII_1067411_G_A_35733	chrVII_1084074_G_A_35916	chrVII_1067411_G_A	chrVII_1067411_G_A	chrVII_1084074_G_A	-0.843118	0.704431	chrVII	5.79649e-281	chrVII_1067171_C_A chrVII_1067411_G_A chrVII_1067452_C_T chrVII_1067452_C_T	2999	TRUE	chrVII	1067411	1083888	16478	*	FALSE	0.00544945	chrVII_1071174_A_G	Maltose;;1	0.0001	0.000100005	337.966	chrVII_1068422_T_C_30897	chrVII_1068422_T_C_30897	chrVII_1068422_T_C_30897	chrVII_1068422_T_C	chrVII_1068422_T_C
Manganese_Sulfate;;1	YOL028C	YAP7	chrXV	270526	271685	1160	-	1	CLIB413a	decrease	0	0.830904	chrXV_270656_C_CT,T				0.0001	0.000100005	39.7807	chrXV_270526_C_G_67869	chrXV_270103_T_C_67866	chrXV_271045_T_C_67873	chrXV_270526_C_G	chrXV_270103_T_C	chrXV_271045_T_C	0.373234	0.0437264	chrXV	1.18362e-41	chrXV_270103_T_C chrXV_270103_T_C chrXV_271045_T_C chrXV_271045_T_C	393	TRUE	chrXV	270103	270735	633	*	FALSE	0.412011	chrXV_270526_C_G	Manganese_Sulfate;;1	0.0001	0.000100005	20.5296	chrXV_271365_T_C,A_45707	chrXV_269745_A_G_45702	chrXV_271953_CT_C_45709	chrXV_271365_T_C,A	chrXV_269745_A_G
Neomycin;5mg/mL;2	YAR042W	SWH1	chrI	192518	198825	6308	+	1	BYa	increase	0	0.692006	chrI_193631_A_T				0.0001	0.000100005	10.72	chrI_193631_A_T_1381	chrI_192693_C_T_1375	chrI_197123_G_A_1423	chrI_193631_A_T	chrI_192693_C_T	chrI_197123_G_A	-0.174546	0.031623	chrI	9.18167e-14	chrI_191617_T_C chrI_192139_G_A chrI_196500_C_T chrI_197587_G_A	375	TRUE	chrI	176230	198623	22394	*	FALSE	0.141193	chrI_193631_A_T	Neomycin;5mg/mL;2	0.0001	0.000100005	27.9791	chrI_193631_A_T_1282	chrI_192954_C_A_1278	chrI_193631_A_T_1282	chrI_193631_A_T	chrI_192954_C_A
Neomycin;5mg/mL;2	YDL227C	HO	chrIV	46094	49572	3479	-	1	YPS1009x	decrease	0	0.501623	chrIV_48065_G_A				0.0001	0.000100005	145.551	chrIV_48008_A_G_9361	chrIV_48008_A_G_9361	chrIV_48737_A_G_9365	chrIV_48008_A_G	chrIV_48008_A_G	chrIV_48737_A_G	-0.586245	0.320968	chrIV	9.62155e-145	chrIV_48008_A_G chrIV_48008_A_G chrIV_48737_A_G chrIV_48737_A_G	3008	TRUE	chrIV	48008	48393	386	*	FALSE	0.245238	chrIV_48065_G_A	Neomycin;5mg/mL;2	0.0001	0.000100005	257.999	chrIV_48008_A_G_10510	chrIV_48008_A_G_10510	chrIV_48346_G_A_10512	chrIV_48008_A_G	chrIV_48008_A_G
Neomycin;5mg/mL;2	YLR057W	MNL2	chrXII	255132	257922	2791	+	1	CLIB413a	decrease	0	0.413694	chrXII_256478_G_A				0.0001	0.000100005	18.801	chrXII_256781_A_G_33186	chrXII_253806_T_C_33171	chrXII_257034_G_A_33188	chrXII_256781_A_G	chrXII_253806_T_C	chrXII_257034_G_A	0.198998	0.0375894	chrXII	2.47911e-20	chrXII_253274_A_G chrXII_254691_A_G chrXII_257034_G_A chrXII_257034_G_A	377	TRUE	chrXII	255736	257034	1299	*	FALSE	0.289362	chrXII_256781_A_G	Neomycin;5mg/mL;2	0.0001	0.000100005	47.917	chrXII_256508_A_G_49856	chrXII_255164_GA_GAA,GAAA,AA,G_49844	chrXII_256855_C_T_49865	chrXII_256508_A_G	chrXII_255164_GA_GAA,GAAA,AA,G
Neomycin;5mg/mL;2	YOL130W	ALR1	chrXV	73878	77268	3391	+	1	PW5a	decrease	0	0.215351	chrXV_76376_G_A				0.0001	0.000100005	20.7673	chrXV_77907_T_C_68581	chrXV_66666_G_A_68376	chrXV_97058_C_T_68769	chrXV_77907_T_C	chrXV_66666_G_A	chrXV_97058_C_T	-0.208047	0.0492101	chrXV	8.95721e-23	chrXV_71932_G_T chrXV_75413_A_C chrXV_81792_A_G chrXV_84299_A_C	3049	TRUE	chrXV	57120	84472	27353	*	FALSE	0.130769	chrXV_77907_T_C	Neomycin;5mg/mL;2	0.0001	0.000100005	70.3693	chrXV_76370_G_A_80080	chrXV_75605_G_A_80045	chrXV_76439_C_T_80092	chrXV_76370_G_A	chrXV_75605_G_A
Neomycin;5mg/mL;2	YOL130W	ALR1	chrXV	73878	77268	3391	+	1	YPS1009x	increase	0	0.996629	chrXV_76655_A_G				0.0001	0.000100005	88.5082	chrXV_75243_T_C_65307	chrXV_73589_T_C_65289	chrXV_79673_C_A_65366	chrXV_75243_T_C	chrXV_73589_T_C	chrXV_79673_C_A	0.419276	0.176595	chrXV	6.62023e-90	chrXV_71084_C_T chrXV_72481_G_A chrXV_78272_T_G chrXV_78920_A_G	3008	TRUE	chrXV	70740	78663	7924	*	FALSE	0.138861	chrXV_75243_T_C	Neomycin;5mg/mL;2	0.0001	0.000100005	150.536	chrXV_76655_A_G_73366	chrXV_76655_A_G_73366	chrXV_76776_T_C_73374	chrXV_76655_A_G	chrXV_76655_A_G
Raffinose;;1	YOR128C	ADE2	chrXV	564334	566533	2200	-	1	CLIB219x	decrease	0	1	chrXV_565236_A_G				0.0001	0.000100005	370.643	chrXV_565236_A_G_80089	chrXV_565236_A_G_80089	chrXV_566820_A_T_80103	chrXV_565236_A_G	chrXV_565236_A_G	chrXV_566820_A_T	0.922009	0.719125	chrXV	0	chrXV_565236_A_G chrXV_565236_A_G chrXV_566265_C_T chrXV_566265_C_T	3028	TRUE	chrXV	565236	566695	1460	*	FALSE	0.0666667	chrXV_565236_A_G	Raffinose;;1	0.0001	0.000100005	384.47	chrXV_565236_A_G_67534	chrXV_565236_A_G_67534	chrXV_565236_A_G_67534	chrXV_565236_A_G	chrXV_565236_A_G
SDS;0.075%;3	YHL042W		chrVIII	15540	16754	1215	+	1	M22	decrease	0	0.388889	chrVIII_15741_C_CTT,CTTT				0.0001	0.000100005	100.842	chrVIII_16308_T_C_20258	chrVIII_15741_C_CTT,CTTT_20256	chrVIII_17157_A_G_20274	chrVIII_16308_T_C	chrVIII_15741_C_CTT,CTTT	chrVIII_17157_A_G	-0.679271	0.2404	chrVIII	6.02872e-101	chrVIII_16308_T_C chrVIII_16308_T_C chrVIII_16326_G_A chrVIII_16326_G_A	375	TRUE	chrVIII	16308	16326	19	*	FALSE	0.472527	chrVIII_16308_T_C	SDS;0.075%;3	0.0001	0.000100005	249.755	chrVIII_15220_C_T_37138	chrVIII_15220_C_T_37138	chrVIII_16634_C_T_37154	chrVIII_15220_C_T	chrVIII_15220_C_T
SDS;0.075%;3	YML123C	PHO84	chrXIII	23860	25918	2059	-	1	BYa	decrease	0	0.526101	chrXIII_25294_A_G				0.0001	0.000100005	46.2785	chrXIII_25025_A_G_36886	chrXIII_25025_A_G_36886	chrXIII_26591_CTT_C,CT,*_36896	chrXIII_25025_A_G	chrXIII_25025_A_G	chrXIII_26591_CTT_C,CT,*	0.339151	0.11222	chrXIII	2.59153e-49	chrXIII_24565_A_G chrXIII_24565_A_G chrXIII_25294_A_G chrXIII_25638_C_T	375	TRUE	chrXIII	24565	26434	1870	*	FALSE	0.724508	chrXIII_25025_A_G	SDS;0.075%;3	0.0001	0.000100005	125.271	chrXIII_25294_A_G_36539	chrXIII_25025_A_G_36538	chrXIII_25638_C_T_36540	chrXIII_25294_A_G	chrXIII_25025_A_G
SDS;0.075%;3	YPL092W	SSU1	chrXVI	373357	375334	1978	+	1	M22	increase	0	1	chrXVI_374061_A_G				0.0001	0.000100005	123.871	chrXVI_373847_A_G_48461	chrXVI_373847_A_G_48461	chrXVI_373847_A_G_48461	chrXVI_373847_A_G	chrXVI_373847_A_G	chrXVI_373847_A_G	0.788211	0.112361	chrXVI	1.76608e-125	chrXVI_373847_A_G chrXVI_373847_A_G chrXVI_373946_G_A chrXVI_374261_C_T	375	TRUE	chrXVI	373847	373847	1	*	FALSE	0.960417	chrXVI_373847_A_G	SDS;0.075%;3	0.0001	0.000100005	259.416	chrXVI_373699_GC_G_86334	chrXVI_373699_GC_G_86334	chrXVI_374149_C_T_86337	chrXVI_373699_GC_G	chrXVI_373699_GC_G
Sorbitol;1.5M;2	YKL038W	RGT1	chrXI	364899	369240	4342	+	1	CLIB219x	decrease	0	0.245478	chrXI_367187_TC_T				0.0001	0.000100005	45.6688	chrXI_369169_G_A_44448	chrXI_364194_C_T_44400	chrXI_369432_T_A_44449	chrXI_369169_G_A	chrXI_364194_C_T	chrXI_369432_T_A	-0.367479	0.126738	chrXI	2.90382e-47	chrXI_366681_A_C chrXI_368205_G_C chrXI_369998_C_T chrXI_370874_A_G	3043	TRUE	chrXI	364194	371457	7264	*	FALSE	0.215144	chrXI_369169_G_A	Sorbitol;1.5M;2	0.0001	0.000100005	96.8424	chrXI_367187_TC_T_53337	chrXI_367187_TC_T_53337	chrXI_367554_C_T_53342	chrXI_367187_TC_T	chrXI_367187_TC_T
Tunicamycin;3uM;3	YGR155W	CYS4	chrVII	798205	800305	2101	+	1	M22	decrease	0	1	chrVII_798910_T_A				0.0001	0.000100005	79.6793	chrVII_798845_C_T_34981	chrVII_798845_C_T_34981	chrVII_798911_C_T_34983	chrVII_798845_C_T	chrVII_798845_C_T	chrVII_798911_C_T	-0.322588	0.112913	chrVII	2.22761e-87	chrVII_798565_C_T chrVII_798845_C_T chrVII_798845_C_T chrVII_798910_T_A	3028	TRUE	chrVII	798565	798910	346	*	FALSE	0.792982	chrVII_798845_C_T	Tunicamycin;3uM;3	0.0001	0.000100005	56.7534	chrVII_798910_T_A_18604	chrVII_798910_T_A_18604	chrVII_798910_T_A_18604	chrVII_798910_T_A	chrVII_798910_T_A
Tunicamycin;3uM;3	YOR128C	ADE2	chrXV	564334	566533	2200	-	1	CLIB219x	decrease	0	0.99991	chrXV_565236_A_G				0.0001	0.000100005	178.144	chrXV_565236_A_G_80089	chrXV_565236_A_G_80089	chrXV_566820_A_T_80103	chrXV_565236_A_G	chrXV_565236_A_G	chrXV_566820_A_T	0.51648	0.166714	chrXV	2.70589e-182	chrXV_565236_A_G chrXV_565236_A_G chrXV_566265_C_T chrXV_566265_C_T	3028	TRUE	chrXV	565236	566695	1460	*	FALSE	0.0665693	chrXV_565236_A_G	Tunicamycin;3uM;3	0.0001	0.000100005	189.052	chrXV_565236_A_G_67534	chrXV_565236_A_G_67534	chrXV_565236_A_G_67534	chrXV_565236_A_G	chrXV_565236_A_G
YNB;;1	YGR155W	CYS4	chrVII	798205	800305	2101	+	1	M22	decrease	0	1	chrVII_798910_T_A				0.0001	0.000100005	210.362	chrVII_798910_T_A_34982	chrVII_798910_T_A_34982	chrVII_798911_C_T_34983	chrVII_798910_T_A	chrVII_798910_T_A	chrVII_798911_C_T	-0.406102	0.421032	chrVII	1.23875e-41	chrVII_798910_T_A chrVII_798910_T_A chrVII_798910_T_A chrVII_798910_T_A	3028	TRUE	chrVII	798910	798910	1	*	FALSE	0.495935	chrVII_798910_T_A	YNB;;1	0.0001	0.000100005	273.423	chrVII_798910_T_A_18604	chrVII_798910_T_A_18604	chrVII_798910_T_A_18604	chrVII_798910_T_A	chrVII_798910_T_A
YNB;;1	YOR128C	ADE2	chrXV	564334	566533	2200	-	1	CLIB219x	decrease	0	1	chrXV_565236_A_G				0.0001	0.000100005	389.23	chrXV_565236_A_G_80089	chrXV_565236_A_G_80089	chrXV_566820_A_T_80103	chrXV_565236_A_G	chrXV_565236_A_G	chrXV_566820_A_T	0.774056	0.453102	chrXV	0	chrXV_565236_A_G chrXV_565236_A_G chrXV_566265_C_T chrXV_566265_C_T	3028	TRUE	chrXV	565236	566695	1460	*	FALSE	0.0666667	chrXV_565236_A_G	YNB;;1	0.0001	0.000100005	420.12	chrXV_565236_A_G_67534	chrXV_565236_A_G_67534	chrXV_565236_A_G_67534	chrXV_565236_A_G	chrXV_565236_A_G
YPD;37;1	YOR128C	ADE2	chrXV	564334	566533	2200	-	1	CLIB219x	decrease	0	1	chrXV_565236_A_G				0.0001	0.000100005	292.207	chrXV_565236_A_G_80089	chrXV_565236_A_G_80089	chrXV_566820_A_T_80103	chrXV_565236_A_G	chrXV_565236_A_G	chrXV_566820_A_T	0.844372	0.592421	chrXV	2.99333e-292	chrXV_565236_A_G chrXV_565236_A_G chrXV_566265_C_T chrXV_566265_C_T	3028	TRUE	chrXV	565236	566695	1460	*	FALSE	0.0666667	chrXV_565236_A_G	YPD;37;1	0.0001	0.000100005	346.235	chrXV_565236_A_G_67534	chrXV_565236_A_G_67534	chrXV_565236_A_G_67534	chrXV_565236_A_G	chrXV_565236_A_G
YPD;;1	YOR128C	ADE2	chrXV	564334	566533	2200	-	1	CLIB219x	decrease	0	1	chrXV_565236_A_G				0.0001	0.000100005	391.085	chrXV_565236_A_G_80089	chrXV_565236_A_G_80089	chrXV_566820_A_T_80103	chrXV_565236_A_G	chrXV_565236_A_G	chrXV_566820_A_T	0.750201	0.700219	chrXV	5.67932e-84	chrXV_565236_A_G chrXV_565236_A_G chrXV_566265_C_T chrXV_566265_C_T	3028	TRUE	chrXV	565236	566695	1460	*	FALSE	0.0666667	chrXV_565236_A_G	YPD;;1	0.0001	0.000100005	441.809	chrXV_565236_A_G_67534	chrXV_565236_A_G_67534	chrXV_565236_A_G_67534	chrXV_565236_A_G	chrXV_565236_A_G
YPD;;1	YPL091W	GLR1	chrXVI	375335	377121	1787	+	1	YJM981x	increase	0	1	chrXVI_376683_A_G				0.0001	0.000100005	10.2992	chrXVI_374156_G_T_36479	chrXVI_373674_G_A_36476	chrXVI_376975_A_C_36484	chrXVI_374156_G_T	chrXVI_373674_G_A	chrXVI_376975_A_C	0.344355	0.0618015	chrXVI	2.86845e-19	chrXVI_373674_G_A chrXVI_373674_G_A chrXVI_376683_A_G chrXVI_376683_A_G	3003	TRUE	chrXVI	373674	374422	749	*	FALSE	0.173937	chrXVI_374156_G_T	YPD;;1	0.0001	0.000100005	30.4563	chrXVI_375375_T_A_74490	chrXVI_375375_T_A_74490	chrXVI_379219_C_T_74520	chrXVI_375375_T_A	chrXVI_375375_T_A
Zeocin;25ug/mL;3	YDR246W	TRS23	chrIV	954134	955039	906	+	1	273614xa	decrease	0	1	chrIV_954920_C_CA				0.0001	0.000100005	122.26	chrIV_954920_C_CA_16369	chrIV_954022_C_T_16364	chrIV_955574_T_G_16379	chrIV_954920_C_CA	chrIV_954022_C_T	chrIV_955574_T_G	0.536169	0.277231	chrIV	3.39093e-123	chrIV_954920_C_CA chrIV_954920_C_CA chrIV_954939_C_T chrIV_954985_A_C	3049	TRUE	chrIV	954920	954954	35	*	FALSE	0.194696	chrIV_954941_A_G	Zeocin;25ug/mL;3	0.0001	0.000100005	140.58	chrIV_954920_C_CA_7352	chrIV_954920_C_CA_7352	chrIV_955222_C_T_7353	chrIV_954920_C_CA	chrIV_954920_C_CA
Zeocin;25ug/mL;3	YOR153W	PDR5	chrXV	619064	624551	5488	+	1	YJM145x	decrease	0	0.0432703	chrXV_623643_C_T				0.0001	0.000100005	32.7626	chrXV_622303_C_T_61601	chrXV_618241_G_T_61452	chrXV_624626_T_A_61767	chrXV_622303_C_T	chrXV_618241_G_T	chrXV_624626_T_A	0.227713	0.0335053	chrXV	2.87652e-36	chrXV_618956_T_C chrXV_620025_A_G chrXV_624258_G_A chrXV_624930_A_G	B	TRUE	chrXV	614146	626072	11927	*	FALSE	0.0451807	chrXV_622303_C_T	Zeocin;25ug/mL;3	0.0001	0.000100005	11.8772	chrXV_623556_G_A_47353	chrXV_623556_G_A_47353	chrXV_623700_C_T_47374	chrXV_623556_G_A	chrXV_623556_G_A
EtOH_Glucose;;1	YOR128C	ADE2	chrXV	564334	566533	2200	-	1	CLIB219x	decrease	0	0.99995	chrXV_565236_A_G				0.0001	0.000100005	361.466	chrXV_565236_A_G_80089	chrXV_565236_A_G_80089	chrXV_566820_A_T_80103	chrXV_565236_A_G	chrXV_565236_A_G	chrXV_566820_A_T	0.926856	0.697079	chrXV	0	chrXV_565236_A_G chrXV_565236_A_G chrXV_566265_C_T chrXV_566265_C_T	3028	TRUE	chrXV	565236	566695	1460	*	FALSE	0.0666248	chrXV_565236_A_G	EtOH_Glucose;;1	0.0001	0.000100005	381.765	chrXV_565236_A_G_67534	chrXV_565236_A_G_67534	chrXV_565236_A_G_67534	chrXV_565236_A_G	chrXV_565236_A_G
Maltose;;1	YGR287C	IMA1	chrVII	1066081	1069641	3561	-	1	YJM145x	increase	0	0.152306	chrVII_1067046_C_G				0.0001	0.000100005	125.383	chrVII_1067171_C_A_20565	chrVII_1066308_A_G_20558	chrVII_1083537_A_G_20696	chrVII_1067171_C_A	chrVII_1066308_A_G	chrVII_1083537_A_G	0.410665	0.356933	chrVII	2.80049e-08	chrVII_1066308_A_G chrVII_1066596_G_A chrVII_1067171_C_A chrVII_1067171_C_A	377	TRUE	chrVII	1066252	1082736	16485	*	FALSE	0.553936	chrVII_1067171_C_A	Maltose;;1	0.0001	0.000100005	224.457	chrVII_1067375_C_A_29013	chrVII_1067375_C_A_29013	chrVII_1067435_A_G_29027	chrVII_1067375_C_A	chrVII_1067375_C_A
Neomycin;5mg/mL;2	YOL130W	ALR1	chrXV	73878	77268	3391	+	1	I14a	decrease	2.41353e-18	0.863139	chrXV_76655_A_G				0.0001	0.000100005	150.536	chrXV_76655_A_G_73366	chrXV_76655_A_G_73366	chrXV_76776_T_C_73374	chrXV_76655_A_G	chrXV_76655_A_G	chrXV_76776_T_C	0.438298	0.181328	chrXV	3.93561e-149	chrXV_76655_A_G chrXV_76655_A_G chrXV_76693_A_C chrXV_76693_A_C	2999	TRUE	chrXV	76655	76718	64	*	FALSE	0.781818	chrXV_76655_A_G	Neomycin;5mg/mL;2	0.0001	0.000100005	61.669	chrXV_77240_T_C_60777	chrXV_76655_A_G_60761	chrXV_80113_C_A_60789	chrXV_77240_T_C	chrXV_76655_A_G
Sorbitol;1.5M;2	YDL242W		chrIV	18762	19972	1211	+	1	YJM981x	decrease	4.72435e-18	0.328285	chrIV_19322_A_ATTT				0.0001	0.000100005	12.1845	chrIV_20065_G_A_9828	chrIV_330_C_G_9670	chrIV_20805_G_A_9850	chrIV_20065_G_A	chrIV_330_C_G	chrIV_20805_G_A	-0.194814	0.0361367	chrIV	2.75053e-14	chrIV_19084_T_C chrIV_19119_A_G chrIV_22513_A_G chrIV_26997_C_T	3004	TRUE	chrIV	330	28639	28310	*	FALSE	0.0449748	chrIV_20065_G_A	Sorbitol;1.5M;2	0.0001	0.000100005	114.869	chrIV_19322_A_ATTT_4235	chrIV_19322_A_ATTT_4235	chrIV_19581_T_C_4241	chrIV_19322_A_ATTT	chrIV_19322_A_ATTT
Tunicamycin;3uM;3	YDL055C	PSA1	chrIV	355526	358291	2766	-	1	YJM145x	increase	6.93889e-18	0.915875	chrIV_356133_A_G				0.0001	0.000100005	29.598	chrIV_355467_A_G_7743	chrIV_341565_A_C_7666	chrIV_356133_A_G_7745	chrIV_355467_A_G	chrIV_341565_A_C	chrIV_356133_A_G	0.274916	0.0755037	chrIV	1.01335e-30	chrIV_354052_T_C chrIV_354712_A_C chrIV_356133_A_G chrIV_356133_A_G	377	TRUE	chrIV	348778	358080	9303	*	FALSE	0.369863	chrIV_355467_A_G	Tunicamycin;3uM;3	0.0001	0.000100005	87.7531	chrIV_356965_A_G_10478	chrIV_356133_A_G_10471	chrIV_357312_T_C_10480	chrIV_356965_A_G	chrIV_356133_A_G
YPD;;1	YGR155W	CYS4	chrVII	798205	800305	2101	+	1	M22	decrease	9.06305e-18	0.555182	chrVII_799451_C_T				0.0001	0.000100005	65.3527	chrVII_799451_C_T_34984	chrVII_799451_C_T_34984	chrVII_799595_A_G_34985	chrVII_799451_C_T	chrVII_799451_C_T	chrVII_799595_A_G	-0.243256	0.0458928	chrVII	4.17303e-69	chrVII_799451_C_T chrVII_799451_C_T chrVII_799451_C_T chrVII_799451_C_T	3028	TRUE	chrVII	799451	799451	1	*	FALSE	0.49501	chrVII_799451_C_T	YPD;;1	0.0001	0.000100005	31.1822	chrVII_798910_T_A_18604	chrVII_796413_G_T_18587	chrVII_798910_T_A_18604	chrVII_798910_T_A	chrVII_796413_G_T
Caffeine;15mM;2	YKL203C	TOR2	chrXI	55768	63589	7822	-	0.999988	BYa	decrease	2.44593e-07	0.570195	chrXI_56757_A_T				0.0001	0.000100005	110.487	chrXI_56757_A_T_28742	chrXI_56302_C_T_28740	chrXI_59361_A_G_28747	chrXI_56757_A_T	chrXI_56302_C_T	chrXI_59361_A_G	0.442363	0.18227	chrXI	8.18101e-111	chrXI_56302_C_T chrXI_56302_C_T chrXI_58986_C_A chrXI_59004_T_A	375	TRUE	chrXI	56302	59823	3522	*	FALSE	0.498674	chrXI_56757_A_T	Caffeine;15mM;2	0.0001	0.000100005	157.303	chrXI_55837_A_T_28373	chrXI_55092_G_A_28370	chrXI_62759_T_C_28397	chrXI_55837_A_T	chrXI_55092_G_A
Zeocin;25ug/mL;3	YML123C	PHO84	chrXIII	23860	25918	2059	-	0.999913	BYa	decrease	1.94421e-06	0.973213	chrXIII_25025_A_G				0.0001	0.000100005	27.1213	chrXIII_25025_A_G_36886	chrXIII_25025_A_G_36886	chrXIII_25294_A_G_36887	chrXIII_25025_A_G	chrXIII_25025_A_G	chrXIII_25294_A_G	0.243369	0.0612739	chrXIII	2.5311e-29	chrXIII_24565_A_G chrXIII_24565_A_G chrXIII_25638_C_T chrXIII_26251_G_A	375	TRUE	chrXIII	24565	26591	2027	*	FALSE	0.578067	chrXIII_25025_A_G	Zeocin;25ug/mL;3	0.0001	0.000100005	82.4793	chrXIII_25025_A_G_36538	chrXIII_25025_A_G_36538	chrXIII_25638_C_T_36540	chrXIII_25025_A_G	chrXIII_25025_A_G
YPD;15;1	YML123C	PHO84	chrXIII	23860	25918	2059	-	0.999895	BYa	decrease	3.91974e-06	0.570671	chrXIII_25294_A_G				0.0001	0.000100005	35.3918	chrXIII_25294_A_G_36887	chrXIII_25025_A_G_36886	chrXIII_25294_A_G_36887	chrXIII_25294_A_G	chrXIII_25025_A_G	chrXIII_25294_A_G	0.320644	0.0901947	chrXIII	1.48941e-36	chrXIII_24565_A_G chrXIII_25025_A_G chrXIII_25638_C_T chrXIII_26251_G_A	375	TRUE	chrXIII	24565	26589	2025	*	FALSE	0.58194	chrXIII_25294_A_G	YPD;15;1	0.0001	0.000100005	107.125	chrXIII_25025_A_G_36538	chrXIII_25025_A_G_36538	chrXIII_25025_A_G_36538	chrXIII_25025_A_G	chrXIII_25025_A_G
Caffeine;15mM;2	YOR153W	PDR5	chrXV	619064	624551	5488	+	0.999853	YJM145x	decrease	6.62185e-06	0.843626	chrXV_624551_C_T				0.0618	0.0160436	13.1068	chrXV_624475_ATT_A,AT_47463	chrXV_623184_C_T_47329	chrXV_628209_G_A_47469	chrXV_624475_ATT_A,AT	chrXV_623184_C_T	chrXV_628209_G_A	-0.308139	0.0223629	chrXV	6.06228e-16	chrXV_620961_C_T chrXV_624331_T_C chrXV_626072_T_C chrXV_626072_T_C	377	TRUE	chrXV	624279	626072	1794	*	FALSE	0.323838	chrXV_624475_ATT_A,AT	Caffeine;15mM;2	0.0001	0.000100005	74.2813	chrXV_624258_G_A_61750	chrXV_624258_G_A_61750	chrXV_624626_T_A_61767	chrXV_624258_G_A	chrXV_624258_G_A
Lithium_Chloride;100mM;2	YDR041W	RSM10	chrIV	539135	540506	1372	+	0.999743	YJM454a	increase	1.12609e-05	0.999743	chrIV_539402_T_C				0.0001	0.000100005	234.301	chrIV_538660_T_C_12339	chrIV_538081_A_G_12336	chrIV_539402_T_C_12356	chrIV_538660_T_C	chrIV_538081_A_G	chrIV_539402_T_C	-0.807929	0.713293	chrIV	1.84993e-236	chrIV_538660_T_C chrIV_538660_T_C chrIV_538660_T_C chrIV_538733_GTATATATATATATATA_GTATA,GTATATA,G,GTATATATA,GTA,GTATATATATATATA	3008	TRUE	chrIV	538660	539295	636	*	FALSE	0.196039	chrIV_538660_T_C	Lithium_Chloride;100mM;2	0.0001	0.000100005	337.4	chrIV_539402_T_C_9095	chrIV_539402_T_C_9095	chrIV_539780_A_G_9096	chrIV_539402_T_C	chrIV_539402_T_C
Galactose;;1	YDR009W	GAL3	chrIV	463018	465022	2005	+	0.999723	YPS1009x	decrease	1.60957e-05	0.999633	chrIV_463587_G_C				0.0001	0.000100005	241.673	chrIV_463587_G_C_12011	chrIV_463587_G_C_12011	chrIV_463737_C_T_12012	chrIV_463587_G_C	chrIV_463587_G_C	chrIV_463737_C_T	-0.532478	0.669214	chrIV	2.29357e-19	chrIV_463263_C_A chrIV_463263_C_A chrIV_463587_G_C chrIV_463587_G_C	3008	TRUE	chrIV	463263	463737	475	*	FALSE	0.452165	chrIV_463587_G_C	Galactose;;1	0.0001	0.000100005	357.073	chrIV_463379_G_A_13290	chrIV_463379_G_A_13290	chrIV_463587_G_C_13291	chrIV_463379_G_A	chrIV_463379_G_A
Raffinose;;1	YOR125C	CAT5	chrXV	558836	559845	1010	-	0.999638	YJM145x	decrease	2.22769e-05	0.415997	chrXV_559768_T_G				0.0001	0.000100005	32.4545	chrXV_559714_T_A_47024	chrXV_559714_T_A_47024	chrXV_561027_GA_G_47031	chrXV_559714_T_A	chrXV_559714_T_A	chrXV_561027_GA_G	-0.42121	0.319209	chrXV	2.62792e-33	chrXV_558497_G_A chrXV_559546_G_A chrXV_560432_G_A chrXV_562226_A_G	377	TRUE	chrXV	553950	562468	8519	*	FALSE	0.649237	chrXV_559714_T_A	Raffinose;;1	0.0001	0.000100005	83.4735	chrXV_559459_T_C_61134	chrXV_559459_T_C_61134	chrXV_559768_T_G_61138	chrXV_559459_T_C	chrXV_559459_T_C
Fructose;;1	YOL081W	IRA2	chrXV	170522	180432	9911	+	0.999636	RMx	decrease	2.82736e-05	0.25499	chrXV_171973_T_C				0.0001	0.000100005	42.8671	chrXV_171973_T_C_69626	chrXV_169572_C_T_69604	chrXV_172825_C_T_69636	chrXV_171973_T_C	chrXV_169572_C_T	chrXV_172825_C_T	0.392671	0.115011	chrXV	7.25637e-46	chrXV_171511_A_C chrXV_171511_A_C chrXV_176547_C_T chrXV_178587_G_A	376	TRUE	chrXV	171511	174678	3168	*	FALSE	0.177448	chrXV_171973_T_C	Fructose;;1	0.0001	0.000100005	44.7639	chrXV_171150_T_C_43758	chrXV_163253_T_C_43638	chrXV_172102_G_A_43769	chrXV_171150_T_C	chrXV_163253_T_C
Fluconazole;100uM;2	YHR007C	ERG11	chrVIII	119765	122115	2351	-	0.999209	BYa	decrease	4.14307e-05	0.332141	chrVIII_121733_G_GA				0.0001	0.000100005	22.3834	chrVIII_121315_T_C_20917	chrVIII_101020_G_A_20843	chrVIII_121315_T_C_20917	chrVIII_121315_T_C	chrVIII_101020_G_A	chrVIII_121315_T_C	0.218076	0.0504253	chrVIII	3.06662e-24	chrVIII_118068_A_G chrVIII_119414_A_G chrVIII_122014_T_C chrVIII_122753_T_C	375	TRUE	chrVIII	115977	134097	18121	*	FALSE	0.51733	chrVIII_121315_T_C	Fluconazole;100uM;2	0.0001	0.000100005	32.3789	chrVIII_121733_G_GA_20553	chrVIII_121315_T_C_20552	chrVIII_121745_A_T_20554	chrVIII_121733_G_GA	chrVIII_121315_T_C
Cobalt_Chloride;2mM;2	YAR042W	SWH1	chrI	192518	198825	6308	+	0.999151	BYa	decrease	5.5115e-05	0.773285	chrI_193631_A_T				0.0001	0.000100005	23.4919	chrI_193631_A_T_1282	chrI_192954_C_A_1278	chrI_193631_A_T_1282	chrI_193631_A_T	chrI_192954_C_A	chrI_193631_A_T	0.197741	0.0373175	chrI	5.59799e-24	chrI_192795_C_T chrI_192954_C_A chrI_194290_C_A chrI_194867_A_T	A	TRUE	chrI	192618	194499	1882	*	FALSE	0.309696	chrI_193631_A_T	Cobalt_Chloride;2mM;2	0.0001	0.000100005	23.0183	chrI_193631_A_T_1381	chrI_176650_G_A_995	chrI_194290_C_A_1387	chrI_193631_A_T	chrI_176650_G_A
Fructose;;1	YNL132W	KRE33	chrXIV	375006	378628	3623	+	0.999145	RMx	decrease	6.84407e-05	0.688426	chrXIV_377031_A_G				0.0012	0.000328695	16.8484	chrXIV_377031_A_G_65246	chrXIV_372366_G_A_65208	chrXIV_377864_T_C_65252	chrXIV_377031_A_G	chrXIV_372366_G_A	chrXIV_377864_T_C	0.303547	0.0227205	chrXIV	2.29801e-20	chrXIV_374157_T_G chrXIV_374969_AT_A,TT chrXIV_378863_A_G chrXIV_380619_T_A	376	TRUE	chrXIV	375142	378863	3722	*	FALSE	0.178006	chrXIV_377031_A_G	Fructose;;1	0.0001	0.000100005	51.2463	chrXIV_377031_A_G_40942	chrXIV_376313_C_T_40938	chrXIV_377751_G_A_40944	chrXIV_377031_A_G	chrXIV_376313_C_T
Lactate;;1	YOL081W	IRA2	chrXV	170522	180432	9911	+	0.9991	YPS163a	increase	8.20809e-05	0.671319	chrXV_175512_C_T				0.0001	0.000100005	21.9898	chrXV_172278_G_A_58599	chrXV_171460_A_G_58595	chrXV_185566_C_A_58702	chrXV_172278_G_A	chrXV_171460_A_G	chrXV_185566_C_A	0.198195	0.0774975	chrXV	1.02043e-21	chrXV_165797_C_A chrXV_168885_C_T chrXV_181215_A_G chrXV_184291_A_C	B	TRUE	chrXV	165370	182727	17358	*	FALSE	0.073085	chrXV_172278_G_A	Lactate;;1	0.0001	0.000100005	74.9426	chrXV_175290_T_C_69654	chrXV_171973_T_C_69626	chrXV_175512_C_T_69658	chrXV_175290_T_C	chrXV_171973_T_C
Congo_Red;75ug/mL;3	YOR125C	CAT5	chrXV	558836	559845	1010	-	0.998909	BYa	decrease	9.83557e-05	0.694114	chrXV_558913_G_C				0.0001	0.000100005	40.4089	chrXV_558912_C_T_45895	chrXV_557722_T_C_45889	chrXV_559768_T_G_45902	chrXV_558912_C_T	chrXV_557722_T_C	chrXV_559768_T_G	0.307216	0.0849003	chrXV	6.36214e-42	chrXV_554076_G_A chrXV_556870_T_G chrXV_559714_T_A chrXV_560189_T_A	A	TRUE	chrXV	551813	567267	15455	*	FALSE	0.263107	chrXV_558912_C_T	Congo_Red;75ug/mL;3	0.0001	0.000100005	46.8029	chrXV_558913_G_C_46183	chrXV_558913_G_C_46183	chrXV_562567_C_T_46203	chrXV_558913_G_C	chrXV_558913_G_C
Trehalose;;1	YOR128C	ADE2	chrXV	564334	566533	2200	-	0.99875	CLIB219x	decrease	0.00011663	0.99875	chrXV_565236_A_G				0.0001	0.000100005	168.232	chrXV_565236_A_G_67534	chrXV_564154_C_G_67527	chrXV_565236_A_G_67534	chrXV_565236_A_G	chrXV_564154_C_G	chrXV_565236_A_G	-0.796044	0.478944	chrXV	3.55087e-169	chrXV_565236_A_G chrXV_565236_A_G chrXV_565236_A_G chrXV_565236_A_G	3043	TRUE	chrXV	564154	565236	1083	*	FALSE	0.692635	chrXV_565236_A_G	Trehalose;;1	0.0001	0.000100005	295.856	chrXV_565236_A_G_80089	chrXV_565236_A_G_80089	chrXV_566820_A_T_80103	chrXV_565236_A_G	chrXV_565236_A_G
EtOH;;1	YNL139C	THO2	chrXIV	360924	365874	4951	-	0.998571	YJM145x	decrease	0.000137135	0.697366	chrXIV_364987_G_A				0.0001	0.000100005	19.669	chrXIV_364987_G_A_42756	chrXIV_348794_G_A_42601	chrXIV_377578_A_G_42784	chrXIV_364987_G_A	chrXIV_348794_G_A	chrXIV_377578_A_G	-0.252767	0.0561064	chrXIV	1.08924e-21	chrXIV_358067_T_C chrXIV_359506_T_G chrXIV_366762_A_G chrXIV_367094_G_A	377	TRUE	chrXIV	359147	367644	8498	*	FALSE	0.240705	chrXIV_364987_G_A	EtOH;;1	0.0001	0.000100005	48.7266	chrXIV_364317_A_T_54858	chrXIV_364011_C_A,T_54857	chrXIV_364987_G_A_54861	chrXIV_364317_A_T	chrXIV_364011_C_A,T
Manganese_Sulfate;;1	YGL167C	PMR1	chrVII	187616	190797	3182	-	0.998328	BYa	decrease	0.000160741	0.757789	chrVII_189229_A_T				0.0001	0.000100005	52.9943	chrVII_189229_A_T_16927	chrVII_187532_T_A_16920	chrVII_190037_C_G_16929	chrVII_189229_A_T	chrVII_187532_T_A	chrVII_190037_C_G	0.355458	0.10017	chrVII	1.40597e-53	chrVII_186769_T_C chrVII_188242_A_G chrVII_190037_C_G chrVII_190037_C_G	375	TRUE	chrVII	188242	190661	2420	*	FALSE	0.548552	chrVII_189229_A_T	Manganese_Sulfate;;1	0.0001	0.000100005	199.619	chrVII_188702_G_T_16634	chrVII_188702_G_T_16634	chrVII_189229_A_T_16636	chrVII_188702_G_T	chrVII_188702_G_T
Sorbitol;1.5M;2	YGR155W	CYS4	chrVII	798205	800305	2101	+	0.998305	M22	increase	0.00018399	0.998109	chrVII_798910_T_A				0.0001	0.000100005	26.3847	chrVII_798910_T_A_18604	chrVII_798910_T_A_18604	chrVII_798910_T_A_18604	chrVII_798910_T_A	chrVII_798910_T_A	chrVII_798910_T_A	0.250366	0.0504516	chrVII	4.134e-28	chrVII_797870_G_C chrVII_798196_A_G chrVII_799244_T_C chrVII_799451_C_T	375	TRUE	chrVII	797776	799595	1820	*	FALSE	0.731993	chrVII_798910_T_A	Sorbitol;1.5M;2	0.0001	0.000100005	38.7914	chrVII_798910_T_A_34982	chrVII_797933_C_G_34975	chrVII_799595_A_G_34985	chrVII_798910_T_A	chrVII_797933_C_G
Tunicamycin;3uM;3	YOR153W	PDR5	chrXV	619064	624551	5488	+	0.998287	YJM145x	increase	0.000206807	0.141297	chrXV_624331_T_C				0.0001	0.000100005	57.7962	chrXV_623190_T_G_61630	chrXV_622635_G_A_61623	chrXV_624133_G_A_61725	chrXV_623190_T_G	chrXV_622635_G_A	chrXV_624133_G_A	-0.408345	0.0633833	chrXV	3.66122e-59	chrXV_622393_G_A chrXV_622635_G_A chrXV_623850_T_C chrXV_623873_T_C	B	TRUE	chrXV	622303	624350	2048	*	FALSE	0.159292	chrXV_623190_T_G	Tunicamycin;3uM;3	0.0001	0.000100005	38.1144	chrXV_624331_T_C_47457	chrXV_622434_A_G_47311	chrXV_624391_G_T_47462	chrXV_624331_T_C	chrXV_622434_A_G
Raffinose;;1	YNL139C	THO2	chrXIV	360924	365874	4951	-	0.997595	YJM145x	decrease	0.000239132	0.671661	chrXIV_364987_G_A				0.0001	0.000100005	19.0034	chrXIV_364987_G_A_42756	chrXIV_358880_T_C_42712	chrXIV_365482_G_A_42757	chrXIV_364987_G_A	chrXIV_358880_T_C	chrXIV_365482_G_A	-0.229014	0.0464088	chrXIV	6.40158e-21	chrXIV_356923_GTT_GT,G chrXIV_359506_T_G chrXIV_366695_T_C chrXIV_367502_A_G	377	TRUE	chrXIV	359506	369651	10146	*	FALSE	0.2372	chrXIV_364987_G_A	Raffinose;;1	0.0001	0.000100005	64.762	chrXIV_364317_A_T_54858	chrXIV_364011_C_A,T_54857	chrXIV_364987_G_A_54861	chrXIV_364317_A_T	chrXIV_364011_C_A,T
YPD;;1	YNL132W	KRE33	chrXIV	375006	378628	3623	+	0.997387	RMx	decrease	0.000273539	0.587971	chrXIV_377031_A_G				0.0011	0.00040016	13.1253	chrXIV_377031_A_G_65246	chrXIV_371862_C_T_65205	chrXIV_386898_A_C_65288	chrXIV_377031_A_G	chrXIV_371862_C_T	chrXIV_386898_A_C	0.253995	0.026603	chrXIV	6.49755e-17	chrXIV_372107_G_A chrXIV_372919_T_A chrXIV_384238_T_C chrXIV_388126_T_C	376	TRUE	chrXIV	372919	390263	17345	*	FALSE	0.125326	chrXIV_377031_A_G	YPD;;1	0.0001	0.000100005	69.2428	chrXIV_377031_A_G_40942	chrXIV_376313_C_T_40938	chrXIV_377751_G_A_40944	chrXIV_377031_A_G	chrXIV_376313_C_T
Fluconazole;100uM;2	YAR042W	SWH1	chrI	192518	198825	6308	+	0.997076	BYa	decrease	0.000311408	0.516633	chrI_193631_A_T				0.0001	0.000100005	19.9253	chrI_193631_A_T_1381	chrI_192945_C_T_1376	chrI_193631_A_T_1381	chrI_193631_A_T	chrI_192945_C_T	chrI_193631_A_T	0.204665	0.0370546	chrI	2.3828e-21	chrI_192427_T_C chrI_192693_C_T chrI_194241_C_T chrI_194969_T_C	375	TRUE	chrI	190930	197024	6095	*	FALSE	0.355583	chrI_193631_A_T	Fluconazole;100uM;2	0.0001	0.000100005	20.8371	chrI_193260_T_C_1279	chrI_192302_ACT_A,*_1266	chrI_193631_A_T_1282	chrI_193260_T_C	chrI_192302_ACT_A,*
Galactose;;1	YKL128C	PMU1	chrXI	200525	202655	2131	-	0.9969	CBS2888a	increase	0.000350685	0.147563	chrXI_201419_G_A				0.0001	0.000100005	64.331	chrXI_201511_G_C_43380	chrXI_197360_C_T_43287	chrXI_204407_C_T_43431	chrXI_201511_G_C	chrXI_197360_C_T	chrXI_204407_C_T	-0.34498	0.15816	chrXI	4.21976e-65	chrXI_200986_C_T chrXI_201419_G_A chrXI_201543_T_C chrXI_201616_G_A	3043	TRUE	chrXI	200986	202643	1658	*	FALSE	0.150025	chrXI_201511_G_C	Galactose;;1	0.0001	0.000100005	88.798	chrXI_201312_A_C_46658	chrXI_201312_A_C_46658	chrXI_201550_A_T_46671	chrXI_201312_A_C	chrXI_201312_A_C
Fructose;;1	YGR155W	CYS4	chrVII	798205	800305	2101	+	0.996601	M22	decrease	0.000393029	0.502738	chrVII_799451_C_T				0.0001	0.000100005	50.4243	chrVII_799451_C_T_34984	chrVII_799451_C_T_34984	chrVII_799595_A_G_34985	chrVII_799451_C_T	chrVII_799451_C_T	chrVII_799595_A_G	-0.198549	0.0295681	chrVII	1.75279e-52	chrVII_799451_C_T chrVII_799451_C_T chrVII_799451_C_T chrVII_799451_C_T	3028	TRUE	chrVII	799451	799451	1	*	FALSE	0.484	chrVII_799451_C_T	Fructose;;1	0.0001	0.000100005	22.7589	chrVII_798910_T_A_18604	chrVII_795501_A_G_18579	chrVII_798910_T_A_18604	chrVII_798910_T_A	chrVII_795501_A_G
Cobalt_Chloride;2mM;2	YHL042W		chrVIII	15540	16754	1215	+	0.996241	M22	decrease	0.000439143	0.488722	chrVIII_15741_C_CTT,CTTT				0.0001	0.00326382	31.4428	chrVIII_19433_A_G_37189	chrVIII_19004_A_T_37176	chrVIII_19661_C_T_37193	chrVIII_19433_A_G	chrVIII_19004_A_T	chrVIII_19661_C_T	-0.282897	0.0463791	chrVIII	6.42923e-38	chrVIII_15793_T_C chrVIII_18093_T_G chrVIII_22121_C_T chrVIII_25276_G_A	3028	TRUE	chrVIII	15220	25004	9785	*	FALSE	0.10555	chrVIII_19433_A_G	Cobalt_Chloride;2mM;2	0.0001	0.000100005	38.7973	chrVIII_15239_A_G_20252	chrVIII_15239_A_G_20252	chrVIII_15928_T_C_20257	chrVIII_15239_A_G	chrVIII_15239_A_G
Zeocin;25ug/mL;3	YOR043W	WHI2	chrXV	410265	412667	2403	+	0.996136	CLIB219x	decrease	0.000485431	0.266721	chrXV_412522_G_T				0.0001	0.000100005	46.5157	chrXV_412177_C_T_78793	chrXV_408572_A_G_78767	chrXV_412390_A_T_78795	chrXV_412177_C_T	chrXV_408572_A_G	chrXV_412390_A_T	0.348866	0.146602	chrXV	1.10806e-48	chrXV_408919_A_G chrXV_410064_A_G chrXV_415689_A_G chrXV_417792_G_A	3028	TRUE	chrXV	406687	416186	9500	*	FALSE	0.161912	chrXV_412177_C_T	Zeocin;25ug/mL;3	0.0001	0.000100005	102.421	chrXV_412522_G_T_66527	chrXV_410166_G_A_66514	chrXV_412951_T_A_66532	chrXV_412522_G_T	chrXV_410166_G_A
Cobalt_Chloride;2mM;2	YOR316C	COT1	chrXV	906018	907639	1622	-	0.994607	Y10x	decrease	0.000550871	0.934172	chrXV_907234_CG_C				0.0001	0.000100005	32.8951	chrXV_906721_G_A_65199	chrXV_900929_T_C_65154	chrXV_910022_G_A_65219	chrXV_906721_G_A	chrXV_900929_T_C	chrXV_910022_G_A	-0.311972	0.0941973	chrXV	9.92492e-33	chrXV_896876_C_CTT chrXV_898990_C_A chrXV_910022_G_A chrXV_912582_T_C	3000	TRUE	chrXV	896048	910022	13975	*	FALSE	0.119959	chrXV_906721_G_A	Cobalt_Chloride;2mM;2	0.0001	0.000100005	135.439	chrXV_907197_A_G_86865	chrXV_906890_C_T_86864	chrXV_907492_C_G_86867	chrXV_907197_A_G	chrXV_906890_C_T
Maltose;;1	YOR128C	ADE2	chrXV	564334	566533	2200	-	0.99405	CLIB219x	decrease	0.000621912	0.975795	chrXV_565236_A_G				0.0001	0.000100005	193.537	chrXV_565236_A_G_80089	chrXV_565236_A_G_80089	chrXV_566820_A_T_80103	chrXV_565236_A_G	chrXV_565236_A_G	chrXV_566820_A_T	0.705324	0.454861	chrXV	2.25307e-214	chrXV_565236_A_G chrXV_565236_A_G chrXV_566265_C_T chrXV_566265_C_T	3028	TRUE	chrXV	565236	566695	1460	*	FALSE	0.0665816	chrXV_565236_A_G	Maltose;;1	0.0001	0.000100005	176.112	chrXV_565236_A_G_67534	chrXV_564154_C_G_67527	chrXV_565236_A_G_67534	chrXV_565236_A_G	chrXV_564154_C_G
Congo_Red;75ug/mL;3	YOR128C	ADE2	chrXV	564334	566533	2200	-	0.994037	CLIB219x	decrease	0.000691275	0.975923	chrXV_565236_A_G				0.0001	0.000100005	214.362	chrXV_565236_A_G_67534	chrXV_565236_A_G_67534	chrXV_565236_A_G_67534	chrXV_565236_A_G	chrXV_565236_A_G	chrXV_565236_A_G	-0.841822	0.605928	chrXV	1.29707e-214	chrXV_565236_A_G chrXV_565236_A_G chrXV_565236_A_G chrXV_565236_A_G	3043	TRUE	chrXV	564154	565236	1083	*	FALSE	0.786859	chrXV_565236_A_G	Congo_Red;75ug/mL;3	0.0001	0.000100005	349.256	chrXV_565236_A_G_80089	chrXV_565236_A_G_80089	chrXV_566820_A_T_80103	chrXV_565236_A_G	chrXV_565236_A_G
Lactate;;1	YOR128C	ADE2	chrXV	564334	566533	2200	-	0.993464	CLIB219x	decrease	0.000766207	0.973856	chrXV_565236_A_G				0.0001	0.000100005	101.001	chrXV_565236_A_G_67534	chrXV_564154_C_G_67527	chrXV_565236_A_G_67534	chrXV_565236_A_G	chrXV_564154_C_G	chrXV_565236_A_G	-0.625662	0.18623	chrXV	8.57956e-104	chrXV_564154_C_G chrXV_564229_G_A chrXV_565236_A_G chrXV_565236_A_G	3043	TRUE	chrXV	564154	565236	1083	*	FALSE	0.547124	chrXV_565236_A_G	Lactate;;1	0.0001	0.000100005	186.624	chrXV_565236_A_G_80089	chrXV_565236_A_G_80089	chrXV_566820_A_T_80103	chrXV_565236_A_G	chrXV_565236_A_G
Raffinose;;1	YIL163C		chrIX	35792	37317	1526	-	0.993326	YJM981x	decrease	0.000840983	0.991786	chrIX_37201_C_CTTTT,CTTTTT,CT				0.0003	0.000150015	22.7901	chrIX_37170_T_C_16741	chrIX_37068_T_C_16739	chrIX_37222_T_A_16743	chrIX_37170_T_C	chrIX_37068_T_C	chrIX_37222_T_A	-0.350047	0.0453065	chrIX	1.79577e-24	chrIX_35291_CAAA_C chrIX_35958_C_T chrIX_37170_T_C chrIX_37170_T_C	3003	TRUE	chrIX	8583	37222	28640	*	FALSE	0.180157	chrIX_37170_T_C	Raffinose;;1	0.0001	0.000100005	50.7415	chrIX_37723_G_C,T_37319	chrIX_8317_T_C_37083	chrIX_39475_G_A_37344	chrIX_37723_G_C,T	chrIX_8317_T_C
EGTA;5mM;3	YOL121C	RPS19A	chrXV	91722	93121	1400	-	0.993311	Y10x	increase	0.000914077	0.915491	chrXV_92179_A_G				0.0001	0.000100005	22.8373	chrXV_93102_G_A_60838	chrXV_91676_T_G_60828	chrXV_95822_G_A_60856	chrXV_93102_G_A	chrXV_91676_T_G	chrXV_95822_G_A	0.243656	0.0629356	chrXV	3.57766e-24	chrXV_90483_A_C chrXV_91676_T_G chrXV_96524_C_T chrXV_98921_G_A	3000	TRUE	chrXV	91676	100113	8438	*	FALSE	0.243712	chrXV_93102_G_A	EGTA;5mM;3	0.0001	0.000100005	38.7673	chrXV_92179_A_G_80318	chrXV_92179_A_G_80318	chrXV_92185_C_T_80319	chrXV_92179_A_G	chrXV_92179_A_G
Cadmium_Chloride;75uM;2	YGL071W	AFT1	chrVII	371687	374270	2584	+	0.992733	YPS1009x	decrease	0.000992506	0.79065	chrVII_373815_G_T				0.0001	0.000100005	24.3234	chrVII_373815_G_T_26858	chrVII_365934_T_C_26819	chrVII_384425_T_C_26914	chrVII_373815_G_T	chrVII_365934_T_C	chrVII_384425_T_C	-0.226341	0.0750656	chrVII	1.59393e-16	chrVII_368110_A_C chrVII_370897_G_T chrVII_375868_C_T chrVII_377024_C_T	3008	TRUE	chrVII	360004	379330	19327	*	FALSE	0.263749	chrVII_373815_G_T	Cadmium_Chloride;75uM;2	0.0001	0.000100005	45.8411	chrVII_373815_G_T_30715	chrVII_373815_G_T_30715	chrVII_374189_T_C_30718	chrVII_373815_G_T	chrVII_373815_G_T
Glycerol;;1	YKL038W	RGT1	chrXI	364899	369240	4342	+	0.992468	CLIB219x	decrease	0.00107225	0.223328	chrXI_367187_TC_T				0.0001	0.000100005	18.5805	chrXI_367187_TC_T_53337	chrXI_360927_C_T_53264	chrXI_368622_G_A,T_53357	chrXI_367187_TC_T	chrXI_360927_C_T	chrXI_368622_G_A,T	0.177619	0.0333768	chrXI	5.75586e-21	chrXI_358378_A_T chrXI_360932_C_T chrXI_369878_C_T chrXI_371457_GT_GTT,G,GTTT	3028	TRUE	chrXI	347287	370412	23126	*	FALSE	0.0560413	chrXI_367187_TC_T	Glycerol;;1	0.0001	0.000100005	24.8646	chrXI_366857_C_T_44430	chrXI_365209_G_A_44417	chrXI_371063_C_T_44453	chrXI_366857_C_T	chrXI_365209_G_A
YPD;;1	YOL154W	ZPS1	chrXV	33132	38076	4945	+	0.992248	Y10x	decrease	0.00115273	0.379845	chrXV_34557_A_G				0.0001	0.000100005	38.9046	chrXV_34362_A_G_60591	chrXV_293_T_A_60378	chrXV_37321_A_G_60614	chrXV_34362_A_G	chrXV_293_T_A	chrXV_37321_A_G	-0.345977	0.12581	chrXV	5.70272e-40	chrXV_2487_G_T chrXV_11114_T_C chrXV_36505_TAC_T chrXV_37107_C_T,A	3000	TRUE	chrXV	2487	34753	32267	*	FALSE	0.047523	chrXV_34362_A_G	YPD;;1	0.0001	0.000100005	23.5774	chrXV_46390_C_T_79710	chrXV_37545_G_A_79144	chrXV_46436_CGT_C_79713	chrXV_46390_C_T	chrXV_37545_G_A
YNB;ph3;1	YPL028W	ERG10	chrXVI	497907	499477	1571	+	0.991421	YJM981x	decrease	0.00124114	0.991421	chrXVI_499090_A_G				0.0001	0.000100005	25.4175	chrXVI_498689_C_T_75243	chrXVI_496807_G_A_75238	chrXVI_502088_C_A_75274	chrXVI_498689_C_T	chrXVI_496807_G_A	chrXVI_502088_C_A	-0.266608	0.0724331	chrXVI	9.86983e-28	chrXVI_496807_G_A chrXVI_497347_G_A chrXVI_500000_G_A chrXVI_500408_A_T	3004	TRUE	chrXVI	496807	502084	5278	*	FALSE	0.423154	chrXVI_498689_C_T	YNB;ph3;1	0.0001	0.000100005	43.4257	chrXVI_499090_A_G_36582	chrXVI_499090_A_G_36582	chrXVI_499090_A_G_36582	chrXVI_499090_A_G	chrXVI_499090_A_G
Manganese_Sulfate;;1	YGR233C	PHO81	chrVII	954660	959056	4397	-	0.991406	Y10x	increase	0.00132764	0.271094	chrVII_955691_A_C				0.0001	0.000100005	54.0632	chrVII_955691_A_C_29052	chrVII_948861_T_C_28979	chrVII_955721_C_T_29054	chrVII_955691_A_C	chrVII_948861_T_C	chrVII_955721_C_T	0.298747	0.125936	chrVII	1.12054e-54	chrVII_953569_T_A chrVII_953964_C_CTAA chrVII_956708_G_A chrVII_957005_A_T	3000	TRUE	chrVII	953314	957005	3692	*	FALSE	0.235894	chrVII_955691_A_C	Manganese_Sulfate;;1	0.0001	0.000100005	47.416	chrVII_955246_G_C_38537	chrVII_949251_CTATATATATATATA_CTATATATATA,CTATA,CTATATATATATATATATA,C,CTATATATATATACATATATATATATATA,CTA_38486	chrVII_963268_C_T_38622	chrVII_955246_G_C	chrVII_949251_CTATATATATATATA_CTATATATATA,CTATA,CTATATATATATATATATA,C,CTATATATATATACATATATATATATATA,CTA
Sorbitol;1.5M;2	YBR140C	IRA1	chrII	517270	526825	9556	-	0.991003	Y10x	decrease	0.00141682	0.187661	chrII_517425_C_A				0.0001	0.000100005	38.1769	chrII_525429_C_T_6658	chrII_512678_A_G_6470	chrII_525633_A_G_6664	chrII_525429_C_T	chrII_512678_A_G	chrII_525633_A_G	-0.407307	0.128237	chrII	1.57863e-38	chrII_525181_T_A chrII_525290_T_C chrII_525510_G_A chrII_526731_C_G	3001	TRUE	chrII	514335	527211	12877	*	FALSE	0.447439	chrII_525429_C_T	Sorbitol;1.5M;2	0.0001	0.000100005	49.1986	chrII_516986_G_A_4664	chrII_516986_G_A_4664	chrII_531481_A_T_4729	chrII_516986_G_A	chrII_516986_G_A
Magnesium_Chloride;;1	YNL139C	THO2	chrXIV	360924	365874	4951	-	0.989305	YJM145x	decrease	0.00152347	0.619924	chrXIV_364987_G_A				0.0001	0.000100005	18.5645	chrXIV_364987_G_A_42756	chrXIV_360781_G_A_42728	chrXIV_366593_A_C_42762	chrXIV_364987_G_A	chrXIV_360781_G_A	chrXIV_366593_A_C	-0.259213	0.059206	chrXIV	3.67272e-20	chrXIV_356568_T_G chrXIV_359147_G_A chrXIV_366762_A_G chrXIV_367502_A_G	377	TRUE	chrXIV	358364	368706	10343	*	FALSE	0.230926	chrXIV_364987_G_A	Magnesium_Chloride;;1	0.0001	0.000100005	36.9532	chrXIV_364317_A_T_54858	chrXIV_363393_T_A,G_54854	chrXIV_364987_G_A_54861	chrXIV_364317_A_T	chrXIV_363393_T_A,G
Fluconazole;100uM;2	YPR064W		chrXVI	678635	679530	896	+	0.988862	YJM454a	increase	0.00163272	0.675497	chrXVI_679448_GTT_GTTTT,GT,GTTTTT,GTTTTTTTTT,G				0.0001	0.000100005	12.1619	chrXVI_679389_C_T_76423	chrXVI_676743_C_T_76404	chrXVI_681419_G_A_76432	chrXVI_679389_C_T	chrXVI_676743_C_T	chrXVI_681419_G_A	-0.195807	0.0335728	chrXVI	3.51221e-13	chrXVI_672668_C_T chrXVI_674654_G_A chrXVI_690907_A_G chrXVI_692589_G_A	3008	TRUE	chrXVI	662154	692167	30014	*	FALSE	0.141479	chrXVI_679389_C_T	Fluconazole;100uM;2	0.0001	0.000100005	90.3189	chrXVI_679272_CG_C_57189	chrXVI_678874_T_C_57188	chrXVI_679448_GTT_GTTTT,GT,GTTTTT,GTTTTTTTTT,G_57190	chrXVI_679272_CG_C	chrXVI_678874_T_C
YPD;15;1	YDR246W	TRS23	chrIV	954134	955039	906	+	0.988652	273614xa	decrease	0.00174188	0.988652	chrIV_954920_C_CA				0.0001	0.000100005	33.3736	chrIV_954920_C_CA_7352	chrIV_954920_C_CA_7352	chrIV_955620_A_C_7354	chrIV_954920_C_CA	chrIV_954920_C_CA	chrIV_955620_A_C	0.367761	0.067517	chrIV	6.60513e-36	chrIV_954920_C_CA chrIV_954920_C_CA chrIV_955620_A_C chrIV_955620_A_C	3003	TRUE	chrIV	954920	955222	303	*	FALSE	0.708738	chrIV_954920_C_CA	YPD;15;1	0.0001	0.000100005	24.9842	chrIV_954985_A_C_16374	chrIV_953693_T_C_16363	chrIV_956987_G_A_16388	chrIV_954985_A_C	chrIV_953693_T_C
Cadmium_Chloride;75uM;2	YOR043W	WHI2	chrXV	410265	412667	2403	+	0.988384	CLIB219x	decrease	0.00185159	0.602765	chrXV_411842_A_AC				0.0001	0.000100005	89.7147	chrXV_412177_C_T_78793	chrXV_411579_G_A_78789	chrXV_418280_GA_G_78860	chrXV_412177_C_T	chrXV_411579_G_A	chrXV_418280_GA_G	0.322166	0.0926985	chrXV	7.39314e-91	chrXV_410684_C_T chrXV_411579_G_A chrXV_412613_G_T chrXV_413669_G_A	3028	TRUE	chrXV	410064	414582	4519	*	FALSE	0.264731	chrXV_412177_C_T	Cadmium_Chloride;75uM;2	0.0001	0.000100005	155.993	chrXV_411842_A_AC_66522	chrXV_411842_A_AC_66522	chrXV_412177_C_T_66524	chrXV_411842_A_AC	chrXV_411842_A_AC
Manganese_Sulfate;;1	YBR140C	IRA1	chrII	517270	526825	9556	-	0.9879	Y10x	increase	0.00196422	0.391242	chrII_523878_A_G				0.0001	0.000100005	21.7436	chrII_523878_A_G_6632	chrII_515871_G_A_6518	chrII_525510_G_A_6661	chrII_523878_A_G	chrII_515871_G_A	chrII_525510_G_A	0.20656	0.0320565	chrII	5.13389e-23	chrII_512775_C_T chrII_515569_A_C chrII_526731_C_G chrII_530272_A_G	3001	TRUE	chrII	510763	527211	16449	*	FALSE	0.113318	chrII_523878_A_G	Manganese_Sulfate;;1	0.0001	0.000100005	21.8345	chrII_525460_C_T_4688	chrII_522849_C_A_4677	chrII_531256_C_T_4728	chrII_525460_C_T	chrII_522849_C_A
Diamide;1.5mM;3	YBR140C	IRA1	chrII	517270	526825	9556	-	0.986604	Y10x	decrease	0.00208847	0.167913	chrII_520206_C_T				0.0001	0.000100005	13.4983	chrII_518655_G_C_4668	chrII_508385_T_A_4630	chrII_533330_T_A_4762	chrII_518655_G_C	chrII_508385_T_A	chrII_533330_T_A	-0.20239	0.0357086	chrII	6.15063e-16	chrII_505510_TCC_T chrII_513994_A_G chrII_538483_A_G chrII_541025_A_C	3000	TRUE	chrII	506715	533745	27031	*	FALSE	0.0718563	chrII_518655_G_C	Diamide;1.5mM;3	0.0001	0.000100005	18.4269	chrII_520657_T_C_6584	chrII_517214_C_G_6539	chrII_527601_G_A_6688	chrII_520657_T_C	chrII_517214_C_G
Galactose;;1	YBR021W	FUR4	chrII	281025	283540	2516	+	0.98606	CLIB413a	decrease	0.0022159	0.98606	chrII_281139_G_GA				0.0001	0.000100005	29.3426	chrII_280091_T_C_3062	chrII_279162_G_T_3058	chrII_287113_G_A_3086	chrII_280091_T_C	chrII_279162_G_T	chrII_287113_G_A	0.29326	0.0928955	chrII	5.23637e-31	chrII_277912_A_G chrII_277912_A_G chrII_283729_G_C chrII_286327_G_A	377	TRUE	chrII	277912	281251	3340	*	FALSE	0.197689	chrII_280091_T_C	Galactose;;1	0.0001	0.000100005	228.379	chrII_281139_G_GA_3711	chrII_279444_G_C_3700	chrII_281430_A_T,AAGTG_3713	chrII_281139_G_GA	chrII_279444_G_C
YNB;ph8;1	YDR246W	TRS23	chrIV	954134	955039	906	+	0.984585	273614xa	decrease	0.00235632	0.984585	chrIV_954920_C_CA				0.0001	0.000100005	20.3441	chrIV_954920_C_CA_7352	chrIV_953287_C_G_7351	chrIV_955986_GAAAAA_G,GA,GAAA,GAAAA,GAA,GAAAAAA_7356	chrIV_954920_C_CA	chrIV_953287_C_G	chrIV_955986_GAAAAA_G,GA,GAAA,GAAAA,GAA,GAAAAAA	0.296243	0.0412819	chrIV	1.13123e-22	chrIV_953287_C_G chrIV_954920_C_CA chrIV_955831_C_T chrIV_955831_C_T	3003	TRUE	chrIV	954920	955620	701	*	FALSE	0.626016	chrIV_954920_C_CA	YNB;ph8;1	0.0001	0.000100005	29.9703	chrIV_954985_A_C_16374	chrIV_954022_C_T_16364	chrIV_955955_G_A_16386	chrIV_954985_A_C	chrIV_954022_C_T
Diamide;1.5mM;3	YOL154W	ZPS1	chrXV	33132	38076	4945	+	0.982801	Y10x	decrease	0.00251256	0.348894	chrXV_34362_A_G				0.0001	0.000100005	23.7121	chrXV_37611_A_G_79151	chrXV_37441_A_T_79132	chrXV_46436_CGT_C_79713	chrXV_37611_A_G	chrXV_37441_A_T	chrXV_46436_CGT_C	-0.312575	0.127084	chrXV	3.02232e-23	chrXV_34557_A_G chrXV_36873_T_G chrXV_47227_A_G chrXV_49106_T_G	3001	TRUE	chrXV	33080	48275	15196	*	FALSE	0.170121	chrXV_37611_A_G	Diamide;1.5mM;3	0.0001	0.000100005	49.3374	chrXV_34362_A_G_60591	chrXV_293_T_A_60378	chrXV_37107_C_T,A_60613	chrXV_34362_A_G	chrXV_293_T_A
Formamide;2%;2	YOR125C	CAT5	chrXV	558836	559845	1010	-	0.982674	YJM145x	increase	0.00266687	0.515947	chrXV_559546_G_A				0.0001	0.000100005	12.2237	chrXV_559546_G_A_47023	chrXV_558913_G_C_47018	chrXV_561027_GA_G_47031	chrXV_559546_G_A	chrXV_558913_G_C	chrXV_561027_GA_G	0.243587	0.0562691	chrXV	7.79245e-14	chrXV_551019_A_G chrXV_552775_C_G chrXV_573442_C_T chrXV_578986_T_C	377	TRUE	chrXV	534542	568707	34166	*	FALSE	0.181589	chrXV_559546_G_A	Formamide;2%;2	0.0001	0.000100005	37.9957	chrXV_559459_T_C_61134	chrXV_555652_T_C_61128	chrXV_568494_A_G_61173	chrXV_559459_T_C	chrXV_555652_T_C
Galactose;;1	YNL132W	KRE33	chrXIV	375006	378628	3623	+	0.9824	RMx	decrease	0.00282082	0.420129	chrXIV_376432_T_G				0.0482	0.0318353	5.59427	chrXIV_376070_G_A_65238	chrXIV_367370_T_C_65180	chrXIV_393022_T_C_65339	chrXIV_376070_G_A	chrXIV_367370_T_C	chrXIV_393022_T_C	0.163573	0.0200074	chrXIV	7.12831e-08	chrXIV_363057_G_A chrXIV_367520_A_G chrXIV_391961_C_T chrXIV_394023_C_G	376	TRUE	chrXIV	367370	389979	22610	*	FALSE	0.056338	chrXIV_376070_G_A	Galactose;;1	0.0001	0.000100005	43.0634	chrXIV_376313_C_T_40938	chrXIV_376313_C_T_40938	chrXIV_377751_G_A_40944	chrXIV_376313_C_T	chrXIV_376313_C_T
Galactose;;1	YOR128C	ADE2	chrXV	564334	566533	2200	-	0.98224	CLIB219x	decrease	0.00297326	0.929199	chrXV_565236_A_G				0.0001	0.000100005	168.349	chrXV_565236_A_G_67534	chrXV_565236_A_G_67534	chrXV_565236_A_G_67534	chrXV_565236_A_G	chrXV_565236_A_G	chrXV_565236_A_G	-0.653747	0.443031	chrXV	1.53035e-168	chrXV_564154_C_G chrXV_565236_A_G chrXV_565236_A_G chrXV_565236_A_G	3043	TRUE	chrXV	564154	566301	2148	*	FALSE	0.871087	chrXV_565236_A_G	Galactose;;1	0.0001	0.000100005	342.116	chrXV_565236_A_G_80089	chrXV_565236_A_G_80089	chrXV_566820_A_T_80103	chrXV_565236_A_G	chrXV_565236_A_G
EtOH_Glucose;;1	YOR125C	CAT5	chrXV	558836	559845	1010	-	0.98188	BYa	decrease	0.00312626	0.352817	chrXV_559714_T_A				0.0001	0.000100005	18.3459	chrXV_558912_C_T_45895	chrXV_555451_A_G_45884	chrXV_587077_G_A_46046	chrXV_558912_C_T	chrXV_555451_A_G	chrXV_587077_G_A	0.303843	0.0340107	chrXV	3.04672e-20	chrXV_554076_G_A chrXV_555451_A_G chrXV_559714_T_A chrXV_563727_C_T	A	TRUE	chrXV	551813	569259	17447	*	FALSE	0.254299	chrXV_558912_C_T	EtOH_Glucose;;1	0.0001	0.000100005	20.8629	chrXV_559714_T_A_46188	chrXV_558913_G_C_46183	chrXV_563008_G_A_46207	chrXV_559714_T_A	chrXV_558913_G_C
Paraquat;0.75mM;3	YOR043W	WHI2	chrXV	410265	412667	2403	+	0.978835	CLIB219x	decrease	0.00330665	0.884122	chrXV_412177_C_T				0.0001	0.000100005	35.0758	chrXV_412177_C_T_78793	chrXV_406687_A_G_78747	chrXV_414324_T_C_78817	chrXV_412177_C_T	chrXV_406687_A_G	chrXV_414324_T_C	0.215097	0.0815748	chrXV	6.20451e-34	chrXV_406857_T_C chrXV_408572_A_G chrXV_418384_A_C chrXV_420262_C_T	3028	TRUE	chrXV	406687	418551	11865	*	FALSE	0.0909639	chrXV_412177_C_T	Paraquat;0.75mM;3	0.0001	0.000100005	122.517	chrXV_412111_T_C_66523	chrXV_410166_G_A_66514	chrXV_412177_C_T_66524	chrXV_412111_T_C	chrXV_410166_G_A
Cadmium_Chloride;75uM;2	YGR028W	MSP1	chrVII	541764	543421	1658	+	0.977794	CLIB413a	increase	0.00349377	0.425181	chrVII_541987_T_C				0.0001	0.000100005	79.7076	chrVII_542100_G_A_29964	chrVII_541987_T_C_29962	chrVII_542100_G_A_29964	chrVII_542100_G_A	chrVII_541987_T_C	chrVII_542100_G_A	-0.330003	0.102403	chrVII	2.66616e-80	chrVII_532330_T_C chrVII_532771_G_A chrVII_543031_G_C chrVII_544214_T_C	393	TRUE	chrVII	532330	543488	11159	*	FALSE	0.380319	chrVII_542100_G_A	Cadmium_Chloride;75uM;2	0.0001	0.000100005	42.4093	chrVII_541923_G_T_18868	chrVII_533328_A_G_18855	chrVII_544465_C_T_18883	chrVII_541923_G_T	chrVII_533328_A_G
Paraquat;0.75mM;3	YOR071C	NRT1	chrXV	458650	461388	2739	-	0.977739	BYa	increase	0.00367776	0.369317	chrXV_460430_A_T				0.0001	0.000100005	19.8268	chrXV_459840_G_A_45144	chrXV_456978_G_A_45130	chrXV_461696_G_C_45157	chrXV_459840_G_A	chrXV_456978_G_A	chrXV_461696_G_C	-0.162555	0.0215499	chrXV	2.99958e-21	chrXV_456978_G_A chrXV_457470_A_G chrXV_463462_G_A chrXV_466340_A_G	A	TRUE	chrXV	447362	463642	16281	*	FALSE	0.147059	chrXV_459840_G_A	Paraquat;0.75mM;3	0.0001	0.000100005	30.8017	chrXV_460848_T_A_45478	chrXV_458453_G_A_45466	chrXV_461473_C_T_45482	chrXV_460848_T_A	chrXV_458453_G_A
Caffeine;15mM;2	YNL085W	MKT1	chrXIV	466886	469837	2952	+	0.97772	BYa	increase	0.00385836	0.861441	chrXIV_467219_A_G				0.0001	0.000100005	79.3195	chrXIV_466588_T_G_41198	chrXIV_466103_G_A_41197	chrXIV_469870_A_G_41203	chrXIV_466588_T_G	chrXIV_466103_G_A	chrXIV_469870_A_G	-0.345296	0.126477	chrXIV	1.18015e-87	chrXIV_466103_G_A chrXIV_466103_G_A chrXIV_466588_T_G chrXIV_468488_A_G	A	TRUE	chrXIV	466588	467219	632	*	FALSE	0.316312	chrXIV_466588_T_G	Caffeine;15mM;2	0.0001	0.000100005	133.452	chrXIV_467219_A_G_41540	chrXIV_467219_A_G_41540	chrXIV_467219_A_G_41540	chrXIV_467219_A_G	chrXIV_467219_A_G
Lithium_Chloride;100mM;2	YKR093W	PTR2	chrXI	614807	617764	2958	+	0.977717	BYa	increase	0.00403552	0.149531	chrXI_616713_T_C				0.0001	0.000100005	39.4609	chrXI_614931_C_T_31376	chrXI_613340_A_G,AGAG_31346	chrXI_617158_T_G_31399	chrXI_614931_C_T	chrXI_613340_A_G,AGAG	chrXI_617158_T_G	-0.190031	0.0289147	chrXI	3.37118e-42	chrXI_613535_A_G chrXI_613616_A_G chrXI_616902_A_G,T chrXI_618691_T_TA,*	A	TRUE	chrXI	613340	621359	8020	*	FALSE	0.0991333	chrXI_614931_C_T	Lithium_Chloride;100mM;2	0.0001	0.000100005	23.2397	chrXI_616713_T_C_31809	chrXI_615148_C_T_31789	chrXI_618029_G_A_31818	chrXI_616713_T_C	chrXI_615148_C_T
Lactate;;1	YOR043W	WHI2	chrXV	410265	412667	2403	+	0.977706	CLIB219x	increase	0.00420941	0.223257	chrXV_412487_A_G				0.0001	0.000100005	42.1573	chrXV_412177_C_T_78793	chrXV_412177_C_T_78793	chrXV_412559_T_C_78801	chrXV_412177_C_T	chrXV_412177_C_T	chrXV_412559_T_C	-0.271349	0.0653988	chrXV	2.09152e-43	chrXV_408572_A_G chrXV_409138_G_T chrXV_416019_T_C chrXV_418897_A_G	3028	TRUE	chrXV	408572	416186	7615	*	FALSE	0.151079	chrXV_412177_C_T	Lactate;;1	0.0001	0.000100005	56.7924	chrXV_412487_A_G_66525	chrXV_410166_G_A_66514	chrXV_418447_T_C_66557	chrXV_412487_A_G	chrXV_410166_G_A
EtOH_Glucose;;1	YIR020W-A		chrIX	394737	396186	1450	+	0.976538	YPS1009x	decrease	0.00439104	0.239863	chrIX_396045_T_G				0.0001	0.000100005	49.3861	chrIX_396045_T_G_37644	chrIX_389094_G_T_37535	chrIX_397800_C_T_37687	chrIX_396045_T_G	chrIX_389094_G_T	chrIX_397800_C_T	-0.370318	0.154747	chrIX	2.27553e-49	chrIX_395148_TTTTATTCATAATACCC_T chrIX_395693_T_C chrIX_396307_C_A chrIX_396836_G_A	3008	TRUE	chrIX	393831	397800	3970	*	FALSE	0.238289	chrIX_396045_T_G	EtOH_Glucose;;1	0.0001	0.000100005	72.0029	chrIX_394958_CT_C_43710	chrIX_394553_G_A_43698	chrIX_396307_C_A_43740	chrIX_394958_CT_C	chrIX_394553_G_A
Manganese_Sulfate;;1	YOL060C	MAM3	chrXV	213875	216630	2756	-	0.975949	M22	increase	0.00457478	0.251409	chrXV_214604_G_A				0.0001	0.000100005	10.0136	chrXV_216181_C_CAGCAATACTAGAGAATGCGGAAGCAACAGCAGT,CAGCAATACTAGAGAATGCGGAAGCAGCAGCAGT,CAGCAATACTAGAGAATGCGAAAGCAGCAGCAGT,CAGCAATACTAAAGAATGCGGAAGCAACAGCAGT_44333	chrXV_200339_NA_DUP_44228	chrXV_221075_G_C_44351	chrXV_216181_C_CAGCAATACTAGAGAATGCGGAAGCAACAGCAGT,CAGCAATACTAGAGAATGCGGAAGCAGCAGCAGT,CAGCAATACTAGAGAATGCGAAAGCAGCAGCAGT,CAGCAATACTAAAGAATGCGGAAGCAACAGCAGT	chrXV_200339_NA_DUP	chrXV_221075_G_C	0.172544	0.0567477	chrXV	1.02416e-11	chrXV_206268_A_G chrXV_210619_G_A chrXV_218455_TCC_TCCC,T,TCCCCCCC chrXV_220341_G_A	375	TRUE	chrXV	214070	218547	4478	*	FALSE	0.126741	chrXV_216181_C_CAGCAATACTAGAGAATGCGGAAGCAACAGCAGT,CAGCAATACTAGAGAATGCGGAAGCAGCAGCAGT,CAGCAATACTAGAGAATGCGAAAGCAGCAGCAGT,CAGCAATACTAAAGAATGCGGAAGCAACAGCAGT	Manganese_Sulfate;;1	0.0001	0.000100005	49.7051	chrXV_214604_G_A_77339	chrXV_213212_A_G_77327	chrXV_215496_C_G_77348	chrXV_214604_G_A	chrXV_213212_A_G
YNB;ph8;1	YOR125C	CAT5	chrXV	558836	559845	1010	-	0.974378	YJM145x	decrease	0.00476967	0.477894	chrXV_559477_T_C				0.0001	0.000100005	10.248	chrXV_559477_T_C_47022	chrXV_551813_G_A_46990	chrXV_589865_A_AAT,ATT_47163	chrXV_559477_T_C	chrXV_551813_G_A	chrXV_589865_A_AAT,ATT	-0.212426	0.04509	chrXV	7.31436e-12	chrXV_550812_C_T chrXV_553950_C_T chrXV_573358_A_G chrXV_578986_T_C	377	TRUE	chrXV	550196	574821	24626	*	FALSE	0.208075	chrXV_559477_T_C	YNB;ph8;1	0.0001	0.000100005	20.0449	chrXV_559459_T_C_61134	chrXV_559459_T_C_61134	chrXV_568761_G_A_61174	chrXV_559459_T_C	chrXV_559459_T_C
Fluconazole;100uM;2	YOR153W	PDR5	chrXV	619064	624551	5488	+	0.974212	PW5a	decrease	0.00496249	0.464183	chrXV_622950_T_A				0.0001	0.000100005	17.179	chrXV_616321_T_C_84756	chrXV_608418_A_G_84708	chrXV_618351_G_GA_84779	chrXV_616321_T_C	chrXV_608418_A_G	chrXV_618351_G_GA	0.257148	0.0523121	chrXV	6.85007e-19	chrXV_608418_A_G chrXV_608982_C_T chrXV_621360_C_T chrXV_624798_A_T	3001	TRUE	chrXV	606531	621973	15443	*	FALSE	0.123701	chrXV_616321_T_C	Fluconazole;100uM;2	0.0001	0.000100005	120.01	chrXV_622413_A_G_72894	chrXV_622413_A_G_72894	chrXV_622950_T_A_72899	chrXV_622413_A_G	chrXV_622413_A_G
Xylose;;1	YOR128C	ADE2	chrXV	564334	566533	2200	-	0.972886	CLIB219x	decrease	0.00516388	0.897394	chrXV_565236_A_G				0.0001	0.000100005	119.478	chrXV_565236_A_G_67534	chrXV_564154_C_G_67527	chrXV_565236_A_G_67534	chrXV_565236_A_G	chrXV_564154_C_G	chrXV_565236_A_G	-0.685809	0.369537	chrXV	5.60018e-121	chrXV_564154_C_G chrXV_564229_G_A chrXV_565236_A_G chrXV_565236_A_G	3043	TRUE	chrXV	564154	566301	2148	*	FALSE	0.574939	chrXV_565236_A_G	Xylose;;1	0.0001	0.000100005	199.741	chrXV_565236_A_G_80089	chrXV_565236_A_G_80089	chrXV_566820_A_T_80103	chrXV_565236_A_G	chrXV_565236_A_G
EtOH;;1	YNL085W	MKT1	chrXIV	466886	469837	2952	+	0.972127	BYa	decrease	0.00536846	0.802099	chrXIV_467219_A_G				0.0001	0.000100005	61.3806	chrXIV_467219_A_G_41540	chrXIV_467219_A_G_41540	chrXIV_467219_A_G_41540	chrXIV_467219_A_G	chrXIV_467219_A_G	chrXIV_467219_A_G	0.409147	0.136051	chrXIV	3.25556e-62	chrXIV_466588_T_G chrXIV_467028_A_G chrXIV_467219_A_G chrXIV_468488_A_G	375	TRUE	chrXIV	467028	467219	192	*	FALSE	0.769084	chrXIV_467219_A_G	EtOH;;1	0.0001	0.000100005	140.603	chrXIV_466588_T_G_41198	chrXIV_466588_T_G_41198	chrXIV_467219_A_G_41200	chrXIV_466588_T_G	chrXIV_466588_T_G
Methotrexate;0.4mM;2	YOL145C	CTR9	chrXV	49501	52942	3442	-	0.970434	YJM454a	increase	0.00558451	0.143735	chrXV_50220_A_G				0.0001	0.000100005	21.953	chrXV_51799_C_A_65113	chrXV_46204_C_T,A_65067	chrXV_53283_A_G_65129	chrXV_51799_C_A	chrXV_46204_C_T,A	chrXV_53283_A_G	-0.261978	0.0862981	chrXV	1.93639e-23	chrXV_48470_G_C chrXV_49109_G_C chrXV_55275_C_T chrXV_56640_G_A	3008	TRUE	chrXV	44231	58899	14669	*	FALSE	0.149404	chrXV_51799_C_A	Methotrexate;0.4mM;2	0.0001	0.000100005	27.6819	chrXV_50220_A_G_48912	chrXV_49790_T_C_48910	chrXV_54997_C_T_48965	chrXV_50220_A_G	chrXV_49790_T_C
Neomycin;5mg/mL;2	YOL130W	ALR1	chrXV	73878	77268	3391	+	0.969666	YJM454a	decrease	0.00580353	0.384361	chrXV_75243_T_C				0.0001	0.000100005	79.5585	chrXV_74126_C_T_49092	chrXV_73503_T_A_49087	chrXV_77404_G_C,A_49135	chrXV_74126_C_T	chrXV_73503_T_A	chrXV_77404_G_C,A	0.342866	0.108299	chrXV	4.5327e-80	chrXV_72724_G_T chrXV_72724_G_T chrXV_76655_A_G chrXV_77697_C_T	381	TRUE	chrXV	73503	76700	3198	*	FALSE	0.0567164	chrXV_74126_C_T	Neomycin;5mg/mL;2	0.0001	0.000100005	88.5082	chrXV_75243_T_C_65307	chrXV_73589_T_C_65289	chrXV_79673_C_A_65366	chrXV_75243_T_C	chrXV_73589_T_C
YNB;;1	YPL091W	GLR1	chrXVI	375335	377121	1787	+	0.969582	YJM981x	increase	0.00601945	0.969582	chrXVI_376683_A_G				0.0372	0.00638543	11.5378	chrXVI_373674_G_A_36476	chrXVI_373674_G_A_36476	chrXVI_374422_C_T_36482	chrXVI_373674_G_A	chrXVI_373674_G_A	chrXVI_374422_C_T	0.250834	0.0257808	chrXVI	3.90843e-17	chrXVI_373674_G_A chrXVI_373674_G_A chrXVI_376683_A_G chrXVI_376683_A_G	3003	TRUE	chrXVI	373674	374282	609	*	FALSE	0.201593	chrXVI_373674_G_A	YNB;;1	0.0001	0.000100005	17.9228	chrXVI_376027_G_A_74494	chrXVI_375193_A_T_74488	chrXVI_378260_C_A,G_74505	chrXVI_376027_G_A	chrXVI_375193_A_T
Xylose;;1	YOL081W	IRA2	chrXV	170522	180432	9911	+	0.967924	YPS163a	increase	0.00624603	0.247104	chrXV_171983_A_G				0.0001	0.000100005	17.5009	chrXV_175512_C_T_58616	chrXV_170000_T_C_58588	chrXV_187590_T_C_58720	chrXV_175512_C_T	chrXV_170000_T_C	chrXV_187590_T_C	0.218458	0.0485393	chrXV	3.81911e-19	chrXV_163748_G_A chrXV_166007_A_G chrXV_185828_C_T chrXV_188321_C_T	B	TRUE	chrXV	164737	185566	20830	*	FALSE	0.040672	chrXV_175512_C_T	Xylose;;1	0.0001	0.000100005	20.209	chrXV_171973_T_C_69626	chrXV_169152_A_G_69601	chrXV_181654_AC_A_69718	chrXV_171973_T_C	chrXV_169152_A_G
Neomycin;5mg/mL;2	YPL092W	SSU1	chrXVI	373357	375334	1978	+	0.967285	M22	increase	0.00647421	0.95922	chrXVI_374061_A_G				0.0001	0.000100005	37.6447	chrXVI_374261_C_T_48464	chrXVI_374261_C_T_48464	chrXVI_379573_C_T_48501	chrXVI_374261_C_T	chrXVI_374261_C_T	chrXVI_379573_C_T	0.413211	0.0575008	chrXVI	2.16275e-39	chrXVI_373847_A_G chrXVI_373946_G_A chrXVI_378640_G_T chrXVI_378951_C_T	375	TRUE	chrXVI	373847	379018	5172	*	FALSE	0.3061	chrXVI_374261_C_T	Neomycin;5mg/mL;2	0.0001	0.000100005	98.7561	chrXVI_373699_GC_G_86334	chrXVI_373699_GC_G_86334	chrXVI_374377_A_G_86338	chrXVI_373699_GC_G	chrXVI_373699_GC_G
EtOH;;1	YIL119C	RPI1	chrIX	136381	138813	2433	-	0.966521	YJM454a	decrease	0.00670502	0.371179	chrIX_138203_A_G				0.0001	0.000100005	57.8141	chrIX_139426_G_A_26341	chrIX_134348_T_A_26313	chrIX_139466_T_A,C_26342	chrIX_139426_G_A	chrIX_134348_T_A	chrIX_139466_T_A,C	0.36319	0.132534	chrIX	4.92241e-60	chrIX_135577_A_G chrIX_137242_G_A chrIX_139426_G_A chrIX_140602_C_T	381	TRUE	chrIX	136954	140602	3649	*	FALSE	0.260287	chrIX_139426_G_A	EtOH;;1	0.0001	0.000100005	67.3142	chrIX_138051_G_A_35876	chrIX_136028_C_T_35845	chrIX_139426_G_A_35891	chrIX_138051_G_A	chrIX_136028_C_T
Magnesium_Chloride;;1	YOL154W	ZPS1	chrXV	33132	38076	4945	+	0.965517	Y10x	decrease	0.00694042	0.193103	chrXV_37321_A_G				0.0001	0.000100005	44.0571	chrXV_35414_C_T_60595	chrXV_293_T_A_60378	chrXV_37107_C_T,A_60613	chrXV_35414_C_T	chrXV_293_T_A	chrXV_37107_C_T,A	-0.344952	0.110169	chrXV	8.5886e-46	chrXV_34115_A_G chrXV_34557_A_G chrXV_36505_TAC_T chrXV_37059_A_G	3000	TRUE	chrXV	2487	37321	34835	*	FALSE	0.181381	chrXV_35414_C_T	Magnesium_Chloride;;1	0.0001	0.000100005	22.505	chrXV_37611_A_G_79151	chrXV_37485_C_T_79136	chrXV_46436_CGT_C_79713	chrXV_37611_A_G	chrXV_37485_C_T
Congo_Red;75ug/mL;3	YIL119C	RPI1	chrIX	136381	138813	2433	-	0.963004	YJM454a	decrease	0.00719299	0.172564	chrIX_138441_C_T				0.0001	0.000100005	38.9637	chrIX_136954_G_A_26324	chrIX_134734_A_G_26314	chrIX_139466_T_A,C_26342	chrIX_136954_G_A	chrIX_134734_A_G	chrIX_139466_T_A,C	0.331507	0.105349	chrIX	6.13992e-40	chrIX_130771_A_T chrIX_133368_C_T chrIX_138115_T_TA chrIX_139426_G_A	381	TRUE	chrIX	129293	139466	10174	*	FALSE	0.150923	chrIX_136954_G_A	Congo_Red;75ug/mL;3	0.0001	0.000100005	52.5699	chrIX_138441_C_T_35880	chrIX_137783_G_T_35874	chrIX_140742_T_C_35896	chrIX_138441_C_T	chrIX_137783_G_T
Paraquat;0.75mM;3	YLR214W	FRE1	chrXII	568244	570700	2457	+	0.962581	I14a	increase	0.00744488	0.841935	chrXII_570386_CA_C				0.0001	0.000100005	92.2927	chrXII_570386_CA_C_47247	chrXII_570032_G_A_47246	chrXII_570786_T_C_47250	chrXII_570386_CA_C	chrXII_570032_G_A	chrXII_570786_T_C	-0.405073	0.123727	chrXII	7.15187e-93	chrXII_570032_G_A chrXII_570032_G_A chrXII_570386_CA_C chrXII_571868_ATT_A	3000	TRUE	chrXII	570386	570786	401	*	FALSE	0.237057	chrXII_570386_CA_C	Paraquat;0.75mM;3	0.0001	0.000100005	170.675	chrXII_569709_C_T_58166	chrXII_569709_C_T_58166	chrXII_569709_C_T_58166	chrXII_569709_C_T	chrXII_569709_C_T
Cobalt_Chloride;2mM;2	YLR214W	FRE1	chrXII	568244	570700	2457	+	0.962513	I14a	decrease	0.00769316	0.579534	chrXII_570386_CA_C				0.0001	0.000100005	14.5019	chrXII_571665_G_C_47251	chrXII_563747_TA_T_47214	chrXII_572011_G_A_47258	chrXII_571665_G_C	chrXII_563747_TA_T	chrXII_572011_G_A	0.232604	0.0754079	chrXII	8.1128e-17	chrXII_561187_A_G chrXII_563476_TACACACACACAC_TACACAC,TACACACAC,TAC,T,TACAC chrXII_576339_A_T chrXII_578431_C_T	3000	TRUE	chrXII	564602	582033	17432	*	FALSE	0.122281	chrXII_571665_G_C	Cobalt_Chloride;2mM;2	0.0001	0.000100005	124.073	chrXII_569709_C_T_58166	chrXII_569709_C_T_58166	chrXII_570428_A_C,T_58170	chrXII_569709_C_T	chrXII_569709_C_T
Galactose;;1	YBR140C	IRA1	chrII	517270	526825	9556	-	0.961236	Y10x	decrease	0.00794784	0.134464	chrII_519288_G_A				0.0001	0.000100005	10.2047	chrII_526608_T_C,A_4694	chrII_496540_T_C_4548	chrII_535190_G_A_4775	chrII_526608_T_C,A	chrII_496540_T_C	chrII_535190_G_A	-0.171233	0.0311729	chrII	3.76505e-11	chrII_509108_T_C chrII_512481_T_C chrII_541458_GTCATCATCATCATCATCATCATCATCATCATCATCATCATCA_GTCATCATCA,GTCATCATCATCATCATCATCA,GTCATCATCATCATCA,GTCATCATCATCA,G,GTCATCATCATCATCATCATCATCA chrII_544678_T_TA	3000	TRUE	chrII	515488	539908	24421	*	FALSE	0.056872	chrII_526608_T_C,A	Galactose;;1	0.0001	0.000100005	19.9297	chrII_519792_A_G_6570	chrII_516872_C_T_6535	chrII_527601_G_A_6688	chrII_519792_A_G	chrII_516872_C_T
Glycerol;;1	YPL183C	RTT10	chrXVI	199435	202920	3486	-	0.961221	CLIB219x	decrease	0.0081985	0.450838	chrXVI_202819_T_C				0.0001	0.000100005	19.4253	chrXVI_202889_A_G_85251	chrXVI_202791_C_T_85249	chrXVI_202889_A_G_85251	chrXVI_202889_A_G	chrXVI_202791_C_T	chrXVI_202889_A_G	0.173119	0.0343911	chrXVI	5.4679e-20	chrXVI_202791_C_T chrXVI_202791_C_T chrXVI_202889_A_G chrXVI_202889_A_G	3028	TRUE	chrXVI	182784	203462	20679	*	FALSE	0.790698	chrXVI_202889_A_G	Glycerol;;1	0.0001	0.000100005	26.491	chrXVI_203409_T_A_71810	chrXVI_197059_C_T_71766	chrXVI_211066_G_A_71852	chrXVI_203409_T_A	chrXVI_197059_C_T
Sucrose;;1	YNL139C	THO2	chrXIV	360924	365874	4951	-	0.958717	YJM145x	decrease	0.00846532	0.490165	chrXIV_364987_G_A				0.0001	0.000100005	21.4254	chrXIV_363549_G_A_54855	chrXIV_354445_TGGAATGGTG_T_54770	chrXIV_367370_T_C_54879	chrXIV_363549_G_A	chrXIV_354445_TGGAATGGTG_T	chrXIV_367370_T_C	0.186781	0.0352146	chrXIV	3.11859e-22	chrXIV_356376_T_C chrXIV_357333_C_G chrXIV_368706_A_G chrXIV_369296_C_G	B	TRUE	chrXIV	357012	369591	12580	*	FALSE	0.097166	chrXIV_363549_G_A	Sucrose;;1	0.0001	0.000100005	19.4524	chrXIV_364987_G_A_42756	chrXIV_359506_T_G_42722	chrXIV_366593_A_C_42762	chrXIV_364987_G_A	chrXIV_359506_T_G
Sucrose;;1	YIL119C	RPI1	chrIX	136381	138813	2433	-	0.955542	YJM454a	decrease	0.00875325	0.384114	chrIX_137062_A_G				0.0001	0.000100005	21.1453	chrIX_141212_T_C_26348	chrIX_127218_G_A_26269	chrIX_141727_T_C_26353	chrIX_141212_T_C	chrIX_127218_G_A	chrIX_141727_T_C	0.245728	0.0572268	chrIX	3.65054e-22	chrIX_130771_A_T chrIX_135055_T_C chrIX_143414_T_C chrIX_144516_T_C	381	TRUE	chrIX	121243	146457	25215	*	FALSE	0.158046	chrIX_141212_T_C	Sucrose;;1	0.0001	0.000100005	51.5042	chrIX_137062_A_G_35858	chrIX_137062_A_G_35858	chrIX_140226_A_T_35894	chrIX_137062_A_G	chrIX_137062_A_G
Manganese_Sulfate;;1	YOL028C	YAP7	chrXV	270526	271685	1160	-	0.955218	YJM981x	decrease	0.0090392	0.935855	chrXV_270656_C_CT,T				0.0001	0.000100005	31.1148	chrXV_270656_C_CT,T_67586	chrXV_269919_C_T_67583	chrXV_270747_T_C_67588	chrXV_270656_C_CT,T	chrXV_269919_C_T	chrXV_270747_T_C	-0.345443	0.029498	chrXV	3.25421e-33	chrXV_269437_C_CGCTTCTTCATCTTCT,CGCTTCTTCATCTTCTGCTTCTTCATCTTCT chrXV_269919_C_T chrXV_271314_C_T chrXV_272235_G_A	3004	TRUE	chrXV	269437	271898	2462	*	FALSE	0.223624	chrXV_270656_C_CT,T	Manganese_Sulfate;;1	0.0001	0.000100005	33.434	chrXV_270656_C_CT,T_30883	chrXV_269919_C_T_30881	chrXV_271552_G_A_30885	chrXV_270656_C_CT,T	chrXV_269919_C_T
Lactate;;1	YIL119C	RPI1	chrIX	136381	138813	2433	-	0.955193	YJM454a	decrease	0.00932084	0.225555	chrIX_138203_A_G				0.0001	0.000100005	28.5766	chrIX_137242_G_A_26328	chrIX_131694_A_G_26299	chrIX_144594_C_T_26373	chrIX_137242_G_A	chrIX_131694_A_G	chrIX_144594_C_T	0.281517	0.0912643	chrIX	2.00215e-29	chrIX_126525_G_A chrIX_130771_A_T chrIX_139426_G_A chrIX_140960_A_T	381	TRUE	chrIX	132088	140910	8823	*	FALSE	0.121281	chrIX_137242_G_A	Lactate;;1	0.0001	0.000100005	45.8678	chrIX_138051_G_A_35876	chrIX_137530_T_C_35869	chrIX_139732_C_T_35892	chrIX_138051_G_A	chrIX_137530_T_C
YPD;15;1	YHL042W		chrVIII	15540	16754	1215	+	0.955159	M22	decrease	0.00959834	0.30997	chrVIII_16634_C_T				0.0001	0.0151226	15.4191	chrVIII_16671_A_G_20263	chrVIII_14130_G_C_20242	chrVIII_16906_A_C_20268	chrVIII_16671_A_G	chrVIII_14130_G_C	chrVIII_16906_A_C	-0.266191	0.0350521	chrVIII	3.51008e-17	chrVIII_15741_C_CTT,CTTT chrVIII_16403_G_A chrVIII_20294_G_T chrVIII_24674_C_T	375	TRUE	chrVIII	93	26179	26087	*	FALSE	0.116622	chrVIII_16671_A_G	YPD;15;1	0.0001	0.000100005	78.1945	chrVIII_15220_C_T_37138	chrVIII_15038_G_C_37136	chrVIII_29780_T_C_37278	chrVIII_15220_C_T	chrVIII_15038_G_C
YPD;;1	YOR125C	CAT5	chrXV	558836	559845	1010	-	0.954644	YJM145x	decrease	0.00987553	0.450478	chrXV_559546_G_A				0.0001	0.000100005	11.4405	chrXV_564575_C_T_47054	chrXV_556870_T_G_47007	chrXV_569825_C_T_47086	chrXV_564575_C_T	chrXV_556870_T_G	chrXV_569825_C_T	-0.268866	0.184182	chrXV	9.58325e-13	chrXV_557623_T_C chrXV_558953_G_A chrXV_569825_C_T chrXV_573378_A_G	377	TRUE	chrXV	556870	569529	12660	*	FALSE	0.297468	chrXV_564575_C_T	YPD;;1	0.0001	0.000100005	67.4874	chrXV_559459_T_C_61134	chrXV_559459_T_C_61134	chrXV_559768_T_G_61138	chrXV_559459_T_C	chrXV_559459_T_C
EGTA;5mM;3	YOR128C	ADE2	chrXV	564334	566533	2200	-	0.954146	CLIB219x	decrease	0.0101523	0.822164	chrXV_565236_A_G				0.0001	0.000100005	145.459	chrXV_565236_A_G_80089	chrXV_565236_A_G_80089	chrXV_566820_A_T_80103	chrXV_565236_A_G	chrXV_565236_A_G	chrXV_566820_A_T	0.54281	0.140385	chrXV	3.83438e-150	chrXV_565236_A_G chrXV_565236_A_G chrXV_566265_C_T chrXV_566265_C_T	3028	TRUE	chrXV	565236	566695	1460	*	FALSE	0.0661811	chrXV_565236_A_G	EGTA;5mM;3	0.0001	0.000100005	88.5497	chrXV_565236_A_G_67534	chrXV_564154_C_G_67527	chrXV_565236_A_G_67534	chrXV_565236_A_G	chrXV_564154_C_G
EtOH;;1	YOR124C	UBP2	chrXV	554697	558835	4139	-	0.953172	YJM145x	decrease	0.0104323	0.372608	chrXV_557623_T_C				0.0001	0.000100005	31.1758	chrXV_556870_T_G_47007	chrXV_552421_A_T_46993	chrXV_567367_C_T_47074	chrXV_556870_T_G	chrXV_552421_A_T	chrXV_567367_C_T	-0.228261	0.119964	chrXV	5.94576e-10	chrXV_550450_G_GT chrXV_553072_A_G chrXV_571079_T_C chrXV_573228_T_C	377	TRUE	chrXV	551813	569690	17878	*	FALSE	0.143692	chrXV_556870_T_G	EtOH;;1	0.0001	0.000100005	83.4512	chrXV_558497_G_A_61133	chrXV_557623_T_C_61131	chrXV_562468_A_G_61149	chrXV_558497_G_A	chrXV_557623_T_C
Manganese_Sulfate;;1	YGR233C	PHO81	chrVII	954660	959056	4397	-	0.95311	YPS163a	decrease	0.0107085	0.389585	chrVII_954681_T_C				0.0001	0.000100005	32.3819	chrVII_957005_A_T_32784	chrVII_953020_A_G_32731	chrVII_957266_G_A_32785	chrVII_957005_A_T	chrVII_953020_A_G	chrVII_957266_G_A	-0.234696	0.0522883	chrVII	7.32669e-33	chrVII_953020_A_G chrVII_953572_C_A chrVII_958076_T_C chrVII_959381_A_G	376	TRUE	chrVII	952375	960297	7923	*	FALSE	0.182927	chrVII_957005_A_T	Manganese_Sulfate;;1	0.0001	0.000100005	48.4796	chrVII_954681_T_C_28412	chrVII_954681_T_C_28412	chrVII_954681_T_C_28412	chrVII_954681_T_C	chrVII_954681_T_C
Glycerol;;1	YNL085W	MKT1	chrXIV	466886	469837	2952	+	0.952599	BYa	decrease	0.0109843	0.748215	chrXIV_467219_A_G				0.0001	0.000100005	26.4885	chrXIV_466588_T_G_41198	chrXIV_466103_G_A_41197	chrXIV_470844_A_G_41207	chrXIV_466588_T_G	chrXIV_466103_G_A	chrXIV_470844_A_G	0.243811	0.0758567	chrXIV	6.38825e-29	chrXIV_459665_G_A chrXIV_462478_C_T chrXIV_471767_A_G chrXIV_472584_G_C	A	TRUE	chrXIV	459665	473303	13639	*	FALSE	0.201762	chrXIV_466588_T_G	Glycerol;;1	0.0001	0.000100005	39.4624	chrXIV_467219_A_G_41540	chrXIV_467028_A_G_41539	chrXIV_468488_A_G_41541	chrXIV_467219_A_G	chrXIV_467028_A_G
Mannose;;1	YHL043W	ECM34	chrVIII	14586	15539	954	+	0.949853	YJM981x	decrease	0.0112766	0.784661	chrVIII_14636_A_G				0.0001	0.000100005	32.9611	chrVIII_14636_A_G_13686	chrVIII_988_C_T_13559	chrVIII_17359_A_T_13704	chrVIII_14636_A_G	chrVIII_988_C_T	chrVIII_17359_A_T	-0.500571	0.0370676	chrVIII	1.73127e-34	chrVIII_988_C_T chrVIII_988_C_T chrVIII_15239_A_G chrVIII_16634_C_T	3003	TRUE	chrVIII	988	14636	13649	*	FALSE	0.0225538	chrVIII_14636_A_G	Mannose;;1	0.0001	0.000100005	18.0684	chrVIII_19760_T_A,G_33338	chrVIII_16365_G_A_33303	chrVIII_19760_T_A,G_33338	chrVIII_19760_T_A,G	chrVIII_16365_G_A
YPD;;1	YBR140C	IRA1	chrII	517270	526825	9556	-	0.947747	Y10x	decrease	0.0115801	0.172436	chrII_520435_G_A				0.0001	0.000100005	11.501	chrII_521451_C_T_4674	chrII_516986_G_A_4664	chrII_535775_T_C_4777	chrII_521451_C_T	chrII_516986_G_A	chrII_535775_T_C	-0.178992	0.0291573	chrII	1.45703e-12	chrII_503085_C_G chrII_509291_T_C chrII_538507_A_G chrII_541025_A_C	3000	TRUE	chrII	500320	537829	37510	*	FALSE	0.0481928	chrII_521451_C_T	YPD;;1	0.0001	0.000100005	12.0658	chrII_520657_T_C_6584	chrII_513994_A_G_6485	chrII_537282_C_T_6832	chrII_520657_T_C	chrII_513994_A_G
Mannose;;1	YIL119C	RPI1	chrIX	136381	138813	2433	-	0.947745	YJM454a	decrease	0.0118792	0.28894	chrIX_138441_C_T				0.0001	0.000100005	38.5335	chrIX_139426_G_A_26341	chrIX_133928_A_G_26311	chrIX_141727_T_C_26353	chrIX_139426_G_A	chrIX_133928_A_G	chrIX_141727_T_C	0.327533	0.0951973	chrIX	1.36107e-38	chrIX_129729_C_T chrIX_132088_G_GGC chrIX_140602_C_T chrIX_141212_T_C	381	TRUE	chrIX	130771	141332	10562	*	FALSE	0.181171	chrIX_139426_G_A	Mannose;;1	0.0001	0.000100005	65.5628	chrIX_138441_C_T_35880	chrIX_138441_C_T_35880	chrIX_139426_G_A_35891	chrIX_138441_C_T	chrIX_138441_C_T
Cobalt_Chloride;2mM;2	YKL220C	FRE2	chrXI	8309	12854	4546	-	0.947522	I14a	decrease	0.0121756	0.219237	chrXI_10393_G_A				0.0001	0.000100005	12.6819	chrXI_12770_G_A_40024	chrXI_307_G_A_39911	chrXI_35758_T_C_40231	chrXI_12770_G_A	chrXI_307_G_A	chrXI_35758_T_C	0.194081	0.0414097	chrXI	2.82601e-14	chrXI_6246_C_G chrXI_8174_G_C chrXI_20476_A_G chrXI_22806_T_A	3000	TRUE	chrXI	307	27649	27343	*	FALSE	0.0361781	chrXI_12770_G_A	Cobalt_Chloride;2mM;2	0.0001	0.000100005	81.2144	chrXI_10393_G_A_49408	chrXI_9675_T_C_49406	chrXI_12868_T_C_49443	chrXI_10393_G_A	chrXI_9675_T_C
YPD;;1	YIR020W-A		chrIX	394737	396186	1450	+	0.9473	YPS1009x	decrease	0.0124692	0.268995	chrIX_395693_T_C				0.0001	0.000100005	18.9764	chrIX_395890_G_A_37643	chrIX_389094_G_T_37535	chrIX_397249_A_G_37684	chrIX_395890_G_A	chrIX_389094_G_T	chrIX_397249_A_G	-0.237004	0.0547421	chrIX	5.14772e-20	chrIX_385600_T_C chrIX_386988_G_A chrIX_398115_G_T chrIX_398516_G_T	3008	TRUE	chrIX	380756	398250	17495	*	FALSE	0.143689	chrIX_395890_G_A	YPD;;1	0.0001	0.000100005	31.8391	chrIX_394958_CT_C_43710	chrIX_392815_AGGTGTAGGCTTTTCCTTTGTGCATGAGGTAGTGGTTGGG_A_43659	chrIX_397575_C_T_43764	chrIX_394958_CT_C	chrIX_392815_AGGTGTAGGCTTTTCCTTTGTGCATGAGGTAGTGGTTGGG_A
Manganese_Sulfate;;1	YNL074C	MLF3	chrXIV	486622	488254	1633	-	0.945948	BYa	increase	0.0127684	0.601468	chrXIV_486859_T_A				0.0002	0.000112507	7.53805	chrXIV_487818_C_T_41575	chrXIV_483540_T_TA_41569	chrXIV_489876_C_T_41578	chrXIV_487818_C_T	chrXIV_483540_T_TA	chrXIV_489876_C_T	-0.132743	0.021261	chrXIV	1.09775e-09	chrXIV_479459_ATTTTTT_ATTTTT,ATTTTTTTT,ATTCTTTTTTTT,A chrXIV_480999_AC_ACC,CC,ACCCCCC,ACCCCCCC,A chrXIV_489876_C_T chrXIV_494911_T_C	375	TRUE	chrXIV	468488	502079	33592	*	FALSE	0.24611	chrXIV_487818_C_T	Manganese_Sulfate;;1	0.0001	0.000100005	19.7857	chrXIV_486859_T_A_41223	chrXIV_486859_T_A_41223	chrXIV_487935_C_T_41226	chrXIV_486859_T_A	chrXIV_486859_T_A
Magnesium_Chloride;;1	YPL092W	SSU1	chrXVI	373357	375334	1978	+	0.942916	M22	increase	0.0130849	0.934164	chrXVI_374061_A_G				0.0018	0.0993947	10.0881	chrXVI_373847_A_G_48461	chrXVI_373847_A_G_48461	chrXVI_375693_G_A_48470	chrXVI_373847_A_G	chrXVI_373847_A_G	chrXVI_375693_G_A	0.218062	0.0263736	chrXVI	1.59472e-12	chrXVI_373847_A_G chrXVI_373847_A_G chrXVI_380502_G_A chrXVI_382203_G_A	375	TRUE	chrXVI	373847	380527	6681	*	FALSE	0.191022	chrXVI_373847_A_G	Magnesium_Chloride;;1	0.0001	0.000100005	42.4572	chrXVI_373699_GC_G_86334	chrXVI_373699_GC_G_86334	chrXVI_381584_T_C_86387	chrXVI_373699_GC_G	chrXVI_373699_GC_G
Manganese_Sulfate;;1	YOR043W	WHI2	chrXV	410265	412667	2403	+	0.942535	CLIB219x	decrease	0.0133997	0.304019	chrXV_411842_A_AC				0.0001	0.000100005	51.6471	chrXV_412111_T_C_66523	chrXV_409510_T_C_66513	chrXV_414454_G_A_66540	chrXV_412111_T_C	chrXV_409510_T_C	chrXV_414454_G_A	-0.310888	0.124231	chrXV	1.0374e-52	chrXV_409510_T_C chrXV_410166_G_A chrXV_412675_ATTT_A,AT,ATT chrXV_414090_GT_G	3043	TRUE	chrXV	410166	412951	2786	*	FALSE	0.193277	chrXV_412111_T_C	Manganese_Sulfate;;1	0.0001	0.000100005	89.5887	chrXV_412613_G_T_78802	chrXV_409138_G_T_78776	chrXV_414324_T_C_78817	chrXV_412613_G_T	chrXV_409138_G_T
Trehalose;;1	YNL085W	MKT1	chrXIV	466886	469837	2952	+	0.941148	BYa	decrease	0.0137197	0.702504	chrXIV_467219_A_G				0.0001	0.000100005	37.2248	chrXIV_467219_A_G_41540	chrXIV_467028_A_G_41539	chrXIV_476709_GT_G_41557	chrXIV_467219_A_G	chrXIV_467028_A_G	chrXIV_476709_GT_G	0.35195	0.106468	chrXIV	4.33369e-39	chrXIV_466588_T_G chrXIV_466588_T_G chrXIV_468488_A_G chrXIV_470301_C_T	375	TRUE	chrXIV	466588	472580	5993	*	FALSE	0.566004	chrXIV_467219_A_G	Trehalose;;1	0.0001	0.000100005	78.5122	chrXIV_466588_T_G_41198	chrXIV_466588_T_G_41198	chrXIV_470844_A_G_41207	chrXIV_466588_T_G	chrXIV_466588_T_G
YPD;;1	YDR246W	TRS23	chrIV	954134	955039	906	+	0.940835	273614xa	decrease	0.0140375	0.940835	chrIV_954920_C_CA				0.0001	0.000100005	14.996	chrIV_953693_T_C_16363	chrIV_953287_C_G_16362	chrIV_1013066_T_C_16790	chrIV_953693_T_C	chrIV_953287_C_G	chrIV_1013066_T_C	0.206378	0.0318579	chrIV	1.03034e-16	chrIV_942662_G_A chrIV_948548_G_A chrIV_956987_G_A chrIV_957631_T_C,*	3049	TRUE	chrIV	945070	961872	16803	*	FALSE	0.111848	chrIV_953693_T_C	YPD;;1	0.0001	0.000100005	22.4819	chrIV_954920_C_CA_7352	chrIV_954920_C_CA_7352	chrIV_955986_GAAAAA_G,GA,GAAA,GAAAA,GAA,GAAAAAA_7356	chrIV_954920_C_CA	chrIV_954920_C_CA
Diamide;1.5mM;3	YIL166C		chrIX	28522	33141	4620	-	0.940002	YPS163a	decrease	0.0143567	0.146477	chrIX_32483_C_T,CT				0.0001	0.000100005	18.9261	chrIX_29700_A_T,C_32492	chrIX_70_C_CCACCACACCCACACCCACACACCCACACACACACACCCA_32378	chrIX_33820_A_G_32572	chrIX_29700_A_T,C	chrIX_70_C_CCACCACACCCACACCCACACACCCACACACACACACCCA	chrIX_33820_A_G	-0.190363	0.0248828	chrIX	4.14749e-22	chrIX_264_T_C chrIX_264_T_C chrIX_35685_G_A chrIX_36218_C_T	B	TRUE	chrIX	264	32693	32430	*	FALSE	0.0146575	chrIX_29700_A_T,C	Diamide;1.5mM;3	0.0001	0.000100005	15.5853	chrIX_32483_C_T,CT_37632	chrIX_8158_T_C_37474	chrIX_35983_C_T_37699	chrIX_32483_C_T,CT	chrIX_8158_T_C
Lithium_Chloride;100mM;2	YLR257W		chrXII	655632	660252	4621	+	0.937127	BYa	decrease	0.0146913	0.164205	chrXII_657181_A_C				0.0001	0.000100005	37.2602	chrXII_656891_G_A_33805	chrXII_656891_G_A_33805	chrXII_657926_GTTT_GTT,GT,G_33834	chrXII_656891_G_A	chrXII_656891_G_A	chrXII_657926_GTTT_GTT,GT,G	0.246998	0.0462121	chrXII	1.95033e-31	chrXII_649036_G_A chrXII_649258_C_T chrXII_658599_G_T chrXII_658599_G_T	A	TRUE	chrXII	649837	657914	8078	*	FALSE	0.0473986	chrXII_656891_G_A	Lithium_Chloride;100mM;2	0.0001	0.000100005	39.0046	chrXII_657181_A_C_34168	chrXII_648877_T_C_34140	chrXII_657631_C_T_34177	chrXII_657181_A_C	chrXII_648877_T_C
Methotrexate;0.4mM;2	YDR014W	RAD61	chrIV	473914	476892	2979	+	0.936671	CLIB219x	decrease	0.0150244	0.109282	chrIV_475040_C_T				0.0001	0.000100005	11.3084	chrIV_480465_C_T_12430	chrIV_441824_G_A_12286	chrIV_482472_GAAAA_GAA,GAAA,G,GA_12432	chrIV_480465_C_T	chrIV_441824_G_A	chrIV_482472_GAAAA_GAA,GAAA,G,GA	-0.181474	0.029971	chrIV	7.65944e-13	chrIV_465056_C_G chrIV_467309_C_T chrIV_485050_G_A chrIV_488357_T_C	3043	TRUE	chrIV	458045	484973	26929	*	FALSE	0.112058	chrIV_480465_C_T	Methotrexate;0.4mM;2	0.0001	0.000100005	28.9801	chrIV_475040_C_T_13965	chrIV_473492_C_T_13955	chrIV_476652_T_TG_13985	chrIV_475040_C_T	chrIV_473492_C_T
Manganese_Sulfate;;1	YDL128W	VCX1	chrIV	232275	234406	2132	+	0.934888	YPS1009x	increase	0.0153652	0.248865	chrIV_233551_C_A				0.0001	0.000100005	21.9284	chrIV_234573_G_A_10408	chrIV_225140_A_G_10348	chrIV_252231_C_T_10525	chrIV_234573_G_A	chrIV_225140_A_G	chrIV_252231_C_T	0.223819	0.0329914	chrIV	1.80507e-24	chrIV_229560_T_C chrIV_231316_A_G chrIV_241613_T_C chrIV_243616_C_T	3008	TRUE	chrIV	219499	239484	19986	*	FALSE	0.170068	chrIV_234573_G_A	Manganese_Sulfate;;1	0.0001	0.000100005	77.4837	chrIV_233551_C_A_11801	chrIV_232936_A_G_11799	chrIV_234114_T_C_11807	chrIV_233551_C_A	chrIV_232936_A_G
YNB;ph3;1	YNL240C	NAR1	chrXIV	198222	200272	2051	-	0.931919	CBS2888a	decrease	0.0157214	0.852847	chrXIV_199740_A_G				0.0001	0.000100005	60.8918	chrXIV_199740_A_G_62741	chrXIV_199740_A_G_62741	chrXIV_200562_A_G_62745	chrXIV_199740_A_G	chrXIV_199740_A_G	chrXIV_200562_A_G	0.430656	0.202326	chrXIV	2.22658e-63	chrXIV_199105_G_A chrXIV_199105_G_A chrXIV_200562_A_G chrXIV_200562_A_G	3004	TRUE	chrXIV	199570	200562	993	*	FALSE	0.214033	chrXIV_199740_A_G	YNB;ph3;1	0.0001	0.000100005	61.7629	chrXIV_198937_G_A_60126	chrXIV_198443_A_G_60124	chrXIV_200562_A_G_60135	chrXIV_198937_G_A	chrXIV_198443_A_G
Magnesium_Chloride;;1	YNL085W	MKT1	chrXIV	466886	469837	2952	+	0.927501	BYa	decrease	0.0161024	0.717996	chrXIV_467219_A_G				0.0001	0.000100005	35.6481	chrXIV_467219_A_G_41540	chrXIV_467028_A_G_41539	chrXIV_469677_A_T_41542	chrXIV_467219_A_G	chrXIV_467028_A_G	chrXIV_469677_A_T	0.314809	0.0840743	chrXIV	3.29414e-36	chrXIV_466588_T_G chrXIV_466588_T_G chrXIV_469677_A_T chrXIV_470301_C_T	375	TRUE	chrXIV	466588	470844	4257	*	FALSE	0.585635	chrXIV_467219_A_G	Magnesium_Chloride;;1	0.0001	0.000100005	91.0604	chrXIV_466588_T_G_41198	chrXIV_466588_T_G_41198	chrXIV_469870_A_G_41203	chrXIV_466588_T_G	chrXIV_466588_T_G
Raffinose;;1	YNL085W	MKT1	chrXIV	466886	469837	2952	+	0.92737	BYa	decrease	0.0164793	0.664643	chrXIV_467219_A_G				0.0001	0.000100005	31.019	chrXIV_467219_A_G_41540	chrXIV_466588_T_G_41538	chrXIV_467219_A_G_41540	chrXIV_467219_A_G	chrXIV_466588_T_G	chrXIV_467219_A_G	0.277619	0.0662121	chrXIV	2.01451e-31	chrXIV_466588_T_G chrXIV_466588_T_G chrXIV_470301_C_T chrXIV_472584_G_C	375	TRUE	chrXIV	466588	473648	7061	*	FALSE	0.465398	chrXIV_467219_A_G	Raffinose;;1	0.0001	0.000100005	84.6761	chrXIV_466588_T_G_41198	chrXIV_466103_G_A_41197	chrXIV_470330_C_T_41205	chrXIV_466588_T_G	chrXIV_466103_G_A
EGTA;5mM;3	YLR214W	FRE1	chrXII	568244	570700	2457	+	0.926985	BYa	increase	0.0168537	0.670467	chrXII_570032_G_A				0.0001	0.000100005	24.434	chrXII_569539_C_T_33857	chrXII_569539_C_T_33857	chrXII_570914_G_A_33862	chrXII_569539_C_T	chrXII_569539_C_T	chrXII_570914_G_A	-0.281206	0.0563943	chrXII	1.0438e-27	chrXII_563530_GAT_GATATAT,G,GATATATAT chrXII_567957_C_T chrXII_572011_G_A chrXII_572946_T_C	375	TRUE	chrXII	560800	572946	12147	*	FALSE	0.20284	chrXII_569539_C_T	EGTA;5mM;3	0.0001	0.000100005	44.7336	chrXII_570032_G_A_33481	chrXII_568917_T_C_33479	chrXII_570032_G_A_33481	chrXII_570032_G_A	chrXII_568917_T_C
Fluconazole;100uM;2	YHR007C	ERG11	chrVIII	119765	122115	2351	-	0.926031	Y10x	decrease	0.0172294	0.827881	chrVIII_120226_A_G				0.0001	0.000100005	13.2538	chrVIII_114947_C_T_40583	chrVIII_75150_T_G_40187	chrVIII_118361_A_G_40641	chrVIII_114947_C_T	chrVIII_75150_T_G	chrVIII_118361_A_G	-0.225889	0.0457969	chrVIII	5.08141e-15	chrVIII_96485_C_T chrVIII_99753_C_G chrVIII_119341_C_G chrVIII_120226_A_G	3001	TRUE	chrVIII	101857	119670	17814	*	FALSE	0.0783962	chrVIII_114947_C_T	Fluconazole;100uM;2	0.0001	0.000100005	60.5773	chrVIII_120226_A_G_30484	chrVIII_111971_C_T_30401	chrVIII_120226_A_G_30484	chrVIII_120226_A_G	chrVIII_111971_C_T
YPD;37;1	YNL085W	MKT1	chrXIV	466886	469837	2952	+	0.925713	BYa	decrease	0.0176024	0.690019	chrXIV_467219_A_G				0.0001	0.000100005	58.1745	chrXIV_466588_T_G_41198	chrXIV_466588_T_G_41198	chrXIV_470330_C_T_41205	chrXIV_466588_T_G	chrXIV_466588_T_G	chrXIV_470330_C_T	0.27058	0.0658892	chrXIV	7.08245e-59	chrXIV_466103_G_A chrXIV_466103_G_A chrXIV_469224_A_G chrXIV_470301_C_T	A	TRUE	chrXIV	466103	469224	3122	*	FALSE	0.284982	chrXIV_466588_T_G	YPD;37;1	0.0001	0.000100005	28.6782	chrXIV_467219_A_G_41540	chrXIV_467028_A_G_41539	chrXIV_468488_A_G_41541	chrXIV_467219_A_G	chrXIV_467028_A_G
YPD;37;1	YMR164C	MSS11	chrXIII	586831	589794	2964	-	0.925213	M22	increase	0.0179737	0.123313	chrXIII_588579_A_C,T,*				0.0001	0.000100005	16.913	chrXIII_588579_A_C,T,*_66668	chrXIII_577330_G_A_66622	chrXIII_590855_G_A_66701	chrXIII_588579_A_C,T,*	chrXIII_577330_G_A	chrXIII_590855_G_A	0.181114	0.028448	chrXIII	1.47559e-31	chrXIII_579297_G_C chrXIII_582482_T_C chrXIII_590779_G_A chrXIII_591795_A_G	3028	TRUE	chrXIII	580784	590016	9233	*	FALSE	0.0378814	chrXIII_588579_A_C,T,*	YPD;37;1	0.0001	0.000100005	12.6502	chrXIII_589588_T_C_39382	chrXIII_587257_T_G_39353	chrXIII_592735_T_C_39406	chrXIII_589588_T_C	chrXIII_587257_T_G
Neomycin;5mg/mL;2	YDR040C	ENA1	chrIV	534887	539134	4248	-	0.924467	YJM454a	increase	0.018345	0.64084	chrIV_538081_A_G				0.0001	0.000100005	3.38062	chrIV_538081_A_G_9084	chrIV_46064_A_C_6951	chrIV_550660_T_G_9144	chrIV_538081_A_G	chrIV_46064_A_C	chrIV_550660_T_G	-0.0835575	0.0477071	chrIV	0.000220637	chrIV_520937_A_G chrIV_522874_A_G chrIV_549752_T_C chrIV_552048_C_T	381	TRUE	chrIV	512982	549752	36771	*	FALSE	0.0564159	chrIV_538081_A_G	Neomycin;5mg/mL;2	0.0001	0.000100005	51.9853	chrIV_538081_A_G_12336	chrIV_538081_A_G_12336	chrIV_538470_A_G_12338	chrIV_538081_A_G	chrIV_538081_A_G
Lactate;;1	YNL085W	MKT1	chrXIV	466886	469837	2952	+	0.924195	BYa	decrease	0.0187134	0.720422	chrXIV_467219_A_G				0.0001	0.000100005	37.6531	chrXIV_467219_A_G_41540	chrXIV_467028_A_G_41539	chrXIV_468488_A_G_41541	chrXIV_467219_A_G	chrXIV_467028_A_G	chrXIV_468488_A_G	0.327436	0.0797811	chrXIV	2.97806e-37	chrXIV_466588_T_G chrXIV_466588_T_G chrXIV_469677_A_T chrXIV_470301_C_T	375	TRUE	chrXIV	466588	470330	3743	*	FALSE	0.616756	chrXIV_467219_A_G	Lactate;;1	0.0001	0.000100005	61.7967	chrXIV_466588_T_G_41198	chrXIV_466103_G_A_41197	chrXIV_471767_A_G_41208	chrXIV_466588_T_G	chrXIV_466103_G_A
EtOH;;1	YIR018C-A		chrIX	385455	387635	2181	-	0.922512	CLIB413a	increase	0.0190877	0.163948	chrIX_387107_A_T				0.0001	0.000100005	15.3864	chrIX_393659_A_G_24795	chrIX_387959_T_C_24709	chrIX_394739_A_G_24806	chrIX_393659_A_G	chrIX_387959_T_C	chrIX_394739_A_G	-0.19075	0.0525984	chrIX	3.45192e-12	chrIX_386249_A_G chrIX_387368_A_G chrIX_396988_T_A chrIX_398583_G_C	377	TRUE	chrIX	384629	397439	12811	*	FALSE	0.1843	chrIX_393659_A_G	EtOH;;1	0.0001	0.000100005	47.9003	chrIX_387090_C_T_39559	chrIX_386334_A_T_39531	chrIX_387143_CAAAAAAAAAAA_CAAA,CAAAAAAA,C_39563	chrIX_387090_C_T	chrIX_386334_A_T
YNB;ph8;1	YKL210W	UBA1	chrXI	38658	42329	3672	+	0.920716	YPS163a	increase	0.0194687	0.181586	chrXI_40023_C_T				0.0222	0.00382503	5.20927	chrXI_40023_C_T_45655	chrXI_32204_T_C_45600	chrXI_42588_T_C_45691	chrXI_40023_C_T	chrXI_32204_T_C	chrXI_42588_T_C	0.136816	0.021096	chrXI	6.07386e-06	chrXI_22917_C_T chrXI_25673_G_A chrXI_47435_A_T chrXI_50257_G_A	376	TRUE	chrXI	37146	44681	7536	*	FALSE	0.0885287	chrXI_40023_C_T	YNB;ph8;1	0.0002	0.000125009	6.3239	chrXI_64947_G_A_39101	chrXI_33790_G_A_38936	chrXI_69964_A_G_39169	chrXI_64947_G_A	chrXI_33790_G_A
Congo_Red;75ug/mL;3	YBR140C	IRA1	chrII	517270	526825	9556	-	0.917871	Y10x	decrease	0.0198628	0.109506	chrII_520435_G_A				0.0047	0.00284542	7.68556	chrII_521451_C_T_4674	chrII_516986_G_A_4664	chrII_575190_G_A_4983	chrII_521451_C_T	chrII_516986_G_A	chrII_575190_G_A	-0.16784	0.0209651	chrII	3.61774e-09	chrII_499336_GA_G chrII_502224_G_A chrII_538820_A_T chrII_541156_G_A	3000	TRUE	chrII	514468	535883	21416	*	FALSE	0.0600775	chrII_521451_C_T	Congo_Red;75ug/mL;3	0.0001	0.000100005	12.4194	chrII_519856_G_A_6572	chrII_514239_G_A_6491	chrII_522969_T_A_6619	chrII_519856_G_A	chrII_514239_G_A
Sucrose;;1	YDL035C	GPR1	chrIV	389036	392056	3021	-	0.917399	273614xa	decrease	0.0202549	0.0639687	chrIV_390144_G_A				0.0008	0.000240068	6.50713	chrIV_390120_A_T_5495	chrIV_388305_A_G,T_5480	chrIV_397991_G_A_5552	chrIV_390120_A_T	chrIV_388305_A_G,T	chrIV_397991_G_A	0.149849	0.0227465	chrIV	4.38608e-08	chrIV_374546_T_C chrIV_375826_A_T chrIV_405794_A_G chrIV_410101_G_A	3003	TRUE	chrIV	365106	410375	45270	*	FALSE	0.0404412	chrIV_390120_A_T	Sucrose;;1	0.0001	0.000100005	15.6046	chrIV_391193_T_C_12685	chrIV_390097_G_A_12663	chrIV_391764_G_A_12689	chrIV_391193_T_C	chrIV_390097_G_A
Magnesium_Chloride;;1	YDR246W	TRS23	chrIV	954134	955039	906	+	0.915049	273614xa	decrease	0.0206568	0.915049	chrIV_954920_C_CA				0.0001	0.000100005	19.1827	chrIV_956918_C_T_16387	chrIV_953287_C_G_16362	chrIV_1006242_G_A_16731	chrIV_956918_C_T	chrIV_953287_C_G	chrIV_1006242_G_A	0.237823	0.042479	chrIV	3.31605e-21	chrIV_952937_G_A chrIV_954920_C_CA chrIV_959848_C_T chrIV_966953_C_A,G	3049	TRUE	chrIV	950198	974414	24217	*	FALSE	0.192414	chrIV_956918_C_T	Magnesium_Chloride;;1	0.0001	0.000100005	25.4196	chrIV_954920_C_CA_7352	chrIV_954920_C_CA_7352	chrIV_955222_C_T_7353	chrIV_954920_C_CA	chrIV_954920_C_CA
Tunicamycin;3uM;3	YBR243C	ALG7	chrII	705416	707159	1744	-	0.913643	YJM145x	increase	0.0210623	0.80327	chrII_705558_C_T				0.0001	0.000100005	12.1044	chrII_705558_C_T_4906	chrII_704282_T_A_4903	chrII_709875_T_G_4911	chrII_705558_C_T	chrII_704282_T_A	chrII_709875_T_G	0.193595	0.039192	chrII	5.60618e-15	chrII_693925_G_A chrII_700169_ATT_AT,A,ATTT chrII_713508_G_T chrII_716173_T_C	377	TRUE	chrII	698958	717369	18412	*	FALSE	0.299771	chrII_705558_C_T	Tunicamycin;3uM;3	0.0001	0.000100005	33.8325	chrII_706449_A_G_5723	chrII_705963_A_G_5721	chrII_716118_T_C_5770	chrII_706449_A_G	chrII_705963_A_G
Fructose;;1	YPL092W	SSU1	chrXVI	373357	375334	1978	+	0.912531	M22	increase	0.0214697	0.906958	chrXVI_374061_A_G				0.0033	0.0301201	9.16531	chrXVI_373847_A_G_48461	chrXVI_373847_A_G_48461	chrXVI_375693_G_A_48470	chrXVI_373847_A_G	chrXVI_373847_A_G	chrXVI_375693_G_A	0.216716	0.0263134	chrXVI	5.47665e-12	chrXVI_373641_T_G chrXVI_373847_A_G chrXVI_380502_G_A chrXVI_381702_C_T	375	TRUE	chrXVI	373847	380674	6828	*	FALSE	0.161085	chrXVI_373847_A_G	Fructose;;1	0.0001	0.000100005	53.0951	chrXVI_373699_GC_G_86334	chrXVI_373699_GC_G_86334	chrXVI_376755_G_A_86351	chrXVI_373699_GC_G	chrXVI_373699_GC_G
Sorbitol;1.5M;2	YOR140W	SFL1	chrXV	586981	589610	2630	+	0.906516	YPS1009x	increase	0.0219088	0.397797	chrXV_587401_G_A				0.0001	0.000100005	8.91954	chrXV_587142_A_G_76843	chrXV_586076_A_T_76837	chrXV_588604_G_A_76851	chrXV_587142_A_G	chrXV_586076_A_T	chrXV_588604_G_A	0.146215	0.0207089	chrXV	4.35179e-11	chrXV_577503_C_T chrXV_583442_A_T chrXV_589865_A_AAT,ATT chrXV_600978_G_C	2999	TRUE	chrXV	563299	606997	43699	*	FALSE	0.134093	chrXV_587142_A_G	Sorbitol;1.5M;2	0.0001	0.000100005	6.87362	chrXV_587394_T_C_68640	chrXV_538758_G_A_68439	chrXV_590725_T_C,A_68677	chrXV_587394_T_C	chrXV_538758_G_A
Congo_Red;75ug/mL;3	YOL152W	FRE7	chrXV	38077	43151	5075	+	0.906355	Y10x	decrease	0.0223436	0.755853	chrXV_41720_G_A				0.004	0.00122707	3.40299	chrXV_46390_C_T_79710	chrXV_331_C_G_78779	chrXV_65559_G_A_79970	chrXV_46390_C_T	chrXV_331_C_G	chrXV_65559_G_A	-0.126682	0.0276212	chrXV	0.000138514	chrXV_34115_A_G chrXV_37002_A_G chrXV_57941_G_C chrXV_65475_A_C	3001	TRUE	chrXV	33152	54505	21354	*	FALSE	0.0173913	chrXV_46390_C_T	Congo_Red;75ug/mL;3	0.0001	0.000100005	11.3249	chrXV_41720_G_A_60661	chrXV_293_T_A_60378	chrXV_42278_T_C_60668	chrXV_41720_G_A	chrXV_293_T_A
Fructose;;1	YOR125C	CAT5	chrXV	558836	559845	1010	-	0.905734	BYa	decrease	0.0227769	0.410904	chrXV_558913_G_C				0.0001	0.000100005	20.8946	chrXV_558912_C_T_45895	chrXV_555451_A_G_45884	chrXV_568141_T_C_45952	chrXV_558912_C_T	chrXV_555451_A_G	chrXV_568141_T_C	0.305511	0.0439556	chrXV	3.33685e-22	chrXV_553150_T_C chrXV_555451_A_G chrXV_560189_T_A chrXV_562672_G_C	A	TRUE	chrXV	555451	559477	4027	*	FALSE	0.322377	chrXV_558912_C_T	Fructose;;1	0.0001	0.000100005	30.2809	chrXV_559714_T_A_46188	chrXV_558913_G_C_46183	chrXV_563766_T_C_46208	chrXV_559714_T_A	chrXV_558913_G_C
EtOH_Glucose;;1	YNL084C	END3	chrXIV	469838	471238	1401	-	0.90373	BYa	decrease	0.023217	0.375996	chrXIV_470301_C_T				0.0001	0.000100005	26.2312	chrXIV_467219_A_G_41540	chrXIV_467028_A_G_41539	chrXIV_476709_GT_G_41557	chrXIV_467219_A_G	chrXIV_467028_A_G	chrXIV_476709_GT_G	0.266452	0.0538047	chrXIV	2.71221e-27	chrXIV_463554_A_T chrXIV_466588_T_G chrXIV_470301_C_T chrXIV_473303_T_C	375	TRUE	chrXIV	466588	473368	6781	*	FALSE	0.465347	chrXIV_467219_A_G	EtOH_Glucose;;1	0.0001	0.000100005	67.8824	chrXIV_470301_C_T_41204	chrXIV_466588_T_G_41198	chrXIV_471767_A_G_41208	chrXIV_470301_C_T	chrXIV_466588_T_G
Maltose;;1	YOR101W	RAS1	chrXV	514761	516297	1537	+	0.903146	YJM145x	decrease	0.0236553	0.284768	chrXV_516181_C_T				0.0001	0.000100005	25.293	chrXV_498787_T_C_60715	chrXV_494421_G_C_60684	chrXV_512566_G_T_60816	chrXV_498787_T_C	chrXV_494421_G_C	chrXV_512566_G_T	0.148776	0.0283623	chrXV	5.18008e-23	chrXV_495045_C_T chrXV_496368_C_T chrXV_511568_C_CA chrXV_515471_A_G	B	TRUE	chrXV	492749	518604	25856	*	FALSE	0.0379902	chrXV_498787_T_C	Maltose;;1	0.0001	0.000100005	15.833	chrXV_516181_C_T_46749	chrXV_516181_C_T_46749	chrXV_516275_C_T_46754	chrXV_516181_C_T	chrXV_516181_C_T
EGTA;5mM;3	YOL121C	RPS19A	chrXV	91722	93121	1400	-	0.902542	PW5a	decrease	0.024092	0.794492	chrXV_92185_C_T				0.0001	0.000100005	20.8671	chrXV_85038_C_A_68660	chrXV_81471_G_A_68618	chrXV_90306_G_A_68683	chrXV_85038_C_A	chrXV_81471_G_A	chrXV_90306_G_A	-0.272344	0.0571298	chrXV	1.7569e-24	chrXV_75674_T_G chrXV_76697_T_C chrXV_89502_A_AC chrXV_91491_G_A	3049	TRUE	chrXV	69757	94227	24471	*	FALSE	0.104217	chrXV_85038_C_A	EGTA;5mM;3	0.0001	0.000100005	38.7673	chrXV_92179_A_G_80318	chrXV_92179_A_G_80318	chrXV_92185_C_T_80319	chrXV_92179_A_G	chrXV_92179_A_G
Cobalt_Chloride;2mM;2	YLR257W		chrXII	655632	660252	4621	+	0.899774	BYa	decrease	0.0245398	0.104748	chrXII_657492_C_G				0.0001	0.000100005	64.7577	chrXII_648649_C_T_34139	chrXII_648649_C_T_34139	chrXII_657536_G_T_34175	chrXII_648649_C_T	chrXII_648649_C_T	chrXII_657536_G_T	0.373834	0.118993	chrXII	1.41736e-66	chrXII_646385_GA_GAAA,GAAAA,G,GAA chrXII_646705_A_G chrXII_657234_T_G chrXII_657536_G_T	375	TRUE	chrXII	646385	657536	11152	*	FALSE	0.208576	chrXII_648649_C_T	Cobalt_Chloride;2mM;2	0.0001	0.000100005	149.332	chrXII_656891_G_A_33805	chrXII_656891_G_A_33805	chrXII_657926_GTTT_GTT,GT,G_33834	chrXII_656891_G_A	chrXII_656891_G_A
Neomycin;5mg/mL;2	YDL227C	HO	chrIV	46094	49572	3479	-	0.897106	CLIB413a	increase	0.024998	0.224277	chrIV_46116_A_C				0.0001	0.000100005	108.379	chrIV_46116_A_C_6688	chrIV_44835_C_T_6684	chrIV_46353_NA_DEL_6698	chrIV_46116_A_C	chrIV_44835_C_T	chrIV_46353_NA_DEL	-0.546476	0.316189	chrIV	7.53388e-110	chrIV_44835_C_T chrIV_44835_C_T chrIV_46248_C_CT chrIV_46248_C_CT	377	TRUE	chrIV	44835	46353	1519	*	FALSE	0.0839098	chrIV_46116_A_C	Neomycin;5mg/mL;2	0.0001	0.000100005	186.541	chrIV_46064_A_C_10054	chrIV_46064_A_C_10054	chrIV_46353_NA_DEL_10066	chrIV_46064_A_C	chrIV_46064_A_C
Sucrose;;1	YPL091W	GLR1	chrXVI	375335	377121	1787	+	0.895522	YJM981x	increase	0.0254601	0.895522	chrXVI_376683_A_G				0.0254	0.00366626	6.57075	chrXVI_374156_G_T_36479	chrXVI_373674_G_A_36476	chrXVI_381864_A_G,*_36487	chrXVI_374156_G_T	chrXVI_373674_G_A	chrXVI_381864_A_G,*	0.289687	0.0433015	chrXVI	3.8354e-14	chrXVI_373674_G_A chrXVI_373674_G_A chrXVI_376683_A_G chrXVI_376683_A_G	3003	TRUE	chrXVI	373674	374422	749	*	FALSE	0.165721	chrXVI_374156_G_T	Sucrose;;1	0.0001	0.000100005	17.1377	chrXVI_379192_T_C_74518	chrXVI_375375_T_A_74490	chrXVI_379837_G_A_74529	chrXVI_379192_T_C	chrXVI_375375_T_A
Xylose;;1	YKL038W	RGT1	chrXI	364899	369240	4342	+	0.892063	CLIB219x	decrease	0.0259369	0.111111	chrXI_365664_A_T				0.0001	0.000100005	15.6441	chrXI_361682_G_A_53273	chrXI_357380_T_C_53243	chrXI_368313_T_C_53355	chrXI_361682_G_A	chrXI_357380_T_C	chrXI_368313_T_C	0.174588	0.0292663	chrXI	6.79184e-19	chrXI_355082_C_A chrXI_357004_A_G chrXI_366957_C_T chrXI_368622_G_A,T	3028	TRUE	chrXI	340583	367790	27208	*	FALSE	0.0505581	chrXI_361682_G_A	Xylose;;1	0.0001	0.000100005	18.8508	chrXI_366857_C_T_44430	chrXI_365138_A_G_44416	chrXI_371457_GT_GTT,G,GTTT_44455	chrXI_366857_C_T	chrXI_365138_A_G
YPD;;1	YOR125C	CAT5	chrXV	558836	559845	1010	-	0.891154	BYa	decrease	0.0264134	0.219108	chrXV_559714_T_A				0.0001	0.000100005	15.8777	chrXV_558953_G_A_45897	chrXV_555451_A_G_45884	chrXV_569259_A_G_45956	chrXV_558953_G_A	chrXV_555451_A_G	chrXV_569259_A_G	0.276536	0.033478	chrXV	1.5297e-17	chrXV_553150_T_C chrXV_555451_A_G chrXV_560432_G_A chrXV_566373_A_C	A	TRUE	chrXV	551813	563766	11954	*	FALSE	0.240722	chrXV_558953_G_A	YPD;;1	0.0001	0.000100005	20.6597	chrXV_559714_T_A_46188	chrXV_558913_G_C_46183	chrXV_569825_C_T_46246	chrXV_559714_T_A	chrXV_558913_G_C
Paraquat;0.75mM;3	YDL081C	RPP1A	chrIV	309595	310381	787	-	0.890905	Y10x	decrease	0.0268858	0.283877	chrIV_310207_A_G				0.0001	0.000100005	148.976	chrIV_311278_T_G_10289	chrIV_311278_T_G_10289	chrIV_311446_C_T_10290	chrIV_311278_T_G	chrIV_311278_T_G	chrIV_311446_C_T	-0.552374	0.310916	chrIV	1.96092e-148	chrIV_310207_A_G chrIV_311278_T_G chrIV_311278_T_G chrIV_311278_T_G	3000	TRUE	chrIV	310207	311446	1240	*	FALSE	0.46798	chrIV_311278_T_G	Paraquat;0.75mM;3	0.0001	0.000100005	107.521	chrIV_310207_A_G_14566	chrIV_310207_A_G_14566	chrIV_310603_A_G_14572	chrIV_310207_A_G	chrIV_310207_A_G
Fructose;;1	YNL084C	END3	chrXIV	469838	471238	1401	-	0.889697	BYa	decrease	0.0273598	0.367459	chrXIV_470301_C_T				0.0001	0.000100005	23.7033	chrXIV_467219_A_G_41540	chrXIV_467028_A_G_41539	chrXIV_476709_GT_G_41557	chrXIV_467219_A_G	chrXIV_467028_A_G	chrXIV_476709_GT_G	0.257353	0.0568168	chrXIV	8.10879e-25	chrXIV_463554_A_T chrXIV_466588_T_G chrXIV_470301_C_T chrXIV_472584_G_C	375	TRUE	chrXIV	463554	473648	10095	*	FALSE	0.406752	chrXIV_467219_A_G	Fructose;;1	0.0001	0.000100005	68.0055	chrXIV_470301_C_T_41204	chrXIV_466588_T_G_41198	chrXIV_470440_T_C_41206	chrXIV_470301_C_T	chrXIV_466588_T_G
Sucrose;;1	YNL085W	MKT1	chrXIV	466886	469837	2952	+	0.883799	BYa	decrease	0.0278617	0.621465	chrXIV_467219_A_G				0.0001	0.000100005	21.2829	chrXIV_467219_A_G_41540	chrXIV_467028_A_G_41539	chrXIV_476709_GT_G_41557	chrXIV_467219_A_G	chrXIV_467028_A_G	chrXIV_476709_GT_G	0.222932	0.0459466	chrXIV	2.44101e-21	chrXIV_463554_A_T chrXIV_466588_T_G chrXIV_472575_AG_A chrXIV_476037_T_C	375	TRUE	chrXIV	466588	472584	5997	*	FALSE	0.406082	chrXIV_467219_A_G	Sucrose;;1	0.0001	0.000100005	79.7397	chrXIV_466588_T_G_41198	chrXIV_466588_T_G_41198	chrXIV_467219_A_G_41200	chrXIV_466588_T_G	chrXIV_466588_T_G
YPD;37;1	YPL082C	MOT1	chrXVI	398292	404515	6224	-	0.882763	I14a	decrease	0.0283638	0.577809	chrXVI_399717_G_C				0.0001	0.000100005	15.5757	chrXVI_399717_G_C_68986	chrXVI_389788_G_A_68973	chrXVI_407858_A_G_68993	chrXVI_399717_G_C	chrXVI_389788_G_A	chrXVI_407858_A_G	0.218469	0.0417982	chrXVI	3.49483e-18	chrXVI_379218_G_A chrXVI_381848_GTATATATATATATATATA_GTATATATATA,GTATATATATATA,GTATA,GTATATATATATATATATATATATA,G,GTATATA chrXVI_407858_A_G chrXVI_412938_A_G	3000	TRUE	chrXVI	384709	404753	20045	*	FALSE	0.22314	chrXVI_399717_G_C	YPD;37;1	0.0001	0.000100005	30.2681	chrXVI_402317_G_A_83069	chrXVI_383599_T_C_82977	chrXVI_407036_G_A_83102	chrXVI_402317_G_A	chrXVI_383599_T_C
Formamide;2%;2	YIR019C	FLO11	chrIX	387636	393964	6329	-	0.881058	YPS1009x	decrease	0.0288698	0.281896	chrIX_393339_A_G,T				0.0001	0.000100005	14.8726	chrIX_394553_G_A_43698	chrIX_389872_G_A_43642	chrIX_397439_C_A_43763	chrIX_394553_G_A	chrIX_389872_G_A	chrIX_397439_C_A	-0.213696	0.0412754	chrIX	1.00608e-17	chrIX_386334_A_T chrIX_388144_A_T chrIX_397230_T_A chrIX_398084_G_A	2999	TRUE	chrIX	389872	398130	8259	*	FALSE	0.0588915	chrIX_394553_G_A	Formamide;2%;2	0.0001	0.000100005	18.5317	chrIX_393339_A_G,T_37568	chrIX_393165_T_G_37560	chrIX_393508_T_C_37582	chrIX_393339_A_G,T	chrIX_393165_T_G
EGTA;5mM;3	YIR019C	FLO11	chrIX	387636	393964	6329	-	0.877003	YJM145x	decrease	0.0293928	0.327992	chrIX_388520_A_C				0.0001	0.000100005	9.49734	chrIX_386665_G_T,*_34409	chrIX_383251_A_G_34359	chrIX_395026_T_G_34478	chrIX_386665_G_T,*	chrIX_383251_A_G	chrIX_395026_T_G	0.126377	0.0389403	chrIX	1.74097e-09	chrIX_379413_T_C chrIX_382331_T_C chrIX_398250_C_T chrIX_399554_G_C	B	TRUE	chrIX	383251	398262	15012	*	FALSE	0.0283133	chrIX_386665_G_T,*	EGTA;5mM;3	0.0001	0.000100005	14.7177	chrIX_388551_A_C,G_24731	chrIX_388256_G_A_24723	chrIX_388987_G_A_24740	chrIX_388551_A_C,G	chrIX_388256_G_A
Sorbitol;1.5M;2	YLL008W	DRS1	chrXII	131571	134143	2573	+	0.876308	Y10x	decrease	0.0299138	0.656518	chrXII_133303_C_T				0.0001	0.000100005	8.62491	chrXII_132610_G_A_59561	chrXII_130405_C_G_59532	chrXII_168303_G_A_59763	chrXII_132610_G_A	chrXII_130405_C_G	chrXII_168303_G_A	-0.199159	0.0526106	chrXII	1.3497e-11	chrXII_130067_G_GCTGCGACTGCGA chrXII_130739_G_A chrXII_139579_T_C chrXII_150515_T_C	3001	TRUE	chrXII	130067	149035	18969	*	FALSE	0.127924	chrXII_132610_G_A	Sorbitol;1.5M;2	0.0001	0.000100005	20.0872	chrXII_133123_C_T_44850	chrXII_132472_T_C_44849	chrXII_154089_C_A_44925	chrXII_133123_C_T	chrXII_132472_T_C
Diamide;1.5mM;3	YNL083W	SAL1	chrXIV	471239	473125	1887	+	0.874666	BYa	decrease	0.030438	0.260644	chrXIV_472575_AG_A				0.0001	0.000100005	29.8717	chrXIV_468488_A_G_41541	chrXIV_467028_A_G_41539	chrXIV_473648_T_C_41555	chrXIV_468488_A_G	chrXIV_467028_A_G	chrXIV_473648_T_C	0.292183	0.0801936	chrXIV	3.62622e-32	chrXIV_466588_T_G chrXIV_467028_A_G chrXIV_473303_T_C chrXIV_476037_T_C	375	TRUE	chrXIV	453937	476709	22773	*	FALSE	0.390421	chrXIV_468488_A_G	Diamide;1.5mM;3	0.0001	0.000100005	72.5687	chrXIV_472575_AG_A_41209	chrXIV_466588_T_G_41198	chrXIV_473648_T_C_41215	chrXIV_472575_AG_A	chrXIV_466588_T_G
YNB;ph3;1	YNL240C	NAR1	chrXIV	198222	200272	2051	-	0.874261	RMx	increase	0.0309588	0.445408	chrXIV_199105_G_A				0.0001	0.000100005	15.2423	chrXIV_197764_GTCC_G_40512	chrXIV_190876_G_A_40479	chrXIV_199403_A_G_40516	chrXIV_197764_GTCC_G	chrXIV_190876_G_A	chrXIV_199403_A_G	0.217526	0.0532264	chrXIV	2.02063e-17	chrXIV_189585_C_T chrXIV_190876_G_A chrXIV_201973_C_T chrXIV_204167_G_T	A	TRUE	chrXIV	191079	199403	8325	*	FALSE	0.208264	chrXIV_197764_GTCC_G	YNB;ph3;1	0.0001	0.000100005	9.99586	chrXIV_199012_T_C_64118	chrXIV_189381_G_A_64061	chrXIV_210877_G_A_64201	chrXIV_199012_T_C	chrXIV_189381_G_A
Lithium_Chloride;100mM;2	YIL130W	ASG1	chrIX	102508	105890	3383	+	0.873051	BYa	decrease	0.0314805	0.144388	chrIX_103838_A_T				0.0001	0.000100005	40.7179	chrIX_102974_C_T_23008	chrIX_101006_T_C_22985	chrIX_117012_T_A_23052	chrIX_102974_C_T	chrIX_101006_T_C	chrIX_117012_T_A	0.229518	0.0524437	chrIX	3.75979e-41	chrIX_101006_T_C chrIX_101559_T_C chrIX_105090_T_C chrIX_113517_G_A	375	TRUE	chrIX	100530	114240	13711	*	FALSE	0.191843	chrIX_102974_C_T	Lithium_Chloride;100mM;2	0.0001	0.000100005	62.0967	chrIX_104128_G_A_22645	chrIX_103157_T_C_22637	chrIX_105385_CAATAGTGGTAATAGTAGTAAT_C,TAATAGTGGTAATAGTAGTAAT,*_22657	chrIX_104128_G_A	chrIX_103157_T_C
Diamide;1.5mM;3	YLL007C	LMO1	chrXII	134144	136321	2178	-	0.868279	Y10x	decrease	0.0320223	0.375888	chrXII_134655_T_C				0.0001	0.000100005	18.5126	chrXII_136300_T_C_59574	chrXII_130857_C_G_59536	chrXII_144276_G_A_59612	chrXII_136300_T_C	chrXII_130857_C_G	chrXII_144276_G_A	-0.290739	0.0863379	chrXII	1.62953e-20	chrXII_131706_C_T chrXII_133303_C_T chrXII_139815_A_G chrXII_143970_G_A	3001	TRUE	chrXII	130643	146632	15990	*	FALSE	0.17459	chrXII_136300_T_C	Diamide;1.5mM;3	0.0001	0.000100005	30.9963	chrXII_134655_T_C_44860	chrXII_133849_A_G_44854	chrXII_142485_A_G_44877	chrXII_134655_T_C	chrXII_133849_A_G
Fructose;;1	YNL142W	MEP2	chrXIV	357319	359273	1955	+	0.867188	YJM145x	decrease	0.0325642	0.601562	chrXIV_358880_T_C				0.0001	0.000100005	49.9081	chrXIV_364317_A_T_54858	chrXIV_363393_T_A,G_54854	chrXIV_364987_G_A_54861	chrXIV_364317_A_T	chrXIV_363393_T_A,G	chrXIV_364987_G_A	0.305192	0.0633529	chrXIV	1.62197e-50	chrXIV_358757_C_T chrXIV_363393_T_A,G chrXIV_364987_G_A chrXIV_365984_C_T	B	TRUE	chrXIV	360630	368397	7768	*	FALSE	0.172442	chrXIV_364317_A_T	Fructose;;1	0.0001	0.000100005	28.5126	chrXIV_358880_T_C_42712	chrXIV_357333_C_G_42697	chrXIV_367094_G_A_42767	chrXIV_358880_T_C	chrXIV_357333_C_G
EGTA;5mM;3	YLR214W	FRE1	chrXII	568244	570700	2457	+	0.864656	RMx	decrease	0.0331138	0.658485	chrXII_570032_G_A				0.0001	0.000100005	9.11293	chrXII_566515_G_A_53217	chrXII_554931_G_A_53152	chrXII_567365_C_T_53219	chrXII_566515_G_A	chrXII_554931_G_A	chrXII_567365_C_T	0.147649	0.0347201	chrXII	6.37157e-09	chrXII_545104_G_A chrXII_550665_T_C chrXII_577508_C_T chrXII_585608_T_G	376	TRUE	chrXII	544057	572186	28130	*	FALSE	0.0710572	chrXII_566515_G_A	EGTA;5mM;3	0.0001	0.000100005	44.7336	chrXII_570032_G_A_33481	chrXII_568917_T_C_33479	chrXII_570032_G_A_33481	chrXII_570032_G_A	chrXII_568917_T_C
Manganese_Sulfate;;1	YFR034C	PHO4	chrVI	224894	225989	1096	-	0.864027	YPS1009x	decrease	0.033661	0.426459	chrVI_224997_A_AG				0.0001	0.000100005	28.4242	chrVI_224997_A_AG_27208	chrVI_224892_A_AGTAG_27207	chrVI_225264_C_G_27210	chrVI_224997_A_AG	chrVI_224892_A_AGTAG	chrVI_225264_C_G	-0.204856	0.0735265	chrVI	6.6572e-29	chrVI_224053_A_G chrVI_224578_GTCA_G,ATCA chrVI_225352_C_T chrVI_225666_T_C	2999	TRUE	chrVI	224275	225352	1078	*	FALSE	0.263254	chrVI_224997_A_AG	Manganese_Sulfate;;1	0.0001	0.000100005	45.5865	chrVI_224892_A_AGTAG_23736	chrVI_224792_CGT_C_23735	chrVI_225030_A_C_23738	chrVI_224892_A_AGTAG	chrVI_224792_CGT_C
Sorbitol;1.5M;2	YNL182C	IPI3	chrXIV	295734	297980	2247	-	0.863037	I14a	increase	0.0342075	0.155433	chrXIV_297636_C_T				0.0001	0.000100005	15.5507	chrXIV_302623_T_A_57096	chrXIV_292862_C_T_57009	chrXIV_339555_C_T_57348	chrXIV_302623_T_A	chrXIV_292862_C_T	chrXIV_339555_C_T	-0.231261	0.0362489	chrXIV	9.32123e-18	chrXIV_292363_C_A chrXIV_297448_C_A chrXIV_304694_C_CTT chrXIV_307707_A_G	3000	TRUE	chrXIV	292355	306600	14246	*	FALSE	0.104	chrXIV_302623_T_A	Sorbitol;1.5M;2	0.0001	0.000100005	27.926	chrXIV_297636_C_T_68779	chrXIV_297636_C_T_68779	chrXIV_306326_C_T_68875	chrXIV_297636_C_T	chrXIV_297636_C_T
Mannose;;1	YOL084W	PHM7	chrXV	162185	165521	3337	+	0.853577	BYa	increase	0.0347981	0.220466	chrXV_163510_T_C				0.0002	0.000116674	10.8925	chrXV_147687_G_A_43849	chrXV_143022_A_G_43799	chrXV_157219_T_C_43932	chrXV_147687_G_A	chrXV_143022_A_G	chrXV_157219_T_C	-0.171545	0.0230073	chrXV	2.99019e-12	chrXV_138754_G_A chrXV_142001_C_T chrXV_159655_C_T chrXV_164708_A_G	375	TRUE	chrXV	142001	167483	25483	*	FALSE	0.0705623	chrXV_147687_G_A	Mannose;;1	0.0001	0.000100005	68.4778	chrXV_163510_T_C_43639	chrXV_160981_AG_A,*_43620	chrXV_167483_C_T_43700	chrXV_163510_T_C	chrXV_160981_AG_A,*
Paraquat;0.75mM;3	YLR214W	FRE1	chrXII	568244	570700	2457	+	0.8532	RMx	increase	0.0353845	0.757962	chrXII_570032_G_A				0.0001	0.000100005	61.8585	chrXII_571001_C_T_53232	chrXII_567955_C_G_53220	chrXII_571001_C_T_53232	chrXII_571001_C_T	chrXII_567955_C_G	chrXII_571001_C_T	-0.311188	0.127806	chrXII	1.09643e-39	chrXII_570009_G_A chrXII_570676_T_C chrXII_571001_C_T chrXII_571001_C_T	376	TRUE	chrXII	568962	571001	2040	*	FALSE	0.597542	chrXII_571001_C_T	Paraquat;0.75mM;3	0.0001	0.000100005	84.4254	chrXII_570032_G_A_33481	chrXII_570032_G_A_33481	chrXII_572011_G_A_33493	chrXII_570032_G_A	chrXII_570032_G_A
Glycerol;;1	YOL078W	AVO1	chrXV	181568	185324	3757	+	0.851079	YPS163a	increase	0.0359759	0.415827	chrXV_182884_C_T				0.0001	0.000100005	10.9838	chrXV_171745_C_T_58597	chrXV_85382_CTTT_CTT,C,CT_58047	chrXV_187590_T_C_58720	chrXV_171745_C_T	chrXV_85382_CTTT_CTT,C,CT	chrXV_187590_T_C	0.130483	0.0521939	chrXV	1.12007e-10	chrXV_159763_A_G chrXV_163690_C_T chrXV_187423_C_T chrXV_193761_A_G	B	TRUE	chrXV	160931	187590	26660	*	FALSE	0.0404706	chrXV_171745_C_T	Glycerol;;1	0.0001	0.000100005	36.8134	chrXV_182884_C_T_69734	chrXV_171511_A_C_69622	chrXV_182917_T_C_69735	chrXV_182884_C_T	chrXV_171511_A_C
Zeocin;25ug/mL;3	YPL092W	SSU1	chrXVI	373357	375334	1978	+	0.848645	M22	increase	0.0365737	0.833935	chrXVI_374061_A_G				0.0001	0.000100005	18.0427	chrXVI_373847_A_G_48461	chrXVI_373847_A_G_48461	chrXVI_376683_A_G_48474	chrXVI_373847_A_G	chrXVI_373847_A_G	chrXVI_376683_A_G	0.251104	0.0390321	chrXVI	5.19179e-20	chrXVI_373847_A_G chrXVI_373847_A_G chrXVI_378640_G_T chrXVI_379429_GT_GTTGTTGTTGTTAT,G,*	375	TRUE	chrXVI	373847	379429	5583	*	FALSE	0.226606	chrXVI_373847_A_G	Zeocin;25ug/mL;3	0.0001	0.000100005	40.1738	chrXVI_373699_GC_G_86334	chrXVI_373699_GC_G_86334	chrXVI_374377_A_G_86338	chrXVI_373699_GC_G	chrXVI_373699_GC_G
Lactate;;1	YOR125C	CAT5	chrXV	558836	559845	1010	-	0.846285	YJM145x	decrease	0.0371775	0.406693	chrXV_559546_G_A				0.0045	0.000901717	6.79062	chrXV_547486_T_C_46967	chrXV_516181_C_T_46749	chrXV_571108_C_T_47089	chrXV_547486_T_C	chrXV_516181_C_T	chrXV_571108_C_T	-0.141424	0.0209264	chrXV	9.7229e-08	chrXV_528166_G_A chrXV_531358_C_T chrXV_564278_T_C chrXV_567267_C_T	377	TRUE	chrXV	522475	560432	37958	*	FALSE	0.0588235	chrXV_547486_T_C	Lactate;;1	0.0001	0.000100005	24.9002	chrXV_559459_T_C_61134	chrXV_559459_T_C_61134	chrXV_563008_G_A_61153	chrXV_559459_T_C	chrXV_559459_T_C
Lactate;;1	YIR019C	FLO11	chrIX	387636	393964	6329	-	0.842686	YPS1009x	decrease	0.0377936	0.249054	chrIX_393339_A_G,T				0.0004	0.000333393	15.0209	chrIX_396227_A_T_43739	chrIX_389872_G_A_43642	chrIX_398655_T_A_43781	chrIX_396227_A_T	chrIX_389872_G_A	chrIX_398655_T_A	-0.228092	0.0302995	chrIX	4.60225e-16	chrIX_390207_T_C chrIX_393247_C_T chrIX_398084_G_A chrIX_398653_T_C	2999	TRUE	chrIX	392815	397439	4625	*	FALSE	0.0703986	chrIX_396227_A_T	Lactate;;1	0.0001	0.000100005	20.7978	chrIX_393339_A_G,T_37568	chrIX_393247_C_T_37563	chrIX_393442_G_A_37577	chrIX_393339_A_G,T	chrIX_393247_C_T
Lithium_Chloride;100mM;2	YOL089C	HAL9	chrXV	150337	153700	3364	-	0.841486	BYa	increase	0.0384095	0.118736	chrXV_151148_C_A				0.0001	0.000100005	31.8777	chrXV_151148_C_A_43883	chrXV_146472_G_A_43837	chrXV_152215_T_C_43894	chrXV_151148_C_A	chrXV_146472_G_A	chrXV_152215_T_C	-0.215744	0.0548198	chrXV	1.72979e-32	chrXV_147591_C_T chrXV_149214_A_G chrXV_151997_G_A chrXV_152424_T_C	375	TRUE	chrXV	148695	152424	3730	*	FALSE	0.165418	chrXV_151148_C_A	Lithium_Chloride;100mM;2	0.0001	0.000100005	72.6933	chrXV_150111_G_A_43529	chrXV_149214_A_G_43525	chrXV_151997_G_A_43548	chrXV_150111_G_A	chrXV_149214_A_G
Diamide;1.5mM;3	YEL041W	YEF1	chrV	75635	77741	2107	+	0.841146	YJM981x	decrease	0.0390209	0.78125	chrV_77484_G_A				0.0001	0.000100005	12.8688	chrV_84912_TA_TAA,T_20015	chrV_77986_T_C_19957	chrV_90746_T_C_20051	chrV_84912_TA_TAA,T	chrV_77986_T_C	chrV_90746_T_C	-0.193714	0.0382878	chrV	2.46901e-14	chrV_78895_C_G chrV_80437_G_C chrV_96701_T_G chrV_99179_T_C	3004	TRUE	chrV	71771	99091	27321	*	FALSE	0.0681818	chrV_84912_TA_TAA,T	Diamide;1.5mM;3	0.0001	0.000100005	50.179	chrV_77423_G_T_8570	chrV_74994_T_C_8561	chrV_78959_C_T_8576	chrV_77423_G_T	chrV_74994_T_C
Sucrose;;1	YOL081W	IRA2	chrXV	170522	180432	9911	+	0.839405	RMx	decrease	0.0396349	0.106092	chrXV_171511_A_C				0.0001	0.000100005	8.90837	chrXV_166989_G_A_43690	chrXV_140557_G_A_43439	chrXV_184082_G_A_43876	chrXV_166989_G_A	chrXV_140557_G_A	chrXV_184082_G_A	-0.153762	0.0405499	chrXV	4.18093e-11	chrXV_146472_G_A chrXV_154056_T_C chrXV_185252_G_C chrXV_186481_G_A	A	TRUE	chrXV	156847	182386	25540	*	FALSE	0.01541	chrXV_166989_G_A	Sucrose;;1	0.0001	0.000100005	17.1104	chrXV_171511_A_C_69622	chrXV_169572_C_T_69604	chrXV_185983_G_A_69759	chrXV_171511_A_C	chrXV_169572_C_T
YPD;37;1	YJL005W	CYR1	chrX	424633	431412	6780	+	0.838219	YJM981x	decrease	0.0402487	0.14658	chrX_431354_T_C				0.0001	0.000100005	14.5958	chrX_406781_G_A_20198	chrX_396269_G_A_20137	chrX_458564_T_C_20480	chrX_406781_G_A	chrX_396269_G_A	chrX_458564_T_C	-0.160676	0.0257339	chrX	1.03712e-15	chrX_396819_A_T chrX_398716_A_G chrX_419759_C_T chrX_424353_A_G	3003	TRUE	chrX	399979	431673	31695	*	FALSE	0.0889387	chrX_406781_G_A	YPD;37;1	0.0001	0.000100005	31.4915	chrX_431354_T_C_43069	chrX_426287_C_A_43053	chrX_445483_G_A_43135	chrX_431354_T_C	chrX_426287_C_A
Trehalose;;1	YOL081W	IRA2	chrXV	170522	180432	9911	+	0.837729	YPS163a	increase	0.0408588	0.0435897	chrXV_178287_A_G				0.0001	0.000100005	13.1292	chrXV_183901_T_A_58693	chrXV_113935_CA_C_58272	chrXV_187590_T_C_58720	chrXV_183901_T_A	chrXV_113935_CA_C	chrXV_187590_T_C	0.191323	0.0462389	chrXV	8.52327e-14	chrXV_165797_C_A chrXV_169755_A_G chrXV_191548_T_C chrXV_193609_G_A	B	TRUE	chrXV	172926	187590	14665	*	FALSE	0.0316109	chrXV_183901_T_A	Trehalose;;1	0.0001	0.000100005	22.5072	chrXV_171973_T_C_69626	chrXV_171511_A_C_69622	chrXV_180517_AT_A_69703	chrXV_171973_T_C	chrXV_171511_A_C
Sucrose;;1	YNL132W	KRE33	chrXIV	375006	378628	3623	+	0.834902	RMx	decrease	0.0414769	0.234816	chrXIV_377031_A_G				0.0001	0.000100005	20.0269	chrXIV_374471_T_C_65228	chrXIV_372366_G_A_65208	chrXIV_377864_T_C_65252	chrXIV_374471_T_C	chrXIV_372366_G_A	chrXIV_377864_T_C	0.25633	0.0554761	chrXIV	4.58892e-22	chrXIV_372107_G_A chrXIV_373080_T_C chrXIV_377751_G_A chrXIV_382260_T_C	376	TRUE	chrXIV	370870	389979	19110	*	FALSE	0.189765	chrXIV_374471_T_C	Sucrose;;1	0.0001	0.000100005	54.6108	chrXIV_377031_A_G_40942	chrXIV_376313_C_T_40938	chrXIV_377751_G_A_40944	chrXIV_377031_A_G	chrXIV_376313_C_T
Congo_Red;75ug/mL;3	YOL082W	ATG19	chrXV	167664	170521	2858	+	0.833689	RMx	decrease	0.0420949	0.144966	chrXV_168263_A_G				0.0001	0.000100005	25.0456	chrXV_171150_T_C_43758	chrXV_163253_T_C_43638	chrXV_184082_G_A_43876	chrXV_171150_T_C	chrXV_163253_T_C	chrXV_184082_G_A	-0.250177	0.063995	chrXV	5.14136e-29	chrXV_160688_G_A chrXV_163253_T_C chrXV_179850_A_G chrXV_184291_A_C	A	TRUE	chrXV	163253	179760	16508	*	FALSE	0.0278169	chrXV_171150_T_C	Congo_Red;75ug/mL;3	0.0001	0.000100005	21.4406	chrXV_168263_A_G_69588	chrXV_163852_C_T_69524	chrXV_180228_T_G_69699	chrXV_168263_A_G	chrXV_163852_C_T
EtOH;;1	YJL008C	CCT8	chrX	419957	422179	2223	-	0.833634	YJM981x	increase	0.0427071	0.490798	chrX_421583_T_C				0.0001	0.000100005	17.8014	chrX_437923_A_G_20371	chrX_415658_A_G_20247	chrX_453526_GA_G_20457	chrX_437923_A_G	chrX_415658_A_G	chrX_453526_GA_G	0.267094	0.065063	chrX	1.56584e-19	chrX_414944_T_C chrX_415658_A_G chrX_455330_T_A chrX_456997_T_A	3003	TRUE	chrX	419079	456997	37919	*	FALSE	0.027628	chrX_437923_A_G	EtOH;;1	0.0001	0.000100005	76.8517	chrX_421370_G_A_43021	chrX_418304_T_C_43012	chrX_422683_A_G_43030	chrX_421370_G_A	chrX_418304_T_C
Mannose;;1	YJR089W	BIR1	chrX	587545	590726	3182	+	0.833465	Y10x	increase	0.0433141	0.0837945	chrX_589418_A_G				0.0001	0.000100005	10.4795	chrX_612406_A_T_39161	chrX_608157_C_T_39142	chrX_625653_A_G_39252	chrX_612406_A_T	chrX_608157_C_T	chrX_625653_A_G	0.177289	0.0270641	chrX	7.60136e-12	chrX_607764_T_C chrX_607975_T_C chrX_624746_C_T chrX_631452_T_C	3000	TRUE	chrX	587401	621875	34475	*	FALSE	0.0423313	chrX_612406_A_T	Mannose;;1	0.0001	0.000100005	6.19711	chrX_564818_T_C_51386	chrX_564818_T_C_51386	chrX_627495_TATTAACTTCTGCAATGATGAGATA_T_51858	chrX_564818_T_C	chrX_564818_T_C
Lactate;;1	YBR140C	IRA1	chrII	517270	526825	9556	-	0.832983	Y10x	decrease	0.0439175	0.0945378	chrII_522849_C_A				0.0015	0.000525309	5.55741	chrII_526608_T_C,A_4694	chrII_516986_G_A_4664	chrII_543588_T_C_4854	chrII_526608_T_C,A	chrII_516986_G_A	chrII_543588_T_C	-0.141135	0.0215906	chrII	2.85576e-07	chrII_503085_C_G chrII_504994_T_C chrII_541458_GTCATCATCATCATCATCATCATCATCATCATCATCATCATCA_GTCATCATCA,GTCATCATCATCATCATCATCA,GTCATCATCATCATCA,GTCATCATCATCA,G,GTCATCATCATCATCATCATCATCA chrII_546316_A_G	3000	TRUE	chrII	501537	531664	30128	*	FALSE	0.037594	chrII_526608_T_C,A	Lactate;;1	0.0001	0.000100005	13.5642	chrII_522440_G_A_6609	chrII_514239_G_A_6491	chrII_527211_G_A_6682	chrII_522440_G_A	chrII_514239_G_A
Cobalt_Chloride;2mM;2	YPR070W	MED1	chrXVI	685667	687884	2218	+	0.831718	YJM454a	decrease	0.0445212	0.170164	chrXVI_685682_C_T				0.0001	0.000100005	19.4766	chrXVI_688569_T_G_57255	chrXVI_677141_A_G_57173	chrXVI_690613_A_G_57279	chrXVI_688569_T_G	chrXVI_677141_A_G	chrXVI_690613_A_G	0.201867	0.0393719	chrXVI	3.72173e-24	chrXVI_681950_G_A chrXVI_682729_C_G chrXVI_692104_T_C chrXVI_692701_C_T	381	TRUE	chrXVI	682519	691627	9109	*	FALSE	0.0809179	chrXVI_688569_T_G	Cobalt_Chloride;2mM;2	0.0001	0.000100005	16.4429	chrXVI_685682_C_T_76459	chrXVI_675721_T_C,*_76401	chrXVI_694990_G_C_76533	chrXVI_685682_C_T	chrXVI_675721_T_C,*
YPD;15;1	YLL008W	DRS1	chrXII	131571	134143	2573	+	0.830073	Y10x	decrease	0.0451271	0.444968	chrXII_133849_A_G				0.0001	0.000100005	19.6689	chrXII_133849_A_G_44854	chrXII_132472_T_C_44849	chrXII_142485_A_G_44877	chrXII_133849_A_G	chrXII_132472_T_C	chrXII_142485_A_G	-0.251767	0.0655018	chrXII	1.1409e-20	chrXII_131100_A_T chrXII_131468_G_A chrXII_141885_T_C chrXII_144276_G_A	3000	TRUE	chrXII	129169	146588	17420	*	FALSE	0.152652	chrXII_133849_A_G	YPD;15;1	0.0001	0.000100005	17.9587	chrXII_132610_G_A_59561	chrXII_132074_A_C_59551	chrXII_136368_C_T_59575	chrXII_132610_G_A	chrXII_132074_A_C
YPD;;1	YIL119C	RPI1	chrIX	136381	138813	2433	-	0.828427	YJM454a	decrease	0.045735	0.383165	chrIX_138203_A_G				0.0001	0.000100005	25.6	chrIX_135577_A_G_26318	chrIX_127686_T_A_26271	chrIX_141727_T_C_26353	chrIX_135577_A_G	chrIX_127686_T_A	chrIX_141727_T_C	0.27649	0.0732006	chrIX	6.87996e-28	chrIX_126525_G_A chrIX_128507_ATCCTCC_ATCC,ATCCTCCTCC,ATCCTCCTCCTCCTCC,A chrIX_139426_G_A chrIX_140602_C_T	381	TRUE	chrIX	128099	140602	12504	*	FALSE	0.134561	chrIX_135577_A_G	YPD;;1	0.0001	0.000100005	50.893	chrIX_138051_G_A_35876	chrIX_137783_G_T_35874	chrIX_140602_C_T_35895	chrIX_138051_G_A	chrIX_137783_G_T
SDS;0.075%;3	YKL201C	MNN4	chrXI	63930	67848	3919	-	0.82831	YPS1009x	increase	0.0463376	0.0891287	chrXI_66702_C_T				0.0007	0.000400125	6.35912	chrXI_51307_T_C_43139	chrXI_42897_A_G_43082	chrXI_68377_G_A_43257	chrXI_51307_T_C	chrXI_42897_A_G	chrXI_68377_G_A	0.157022	0.0268746	chrXI	2.47886e-07	chrXI_44500_C_T chrXI_47435_A_T chrXI_68337_G_A chrXI_71199_T_C	3008	TRUE	chrXI	39003	74277	35275	*	FALSE	0.069466	chrXI_51307_T_C	SDS;0.075%;3	0.0001	0.000100005	25.5006	chrXI_66663_A_G_49905	chrXI_55092_G_A_49831	chrXI_68447_A_G_49955	chrXI_66663_A_G	chrXI_55092_G_A
Methotrexate;0.4mM;2	YOR125C	CAT5	chrXV	558836	559845	1010	-	0.826436	YJM145x	increase	0.0469435	0.215565	chrXV_559459_T_C				0.0001	0.000100005	9.82889	chrXV_570373_A_T_47087	chrXV_497400_T_C_46545	chrXV_578887_G_A_47128	chrXV_570373_A_T	chrXV_497400_T_C	chrXV_578887_G_A	0.170049	0.0321978	chrXV	3.29705e-11	chrXV_553386_C_T chrXV_556870_T_G chrXV_579389_A_G chrXV_582806_T_C	377	TRUE	chrXV	552421	580595	28175	*	FALSE	0.0717373	chrXV_570373_A_T	Methotrexate;0.4mM;2	0.0001	0.000100005	32.786	chrXV_559459_T_C_61134	chrXV_558497_G_A_61133	chrXV_560807_A_G_61143	chrXV_559459_T_C	chrXV_558497_G_A
Lithium_Chloride;100mM;2	YIL129C	TAO3	chrIX	105891	113520	7630	-	0.826115	YJM145x	decrease	0.0475451	0.731627	chrIX_110619_G_A				0.0001	0.000100005	26.6936	chrIX_110619_G_A_23480	chrIX_104484_C_G_23468	chrIX_110628_C_A_23481	chrIX_110619_G_A	chrIX_104484_C_G	chrIX_110628_C_A	-0.230249	0.053854	chrIX	9.97017e-29	chrIX_104484_C_G chrIX_105901_T_C chrIX_110619_G_A chrIX_110619_G_A	377	TRUE	chrIX	103246	120903	17658	*	FALSE	0.350353	chrIX_110619_G_A	Lithium_Chloride;100mM;2	0.0001	0.000100005	76.713	chrIX_101771_A_C_32930	chrIX_101771_A_C_32930	chrIX_102536_CTTTTTT_C,CT,CTT_32936	chrIX_101771_A_C	chrIX_101771_A_C
Lactate;;1	YOR051C	ETT1	chrXV	424731	426427	1697	-	0.824182	YPS163a	increase	0.0481502	0.181075	chrXV_425229_C_T				0.0001	0.000100005	12.9055	chrXV_444439_G_A_60353	chrXV_429660_G_A_60248	chrXV_451172_A_C_60392	chrXV_444439_G_A	chrXV_429660_G_A	chrXV_451172_A_C	0.141107	0.0207828	chrXV	2.5896e-12	chrXV_422078_CT_C chrXV_424216_A_C chrXV_450043_G_A chrXV_453067_C_T	B	TRUE	chrXV	419419	450461	31043	*	FALSE	0.0625698	chrXV_444439_G_A	Lactate;;1	0.0001	0.000100005	14.7543	chrXV_425229_C_T_71377	chrXV_425229_C_T_71377	chrXV_425929_G_A_71387	chrXV_425229_C_T	chrXV_425229_C_T
Cadmium_Chloride;75uM;2	YBR295W	PCA1	chrII	792331	796647	4317	+	0.824176	CLIB219x	increase	0.0487496	0.615385	chrII_795014_T_C,G				0.0001	0.000100005	132.806	chrII_793476_A_C_7604	chrII_793241_A_C_7600	chrII_795014_T_C,G_7616	chrII_793476_A_C	chrII_793241_A_C	chrII_795014_T_C,G	0.498671	0.237245	chrII	2.9692e-134	chrII_793241_A_C chrII_793241_A_C chrII_795259_A_C chrII_795259_A_C	3043	TRUE	chrII	793241	795935	2695	*	FALSE	0.132386	chrII_793476_A_C	Cadmium_Chloride;75uM;2	0.0001	0.000100005	271.833	chrII_795692_C_A_7929	chrII_795354_G_C,A_7925	chrII_796189_G_C_7931	chrII_795692_C_A	chrII_795354_G_C,A
Xylose;;1	YNL085W	MKT1	chrXIV	466886	469837	2952	+	0.824113	BYa	decrease	0.0493437	0.549169	chrXIV_467219_A_G				0.0001	0.000100005	45.9163	chrXIV_467219_A_G_41540	chrXIV_467219_A_G_41540	chrXIV_468488_A_G_41541	chrXIV_467219_A_G	chrXIV_467219_A_G	chrXIV_468488_A_G	0.377811	0.128488	chrXIV	7.80859e-46	chrXIV_466588_T_G chrXIV_466588_T_G chrXIV_468488_A_G chrXIV_469677_A_T	375	TRUE	chrXIV	466588	471767	5180	*	FALSE	0.58516	chrXIV_467219_A_G	Xylose;;1	0.0001	0.000100005	57.7288	chrXIV_469224_A_G_41202	chrXIV_466588_T_G_41198	chrXIV_471767_A_G_41208	chrXIV_469224_A_G	chrXIV_466588_T_G
EtOH_Glucose;;1	YMR164C	MSS11	chrXIII	586831	589794	2964	-	0.822156	YJM981x	increase	0.0499413	0.169791	chrXIII_589215_A_C				0.0001	0.000100005	8.33769	chrXIII_591330_G_A_59252	chrXIII_577768_A_G_59189	chrXIII_621167_C_A_59416	chrXIII_591330_G_A	chrXIII_577768_A_G	chrXIII_621167_C_A	0.166169	0.0354644	chrXIII	2.06868e-09	chrXIII_571457_G_A chrXIII_573793_T_A chrXIII_606299_C_T chrXIII_612492_C_T	3004	TRUE	chrXIII	566257	613158	46902	*	FALSE	0.051009	chrXIII_591330_G_A	EtOH_Glucose;;1	0.0001	0.000100005	18.5333	chrXIII_589213_T_C_28158	chrXIII_588570_CTGCTGTTGATGT_CTGTTGCTGTTGATGT,C,CTGT,*_28136	chrXIII_593601_G_A_28178	chrXIII_589213_T_C	chrXIII_588570_CTGCTGTTGATGT_CTGTTGCTGTTGATGT,C,CTGT,*
Copper_Sulfate;;1	YNL085W	MKT1	chrXIV	466886	469837	2952	+	0.822096	BYa	decrease	0.0505338	0.548489	chrXIV_467219_A_G				0.0001	0.000100005	9.53666	chrXIV_467219_A_G_41540	chrXIV_462234_C_T_41533	chrXIV_483243_A_G_41568	chrXIV_467219_A_G	chrXIV_462234_C_T	chrXIV_483243_A_G	0.155429	0.0211138	chrXIV	3.24465e-11	chrXIV_445766_G_A chrXIV_453937_C_T chrXIV_476709_GT_G chrXIV_476709_GT_G	375	TRUE	chrXIV	445766	480527	34762	*	FALSE	0.194915	chrXIV_467219_A_G	Copper_Sulfate;;1	0.0001	0.000100005	73.5716	chrXIV_466588_T_G_41198	chrXIV_466103_G_A_41197	chrXIV_467219_A_G_41200	chrXIV_466588_T_G	chrXIV_466103_G_A
Zeocin;25ug/mL;3	YIR019C	FLO11	chrIX	387636	393964	6329	-	0.819678	YPS1009x	decrease	0.0511319	0.230453	chrIX_393442_G_A				0.0143	0.00425247	10.5259	chrIX_394553_G_A_43698	chrIX_392815_AGGTGTAGGCTTTTCCTTTGTGCATGAGGTAGTGGTTGGG_A_43659	chrIX_397575_C_T_43764	chrIX_394553_G_A	chrIX_392815_AGGTGTAGGCTTTTCCTTTGTGCATGAGGTAGTGGTTGGG_A	chrIX_397575_C_T	-0.223826	0.0246137	chrIX	5.47847e-13	chrIX_388144_A_T chrIX_389872_G_A chrIX_396227_A_T chrIX_397426_G_A	2999	TRUE	chrIX	388144	398084	9941	*	FALSE	0.0555074	chrIX_394553_G_A	Zeocin;25ug/mL;3	0.0001	0.000100005	15.2934	chrIX_393442_G_A_37577	chrIX_388101_A_G_37506	chrIX_393508_T_C_37582	chrIX_393442_G_A	chrIX_388101_A_G
Congo_Red;75ug/mL;3	YJR066W	TOR1	chrX	559287	566922	7636	+	0.818092	Y10x	decrease	0.0517317	0.0455832	chrX_556081_A_G				0.0007	0.000300085	6.8635	chrX_540773_A_T_51227	chrX_528849_G_A_51113	chrX_563819_G_T_51385	chrX_540773_A_T	chrX_528849_G_A	chrX_563819_G_T	-0.187075	0.0400188	chrX	1.93682e-08	chrX_521802_T_C chrX_524098_A_T chrX_540790_G_C,T chrX_540790_G_C,T	3001	TRUE	chrX	530814	563819	33006	*	FALSE	0.00554897	chrX_540773_A_T	Congo_Red;75ug/mL;3	0.0001	0.000100005	10.9365	chrX_556081_A_G_38785	chrX_556081_A_G_38785	chrX_621323_G_A_39231	chrX_556081_A_G	chrX_556081_A_G
Fructose;;1	YMR165C	PAH1	chrXIII	589795	592996	3202	-	0.817411	YPS1009x	decrease	0.0523293	0.10056	chrXIII_592200_C_T				0.0001	0.000100005	9.24938	chrXIII_592096_G_A_56970	chrXIII_586154_T_A_56918	chrXIII_592777_A_ACACAAGC_56978	chrXIII_592096_G_A	chrXIII_586154_T_A	chrXIII_592777_A_ACACAAGC	-0.159272	0.0250148	chrXIII	2.49997e-11	chrXIII_574908_T_C chrXIII_578710_A_T chrXIII_603572_T_C chrXIII_607553_C_T	3008	TRUE	chrXIII	566969	600972	34004	*	FALSE	0.0787402	chrXIII_592096_G_A	Fructose;;1	0.0001	0.000100005	12.7981	chrXIII_590607_C_T_64733	chrXIII_589360_A_C_64721	chrXIII_640365_G_A_65084	chrXIII_590607_C_T	chrXIII_589360_A_C
Glycerol;;1	YIR020C-B		chrIX	396187	397948	1762	-	0.816069	YPS1009x	decrease	0.0529275	0.376494	chrIX_396227_A_T				0.0001	0.000100005	13.1774	chrIX_393373_G_A_37572	chrIX_393165_T_G_37560	chrIX_393634_A_G_37587	chrIX_393373_G_A	chrIX_393165_T_G	chrIX_393634_A_G	-0.243695	0.0558166	chrIX	3.91447e-15	chrIX_385638_CAA_C,CA chrIX_386815_G_A chrIX_396227_A_T chrIX_397464_T_A	3008	TRUE	chrIX	368217	397249	29033	*	FALSE	0.0913784	chrIX_393373_G_A	Glycerol;;1	0.0001	0.000100005	34.2375	chrIX_396227_A_T_43739	chrIX_394651_C_T_43701	chrIX_397439_C_A_43763	chrIX_396227_A_T	chrIX_394651_C_T
Mannose;;1	YBR141C	BMT2	chrII	526826	528037	1212	-	0.814918	Y10x	decrease	0.0535254	0.26014	chrII_527601_G_A				0.0001	0.000100005	14.6509	chrII_526608_T_C,A_4694	chrII_516986_G_A_4664	chrII_533767_T_C_4769	chrII_526608_T_C,A	chrII_516986_G_A	chrII_533767_T_C	-0.216535	0.0440997	chrII	1.05205e-16	chrII_514468_C_T chrII_516986_G_A chrII_538014_C_T chrII_539908_G_A	3000	TRUE	chrII	516986	535775	18790	*	FALSE	0.0638064	chrII_526608_T_C,A	Mannose;;1	0.0001	0.000100005	18.5031	chrII_527516_C_T_6685	chrII_517214_C_G_6539	chrII_528018_C_T_6691	chrII_527516_C_T	chrII_517214_C_G
Diamide;1.5mM;3	YOR101W	RAS1	chrXV	514761	516297	1537	+	0.813923	YJM454a	decrease	0.0541225	0.0696126	chrXV_514910_GAA_G,GA,GAAAA				0.0002	0.000112507	6.09121	chrXV_515780_T_C_68183	chrXV_488252_G_A_67932	chrXV_539640_A_C_68448	chrXV_515780_T_C	chrXV_488252_G_A	chrXV_539640_A_C	0.163362	0.0254334	chrXV	3.80068e-10	chrXV_495846_G_A chrXV_501220_C_T chrXV_533639_C_CTAG chrXV_538068_G_C	3008	TRUE	chrXV	507795	526628	18834	*	FALSE	0.0520382	chrXV_515780_T_C	Diamide;1.5mM;3	0.0001	0.000100005	13.4059	chrXV_514910_GAA_G,GA,GAAAA_50819	chrXV_495846_G_A_50730	chrXV_529863_G_A_51019	chrXV_514910_GAA_G,GA,GAAAA	chrXV_495846_G_A
EGTA;5mM;3	YPL092W	SSU1	chrXVI	373357	375334	1978	+	0.813601	M22	increase	0.0547157	0.759283	chrXVI_374061_A_G				0.0001	0.000100005	44.6836	chrXVI_375193_A_T_48465	chrXVI_373946_G_A_48462	chrXVI_376312_G_A_48473	chrXVI_375193_A_T	chrXVI_373946_G_A	chrXVI_376312_G_A	0.451497	0.120203	chrXVI	9.00436e-47	chrXVI_373946_G_A chrXVI_374261_C_T chrXVI_378640_G_T chrXVI_379192_T_C	375	TRUE	chrXVI	373946	378951	5006	*	FALSE	0.153569	chrXVI_375193_A_T	EGTA;5mM;3	0.0001	0.000100005	111.953	chrXVI_373699_GC_G_86334	chrXVI_373699_GC_G_86334	chrXVI_374149_C_T_86337	chrXVI_373699_GC_G	chrXVI_373699_GC_G
Fructose;;1	YIR020W-A		chrIX	394737	396186	1450	+	0.81058	YPS1009x	decrease	0.055317	0.320791	chrIX_395693_T_C				0.0001	0.000100005	20.0414	chrIX_395693_T_C_37640	chrIX_387779_G_A_37489	chrIX_397249_A_G_37684	chrIX_395693_T_C	chrIX_387779_G_A	chrIX_397249_A_G	-0.218432	0.056517	chrIX	3.87053e-20	chrIX_385134_G_T chrIX_387314_T_C chrIX_397162_C_T chrIX_398115_G_T	3008	TRUE	chrIX	387779	397464	9686	*	FALSE	0.103712	chrIX_395693_T_C	Fructose;;1	0.0001	0.000100005	38.5764	chrIX_394958_CT_C_43710	chrIX_392815_AGGTGTAGGCTTTTCCTTTGTGCATGAGGTAGTGGTTGGG_A_43659	chrIX_397439_C_A_43763	chrIX_394958_CT_C	chrIX_392815_AGGTGTAGGCTTTTCCTTTGTGCATGAGGTAGTGGTTGGG_A
Formamide;2%;2	YMR165C	PAH1	chrXIII	589795	592996	3202	-	0.809036	YPS1009x	decrease	0.0559199	0.158727	chrXIII_590222_T_C				0.0001	0.000100005	15.3448	chrXIII_590222_T_C_56956	chrXIII_589360_A_C_56948	chrXIII_591330_G_A_56965	chrXIII_590222_T_C	chrXIII_589360_A_C	chrXIII_591330_G_A	-0.225487	0.0441581	chrXIII	5.55784e-17	chrXIII_583069_G_A chrXIII_587257_T_G chrXIII_595882_G_A chrXIII_602082_C_T	3008	TRUE	chrXIII	581540	595305	13766	*	FALSE	0.114569	chrXIII_590222_T_C	Formamide;2%;2	0.0001	0.000100005	31.5836	chrXIII_589360_A_C_64721	chrXIII_589360_A_C_64721	chrXIII_590621_T_C_64734	chrXIII_589360_A_C	chrXIII_589360_A_C
Fructose;;1	YIL165C		chrIX	33142	34081	940	-	0.802781	YPS163a	decrease	0.0565451	0.26633	chrIX_33244_T_C				0.0001	0.000100005	28.9506	chrIX_29700_A_T,C_32492	chrIX_70_C_CCACCACACCCACACCCACACACCCACACACACACACCCA_32378	chrIX_34647_A_G_32574	chrIX_29700_A_T,C	chrIX_70_C_CCACCACACCCACACCCACACACCCACACACACACACCCA	chrIX_34647_A_G	-0.245274	0.0365775	chrIX	1.03334e-32	chrIX_264_T_C chrIX_264_T_C chrIX_34351_A_G chrIX_35042_C_T	B	TRUE	chrIX	264	32147	31884	*	FALSE	0.0196049	chrIX_29700_A_T,C	Fructose;;1	0.0001	0.000100005	25.4114	chrIX_33244_T_C_37650	chrIX_8158_T_C_37474	chrIX_35983_C_T_37699	chrIX_33244_T_C	chrIX_8158_T_C
SDS;0.075%;3	YGR014W	MSB2	chrVII	516679	520975	4297	+	0.801881	CLIB413a	decrease	0.0571688	0.400941	chrVII_517914_G_T				0.007	0.00166503	7.08162	chrVII_513785_C_T,A_18817	chrVII_491626_A_G_18778	chrVII_558728_A_G_18927	chrVII_513785_C_T,A	chrVII_491626_A_G	chrVII_558728_A_G	0.165269	0.0240761	chrVII	1.29272e-08	chrVII_488375_C_T chrVII_491626_A_G chrVII_528947_ATT_ATTT,ACTT,A chrVII_532878_A_T	377	TRUE	chrVII	488375	526005	37631	*	FALSE	0.0993333	chrVII_513785_C_T,A	SDS;0.075%;3	0.0001	0.000100005	23.8387	chrVII_517812_C_T_29849	chrVII_485156_T_C_29671	chrVII_522374_G_A_29873	chrVII_517812_C_T	chrVII_485156_T_C
YPD;15;1	YIR020W-A		chrIX	394737	396186	1450	+	0.799641	YPS1009x	decrease	0.0577968	0.211659	chrIX_395693_T_C				0.0045	0.00235509	4.98517	chrIX_395693_T_C_37640	chrIX_330475_A_G_37120	chrIX_412806_C_T_37804	chrIX_395693_T_C	chrIX_330475_A_G	chrIX_412806_C_T	-0.154618	0.0272808	chrIX	2.70047e-06	chrIX_375832_G_A,* chrIX_379829_T_TA chrIX_404537_T_C chrIX_409868_C_T	3008	TRUE	chrIX	386347	398653	12307	*	FALSE	0.0390625	chrIX_395693_T_C	YPD;15;1	0.0001	0.000100005	18.2929	chrIX_395469_T_C_43722	chrIX_393583_GGAT_G_43688	chrIX_396649_G_C_43749	chrIX_395469_T_C	chrIX_393583_GGAT_G
Glycerol;;1	YOR125C	CAT5	chrXV	558836	559845	1010	-	0.799443	YJM145x	decrease	0.0584202	0.509749	chrXV_559546_G_A				0.0001	0.000100005	39.1994	chrXV_556870_T_G_47007	chrXV_555261_A_G_47005	chrXV_564575_C_T_47054	chrXV_556870_T_G	chrXV_555261_A_G	chrXV_564575_C_T	-0.383447	0.156323	chrXV	7.5278e-40	chrXV_554687_CT_C chrXV_554987_C_T chrXV_562357_G_A chrXV_564278_T_C	377	TRUE	chrXV	552775	563766	10992	*	FALSE	0.229547	chrXV_556870_T_G	Glycerol;;1	0.0001	0.000100005	73.1381	chrXV_559459_T_C_61134	chrXV_559459_T_C_61134	chrXV_559768_T_G_61138	chrXV_559459_T_C	chrXV_559459_T_C
Cobalt_Chloride;2mM;2	YOR316C	COT1	chrXV	906018	907639	1622	-	0.795136	273614xa	decrease	0.059057	0.397568	chrXV_907234_CG_C				0.0001	0.000100005	31.3111	chrXV_907181_C_A_33214	chrXV_907000_T_C_33212	chrXV_911999_T_C_33226	chrXV_907181_C_A	chrXV_907000_T_C	chrXV_911999_T_C	0.211336	0.0386812	chrXV	8.66133e-34	chrXV_901371_G_C chrXV_905044_T_C chrXV_909866_A_G chrXV_911999_T_C	3003	TRUE	chrXV	907000	909076	2077	*	FALSE	0.125838	chrXV_907181_C_A	Cobalt_Chloride;2mM;2	0.0001	0.000100005	100.777	chrXV_907197_A_G_74542	chrXV_906602_A_G_74538	chrXV_907892_C_T_74548	chrXV_907197_A_G	chrXV_906602_A_G
6-azauracil;50ug/mL;3	YIL119C	RPI1	chrIX	136381	138813	2433	-	0.788086	YJM454a	decrease	0.0597187	0.186238	chrIX_138203_A_G				0.0001	0.000100005	15.8745	chrIX_134734_A_G_26314	chrIX_125523_T_C_26257	chrIX_141727_T_C_26353	chrIX_134734_A_G	chrIX_125523_T_C	chrIX_141727_T_C	0.221518	0.0449513	chrIX	9.20562e-17	chrIX_120835_A_G chrIX_125523_T_C chrIX_141212_T_C chrIX_142765_T_C	381	TRUE	chrIX	118294	149018	30725	*	FALSE	0.0794104	chrIX_134734_A_G	6-azauracil;50ug/mL;3	0.0001	0.000100005	26.5266	chrIX_138051_G_A_35876	chrIX_137062_A_G_35858	chrIX_143458_C_A_35932	chrIX_138051_G_A	chrIX_137062_A_G
Trehalose;;1	YJL008C	CCT8	chrX	419957	422179	2223	-	0.786023	YJM981x	increase	0.0603836	0.19722	chrX_420497_G_C				0.0001	0.000100005	17.6743	chrX_420497_G_C_20274	chrX_416075_G_T_20250	chrX_443738_A_C_20400	chrX_420497_G_C	chrX_416075_G_T	chrX_443738_A_C	0.281874	0.0776967	chrX	2.49115e-19	chrX_409661_T_C chrX_411303_G_A chrX_442545_G_A chrX_444865_G_A	3003	TRUE	chrX	414944	444865	29922	*	FALSE	0.0537996	chrX_420497_G_C	Trehalose;;1	0.0001	0.000100005	38.8083	chrX_421370_G_A_43021	chrX_410980_T_C_42965	chrX_442545_G_A_43119	chrX_421370_G_A	chrX_410980_T_C
Zeocin;25ug/mL;3	YLR257W		chrXII	655632	660252	4621	+	0.784111	BYa	decrease	0.061051	0.0709471	chrXII_657181_A_C				0.0001	0.000100005	23.0247	chrXII_648877_T_C_34140	chrXII_646385_GA_GAAA,GAAAA,G,GAA_34127	chrXII_657631_C_T_34177	chrXII_648877_T_C	chrXII_646385_GA_GAAA,GAAAA,G,GAA	chrXII_657631_C_T	0.230346	0.0742731	chrXII	2.92524e-24	chrXII_643838_G_A chrXII_644385_A_AC chrXII_659769_C_T chrXII_664658_G_A	375	TRUE	chrXII	646385	658054	11670	*	FALSE	0.044759	chrXII_648877_T_C	Zeocin;25ug/mL;3	0.0001	0.000100005	65.603	chrXII_656891_G_A_33805	chrXII_646385_GA_GAAA,GAAAA,G,GAA_33767	chrXII_657926_GTTT_GTT,GT,G_33834	chrXII_656891_G_A	chrXII_646385_GA_GAAA,GAAAA,G,GAA
Raffinose;;1	YLL008W	DRS1	chrXII	131571	134143	2573	+	0.783634	Y10x	decrease	0.0617147	0.538141	chrXII_133849_A_G				0.0001	0.000100005	13.6695	chrXII_133849_A_G_44854	chrXII_129169_GAA_GAAA,G,GA_44835	chrXII_147475_T_C_44892	chrXII_133849_A_G	chrXII_129169_GAA_GAAA,G,GA	chrXII_147475_T_C	-0.203694	0.0395487	chrXII	3.53911e-16	chrXII_130729_C_T chrXII_131468_G_A chrXII_145042_G_T chrXII_148033_A_G	3000	TRUE	chrXII	132472	151983	19512	*	FALSE	0.117861	chrXII_133849_A_G	Raffinose;;1	0.0001	0.000100005	13.0293	chrXII_131340_A_G_59543	chrXII_130217_G_A_59531	chrXII_132151_A_G_59555	chrXII_131340_A_G	chrXII_130217_G_A
Cadmium_Chloride;75uM;2	YBR295W	PCA1	chrII	792331	796647	4317	+	0.78083	YPS163a	increase	0.0623847	0.0603717	chrII_794038_A_G				0.0001	0.000100005	9.6715	chrII_798480_A_G_6990	chrII_796912_G_A_6972	chrII_799317_A_T_6999	chrII_798480_A_G	chrII_796912_G_A	chrII_799317_A_T	0.165757	0.0355795	chrII	8.35362e-11	chrII_786589_T_G chrII_789465_G_A chrII_799572_A_G chrII_799796_A_G	376	TRUE	chrII	794038	809685	15648	*	FALSE	0.0218194	chrII_798480_A_G	Cadmium_Chloride;75uM;2	0.0001	0.000100005	40.1901	chrII_793881_C_T_6298	chrII_793772_A_G_6297	chrII_798262_T_C_6363	chrII_793881_C_T	chrII_793772_A_G
Xylose;;1	YIR020W-A		chrIX	394737	396186	1450	+	0.779304	I14a	increase	0.0630556	0.17033	chrIX_395469_T_C				0.0001	0.000100005	14.5432	chrIX_384315_CA_C,CAA,CAAAA_35307	chrIX_382528_C_T_35277	chrIX_397113_T_A_35437	chrIX_384315_CA_C,CAA,CAAAA	chrIX_382528_C_T	chrIX_397113_T_A	-0.218222	0.0528208	chrIX	7.1671e-16	chrIX_381525_C_G chrIX_383533_A_G chrIX_393995_A_G chrIX_395123_T_C	3000	TRUE	chrIX	377556	394739	17184	*	FALSE	0.120385	chrIX_384315_CA_C,CAA,CAAAA	Xylose;;1	0.0001	0.000100005	26.9118	chrIX_395469_T_C_43722	chrIX_394553_G_A_43698	chrIX_397575_C_T_43764	chrIX_395469_T_C	chrIX_394553_G_A
Trehalose;;1	YIL116W	HIS5	chrIX	142248	144175	1928	+	0.778409	YJM454a	decrease	0.0637245	0.38474	chrIX_142542_T_C				0.0001	0.000100005	20.8212	chrIX_134734_A_G_26314	chrIX_127686_T_A_26271	chrIX_137343_G_T_26332	chrIX_134734_A_G	chrIX_127686_T_A	chrIX_137343_G_T	0.272025	0.0709658	chrIX	1.34454e-22	chrIX_123055_C_T chrIX_125523_T_C chrIX_139426_G_A chrIX_141644_T_C	381	TRUE	chrIX	123055	138686	15632	*	FALSE	0.131538	chrIX_134734_A_G	Trehalose;;1	0.0001	0.000100005	25.3319	chrIX_142542_T_C_35918	chrIX_142390_C_T_35913	chrIX_143038_T_C_35930	chrIX_142542_T_C	chrIX_142390_C_T
Mannose;;1	YIL166C		chrIX	28522	33141	4620	-	0.776055	YPS163a	decrease	0.0643977	0.11135	chrIX_32483_C_T,CT				0.0001	0.000100005	18.1199	chrIX_29700_A_T,C_32492	chrIX_70_C_CCACCACACCCACACCCACACACCCACACACACACACCCA_32378	chrIX_36103_G_A_32594	chrIX_29700_A_T,C	chrIX_70_C_CCACCACACCCACACCCACACACCCACACACACACACCCA	chrIX_36103_G_A	-0.203482	0.0253353	chrIX	3.51577e-21	chrIX_264_T_C chrIX_8164_G_A,* chrIX_35312_G_A chrIX_35983_C_T	B	TRUE	chrIX	264	33018	32755	*	FALSE	0.0118461	chrIX_29700_A_T,C	Mannose;;1	0.0001	0.000100005	17.8847	chrIX_32483_C_T,CT_37632	chrIX_29410_G_A_37595	chrIX_33054_G_GAA_37644	chrIX_32483_C_T,CT	chrIX_29410_G_A
6-azauracil;50ug/mL;3	YMR164C	MSS11	chrXIII	586831	589794	2964	-	0.772371	M22	increase	0.0650807	0.14877	chrXIII_587559_T_G				0.0001	0.000100005	9.23397	chrXIII_591330_G_A_39395	chrXIII_587493_T_G_39354	chrXIII_600819_C_T_39429	chrXIII_591330_G_A	chrXIII_587493_T_G	chrXIII_600819_C_T	0.165143	0.0347132	chrXIII	8.11197e-11	chrXIII_572799_A_G chrXIII_577405_C_T chrXIII_600354_A_G chrXIII_602255_G_A	375	TRUE	chrXIII	576343	605048	28706	*	FALSE	0.0663034	chrXIII_591330_G_A	6-azauracil;50ug/mL;3	0.0001	0.000100005	33.766	chrXIII_587257_T_G_66655	chrXIII_579297_G_C_66630	chrXIII_589690_G_T_66691	chrXIII_587257_T_G	chrXIII_579297_G_C
Fructose;;1	YIL119C	RPI1	chrIX	136381	138813	2433	-	0.772257	YJM454a	decrease	0.0657584	0.398551	chrIX_138203_A_G				0.0001	0.000100005	38.9198	chrIX_139426_G_A_26341	chrIX_134734_A_G_26314	chrIX_141212_T_C_26348	chrIX_139426_G_A	chrIX_134734_A_G	chrIX_141212_T_C	0.330364	0.0949207	chrIX	1.81497e-39	chrIX_131834_C_T chrIX_135577_A_G chrIX_140602_C_T chrIX_141332_C_T	381	TRUE	chrIX	135577	139466	3890	*	FALSE	0.227573	chrIX_139426_G_A	Fructose;;1	0.0001	0.000100005	66.5969	chrIX_138051_G_A_35876	chrIX_137062_A_G_35858	chrIX_140226_A_T_35894	chrIX_138051_G_A	chrIX_137062_A_G
Congo_Red;75ug/mL;3	YIR020W-A		chrIX	394737	396186	1450	+	0.772222	YPS1009x	decrease	0.0664307	0.27	chrIX_394958_CT_C				0.0001	0.000100005	13.4966	chrIX_399609_A_C_37698	chrIX_387531_T_C_37480	chrIX_407301_C_T_37745	chrIX_399609_A_C	chrIX_387531_T_C	chrIX_407301_C_T	-0.20317	0.0434928	chrIX	2.19198e-14	chrIX_389779_T_C chrIX_395522_C_T chrIX_403404_C_T chrIX_406827_T_C	3008	TRUE	chrIX	385134	409958	24825	*	FALSE	0.133808	chrIX_399609_A_C	Congo_Red;75ug/mL;3	0.0001	0.000100005	26.315	chrIX_394958_CT_C_43710	chrIX_392815_AGGTGTAGGCTTTTCCTTTGTGCATGAGGTAGTGGTTGGG_A_43659	chrIX_397575_C_T_43764	chrIX_394958_CT_C	chrIX_392815_AGGTGTAGGCTTTTCCTTTGTGCATGAGGTAGTGGTTGGG_A
Fructose;;1	YOR125C	CAT5	chrXV	558836	559845	1010	-	0.771946	YJM145x	decrease	0.0670986	0.27156	chrXV_559546_G_A				0.0001	0.000100005	11.0082	chrXV_560610_A_G_47028	chrXV_556870_T_G_47007	chrXV_564575_C_T_47054	chrXV_560610_A_G	chrXV_556870_T_G	chrXV_564575_C_T	-0.244629	0.177323	chrXV	4.178e-12	chrXV_553950_C_T chrXV_554987_C_T chrXV_567496_T_C chrXV_571256_A_C	377	TRUE	chrXV	553072	572170	19099	*	FALSE	0.121705	chrXV_560610_A_G	Fructose;;1	0.0001	0.000100005	102.705	chrXV_559459_T_C_61134	chrXV_559459_T_C_61134	chrXV_559768_T_G_61138	chrXV_559459_T_C	chrXV_559459_T_C
Fluconazole;100uM;2	YBL005W	PDR3	chrII	217165	220864	3700	+	0.771638	273614xa	decrease	0.0677622	0.371753	chrII_218414_A_C				0.0001	0.000100005	11.1601	chrII_238524_C_T_1541	chrII_218414_A_C_1526	chrII_250482_C_A_1552	chrII_238524_C_T	chrII_218414_A_C	chrII_250482_C_A	0.185929	0.0609576	chrII	1.18099e-12	chrII_218414_A_C chrII_220381_C_T chrII_246816_G_A chrII_250466_A_G	3003	TRUE	chrII	220381	246816	26436	*	FALSE	0.148936	chrII_238524_C_T	Fluconazole;100uM;2	0.0001	0.000100005	30.9978	chrII_218414_A_C_3918	chrII_218414_A_C_3918	chrII_218630_C_T_3920	chrII_218414_A_C	chrII_218414_A_C
Fructose;;1	YBR141C	BMT2	chrII	526826	528037	1212	-	0.76946	Y10x	decrease	0.0684293	0.252983	chrII_527601_G_A				0.0001	0.000100005	17.3126	chrII_526608_T_C,A_4694	chrII_510026_T_C_4642	chrII_533330_T_A_4762	chrII_526608_T_C,A	chrII_510026_T_C	chrII_533330_T_A	-0.216749	0.0460667	chrII	8.08276e-19	chrII_515157_G_A chrII_520435_G_A chrII_537038_C_G chrII_539056_C_T	3000	TRUE	chrII	516986	533504	16519	*	FALSE	0.0762016	chrII_526608_T_C,A	Fructose;;1	0.0001	0.000100005	20.0289	chrII_527516_C_T_6685	chrII_526731_C_G_6678	chrII_527601_G_A_6688	chrII_527516_C_T	chrII_526731_C_G
Glycerol;;1	YOR043W	WHI2	chrXV	410265	412667	2403	+	0.767838	CLIB219x	increase	0.0690976	0.190806	chrXV_410684_C_T				0.0001	0.000100005	45.8415	chrXV_412468_A_G_78796	chrXV_412177_C_T_78793	chrXV_412559_T_C_78801	chrXV_412468_A_G	chrXV_412177_C_T	chrXV_412559_T_C	-0.293965	0.0700049	chrXV	3.80909e-49	chrXV_408874_A_G chrXV_410684_C_T chrXV_415943_C_T chrXV_418571_G_A	3028	TRUE	chrXV	410684	416186	5503	*	FALSE	0.0951456	chrXV_412504_A_G,*	Glycerol;;1	0.0001	0.000100005	72.82	chrXV_410166_G_A_66514	chrXV_410166_G_A_66514	chrXV_412951_T_A_66532	chrXV_410166_G_A	chrXV_410166_G_A
Mannose;;1	YBR141W-A		chrII	527167	527788	622	+	0.766247	Y10x	decrease	0.0697669	0.26014	chrII_527601_G_A				0.0001	0.000100005	14.6509	chrII_526608_T_C,A_4694	chrII_516986_G_A_4664	chrII_533767_T_C_4769	chrII_526608_T_C,A	chrII_516986_G_A	chrII_533767_T_C	-0.216535	0.0440997	chrII	1.05205e-16	chrII_514468_C_T chrII_516986_G_A chrII_538014_C_T chrII_539908_G_A	3000	TRUE	chrII	516986	535775	18790	*	FALSE	0.0638064	chrII_526608_T_C,A	Mannose;;1	0.0001	0.000100005	18.5031	chrII_527516_C_T_6685	chrII_517214_C_G_6539	chrII_528018_C_T_6691	chrII_527516_C_T	chrII_517214_C_G
EGTA;5mM;3	YLR214W	FRE1	chrXII	568244	570700	2457	+	0.764628	I14a	decrease	0.0704374	0.49734	chrXII_570032_G_A				0.0001	0.000100005	10.1506	chrXII_557852_G_A_47184	chrXII_554190_C_A_47160	chrXII_574945_C_T_47272	chrXII_557852_G_A	chrXII_554190_C_A	chrXII_574945_C_T	0.164774	0.0335296	chrXII	4.05297e-12	chrXII_544777_A_AAAG chrXII_549170_C_T chrXII_570032_G_A chrXII_575228_G_A	3000	TRUE	chrXII	546726	571809	25084	*	FALSE	0.0564455	chrXII_557852_G_A	EGTA;5mM;3	0.0001	0.000100005	48.7772	chrXII_570032_G_A_58167	chrXII_567173_T_C_58158	chrXII_572186_A_G_58181	chrXII_570032_G_A	chrXII_567173_T_C
Caffeine;15mM;2	YGL011C	SCL1	chrVII	474382	475395	1014	-	0.761213	RMx	decrease	0.0711162	0.127138	chrVII_474798_C_T				0.0001	0.000100005	25.6456	chrVII_474708_T_C_17593	chrVII_468710_A_G_17566	chrVII_479063_T_C_17609	chrVII_474708_T_C	chrVII_468710_A_G	chrVII_479063_T_C	-0.165761	0.0202388	chrVII	6.19609e-31	chrVII_471518_G_T chrVII_472609_A_G chrVII_480612_A_G chrVII_482923_G_A	A	TRUE	chrVII	473949	476820	2872	*	FALSE	0.0809035	chrVII_474708_T_C	Caffeine;15mM;2	0.0002	0.00014287	9.46897	chrVII_465091_T_C_29518	chrVII_459752_C_CT,CTT_29495	chrVII_465118_T_C_29520	chrVII_465091_T_C	chrVII_459752_C_CT,CTT
6-azauracil;50ug/mL;3	YIR019C	FLO11	chrIX	387636	393964	6329	-	0.760455	YPS1009x	decrease	0.0717927	0.149815	chrIX_393247_C_T				0.0001	0.000100005	27.3379	chrIX_394958_CT_C_43710	chrIX_393780_AT_A_43690	chrIX_397162_C_T_43757	chrIX_394958_CT_C	chrIX_393780_AT_A	chrIX_397162_C_T	-0.260123	0.0591034	chrIX	2.39984e-27	chrIX_388352_NA_DEL chrIX_390340_C_T chrIX_396773_T_A chrIX_397439_C_A	2999	TRUE	chrIX	388144	396504	8361	*	FALSE	0.0589849	chrIX_394958_CT_C	6-azauracil;50ug/mL;3	0.0001	0.000100005	40.6355	chrIX_393247_C_T_37563	chrIX_387891_A_G_37495	chrIX_393949_C_T_37595	chrIX_393247_C_T	chrIX_387891_A_G
Glycerol;;1	YNL139C	THO2	chrXIV	360924	365874	4951	-	0.760329	YJM145x	decrease	0.0724642	0.250828	chrXIV_364987_G_A				0.0001	0.000100005	15.157	chrXIV_366054_C_T_42758	chrXIV_354740_A_G_42663	chrXIV_367094_G_A_42767	chrXIV_366054_C_T	chrXIV_354740_A_G	chrXIV_367094_G_A	-0.23487	0.0458372	chrXIV	9.40974e-17	chrXIV_356010_C_T,* chrXIV_358013_T_C chrXIV_368045_C_T chrXIV_368706_A_G	377	TRUE	chrXIV	357333	369651	12319	*	FALSE	0.203753	chrXIV_366054_C_T	Glycerol;;1	0.0001	0.000100005	50.8452	chrXIV_364011_C_A,T_54857	chrXIV_358757_C_T_54820	chrXIV_364987_G_A_54861	chrXIV_364011_C_A,T	chrXIV_358757_C_T
Zeocin;25ug/mL;3	YPL183C	RTT10	chrXVI	199435	202920	3486	-	0.753296	CLIB219x	increase	0.0731584	0.640301	chrXVI_199941_C_G,T				0.0001	0.000100005	12.4914	chrXVI_199941_C_G,T_85215	chrXVI_186760_C_T_85133	chrXVI_214236_CA_C_85308	chrXVI_199941_C_G,T	chrXVI_186760_C_T	chrXVI_214236_CA_C	-0.173783	0.0273244	chrXVI	1.1421e-14	chrXVI_197285_A_G chrXVI_199685_A_G chrXVI_200431_C_T chrXVI_202057_A_G	3028	TRUE	chrXVI	181857	203786	21930	*	FALSE	0.576271	chrXVI_199941_C_G,T	Zeocin;25ug/mL;3	0.0001	0.000100005	28.1982	chrXVI_208615_A_G_71829	chrXVI_202057_A_G_71796	chrXVI_212295_C_A_71860	chrXVI_208615_A_G	chrXVI_202057_A_G
Methotrexate;0.4mM;2	YOR162C	YRR1	chrXV	639413	642365	2953	-	0.753176	PW5a	decrease	0.0738475	0.117023	chrXV_641883_C_A				0.0003	0.000171447	8.10083	chrXV_641883_C_A_85018	chrXV_638644_T_TA_84967	chrXV_649497_A_G_85077	chrXV_641883_C_A	chrXV_638644_T_TA	chrXV_649497_A_G	0.155046	0.0257545	chrXV	5.59759e-09	chrXV_631072_T_G chrXV_636664_G_T chrXV_653904_G_A chrXV_656389_C_T	3001	TRUE	chrXV	633979	655286	21308	*	FALSE	0.0529842	chrXV_641883_C_A	Methotrexate;0.4mM;2	0.0001	0.000100005	18.4295	chrXV_639749_A_C_73067	chrXV_638908_G_GA_73039	chrXV_641914_T_C_73100	chrXV_639749_A_C	chrXV_638908_G_GA
Magnesium_Chloride;;1	YBR141C	BMT2	chrII	526826	528037	1212	-	0.750769	Y10x	decrease	0.0745407	0.190892	chrII_527601_G_A				0.0001	0.000100005	17.3398	chrII_527516_C_T_6685	chrII_520657_T_C_6584	chrII_528018_C_T_6691	chrII_527516_C_T	chrII_520657_T_C	chrII_528018_C_T	-0.272596	0.0622859	chrII	3.04777e-19	chrII_513050_G_A chrII_517869_G_A chrII_532298_A_T chrII_533441_T_G	3001	TRUE	chrII	525429	530998	5570	*	FALSE	0.135838	chrII_527516_C_T	Magnesium_Chloride;;1	0.0001	0.000100005	23.0672	chrII_526608_T_C,A_4694	chrII_498500_T_C_4555	chrII_528793_T_C_4709	chrII_526608_T_C,A	chrII_498500_T_C
Congo_Red;75ug/mL;3	YLL003W	SFI1	chrXII	143062	146165	3104	+	0.750694	Y10x	decrease	0.0752288	0.214583	chrXII_145897_C_T				0.0001	0.000100005	13.4242	chrXII_145897_C_T_44883	chrXII_145897_C_T_44883	chrXII_159604_C_T_44930	chrXII_145897_C_T	chrXII_145897_C_T	chrXII_159604_C_T	-0.288773	0.0300424	chrXII	5.22303e-15	chrXII_137371_A_G chrXII_144276_G_A chrXII_159604_C_T chrXII_162138_T_G	3000	TRUE	chrXII	144276	157854	13579	*	FALSE	0.157573	chrXII_145897_C_T	Congo_Red;75ug/mL;3	0.0001	0.000100005	7.37253	chrXII_131587_GA_G,GAA_59548	chrXII_118381_T_C_59472	chrXII_146347_C_T_59622	chrXII_131587_GA_G,GAA	chrXII_118381_T_C
Neomycin;5mg/mL;2	YDL227C	HO	chrIV	46094	49572	3479	-	0.749857	CBS2888a	increase	0.0759147	0.249952	chrIV_46069_T_C				0.0001	0.000100005	124.713	chrIV_46069_T_C_10108	chrIV_45402_C_G_10105	chrIV_46353_NA_DEL_10121	chrIV_46069_T_C	chrIV_45402_C_G	chrIV_46353_NA_DEL	-0.627894	0.369314	chrIV	2.32457e-128	chrIV_45402_C_G chrIV_45402_C_G chrIV_46069_T_C chrIV_46069_T_C	3004	TRUE	chrIV	46069	46353	285	*	FALSE	0.0694027	chrIV_46069_T_C	Neomycin;5mg/mL;2	0.0001	0.000100005	242.786	chrIV_46064_A_C_10040	chrIV_46064_A_C_10040	chrIV_48489_T_C_10055	chrIV_46064_A_C	chrIV_46064_A_C
Methotrexate;0.4mM;2	YOR165W	SEY1	chrXV	644449	647010	2562	+	0.743586	YPS1009x	increase	0.0766198	0.335162	chrXV_646392_A_C				0.0001	0.000100005	12.9512	chrXV_643340_G_C_77164	chrXV_640558_G_T_77149	chrXV_658992_A_G_77236	chrXV_643340_G_C	chrXV_640558_G_T	chrXV_658992_A_G	0.181706	0.0357571	chrXV	4.09987e-14	chrXV_635023_T_C chrXV_637788_A_G chrXV_651841_A_G chrXV_653975_A_T	2999	TRUE	chrXV	641471	653975	12505	*	FALSE	0.0697917	chrXV_643340_G_C	Methotrexate;0.4mM;2	0.0001	0.000100005	21.3062	chrXV_646327_G_A_69096	chrXV_640558_G_T_69054	chrXV_648434_C_T_69114	chrXV_646327_G_A	chrXV_640558_G_T
Raffinose;;1	YJL008C	CCT8	chrX	419957	422179	2223	-	0.742532	YJM981x	increase	0.0773235	0.241858	chrX_421100_G_T				0.0001	0.000100005	12.6056	chrX_436312_A_G_20361	chrX_409193_T_C_20205	chrX_462726_T_C_20504	chrX_436312_A_G	chrX_409193_T_C	chrX_462726_T_C	0.186964	0.0278431	chrX	1.89966e-13	chrX_412914_T_C chrX_414544_T_C chrX_456328_G_A chrX_459766_T_TA	3003	TRUE	chrX	419079	456997	37919	*	FALSE	0.0231629	chrX_436312_A_G	Raffinose;;1	0.0001	0.000100005	74.1182	chrX_420497_G_C_43018	chrX_417194_A_AG_43005	chrX_424906_CT_C,CTTTT,CTTTTT,CTTTTTT,CTTTTTTTT,CTTTTTTTTTTTTTT_43045	chrX_420497_G_C	chrX_417194_A_AG
Cobalt_Chloride;2mM;2	YCL016C	DCC1	chrIII	94445	96021	1577	-	0.742479	BYa	increase	0.0780219	0.183025	chrIII_96019_A_G				0.0001	0.000100005	15.9202	chrIII_95527_T_C_5998	chrIII_93455_A_G_5984	chrIII_101155_C_T_6032	chrIII_95527_T_C	chrIII_93455_A_G	chrIII_101155_C_T	-0.16567	0.0240616	chrIII	1.62928e-17	chrIII_80444_C_T chrIII_81970_G_A chrIII_101527_C_A chrIII_102669_C_T	A	TRUE	chrIII	81970	101597	19628	*	FALSE	0.0691412	chrIII_95527_T_C	Cobalt_Chloride;2mM;2	0.0001	0.000100005	18.0583	chrIII_96019_A_G_6082	chrIII_94470_T_G_6068	chrIII_100653_T_C_6106	chrIII_96019_A_G	chrIII_94470_T_G
YPD;15;1	YIL169C	CSS1	chrIX	20915	28521	7607	-	0.740672	YPS163a	decrease	0.0787219	0.0154307	chrIX_8615_A_G				0.0001	0.000100005	15.4536	chrIX_34647_A_G_32574	chrIX_70_C_CCACCACACCCACACCCACACACCCACACACACACACCCA_32378	chrIX_51640_C_A_32682	chrIX_34647_A_G	chrIX_70_C_CCACCACACCCACACCCACACACCCACACACACACACCCA	chrIX_51640_C_A	-0.242071	0.0338731	chrIX	7.2441e-18	chrIX_29750_C_G chrIX_30792_A_G chrIX_36218_C_T chrIX_37723_G_C,T	B	TRUE	chrIX	8615	36018	27404	*	FALSE	0.0679948	chrIX_34647_A_G	YPD;15;1	0.0001	0.000100005	12.8444	chrIX_8158_T_C_37474	chrIX_8158_T_C_37474	chrIX_33054_G_GAA_37644	chrIX_8158_T_C	chrIX_8158_T_C
Zeocin;25ug/mL;3	YLR215C	CDC123	chrXII	570701	571976	1276	-	0.740483	RMx	increase	0.0794173	0.370126	chrXII_570786_T_C				0.0001	0.000100005	33.0211	chrXII_570676_T_C_33483	chrXII_570032_G_A_33481	chrXII_570914_G_A_33486	chrXII_570676_T_C	chrXII_570032_G_A	chrXII_570914_G_A	0.198468	0.0448999	chrXII	8.88356e-33	chrXII_569539_C_T chrXII_570032_G_A chrXII_571751_T_C chrXII_572164_T_C	A	TRUE	chrXII	570032	572294	2263	*	FALSE	0.235695	chrXII_570676_T_C	Zeocin;25ug/mL;3	0.0001	0.000100005	49.4873	chrXII_570786_T_C_53230	chrXII_570786_T_C_53230	chrXII_571001_C_T_53232	chrXII_570786_T_C	chrXII_570786_T_C
Paraquat;0.75mM;3	YDL058W	USO1	chrIV	345309	351234	5926	+	0.73774	CLIB413a	increase	0.0801179	0.0788913	chrIV_347059_T_C				0.0001	0.000100005	9.24192	chrIV_330985_C_G_7595	chrIV_323677_GATATATATAT_GAT,GATATATATATAT,GATATATAT,G_7564	chrIV_341978_A_C_7670	chrIV_330985_C_G	chrIV_323677_GATATATATAT_GAT,GATATATATATAT,GATATATAT,G	chrIV_341978_A_C	-0.138056	0.0203897	chrIV	7.17154e-12	chrIV_320064_C_T chrIV_323677_GATATATATAT_GAT,GATATATATATAT,GATATATAT,G chrIV_345195_A_G chrIV_347958_T_C	377	TRUE	chrIV	317793	348204	30412	*	FALSE	0.107271	chrIV_330985_C_G	Paraquat;0.75mM;3	0.0001	0.000100005	13.6848	chrIV_346903_T_C_11828	chrIV_344004_GTATATATATATA_GTATATATATATATATATA,G,GTA,GTATA,GTATATATATA,GTATATATATATATA_11804	chrIV_358273_A_C,G_11897	chrIV_346903_T_C	chrIV_344004_GTATATATATATA_GTATATATATATATATATA,G,GTA,GTATA,GTATATATATA,GTATATATATATATA
Magnesium_Chloride;;1	YIL119C	RPI1	chrIX	136381	138813	2433	-	0.736626	YJM454a	decrease	0.0808173	0.352881	chrIX_138203_A_G				0.0001	0.000100005	29.5938	chrIX_139426_G_A_26341	chrIX_133368_C_T_26310	chrIX_141727_T_C_26353	chrIX_139426_G_A	chrIX_133368_C_T	chrIX_141727_T_C	0.274416	0.0715128	chrIX	2.13188e-29	chrIX_127686_T_A chrIX_131694_A_G chrIX_141332_C_T chrIX_142618_G_T	381	TRUE	chrIX	130771	141727	10957	*	FALSE	0.169447	chrIX_139426_G_A	Magnesium_Chloride;;1	0.0001	0.000100005	51.531	chrIX_138051_G_A_35876	chrIX_138051_G_A_35876	chrIX_140742_T_C_35896	chrIX_138051_G_A	chrIX_138051_G_A
Raffinose;;1	YIL166C		chrIX	28522	33141	4620	-	0.73466	YJM978x	decrease	0.0815189	0.213989	chrIX_29543_C_G				0.0001	0.000100005	65.4305	chrIX_29272_A_T_25757	chrIX_179_C_T_25645	chrIX_29781_G_A_25762	chrIX_29272_A_T	chrIX_179_C_T	chrIX_29781_G_A	-0.372401	0.0546577	chrIX	5.40598e-68	chrIX_29044_T_C chrIX_29044_T_C chrIX_30497_C_T chrIX_30497_C_T	381	TRUE	chrIX	179	30858	30680	*	FALSE	0.117486	chrIX_29272_A_T	Raffinose;;1	0.0001	0.000100005	26.1854	chrIX_30792_A_G_37202	chrIX_8147_T_C_37066	chrIX_33247_T_C_37234	chrIX_30792_A_G	chrIX_8147_T_C
Diamide;1.5mM;3	YMR164C	MSS11	chrXIII	586831	589794	2964	-	0.733133	YJM981x	increase	0.082221	0.269231	chrXIII_588807_G_A				0.0001	0.000100005	3.74323	chrXIII_591330_G_A_59252	chrXIII_371798_AT_A_57997	chrXIII_674283_C_T_59661	chrXIII_591330_G_A	chrXIII_371798_AT_A	chrXIII_674283_C_T	0.100576	0.0212296	chrXIII	6.44896e-05	chrXIII_567978_T_C chrXIII_571107_AG_A chrXIII_610070_G_A chrXIII_613737_T_C	3004	TRUE	chrXIII	566257	616262	50006	*	FALSE	0.036533	chrXIII_591330_G_A	Diamide;1.5mM;3	0.0001	0.000100005	15.6468	chrXIII_588702_C_T_28156	chrXIII_587156_C_T_28122	chrXIII_590222_T_C_28166	chrXIII_588702_C_T	chrXIII_587156_C_T
Caffeine;15mM;2	YHR032W	ERC1	chrVIII	173157	175141	1985	+	0.73224	BYa	decrease	0.0829211	0.200972	chrVIII_174970_CA_C				0.0001	0.000100005	30.5706	chrVIII_174970_CA_C_21279	chrVIII_174970_CA_C_21279	chrVIII_177113_C_T_21294	chrVIII_174970_CA_C	chrVIII_174970_CA_C	chrVIII_177113_C_T	0.207735	0.0323249	chrVIII	1.5184e-30	chrVIII_172443_G_A chrVIII_172837_C_G chrVIII_177333_A_G chrVIII_178458_A_G	375	TRUE	chrVIII	160876	184766	23891	*	FALSE	0.19457	chrVIII_174970_CA_C	Caffeine;15mM;2	0.0001	0.000100005	50.6701	chrVIII_173923_T_G_20898	chrVIII_171761_G_T_20879	chrVIII_177113_C_T_20917	chrVIII_173923_T_G	chrVIII_171761_G_T
Galactose;;1	YIL169C	CSS1	chrIX	20915	28521	7607	-	0.732206	YJM978x	decrease	0.0836161	0.0560525	chrIX_29543_C_G				0.0001	0.000100005	31.1993	chrIX_8147_T_C_37066	chrIX_8147_T_C_37066	chrIX_33599_A_T,C_37257	chrIX_8147_T_C	chrIX_8147_T_C	chrIX_33599_A_T,C	-0.219382	0.0455787	chrIX	4.85733e-34	chrIX_8147_T_C chrIX_8147_T_C chrIX_31909_A_G chrIX_32147_G_C	393	TRUE	chrIX	8147	28874	20728	*	FALSE	0.00829876	chrIX_8147_T_C	Galactose;;1	0.0001	0.000100005	31.8808	chrIX_29272_A_T_25757	chrIX_29272_A_T_25757	chrIX_30858_A_AT_25780	chrIX_29272_A_T	chrIX_29272_A_T
Trehalose;;1	YNL132W	KRE33	chrXIV	375006	378628	3623	+	0.731458	YJM454a	decrease	0.0843088	0.242967	chrXIV_377219_T_C				0.0019	0.000416975	7.94998	chrXIV_355032_C_T_61464	chrXIV_276419_T_TTTC_61072	chrXIV_370556_A_G_61557	chrXIV_355032_C_T	chrXIV_276419_T_TTTC	chrXIV_370556_A_G	0.170039	0.0229784	chrXIV	1.38758e-09	chrXIV_336438_TTA_T chrXIV_347518_A_G chrXIV_363393_T_A,G chrXIV_367520_A_G	3008	TRUE	chrXIV	347321	372643	25323	*	FALSE	0.0774732	chrXIV_355032_C_T	Trehalose;;1	0.0001	0.000100005	13.8814	chrXIV_377219_T_C_46096	chrXIV_366310_C_T_46057	chrXIV_379159_T_C_46102	chrXIV_377219_T_C	chrXIV_366310_C_T
Xylose;;1	YLL010C	PSR1	chrXII	129161	130908	1748	-	0.730419	YJM454a	increase	0.0850001	0.228351	chrXII_130614_A_C				0.0001	0.000100005	8.25704	chrXII_130614_A_C_35280	chrXII_129022_A_G_35272	chrXII_159350_A_G_35411	chrXII_130614_A_C	chrXII_129022_A_G	chrXII_159350_A_G	-0.168002	0.0330177	chrXII	6.83864e-10	chrXII_121722_T_C chrXII_127342_C_T,CT,* chrXII_143093_G_A chrXII_145897_C_T	381	TRUE	chrXII	128116	134948	6833	*	FALSE	0.142268	chrXII_130614_A_C	Xylose;;1	0.0001	0.000100005	9.45955	chrXII_132742_T_C_47992	chrXII_131705_A_G_47982	chrXII_139768_C_T_48025	chrXII_132742_T_C	chrXII_131705_A_G
Magnesium_Chloride;;1	YIL169C	CSS1	chrIX	20915	28521	7607	-	0.728009	YJM978x	decrease	0.0856952	0.0681557	chrIX_29543_C_G				0.0001	0.000100005	46.3803	chrIX_29272_A_T_25757	chrIX_29074_T_G_25753	chrIX_29781_G_A_25762	chrIX_29272_A_T	chrIX_29074_T_G	chrIX_29781_G_A	-0.361802	0.0721829	chrIX	1.00701e-47	chrIX_179_C_T chrIX_179_C_T chrIX_31904_G_A chrIX_33211_T_C	381	TRUE	chrIX	179	30858	30680	*	FALSE	0.05624	chrIX_29272_A_T	Magnesium_Chloride;;1	0.0001	0.000100005	49.0949	chrIX_8147_T_C_37066	chrIX_8147_T_C_37066	chrIX_31082_A_T_37212	chrIX_8147_T_C	chrIX_8147_T_C
YPD;15;1	YOR127W	RGA1	chrXV	560923	564333	3411	+	0.726164	CLIB219x	decrease	0.086392	0.281596	chrXV_563470_C_T				0.0001	0.000100005	97.7223	chrXV_563470_C_T_80077	chrXV_562714_C_T_80074	chrXV_563945_A_G_80081	chrXV_563470_C_T	chrXV_562714_C_T	chrXV_563945_A_G	0.540023	0.157979	chrXV	1.95356e-103	chrXV_562082_C_T chrXV_562688_A_C chrXV_563862_A_G chrXV_564154_C_G	3028	TRUE	chrXV	562396	564575	2180	*	FALSE	0.335535	chrXV_563470_C_T	YPD;15;1	0.0001	0.000100005	65.6364	chrXV_565236_A_G_67534	chrXV_565236_A_G_67534	chrXV_565236_A_G_67534	chrXV_565236_A_G	chrXV_565236_A_G
Paraquat;0.75mM;3	YLR215C	CDC123	chrXII	570701	571976	1276	-	0.723806	M22	increase	0.0870924	0.582898	chrXII_570786_T_C				0.0001	0.000100005	25.4962	chrXII_573450_C_T_59200	chrXII_569445_T_C_59173	chrXII_578018_C_T_59221	chrXII_573450_C_T	chrXII_569445_T_C	chrXII_578018_C_T	0.182184	0.0419032	chrXII	2.00937e-26	chrXII_567293_T_C chrXII_571370_G_A chrXII_574714_A_G chrXII_575240_G_T	3028	TRUE	chrXII	567725	575132	7408	*	FALSE	0.243792	chrXII_573450_C_T	Paraquat;0.75mM;3	0.0001	0.000100005	52.1131	chrXII_570676_T_C_33860	chrXII_570032_G_A_33858	chrXII_570914_G_A_33862	chrXII_570676_T_C	chrXII_570032_G_A
EtOH;;1	YNL138W	SRV2	chrXIV	366576	368457	1882	+	0.71831	YJM454a	decrease	0.0878078	0.71831	chrXIV_366762_A_G				0.0001	0.000100005	16.7641	chrXIV_368144_C_A_61545	chrXIV_353690_C_A_61454	chrXIV_375075_A_G_61585	chrXIV_368144_C_A	chrXIV_353690_C_A	chrXIV_375075_A_G	0.205708	0.040569	chrXIV	4.64489e-18	chrXIV_361584_A_G chrXIV_363549_G_A chrXIV_372155_C_T chrXIV_373936_C_A	3008	TRUE	chrXIV	354445	375203	20759	*	FALSE	0.261211	chrXIV_368144_C_A	EtOH;;1	0.0001	0.000100005	55.5655	chrXIV_366552_T_C_46060	chrXIV_366310_C_T_46057	chrXIV_366762_A_G_46062	chrXIV_366552_T_C	chrXIV_366310_C_T
6-azauracil;50ug/mL;3	YMR176W	ECM5	chrXIII	611624	616269	4646	+	0.716129	YJM454a	increase	0.088526	0.135484	chrXIII_613737_T_C				0.0001	0.000100005	11.8566	chrXIII_589690_G_T_56950	chrXIII_587939_A_G_56932	chrXIII_592658_T_G_56974	chrXIII_589690_G_T	chrXIII_587939_A_G	chrXIII_592658_T_G	-0.1895	0.0307056	chrXIII	1.57387e-12	chrXIII_573265_C_CT chrXIII_577405_C_T chrXIII_601700_G_A chrXIII_603801_T_C	3008	TRUE	chrXIII	571078	613737	42660	*	FALSE	0.0586576	chrXIII_589690_G_T	6-azauracil;50ug/mL;3	0.0001	0.000100005	19.5973	chrXIII_613737_T_C_42180	chrXIII_589854_A_G_42004	chrXIII_623049_G_A_42227	chrXIII_613737_T_C	chrXIII_589854_A_G
YPD;37;1	YIL169C	CSS1	chrIX	20915	28521	7607	-	0.715685	YJM978x	decrease	0.0892406	0.039645	chrIX_29543_C_G				0.0001	0.000100005	14.1023	chrIX_8147_T_C_37066	chrIX_8147_T_C_37066	chrIX_33247_T_C_37234	chrIX_8147_T_C	chrIX_8147_T_C	chrIX_33247_T_C	-0.198924	0.0428382	chrIX	2.16474e-14	chrIX_8147_T_C chrIX_8147_T_C chrIX_33008_C_T chrIX_33143_A_T	393	TRUE	chrIX	8147	31312	23166	*	FALSE	0.00787224	chrIX_8147_T_C	YPD;37;1	0.0001	0.000100005	16.202	chrIX_29272_A_T_25757	chrIX_179_C_T_25645	chrIX_33261_T_C_25790	chrIX_29272_A_T	chrIX_179_C_T
Galactose;;1	YNL085W	MKT1	chrXIV	466886	469837	2952	+	0.714348	BYa	decrease	0.0899548	0.38563	chrXIV_467219_A_G				0.0001	0.000100005	17.0048	chrXIV_472575_AG_A_41548	chrXIV_466588_T_G_41538	chrXIV_476037_T_C_41556	chrXIV_472575_AG_A	chrXIV_466588_T_G	chrXIV_476037_T_C	0.162342	0.0269125	chrXIV	7.46584e-16	chrXIV_466588_T_G chrXIV_467028_A_G chrXIV_476709_GT_G chrXIV_476709_GT_G	375	TRUE	chrXIV	468488	473648	5161	*	FALSE	0.148837	chrXIV_472575_AG_A	Galactose;;1	0.0001	0.000100005	74.1852	chrXIV_466588_T_G_41198	chrXIV_466588_T_G_41198	chrXIV_470330_C_T_41205	chrXIV_466588_T_G	chrXIV_466588_T_G
Mannose;;1	YOR128C	ADE2	chrXV	564334	566533	2200	-	0.714286	M22	increase	0.0906641	0.178571	chrXV_565820_A_G				0.0006	0.000185746	10.3851	chrXV_559459_T_C_46185	chrXV_558913_G_C_46183	chrXV_569825_C_T_46246	chrXV_559459_T_C	chrXV_558913_G_C	chrXV_569825_C_T	0.181054	0.0239664	chrXV	3.25237e-13	chrXV_550984_T_C chrXV_552775_C_G chrXV_569058_T_A chrXV_572419_T_C	375	TRUE	chrXV	553950	567085	13136	*	FALSE	0.137435	chrXV_559459_T_C	Mannose;;1	0.0001	0.000100005	396.143	chrXV_565236_A_G_80089	chrXV_565236_A_G_80089	chrXV_566820_A_T_80103	chrXV_565236_A_G	chrXV_565236_A_G
Caffeine;15mM;2	YOR043W	WHI2	chrXV	410265	412667	2403	+	0.710906	CLIB219x	decrease	0.0913804	0.51992	chrXV_410684_C_T				0.0001	0.000100005	50.529	chrXV_412111_T_C_66523	chrXV_408830_C_T_66510	chrXV_412504_A_G,*_66526	chrXV_412111_T_C	chrXV_408830_C_T	chrXV_412504_A_G,*	-0.46781	0.254378	chrXV	8.03739e-58	chrXV_410166_G_A chrXV_410166_G_A chrXV_412675_ATTT_A,AT,ATT chrXV_412675_ATTT_A,AT,ATT	3043	TRUE	chrXV	410166	412951	2786	*	FALSE	0.227506	chrXV_412111_T_C	Caffeine;15mM;2	0.0001	0.000100005	113.204	chrXV_410684_C_T_78784	chrXV_409138_G_T_78776	chrXV_412177_C_T_78793	chrXV_410684_C_T	chrXV_409138_G_T
Cadmium_Chloride;75uM;2	YIR020C		chrIX	393965	394736	772	-	0.709309	YPS1009x	decrease	0.0920974	0.189439	chrIX_394553_G_A				0.0001	0.000100005	17.1048	chrIX_389094_G_T_37535	chrIX_383434_C_CATAT,CATATATATATATATAT,CAT_37394	chrIX_396463_G_A,*_37665	chrIX_389094_G_T	chrIX_383434_C_CATAT,CATATATATATATATAT,CAT	chrIX_396463_G_A,*	-0.219356	0.0893399	chrIX	3.04076e-20	chrIX_385964_T_G chrIX_386751_A_C chrIX_396045_T_G chrIX_396836_G_A	3008	TRUE	chrIX	386988	395693	8706	*	FALSE	0.0800763	chrIX_389094_G_T	Cadmium_Chloride;75uM;2	0.0001	0.000100005	88.9368	chrIX_394553_G_A_43698	chrIX_393780_AT_A_43690	chrIX_394916_A_G_43709	chrIX_394553_G_A	chrIX_393780_AT_A
Maltose;;1	YNL139C	THO2	chrXIV	360924	365874	4951	-	0.707497	YJM145x	decrease	0.0928157	0.391763	chrXIV_364011_C_A,T				0.0001	0.000100005	18.6187	chrXIV_364011_C_A,T_42752	chrXIV_353786_A_T_42659	chrXIV_365482_G_A_42757	chrXIV_364011_C_A,T	chrXIV_353786_A_T	chrXIV_365482_G_A	-0.203947	0.0304954	chrXIV	7.25799e-20	chrXIV_356174_T_A chrXIV_358013_T_C chrXIV_366695_T_C chrXIV_367094_G_A	377	TRUE	chrXIV	357524	367094	9571	*	FALSE	0.247086	chrXIV_364011_C_A,T	Maltose;;1	0.0001	0.000100005	31.4144	chrXIV_368706_A_G_54884	chrXIV_366695_T_C_54875	chrXIV_371516_T_C_54903	chrXIV_368706_A_G	chrXIV_366695_T_C
Mannose;;1	YNL141W	AAH1	chrXIV	359274	360777	1504	+	0.707165	CLIB413a	increase	0.09353	0.529595	chrXIV_359506_T_G				0.0001	0.000100005	11.9845	chrXIV_342494_C_A_62931	chrXIV_326625_C_G_62852	chrXIV_355873_G_A_63054	chrXIV_342494_C_A	chrXIV_326625_C_G	chrXIV_355873_G_A	-0.195715	0.0349891	chrXIV	1.94515e-13	chrXIV_326497_C_CTT chrXIV_331067_G_A chrXIV_354061_C_T chrXIV_356935_T_A,C	393	TRUE	chrXIV	320457	359147	38691	*	FALSE	0.0996835	chrXIV_342494_C_A	Mannose;;1	0.0001	0.000100005	25.0529	chrXIV_359506_T_G_42722	chrXIV_354740_A_G_42663	chrXIV_367094_G_A_42767	chrXIV_359506_T_G	chrXIV_354740_A_G
Magnesium_Chloride;;1	YOR128C	ADE2	chrXV	564334	566533	2200	-	0.706597	M22	increase	0.0942413	0.176042	chrXV_565820_A_G				0.0002	0.000114293	10.4066	chrXV_560189_T_A_46190	chrXV_558913_G_C_46183	chrXV_584081_T_C_46312	chrXV_560189_T_A	chrXV_558913_G_C	chrXV_584081_T_C	0.155758	0.0234854	chrXV	1.05566e-10	chrXV_550984_T_C chrXV_552775_C_G chrXV_574378_G_A chrXV_580333_C_G	375	TRUE	chrXV	549036	569825	20790	*	FALSE	0.0611836	chrXV_560189_T_A	Magnesium_Chloride;;1	0.0001	0.000100005	363.492	chrXV_565236_A_G_80089	chrXV_565236_A_G_80089	chrXV_566820_A_T_80103	chrXV_565236_A_G	chrXV_565236_A_G
Caffeine;15mM;2	YOR153W	PDR5	chrXV	619064	624551	5488	+	0.704225	BYa	decrease	0.094956	0.131455	chrXV_622303_C_T				0.0001	0.000100005	27.5223	chrXV_621951_T_C_46573	chrXV_620881_A_G_46572	chrXV_626602_C_T_46607	chrXV_621951_T_C	chrXV_620881_A_G	chrXV_626602_C_T	0.183452	0.0507281	chrXV	2.32777e-11	chrXV_610864_A_G chrXV_616818_A_T chrXV_627894_T_C chrXV_628552_C_T	375	TRUE	chrXV	611430	629011	17582	*	FALSE	0.13	chrXV_621951_T_C	Caffeine;15mM;2	0.0001	0.000100005	83.318	chrXV_635897_C_T_46362	chrXV_635682_A_G_46361	chrXV_638136_T_C_46372	chrXV_635897_C_T	chrXV_635682_A_G
Formamide;2%;2	YOR141C	ARP8	chrXV	589611	592821	3211	-	0.70396	YPS1009x	decrease	0.0956665	0.126733	chrXV_590700_G_A				0.0001	0.000100005	8.39417	chrXV_603935_G_A_76920	chrXV_586076_A_T_76837	chrXV_632145_T_C_77103	chrXV_603935_G_A	chrXV_586076_A_T	chrXV_632145_T_C	-0.166266	0.0226444	chrXV	1.68651e-11	chrXV_587816_C_T chrXV_589865_A_AAT,ATT chrXV_610864_A_G chrXV_619251_G_C	2999	TRUE	chrXV	590341	610704	20364	*	FALSE	0.0446809	chrXV_603935_G_A	Formamide;2%;2	0.0001	0.000100005	17.0265	chrXV_589132_A_G_68659	chrXV_588933_T_A,C_68656	chrXV_594307_A_G_68699	chrXV_589132_A_G	chrXV_588933_T_A,C
Sucrose;;1	YOR128C	ADE2	chrXV	564334	566533	2200	-	0.700867	M22	increase	0.0963829	0.174494	chrXV_565820_A_G				0.0001	0.000100005	29.6155	chrXV_559714_T_A_46188	chrXV_558913_G_C_46183	chrXV_562567_C_T_46203	chrXV_559714_T_A	chrXV_558913_G_C	chrXV_562567_C_T	0.282657	0.0643408	chrXV	1.76421e-32	chrXV_557623_T_C chrXV_558381_T_A chrXV_564575_C_T chrXV_568141_T_C	375	TRUE	chrXV	557623	568252	10630	*	FALSE	0.158644	chrXV_559714_T_A	Sucrose;;1	0.0001	0.000100005	389.789	chrXV_565236_A_G_80089	chrXV_565236_A_G_80089	chrXV_566820_A_T_80103	chrXV_565236_A_G	chrXV_565236_A_G
YNB;ph8;1	YIL169C	CSS1	chrIX	20915	28521	7607	-	0.700122	YJM978x	decrease	0.097097	0.0282658	chrIX_29543_C_G				0.0001	0.000100005	9.20524	chrIX_33412_A_G_37240	chrIX_8147_T_C_37066	chrIX_36456_C_A_37288	chrIX_33412_A_G	chrIX_8147_T_C	chrIX_36456_C_A	-0.207445	0.0439221	chrIX	1.15642e-10	chrIX_29619_T_G,A chrIX_30598_G_A chrIX_43748_C_T chrIX_47922_C_T	393	TRUE	chrIX	8405	44180	35776	*	FALSE	0.0407751	chrIX_33412_A_G	YNB;ph8;1	0.0001	0.000100005	39.1204	chrIX_29074_T_G_25753	chrIX_29044_T_C_25752	chrIX_29781_G_A_25762	chrIX_29074_T_G	chrIX_29044_T_C
Copper_Sulfate;;1	YHR052W	CIC1	chrVIII	210499	212243	1745	+	0.7	273614xa	increase	0.0978064	0.1	chrVIII_210500_A_G				0.0001	0.000100005	45.0057	chrVIII_209243_C_T_14992	chrVIII_195601_G_A_14902	chrVIII_209377_T_C_14994	chrVIII_209243_C_T	chrVIII_195601_G_A	chrVIII_209377_T_C	-0.344317	0.0921307	chrVIII	1.76151e-46	chrVIII_203086_T_C chrVIII_204740_G_A chrVIII_209267_A_G chrVIII_209267_A_G	3003	TRUE	chrVIII	200102	212556	12455	*	FALSE	0.190683	chrVIII_209267_A_G	Copper_Sulfate;;1	0.0001	0.000100005	418.969	chrVIII_210188_T_C_34059	chrVIII_210188_T_C_34059	chrVIII_212556_C_T_34077	chrVIII_210188_T_C	chrVIII_210188_T_C
Tunicamycin;3uM;3	YLR344W	RPL26A	chrXII	818536	820325	1790	+	0.699876	CLIB219x	increase	0.0985113	0.121095	chrXII_819681_A_G				0.0001	0.000100005	24.5714	chrXII_819681_A_G_51912	chrXII_808679_A_G_51501	chrXII_826674_C_T_51984	chrXII_819681_A_G	chrXII_808679_A_G	chrXII_826674_C_T	0.209594	0.0458884	chrXII	5.44932e-27	chrXII_810263_C_T chrXII_811565_T_C chrXII_822853_A_G chrXII_824233_C_T	3043	TRUE	chrXII	808835	824008	15174	*	FALSE	0.0627854	chrXII_819681_A_G	Tunicamycin;3uM;3	0.0001	0.000100005	56.7494	chrXII_815867_CTT_C,*_61174	chrXII_813629_C_T_61018	chrXII_819854_T_C_61271	chrXII_815867_CTT_C,*	chrXII_813629_C_T
EtOH;;1	YLL008W	DRS1	chrXII	131571	134143	2573	+	0.698046	Y10x	decrease	0.0992177	0.333925	chrXII_133303_C_T				0.0001	0.000100005	8.31695	chrXII_133123_C_T_44850	chrXII_126383_G_C_44833	chrXII_161448_G_A_44934	chrXII_133123_C_T	chrXII_126383_G_C	chrXII_161448_G_A	-0.168147	0.029813	chrXII	4.36574e-10	chrXII_129169_GAA_GAAA,G,GA chrXII_130212_G_A chrXII_146140_G_A chrXII_146506_G_A	3000	TRUE	chrXII	111423	157854	46432	*	FALSE	0.0803419	chrXII_133123_C_T	EtOH;;1	0.0001	0.000100005	10.2556	chrXII_132130_C_A_59552	chrXII_131340_A_G_59543	chrXII_146347_C_T_59622	chrXII_132130_C_A	chrXII_131340_A_G
Fluconazole;100uM;2	YGL013C	PDR1	chrVII	467745	472575	4831	-	0.697584	YPS1009x	decrease	0.0999208	0.0927514	chrVII_472348_G_C				0.0003	0.00017145	5.93812	chrVII_460250_G_A_31264	chrVII_450992_G_C_31223	chrVII_482968_A_C_31376	chrVII_460250_G_A	chrVII_450992_G_C	chrVII_482968_A_C	-0.105937	0.0209314	chrVII	1.73892e-06	chrVII_452136_C_A chrVII_454910_T_C chrVII_475280_C_T chrVII_479288_G_A	2999	TRUE	chrVII	452994	477047	24054	*	FALSE	0.0748219	chrVII_460250_G_A	Fluconazole;100uM;2	0.0001	0.000100005	21.1968	chrVII_472348_G_C_27479	chrVII_470363_T_C_27471	chrVII_474708_T_C_27488	chrVII_472348_G_C	chrVII_470363_T_C
Glycerol;;1	YDR261C	EXG2	chrIV	977375	980334	2960	-	0.696429	273614xa	decrease	0.100623	0.0714286	chrIV_980072_G_A				0.0006	0.000260051	7.02744	chrIV_955620_A_C_7354	chrIV_952329_T_C_7350	chrIV_955986_GAAAAA_G,GA,GAAA,GAAAA,GAA,GAAAAAA_7356	chrIV_955620_A_C	chrIV_952329_T_C	chrIV_955986_GAAAAA_G,GA,GAAA,GAAAA,GAA,GAAAAAA	0.144739	0.0215714	chrIV	3.45349e-08	chrIV_941063_T_C chrIV_947317_G_A chrIV_961189_A_G chrIV_979570_TCC_T	3003	TRUE	chrIV	934903	980341	45439	*	FALSE	0.220698	chrIV_955620_A_C	Glycerol;;1	0.0001	0.000100005	12.9859	chrIV_1003514_T_C_16703	chrIV_970880_C_T_16459	chrIV_1012518_G_A_16782	chrIV_1003514_T_C	chrIV_970880_C_T
EtOH_Glucose;;1	YIL169C	CSS1	chrIX	20915	28521	7607	-	0.69335	YJM978x	decrease	0.101331	0.116046	chrIX_29543_C_G				0.0001	0.000100005	59.3984	chrIX_29272_A_T_25757	chrIX_29074_T_G_25753	chrIX_29781_G_A_25762	chrIX_29272_A_T	chrIX_29074_T_G	chrIX_29781_G_A	-0.417246	0.0828207	chrIX	3.39505e-60	chrIX_179_C_T chrIX_29044_T_C chrIX_30497_C_T chrIX_31904_G_A	381	TRUE	chrIX	179	30858	30680	*	FALSE	0.0841704	chrIX_29272_A_T	EtOH_Glucose;;1	0.0001	0.000100005	62.0399	chrIX_8147_T_C_37066	chrIX_8147_T_C_37066	chrIX_31082_A_T_37212	chrIX_8147_T_C	chrIX_8147_T_C
Cadmium_Chloride;75uM;2	YLR131C	ACE2	chrXII	404286	407051	2766	-	0.6924	YPS1009x	decrease	0.102037	0.117612	chrXII_405942_C_G				0.4155	0.113276	14.5883	chrXII_403898_C_T_57147	chrXII_402905_G_A_57139	chrXII_404732_C_T_57155	chrXII_403898_C_T	chrXII_402905_G_A	chrXII_404732_C_T	-0.291694	0.0228054	chrXII	3.69441e-17	chrXII_402827_A_C chrXII_403319_G_A chrXII_404694_G_A chrXII_405138_C_A	2999	TRUE	chrXII	402827	404732	1906	*	FALSE	0.336696	chrXII_403898_C_T	Cadmium_Chloride;75uM;2	0.0001	0.000100005	47.0311	chrXII_405942_C_G_49934	chrXII_403898_C_T_49919	chrXII_406565_A_G_49939	chrXII_405942_C_G	chrXII_403898_C_T
Mannose;;1	YIL169C	CSS1	chrIX	20915	28521	7607	-	0.692358	YJM978x	decrease	0.102739	0.110627	chrIX_29543_C_G				0.0001	0.000100005	53.1945	chrIX_29272_A_T_25757	chrIX_29044_T_C_25752	chrIX_29781_G_A_25762	chrIX_29272_A_T	chrIX_29044_T_C	chrIX_29781_G_A	-0.393726	0.074519	chrIX	2.99784e-53	chrIX_179_C_T chrIX_29044_T_C chrIX_31271_A_G chrIX_32857_T_C	381	TRUE	chrIX	179	30858	30680	*	FALSE	0.0795706	chrIX_29272_A_T	Mannose;;1	0.0001	0.000100005	53.2383	chrIX_8147_T_C_37066	chrIX_8147_T_C_37066	chrIX_31082_A_T_37212	chrIX_8147_T_C	chrIX_8147_T_C
Cobalt_Chloride;2mM;2	YDR244W	PEX5	chrIV	950423	952599	2177	+	0.688488	273614xa	decrease	0.103449	0.641084	chrIV_952329_T_C				0.0001	0.000100005	28.4752	chrIV_952329_T_C_7350	chrIV_938591_T_C_7331	chrIV_953287_C_G_7351	chrIV_952329_T_C	chrIV_938591_T_C	chrIV_953287_C_G	0.211716	0.0269555	chrIV	1.64745e-31	chrIV_947317_G_A chrIV_949523_G_A chrIV_953287_C_G chrIV_953287_C_G	3003	TRUE	chrIV	949523	953287	3765	*	FALSE	0.589701	chrIV_952329_T_C	Cobalt_Chloride;2mM;2	0.0001	0.000100005	20.1715	chrIV_955349_C_A_16378	chrIV_953693_T_C_16363	chrIV_998676_T_C_16665	chrIV_955349_C_A	chrIV_953693_T_C
Fructose;;1	YBR141W-A		chrII	527167	527788	622	+	0.686364	Y10x	decrease	0.104162	0.252983	chrII_527601_G_A				0.0001	0.000100005	17.3126	chrII_526608_T_C,A_4694	chrII_510026_T_C_4642	chrII_533330_T_A_4762	chrII_526608_T_C,A	chrII_510026_T_C	chrII_533330_T_A	-0.216749	0.0460667	chrII	8.08276e-19	chrII_515157_G_A chrII_520435_G_A chrII_537038_C_G chrII_539056_C_T	3000	TRUE	chrII	516986	533504	16519	*	FALSE	0.0762016	chrII_526608_T_C,A	Fructose;;1	0.0001	0.000100005	20.0289	chrII_527516_C_T_6685	chrII_526731_C_G_6678	chrII_527601_G_A_6688	chrII_527516_C_T	chrII_526731_C_G
YPD;;1	YNL084C	END3	chrXIV	469838	471238	1401	-	0.68545	BYa	decrease	0.104873	0.276441	chrXIV_470301_C_T				0.0001	0.000100005	24.6782	chrXIV_467219_A_G_41540	chrXIV_466588_T_G_41538	chrXIV_476709_GT_G_41557	chrXIV_467219_A_G	chrXIV_466588_T_G	chrXIV_476709_GT_G	0.261026	0.0639862	chrXIV	1.035e-24	chrXIV_466588_T_G chrXIV_466588_T_G chrXIV_470301_C_T chrXIV_472575_AG_A	375	TRUE	chrXIV	463554	472584	9031	*	FALSE	0.47026	chrXIV_467219_A_G	YPD;;1	0.0001	0.000100005	57.3537	chrXIV_470301_C_T_41204	chrXIV_466588_T_G_41198	chrXIV_471767_A_G_41208	chrXIV_470301_C_T	chrXIV_466588_T_G
Manganese_Sulfate;;1	YJR005W	APL1	chrX	445392	448250	2859	+	0.682785	YJM981x	decrease	0.105588	0.497099	chrX_446453_A_G				0.0001	0.000100005	98.7062	chrX_442101_T_C_20391	chrX_423483_A_G_20291	chrX_452858_G_A_20452	chrX_442101_T_C	chrX_423483_A_G	chrX_452858_G_A	-0.401399	0.175504	chrX	7.0762e-97	chrX_428258_C_T chrX_434034_C_T chrX_442431_A_G chrX_442545_G_A	3003	TRUE	chrX	438674	443738	5065	*	FALSE	0.205293	chrX_442101_T_C	Manganese_Sulfate;;1	0.0001	0.000100005	89.7723	chrX_446453_A_G_43142	chrX_434839_C_T_43083	chrX_446453_A_G_43142	chrX_446453_A_G	chrX_434839_C_T
Fructose;;1	YIL169C	CSS1	chrIX	20915	28521	7607	-	0.682637	YJM978x	decrease	0.106298	0.134014	chrIX_29543_C_G				0.0001	0.000100005	73.4506	chrIX_29272_A_T_25757	chrIX_29272_A_T_25757	chrIX_29781_G_A_25762	chrIX_29272_A_T	chrIX_29272_A_T	chrIX_29781_G_A	-0.472953	0.126634	chrIX	2.68238e-73	chrIX_179_C_T chrIX_29044_T_C chrIX_30497_C_T chrIX_31271_A_G	381	TRUE	chrIX	179	29781	29603	*	FALSE	0.101062	chrIX_29272_A_T	Fructose;;1	0.0001	0.000100005	83.1858	chrIX_8147_T_C_37066	chrIX_8147_T_C_37066	chrIX_31082_A_T_37212	chrIX_8147_T_C	chrIX_8147_T_C
Zeocin;25ug/mL;3	YNL084C	END3	chrXIV	469838	471238	1401	-	0.681021	BYa	decrease	0.10701	0.334051	chrXIV_470844_A_G				0.0001	0.000100005	17.3424	chrXIV_468488_A_G_41541	chrXIV_467028_A_G_41539	chrXIV_476709_GT_G_41557	chrXIV_468488_A_G	chrXIV_467028_A_G	chrXIV_476709_GT_G	0.19902	0.0251341	chrXIV	6.08862e-19	chrXIV_463554_A_T chrXIV_466588_T_G chrXIV_473648_T_C chrXIV_476037_T_C	375	TRUE	chrXIV	463554	476709	13156	*	FALSE	0.270458	chrXIV_468488_A_G	Zeocin;25ug/mL;3	0.0001	0.000100005	29.5696	chrXIV_470844_A_G_41207	chrXIV_466103_G_A_41197	chrXIV_473648_T_C_41215	chrXIV_470844_A_G	chrXIV_466103_G_A
EtOH_Glucose;;1	YIL169C	CSS1	chrIX	20915	28521	7607	-	0.677508	YPS163a	decrease	0.107728	0.0143747	chrIX_25351_T_A,*				0.0001	0.000100005	25.8809	chrIX_29700_A_T,C_32492	chrIX_70_C_CCACCACACCCACACCCACACACCCACACACACACACCCA_32378	chrIX_33503_A_T_32558	chrIX_29700_A_T,C	chrIX_70_C_CCACCACACCCACACCCACACACCCACACACACACACCCA	chrIX_33503_A_T	-0.220921	0.0378166	chrIX	1.70963e-27	chrIX_264_T_C chrIX_8164_G_A,* chrIX_34647_A_G chrIX_35773_T_G	B	TRUE	chrIX	264	32693	32430	*	FALSE	0.0165034	chrIX_29725_T_C	EtOH_Glucose;;1	0.0001	0.000100005	21.9796	chrIX_8158_T_C_37474	chrIX_8158_T_C_37474	chrIX_32569_A_G_37634	chrIX_8158_T_C	chrIX_8158_T_C
Maltose;;1	YNL085W	MKT1	chrXIV	466886	469837	2952	+	0.673607	BYa	decrease	0.108454	0.366091	chrXIV_467219_A_G				0.0001	0.000100005	16.0212	chrXIV_469224_A_G_41202	chrXIV_466103_G_A_41197	chrXIV_476709_GT_G_41216	chrXIV_469224_A_G	chrXIV_466103_G_A	chrXIV_476709_GT_G	0.183037	0.0280531	chrXIV	6.65877e-18	chrXIV_456295_T_C chrXIV_462478_C_T chrXIV_473368_TC_T chrXIV_476709_GT_G	A	TRUE	chrXIV	448975	476709	27735	*	FALSE	0.162939	chrXIV_469224_A_G	Maltose;;1	0.0001	0.000100005	16.2941	chrXIV_467219_A_G_41540	chrXIV_463554_A_T_41534	chrXIV_476709_GT_G_41557	chrXIV_467219_A_G	chrXIV_463554_A_T
6-azauracil;50ug/mL;3	YIL169C	CSS1	chrIX	20915	28521	7607	-	0.673125	YJM978x	decrease	0.109177	0.0530452	chrIX_29543_C_G				0.0001	0.000100005	10.2478	chrIX_8147_T_C_37066	chrIX_8147_T_C_37066	chrIX_35479_C_G_37272	chrIX_8147_T_C	chrIX_8147_T_C	chrIX_35479_C_G	-0.195179	0.034981	chrIX	5.25489e-12	chrIX_8147_T_C chrIX_8147_T_C chrIX_33143_A_T chrIX_33143_A_T	393	TRUE	chrIX	8147	31909	23763	*	FALSE	0.00776197	chrIX_8147_T_C	6-azauracil;50ug/mL;3	0.0001	0.000100005	43.0261	chrIX_29781_G_A_25762	chrIX_179_C_T_25645	chrIX_31271_A_G_25781	chrIX_29781_G_A	chrIX_179_C_T
Tunicamycin;3uM;3	YPL091W	GLR1	chrXVI	375335	377121	1787	+	0.672345	M22	increase	0.109899	0.126224	chrXVI_375693_G_A				0.0001	0.000100005	37.7216	chrXVI_374729_A_C_86339	chrXVI_373699_GC_G_86334	chrXVI_379429_GT_GTTGTTGTTGTTAT,G,*_86373	chrXVI_374729_A_C	chrXVI_373699_GC_G	chrXVI_379429_GT_GTTGTTGTTGTTAT,G,*	0.231926	0.0341833	chrXVI	1.94392e-42	chrXVI_373699_GC_G chrXVI_373699_GC_G chrXVI_379477_G_T chrXVI_380110_G_A	3028	TRUE	chrXVI	373699	378939	5241	*	FALSE	0.129412	chrXVI_374729_A_C	Tunicamycin;3uM;3	0.0001	0.000112507	22.1554	chrXVI_373847_A_G_48461	chrXVI_373847_A_G_48461	chrXVI_378223_C_T_48483	chrXVI_373847_A_G	chrXVI_373847_A_G
Congo_Red;75ug/mL;3	YNL085W	MKT1	chrXIV	466886	469837	2952	+	0.671898	BYa	decrease	0.110616	0.325159	chrXIV_466588_T_G				0.0001	0.000100005	42.596	chrXIV_476709_GT_G_41557	chrXIV_467028_A_G_41539	chrXIV_476709_GT_G_41557	chrXIV_476709_GT_G	chrXIV_467028_A_G	chrXIV_476709_GT_G	0.33087	0.0984902	chrXIV	5.06425e-42	chrXIV_470301_C_T chrXIV_473303_T_C chrXIV_476709_GT_G chrXIV_476709_GT_G	375	TRUE	chrXIV	466588	476709	10122	*	FALSE	0.746741	chrXIV_476709_GT_G	Congo_Red;75ug/mL;3	0.0001	0.000100005	93.4557	chrXIV_466588_T_G_41198	chrXIV_466588_T_G_41198	chrXIV_470440_T_C_41206	chrXIV_466588_T_G	chrXIV_466588_T_G
YNB;ph3;1	YMR070W	MOT3	chrXIII	408860	410693	1834	+	0.670511	YJM981x	increase	0.111334	0.275082	chrXIII_411358_C_T				0.0028	0.00145197	5.02722	chrXIII_410283_C_A_27746	chrXIII_405245_G_A_27732	chrXIII_412878_C_G_27750	chrXIII_410283_C_A	chrXIII_405245_G_A	chrXIII_412878_C_G	0.138649	0.0207921	chrXIII	1.61195e-06	chrXIII_389982_T_C chrXIII_396464_G_A chrXIII_416124_C_T chrXIII_424654_G_C	3003	TRUE	chrXIII	389982	421112	31131	*	FALSE	0.101568	chrXIII_410283_C_A	YNB;ph3;1	0.0001	0.000100005	9.50222	chrXIII_411113_C_T_58184	chrXIII_400173_C_T_58127	chrXIII_442835_A_G_58375	chrXIII_411113_C_T	chrXIII_400173_C_T
Zeocin;25ug/mL;3	YDR475C	JIP4	chrIV	1406659	1410272	3614	-	0.670078	CLIB413a	increase	0.112048	0.25101	chrIV_1408799_A_G				0.0001	0.000100005	19.7152	chrIV_1405821_G_A_12113	chrIV_1395046_C_G_12060	chrIV_1407605_T_C_12134	chrIV_1405821_G_A	chrIV_1395046_C_G	chrIV_1407605_T_C	-0.257169	0.0625338	chrIV	5.53989e-21	chrIV_1399551_A_AT chrIV_1399937_T_C chrIV_1408568_T_C chrIV_1411263_A_G	377	TRUE	chrIV	1400042	1408802	8761	*	FALSE	0.0990396	chrIV_1405821_G_A	Zeocin;25ug/mL;3	0.0001	0.000100005	60.2642	chrIV_1408799_A_G_18988	chrIV_1400933_G_A_18924	chrIV_1409803_C_T_18992	chrIV_1408799_A_G	chrIV_1400933_G_A
YNB;ph8;1	YLR216C	CPR6	chrXII	571977	573210	1234	-	0.669689	I14a	decrease	0.112759	0.555586	chrXII_572186_A_G				0.0001	0.000100005	21.3181	chrXII_572186_A_G_58181	chrXII_567173_T_C_58158	chrXII_574557_G_A_58189	chrXII_572186_A_G	chrXII_567173_T_C	chrXII_574557_G_A	0.285777	0.0710998	chrXII	1.99628e-23	chrXII_564107_A_T chrXII_567173_T_C chrXII_574584_C_G chrXII_577178_A_G	2999	TRUE	chrXII	562667	579317	16651	*	FALSE	0.183643	chrXII_572186_A_G	YNB;ph8;1	0.0001	0.000100005	70.3007	chrXII_572294_G_A_47260	chrXII_570032_G_A_47246	chrXII_574945_C_T_47272	chrXII_572294_G_A	chrXII_570032_G_A
Diamide;1.5mM;3	YOR128C	ADE2	chrXV	564334	566533	2200	-	0.66879	M22	increase	0.113468	0.165605	chrXV_565820_A_G				0.0001	0.000100005	18.4916	chrXV_558913_G_C_46183	chrXV_558913_G_C_46183	chrXV_582812_G_C_46309	chrXV_558913_G_C	chrXV_558913_G_C	chrXV_582812_G_C	0.221701	0.0505936	chrXV	7.76033e-20	chrXV_552421_A_T chrXV_553386_C_T chrXV_568141_T_C chrXV_571256_A_C	375	TRUE	chrXV	550623	572098	21476	*	FALSE	0.147264	chrXV_558913_G_C	Diamide;1.5mM;3	0.0001	0.000100005	329.391	chrXV_565236_A_G_80089	chrXV_565236_A_G_80089	chrXV_566820_A_T_80103	chrXV_565236_A_G	chrXV_565236_A_G
Galactose;;1	YOR124C	UBP2	chrXV	554697	558835	4139	-	0.668345	YJM145x	decrease	0.114175	0.248201	chrXV_558497_G_A				0.0001	0.000100005	10.38	chrXV_569825_C_T_47086	chrXV_558381_T_A_47016	chrXV_571108_C_T_47089	chrXV_569825_C_T	chrXV_558381_T_A	chrXV_571108_C_T	-0.169532	0.0287988	chrXV	6.7787e-12	chrXV_553085_C_T chrXV_555261_A_G chrXV_577985_G_T chrXV_580595_T_C	377	TRUE	chrXV	545340	574821	29482	*	FALSE	0.0814132	chrXV_569825_C_T	Galactose;;1	0.0001	0.000100005	48.8102	chrXV_558497_G_A_61133	chrXV_557623_T_C_61131	chrXV_558497_G_A_61133	chrXV_558497_G_A	chrXV_557623_T_C
EtOH;;1	YOR128C	ADE2	chrXV	564334	566533	2200	-	0.667606	M22	increase	0.114879	0.166197	chrXV_565820_A_G				0.0001	0.000100005	16.1485	chrXV_562162_C_T_46199	chrXV_558913_G_C_46183	chrXV_564575_C_T_46218	chrXV_562162_C_T	chrXV_558913_G_C	chrXV_564575_C_T	0.194395	0.0339054	chrXV	2.67037e-17	chrXV_553950_C_T chrXV_556870_T_G chrXV_571079_T_C chrXV_573228_T_C	375	TRUE	chrXV	553950	581173	27224	*	FALSE	0.0619796	chrXV_562162_C_T	EtOH;;1	0.0001	0.000100005	273.55	chrXV_565236_A_G_80089	chrXV_565236_A_G_80089	chrXV_566820_A_T_80103	chrXV_565236_A_G	chrXV_565236_A_G
Maltose;;1	YGR295C	COS6	chrVII	1081126	1083795	2670	-	0.666696	I14a	increase	0.115581	0.0278622	chrVII_1083004_G_C,*				0.0001	0.000100005	149.782	chrVII_1066075_A_T,AT_29425	chrVII_1066075_A_T,AT_29425	chrVII_1084271_G_T_29507	chrVII_1066075_A_T,AT	chrVII_1066075_A_T,AT	chrVII_1084271_G_T	-0.693005	0.495517	chrVII	7.20039e-151	chrVII_1065495_A_G chrVII_1066075_A_T,AT chrVII_1066075_A_T,AT chrVII_1066075_A_T,AT	3000	TRUE	chrVII	1066075	1084074	18000	*	FALSE	0.0120128	chrVII_1066075_A_T,AT	Maltose;;1	0.0001	0.000100005	281.595	chrVII_1067411_G_A_35733	chrVII_1067411_G_A_35733	chrVII_1084074_G_A_35916	chrVII_1067411_G_A	chrVII_1067411_G_A
Glycerol;;1	YOR128C	ADE2	chrXV	564334	566533	2200	-	0.664858	M22	increase	0.116285	0.163879	chrXV_565820_A_G				0.0001	0.000100005	17.0567	chrXV_559714_T_A_46188	chrXV_558913_G_C_46183	chrXV_563917_G_A_46210	chrXV_559714_T_A	chrXV_558913_G_C	chrXV_563917_G_A	0.228946	0.0436565	chrXV	8.89018e-19	chrXV_553150_T_C chrXV_555451_A_G chrXV_567262_G_A chrXV_571108_C_T	375	TRUE	chrXV	550984	571300	20317	*	FALSE	0.124671	chrXV_559714_T_A	Glycerol;;1	0.0001	0.000100005	208.864	chrXV_565236_A_G_80089	chrXV_565236_A_G_80089	chrXV_566820_A_T_80103	chrXV_565236_A_G	chrXV_565236_A_G
Fluconazole;100uM;2	YDL132W	CDC53	chrIV	224022	227071	3050	+	0.663827	Y10x	increase	0.116987	0.191338	chrIV_225140_A_G				0.0001	0.000100005	21.6475	chrIV_221162_G_A_9855	chrIV_214965_G_A_9806	chrIV_226314_C_T_9876	chrIV_221162_G_A	chrIV_214965_G_A	chrIV_226314_C_T	0.24126	0.0557296	chrIV	4.52855e-22	chrIV_215182_A_G chrIV_217435_A_T chrIV_230620_T_A chrIV_233636_G_A	3000	TRUE	chrIV	217351	232043	14693	*	FALSE	0.104403	chrIV_221162_G_A	Fluconazole;100uM;2	0.0001	0.000100005	23.2936	chrIV_225741_C_T_13955	chrIV_210594_G_A_13856	chrIV_237417_G_A_14058	chrIV_225741_C_T	chrIV_210594_G_A
Copper_Sulfate;;1	YOL121C	RPS19A	chrXV	91722	93121	1400	-	0.660302	CBS2888a	decrease	0.117696	0.148502	chrXV_92494_TA_TAAA,TAA,T				0.0001	0.000100005	14.1189	chrXV_92494_TA_TAAA,TAA,T_64854	chrXV_57448_C_T_64509	chrXV_93152_A_G_64870	chrXV_92494_TA_TAAA,TAA,T	chrXV_57448_C_T	chrXV_93152_A_G	0.224293	0.0427795	chrXV	5.90921e-16	chrXV_73040_A_G chrXV_80009_A_G chrXV_107084_C_T chrXV_110270_A_T	3043	TRUE	chrXV	67610	93152	25543	*	FALSE	0.0544323	chrXV_92494_TA_TAAA,TAA,T	Copper_Sulfate;;1	0.0001	0.000100005	29.7	chrXV_91042_A_G_66468	chrXV_66814_C_G_66322	chrXV_91491_G_A_66471	chrXV_91042_A_G	chrXV_66814_C_G
Lactate;;1	YJL010C	NOP9	chrX	416166	419707	3542	-	0.658147	YJM981x	increase	0.118408	0.123003	chrX_419079_A_G				0.0001	0.000100005	65.2246	chrX_431531_T_C_20336	chrX_424353_A_G_20294	chrX_443738_A_C_20400	chrX_431531_T_C	chrX_424353_A_G	chrX_443738_A_C	0.483752	0.233038	chrX	6.13935e-66	chrX_421100_G_T chrX_424405_C_G chrX_438674_GA_G chrX_443738_A_C	3003	TRUE	chrX	416974	450387	33414	*	FALSE	0.113948	chrX_431531_T_C	Lactate;;1	0.0001	0.000100005	78.8086	chrX_418304_T_C_43012	chrX_417194_A_AG_43005	chrX_422219_T_C_43026	chrX_418304_T_C	chrX_417194_A_AG
Caffeine;15mM;2	YOR153W	PDR5	chrXV	619064	624551	5488	+	0.656934	273614xa	increase	0.119119	0.656934	chrXV_622657_A_G				0.0001	0.000100005	12.7698	chrXV_619880_C_G_32517	chrXV_611617_T_C_32494	chrXV_622657_A_G_32520	chrXV_619880_C_G	chrXV_611617_T_C	chrXV_622657_A_G	-0.167713	0.0235758	chrXV	6.53544e-15	chrXV_608649_A_AT,ATT chrXV_609631_C_G chrXV_626072_T_C chrXV_627044_A_G	3003	TRUE	chrXV	608367	626072	17706	*	FALSE	0.0856945	chrXV_619880_C_G	Caffeine;15mM;2	0.0001	0.000100005	43.9851	chrXV_624459_G_A_72906	chrXV_621669_A_G_72891	chrXV_625649_C_T_72928	chrXV_624459_G_A	chrXV_621669_A_G
Glycerol;;1	YBR140C	IRA1	chrII	517270	526825	9556	-	0.65625	273614xa	increase	0.119828	0.15625	chrII_516659_T_C				0.0003	0.000166685	10.2259	chrII_516924_C_T_2481	chrII_499384_A_G_2440	chrII_531664_C_A,T_2606	chrII_516924_C_T	chrII_499384_A_G	chrII_531664_C_A,T	-0.18317	0.0251292	chrII	5.04922e-12	chrII_513032_G_A chrII_515762_C_T chrII_537796_A_G,* chrII_538836_G_A	3003	TRUE	chrII	515762	538507	22746	*	FALSE	0.0440294	chrII_516924_C_T	Glycerol;;1	0.0001	0.000100005	14.9507	chrII_507755_A_G_5558	chrII_503351_A_C_5528	chrII_526014_T_C_5785	chrII_507755_A_G	chrII_503351_A_C
Xylose;;1	YOR127W	RGA1	chrXV	560923	564333	3411	+	0.654867	YJM145x	decrease	0.120536	0.274336	chrXV_562162_C_T				0.0001	0.000100005	7.70388	chrXV_546512_CT_C,CTT_46962	chrXV_516181_C_T_46749	chrXV_548302_T_G_46970	chrXV_546512_CT_C,CTT	chrXV_516181_C_T	chrXV_548302_T_G	-0.184171	0.0365337	chrXV	1.9733e-09	chrXV_527497_G_C chrXV_531421_A_G chrXV_560610_A_G chrXV_564278_T_C	377	TRUE	chrXV	533055	564451	31397	*	FALSE	0.107784	chrXV_546512_CT_C,CTT	Xylose;;1	0.0001	0.000100005	17.6045	chrXV_561454_T_C_61144	chrXV_559459_T_C_61134	chrXV_563008_G_A_61153	chrXV_561454_T_C	chrXV_559459_T_C
YPD;;1	YIL169C	CSS1	chrIX	20915	28521	7607	-	0.654617	YPS163a	decrease	0.121241	0.0138481	chrIX_25278_C_A				0.0001	0.000100005	35.4487	chrIX_29700_A_T,C_32492	chrIX_70_C_CCACCACACCCACACCCACACACCCACACACACACACCCA_32378	chrIX_33054_G_GAA_32538	chrIX_29700_A_T,C	chrIX_70_C_CCACCACACCCACACCCACACACCCACACACACACACCCA	chrIX_33054_G_GAA	-0.301403	0.0534832	chrIX	3.31305e-38	chrIX_264_T_C chrIX_264_T_C chrIX_33510_A_G chrIX_34351_A_G	B	TRUE	chrIX	264	31312	31049	*	FALSE	0.0192685	chrIX_29725_T_C	YPD;;1	0.0001	0.000100005	21.2845	chrIX_8158_T_C_37474	chrIX_8158_T_C_37474	chrIX_33247_T_C_37651	chrIX_8158_T_C	chrIX_8158_T_C
Sorbitol;1.5M;2	YDL241W		chrIV	19973	21737	1765	+	0.654325	CLIB413a	decrease	0.121942	0.0838794	chrIV_21083_G_C,T				0.0001	0.00014287	7.92565	chrIV_33853_G_A_6631	chrIV_351_AC_A,GC,*_6319	chrIV_34267_T_C_6635	chrIV_33853_G_A	chrIV_351_AC_A,GC,*	chrIV_34267_T_C	0.176974	0.0341464	chrIV	7.4265e-11	chrIV_21113_G_T,A chrIV_22656_T_C chrIV_40439_T_C chrIV_42278_C_T	377	TRUE	chrIV	5828	46353	40526	*	FALSE	0.107962	chrIV_33853_G_A	Sorbitol;1.5M;2	0.0001	0.000100005	13.8765	chrIV_21056_AT_A_9895	chrIV_20160_C_G_9879	chrIV_31709_T_C_9999	chrIV_21056_AT_A	chrIV_20160_C_G
Sorbitol;1.5M;2	YIL166C		chrIX	28522	33141	4620	-	0.652174	YPS163a	increase	0.122646	0.0648893	chrIX_30915_A_T				0.0004	0.000142873	6.08008	chrIX_33510_A_G_32559	chrIX_70_C_CCACCACACCCACACCCACACACCCACACACACACACCCA_32378	chrIX_114886_G_A_32990	chrIX_33510_A_G	chrIX_70_C_CCACCACACCCACACCCACACACCCACACACACACACCCA	chrIX_114886_G_A	0.13432	0.0205722	chrIX	2.86403e-08	chrIX_25813_G_A,T,* chrIX_29750_C_G chrIX_41905_A_G chrIX_47766_G_A	B	TRUE	chrIX	8301	37723	29423	*	FALSE	0.0176491	chrIX_33510_A_G	Sorbitol;1.5M;2	0.0001	0.000100005	14.0423	chrIX_30915_A_T_37623	chrIX_8158_T_C_37474	chrIX_33224_T_C_37649	chrIX_30915_A_T	chrIX_8158_T_C
Tunicamycin;3uM;3	YKL114C	APN1	chrXI	223318	224590	1273	-	0.650718	M22	decrease	0.12335	0.572568	chrXI_223560_C_T				0.0001	0.000100005	18.6219	chrXI_218728_C_T_29695	chrXI_216646_T_C_29672	chrXI_224066_T_A_29753	chrXI_218728_C_T	chrXI_216646_T_C	chrXI_224066_T_A	-0.19363	0.0340886	chrXI	1.68523e-20	chrXI_211081_C_T chrXI_212173_A_G chrXI_223086_G_A chrXI_224066_T_A	375	TRUE	chrXI	210381	222033	11653	*	FALSE	0.0621118	chrXI_218728_C_T	Tunicamycin;3uM;3	0.0001	0.000100005	143.361	chrXI_223560_C_T_52169	chrXI_220773_G_GGGAGGTGCT,*_52149	chrXI_223560_C_T_52169	chrXI_223560_C_T	chrXI_220773_G_GGGAGGTGCT,*
SDS;0.075%;3	YOR363C	PIP2	chrXV	1019484	1023290	3807	-	0.649852	CLIB413a	decrease	0.124052	0.25816	chrXV_1020567_A_G				0.0027	0.00183813	5.60068	chrXV_1018597_C_T_48659	chrXV_989204_G_A_48623	chrXV_1065425_G_C_48745	chrXV_1018597_C_T	chrXV_989204_G_A	chrXV_1065425_G_C	0.156615	0.0228452	chrXV	7.70448e-08	chrXV_1009383_C_T chrXV_1010938_T_C chrXV_1029127_C_T chrXV_1037511_CAAA_C	377	TRUE	chrXV	1009383	1037513	28131	*	FALSE	0.211896	chrXV_1018597_C_T	SDS;0.075%;3	0.0001	0.000100005	6.87161	chrXV_1045539_TGTATTTTGAGCACAGGTAGATATAAGCTCTGGACAGTTTTGCTACCCCTTGAAAGAATTCAACA_T_72439	chrXV_1022713_C_G_72324	chrXV_1068590_T_C_72714	chrXV_1045539_TGTATTTTGAGCACAGGTAGATATAAGCTCTGGACAGTTTTGCTACCCCTTGAAAGAATTCAACA_T	chrXV_1022713_C_G
Lactate;;1	YNL139C	THO2	chrXIV	360924	365874	4951	-	0.649599	YJM145x	decrease	0.124751	0.649599	chrXIV_365482_G_A				0.0001	0.000100005	28.695	chrXIV_364987_G_A_42756	chrXIV_359539_G_A_42723	chrXIV_366211_C_T_42759	chrXIV_364987_G_A	chrXIV_359539_G_A	chrXIV_366211_C_T	-0.377746	0.0710071	chrXIV	3.41761e-30	chrXIV_362793_C_T chrXIV_364011_C_A,T chrXIV_364987_G_A chrXIV_366054_C_T	377	TRUE	chrXIV	364611	366054	1444	*	FALSE	0.358529	chrXIV_364987_G_A	Lactate;;1	0.0001	0.000100005	75.7183	chrXIV_366695_T_C_54875	chrXIV_366054_C_T_54870	chrXIV_367901_A_G_54880	chrXIV_366695_T_C	chrXIV_366054_C_T
Zeocin;25ug/mL;3	YDR508C	GNP1	chrIV	1466119	1468443	2325	-	0.648597	YPS163a	decrease	0.125448	0.0780469	chrIV_1467713_A_G				0.0001	0.000100005	8.39747	chrIV_1469501_G_A_19429	chrIV_1437568_T_C_19156	chrIV_1475249_G_A_19470	chrIV_1469501_G_A	chrIV_1437568_T_C	chrIV_1475249_G_A	-0.163545	0.0205092	chrIV	2.22008e-11	chrIV_1450764_A_G chrIV_1456713_A_G chrIV_1474394_T_A chrIV_1476572_A_G	376	TRUE	chrIV	1466196	1474416	8221	*	FALSE	0.106969	chrIV_1469501_G_A	Zeocin;25ug/mL;3	0.0001	0.000100005	17.7674	chrIV_1467544_C_T_16711	chrIV_1465952_G_A_16698	chrIV_1470478_TAA_TA,T,TAAA_16743	chrIV_1467544_C_T	chrIV_1465952_G_A
6-azauracil;50ug/mL;3	YNL143C		chrXIV	354969	357318	2350	-	0.64799	YJM145x	decrease	0.126143	0.0609013	chrXIV_361014_A_G				0.0002	0.000125009	6.17964	chrXIV_360946_T_C_42730	chrXIV_335000_T_A_42505	chrXIV_383048_T_C_42792	chrXIV_360946_T_C	chrXIV_335000_T_A	chrXIV_383048_T_C	-0.143055	0.0244347	chrXIV	1.12172e-07	chrXIV_347478_A_G chrXIV_349160_T_TCA chrXIV_368326_G_A,T chrXIV_368957_C_T	377	TRUE	chrXIV	352937	369651	16715	*	FALSE	0.0765697	chrXIV_360946_T_C	6-azauracil;50ug/mL;3	0.0001	0.000100005	13.087	chrXIV_356343_G_T_54794	chrXIV_330165_G_A_54644	chrXIV_364987_G_A_54861	chrXIV_356343_G_T	chrXIV_330165_G_A
SDS;0.075%;3	YDR036C	EHD3	chrIV	523069	525075	2007	-	0.647092	YJM978x	decrease	0.126836	0.138905	chrIV_523051_A_G				0.0008	0.00020005	7.29086	chrIV_547801_A_G_13487	chrIV_355376_TAA_T_11879	chrIV_550727_A_T_13498	chrIV_547801_A_G	chrIV_355376_TAA_T	chrIV_550727_A_T	-0.147326	0.022022	chrIV	2.51392e-08	chrIV_522889_A_C chrIV_538081_A_G chrIV_551155_A_G chrIV_555379_C_T	393	TRUE	chrIV	522793	549752	26960	*	FALSE	0.0153534	chrIV_547801_A_G	SDS;0.075%;3	0.0001	0.000100005	8.20884	chrIV_522274_G_A_9062	chrIV_486689_C_T_8954	chrIV_542283_G_A_9114	chrIV_522274_G_A	chrIV_486689_C_T
Fluconazole;100uM;2	YOR153W	PDR5	chrXV	619064	624551	5488	+	0.646477	YJM454a	increase	0.127527	0.150579	chrXV_619579_C_T				0.0001	0.000100005	12.601	chrXV_619579_C_T_68883	chrXV_617274_T_A_68836	chrXV_629132_G_A_68976	chrXV_619579_C_T	chrXV_617274_T_A	chrXV_629132_G_A	-0.205084	0.0394319	chrXV	2.49396e-14	chrXV_607617_T_C chrXV_611434_A_G chrXV_628228_A_G chrXV_633360_T_C	3008	TRUE	chrXV	613660	626533	12874	*	FALSE	0.11251	chrXV_619579_C_T	Fluconazole;100uM;2	0.0001	0.000100005	35.215	chrXV_617676_A_G_51440	chrXV_609550_G_A_51391	chrXV_624930_A_G_51524	chrXV_617676_A_G	chrXV_609550_G_A
Methotrexate;0.4mM;2	YNL087W	TCB2	chrXIV	462200	466139	3940	+	0.646077	BYa	increase	0.128216	0.161519	chrXIV_463554_A_T				0.0001	0.000100005	25.0154	chrXIV_462478_C_T_41188	chrXIV_453089_C_A_41175	chrXIV_463992_C_G_41192	chrXIV_462478_C_T	chrXIV_453089_C_A	chrXIV_463992_C_G	-0.309647	0.0846088	chrXIV	1.06007e-27	chrXIV_447324_C_T chrXIV_453089_C_A chrXIV_466103_G_A chrXIV_466588_T_G	A	TRUE	chrXIV	445766	465187	19422	*	FALSE	0.231593	chrXIV_462478_C_T	Methotrexate;0.4mM;2	0.0001	0.000100005	16.18	chrXIV_467219_A_G_41540	chrXIV_466588_T_G_41538	chrXIV_472613_C_T_41551	chrXIV_467219_A_G	chrXIV_466588_T_G
Fructose;;1	YDR246W-A		chrIV	955040	955672	633	+	0.64539	273614xa	decrease	0.128902	0.64539	chrIV_955620_A_C				0.0001	0.000100005	31.1429	chrIV_955620_A_C_7354	chrIV_954920_C_CA_7352	chrIV_955620_A_C_7354	chrIV_955620_A_C	chrIV_954920_C_CA	chrIV_955620_A_C	0.344182	0.0493672	chrIV	4.19461e-34	chrIV_955222_C_T chrIV_955222_C_T chrIV_955831_C_T chrIV_955831_C_T	3003	TRUE	chrIV	955620	955986	367	*	FALSE	0.603648	chrIV_955620_A_C	Fructose;;1	0.0001	0.000100005	25.5957	chrIV_953693_T_C_16363	chrIV_953693_T_C_16363	chrIV_1002060_C_T,A_16692	chrIV_953693_T_C	chrIV_953693_T_C
Raffinose;;1	YPL091W	GLR1	chrXVI	375335	377121	1787	+	0.642857	YJM981x	increase	0.129591	0.642857	chrXVI_376683_A_G				0.0157	0.00426976	7.0487	chrXVI_373674_G_A_36476	chrXVI_373674_G_A_36476	chrXVI_381864_A_G,*_36487	chrXVI_373674_G_A	chrXVI_373674_G_A	chrXVI_381864_A_G,*	0.236035	0.0328201	chrXVI	5.37647e-12	chrXVI_373674_G_A chrXVI_373674_G_A chrXVI_376683_A_G chrXVI_376683_A_G	3003	TRUE	chrXVI	373674	374422	749	*	FALSE	0.183409	chrXVI_373674_G_A	Raffinose;;1	0.0001	0.000100005	28.5633	chrXVI_382165_G_C_74608	chrXVI_376027_G_A_74494	chrXVI_412640_A_G_74769	chrXVI_382165_G_C	chrXVI_376027_G_A
Cadmium_Chloride;75uM;2	YNL074C	MLF3	chrXIV	486622	488254	1633	-	0.640182	YPS163a	increase	0.130285	0.29979	chrXIV_487214_T_C				0.0001	0.000100005	18.4192	chrXIV_486552_TAA_T,TAAA_55494	chrXIV_474779_T_C_55449	chrXIV_486552_TAA_T,TAAA_55494	chrXIV_486552_TAA_T,TAAA	chrXIV_474779_T_C	chrXIV_486552_TAA_T,TAAA	0.195647	0.0348958	chrXIV	8.35784e-21	chrXIV_480999_AC_ACC,CC,ACCCCCC,ACCCCCCC,A chrXIV_483057_CT_C chrXIV_487892_G_T chrXIV_488653_A_G	B	TRUE	chrXIV	477349	489067	11719	*	FALSE	0.291866	chrXIV_486552_TAA_T,TAAA	Cadmium_Chloride;75uM;2	0.0001	0.000100005	19.2857	chrXIV_487214_T_C_65954	chrXIV_487177_T_G_65953	chrXIV_489067_C_T_65966	chrXIV_487214_T_C	chrXIV_487177_T_G
Fructose;;1	YEL041W	YEF1	chrV	75635	77741	2107	+	0.640063	YJM981x	decrease	0.130974	0.497827	chrV_77002_G_A				0.0001	0.000100005	13.299	chrV_79059_T_C_19965	chrV_75507_G_A_19938	chrV_81401_A_G_19995	chrV_79059_T_C	chrV_75507_G_A	chrV_81401_A_G	-0.22781	0.0339846	chrV	7.68994e-16	chrV_72942_C_T chrV_74271_T_G chrV_84912_TA_TAA,T chrV_88547_C_T	3004	TRUE	chrV	74994	83200	8207	*	FALSE	0.0938567	chrV_79059_T_C	Fructose;;1	0.0001	0.000100005	37.4066	chrV_76912_A_G_8567	chrV_74994_T_C_8561	chrV_78959_C_T_8576	chrV_76912_A_G	chrV_74994_T_C
EGTA;5mM;3	YBR192W	RIM2	chrII	607437	608932	1496	+	0.638279	CBS2888a	increase	0.131665	0.263389	chrII_608066_T_C				0.0001	0.000100005	65.1701	chrII_606340_C_A_6311	chrII_597781_C_A,T_6242	chrII_606771_C_T_6318	chrII_606340_C_A	chrII_597781_C_A,T	chrII_606771_C_T	-0.362658	0.153057	chrII	3.90561e-66	chrII_598176_G_A chrII_598314_T_C chrII_606759_C_T chrII_609989_C_G	3043	TRUE	chrII	594148	608290	14143	*	FALSE	0.255947	chrII_606340_C_A	EGTA;5mM;3	0.0001	0.000100005	82.1794	chrII_608066_T_C_6127	chrII_606608_A_G_6108	chrII_608176_T_C_6128	chrII_608066_T_C	chrII_606608_A_G
Magnesium_Chloride;;1	YBR141W-A		chrII	527167	527788	622	+	0.637538	Y10x	decrease	0.132354	0.190892	chrII_527601_G_A				0.0001	0.000100005	17.3398	chrII_527516_C_T_6685	chrII_520657_T_C_6584	chrII_528018_C_T_6691	chrII_527516_C_T	chrII_520657_T_C	chrII_528018_C_T	-0.272596	0.0622859	chrII	3.04777e-19	chrII_513050_G_A chrII_517869_G_A chrII_532298_A_T chrII_533441_T_G	3001	TRUE	chrII	525429	530998	5570	*	FALSE	0.135838	chrII_527516_C_T	Magnesium_Chloride;;1	0.0001	0.000100005	23.0672	chrII_526608_T_C,A_4694	chrII_498500_T_C_4555	chrII_528793_T_C_4709	chrII_526608_T_C,A	chrII_498500_T_C
Galactose;;1	YBR021W	FUR4	chrII	281025	283540	2516	+	0.63682	CBS2888a	decrease	0.133041	0.0758607	chrII_281733_C_T				0.0001	0.000100005	18.4785	chrII_273030_G_A_3776	chrII_269210_C_G,T_3668	chrII_285436_C_A_3937	chrII_273030_G_A	chrII_269210_C_G,T	chrII_285436_C_A	0.170153	0.0249473	chrII	2.88892e-20	chrII_268541_A_G chrII_270725_AT_A,ATT chrII_284447_C_T chrII_287505_C_T	3043	TRUE	chrII	268270	284447	16178	*	FALSE	0.0424981	chrII_273030_G_A	Galactose;;1	0.0001	0.000100005	22.2544	chrII_281733_C_T_3835	chrII_220722_C_T_3326	chrII_282486_C_T_3860	chrII_281733_C_T	chrII_220722_C_T
Glycerol;;1	YHL029C	OCA5	chrVIII	45809	48364	2556	-	0.634654	Y10x	increase	0.13373	0.209338	chrVIII_48666_G_C				0.0001	0.000100005	7.65106	chrVIII_48226_AACAACAACAACAACAACAGC_A,*_29922	chrVIII_36667_G_A_29876	chrVIII_68352_T_C_30047	chrVIII_48226_AACAACAACAACAACAACAGC_A,*	chrVIII_36667_G_A	chrVIII_68352_T_C	0.155031	0.027962	chrVIII	1.49628e-09	chrVIII_29141_T_C chrVIII_37219_A_T chrVIII_50759_C_T chrVIII_52688_G_T	3000	TRUE	chrVIII	23638	58905	35268	*	FALSE	0.0774021	chrVIII_48241_AACAGC_A,*	Glycerol;;1	0.0073	0.00320973	6.26434	chrVIII_49173_GAGT_G,GAGTAGT_39866	chrVIII_48939_T_C_39862	chrVIII_56421_T_TTTTCTCTTGCAATAAGTTCTTTCCCTTTTCCCCTCTTGGTCTTGTTCTCTTTA,TTCTCTCTTGCTATAAGTTCTTTCCCTTTTCCCCTCTTGGTCTTGTTCTCTTTA,TTTTCTCTTGCAATAAGTTCTTTCCCTTTTTCCCTCTTGGTCTTGTTCTCTTTA,TTTGCTCTTGCAATAAGTTCTTTCCCTTTTCCCCTCTTGGTCTTGTTCTCTTTA,TTTTCTCTTGGAATAAGTTCTTTCCCTTTTCCCCTCTTGGTCTTGTTCTCTTTATCTCTCTTCCTTTC,TTCTCTCTTGCTATAAGTTCTTTCCCTTTTCCCCTCTTGGTCTTGTCCTCTTTA_39992	chrVIII_49173_GAGT_G,GAGTAGT	chrVIII_48939_T_C
6-azauracil;50ug/mL;3	YKL040C	NFU1	chrXI	360937	362224	1288	-	0.633503	CLIB219x	decrease	0.134419	0.371574	chrXI_361774_G_T				0.0001	0.000100005	19.2741	chrXI_361774_G_T_53275	chrXI_361052_G_A_53267	chrXI_366840_C_T_53333	chrXI_361774_G_T	chrXI_361052_G_A	chrXI_366840_C_T	0.144933	0.021006	chrXI	7.52533e-21	chrXI_354596_C_T chrXI_357004_A_G chrXI_366804_T_C chrXI_368278_T_C	3028	TRUE	chrXI	350428	366486	16059	*	FALSE	0.0837337	chrXI_361774_G_T	6-azauracil;50ug/mL;3	0.0001	0.000100005	13.5876	chrXI_370565_A_C,G_44451	chrXI_354609_T_C_44360	chrXI_377826_G_A_44497	chrXI_370565_A_C,G	chrXI_354609_T_C
EGTA;5mM;3	YOL154W	ZPS1	chrXV	33132	38076	4945	+	0.631816	YPS1009x	decrease	0.135109	0.174839	chrXV_35745_T_A				0.0024	0.000672002	9.56333	chrXV_35742_G_C_64942	chrXV_35251_A_T_64934	chrXV_35915_T_C_64948	chrXV_35742_G_C	chrXV_35251_A_T	chrXV_35915_T_C	-0.180066	0.0220081	chrXV	5.0478e-11	chrXV_34039_A_G chrXV_34711_T_C chrXV_38473_A_T chrXV_40227_G_A	3008	TRUE	chrXV	2452	36091	33640	*	FALSE	0.0405446	chrXV_35742_G_C	EGTA;5mM;3	0.0001	0.000100005	19.1004	chrXV_35730_G_A_73002	chrXV_295_CT_C_72723	chrXV_40057_C_G_73057	chrXV_35730_G_A	chrXV_295_CT_C
Sucrose;;1	YOR125C	CAT5	chrXV	558836	559845	1010	-	0.630165	YJM145x	decrease	0.135799	0.630165	chrXV_559768_T_G				0.0001	0.000100005	13.1463	chrXV_562162_C_T_47036	chrXV_559459_T_C_47020	chrXV_569825_C_T_47086	chrXV_562162_C_T	chrXV_559459_T_C	chrXV_569825_C_T	-0.281191	0.193342	chrXV	3.6755e-14	chrXV_557758_A_G chrXV_558913_G_C chrXV_567367_C_T chrXV_571079_T_C	377	TRUE	chrXV	552775	569529	16755	*	FALSE	0.189003	chrXV_562162_C_T	Sucrose;;1	0.0001	0.000100005	91.0447	chrXV_559459_T_C_61134	chrXV_559459_T_C_61134	chrXV_559591_A_G_61137	chrXV_559459_T_C	chrXV_559459_T_C
Zeocin;25ug/mL;3	YJL165C	HAL5	chrX	106806	109712	2907	-	0.630084	BYa	increase	0.136486	0.0882353	chrX_107689_G_T				0.0001	0.000100005	20.3105	chrX_107689_G_T_25620	chrX_107470_T_C_25616	chrX_108954_G_T_25633	chrX_107689_G_T	chrX_107470_T_C	chrX_108954_G_T	-0.210043	0.0423363	chrX	1.34122e-22	chrX_101045_G_GA,GAA chrX_103478_T_C chrX_116017_A_G chrX_117184_G_C	375	TRUE	chrX	101069	119135	18067	*	FALSE	0.138013	chrX_107689_G_T	Zeocin;25ug/mL;3	0.0001	0.000100005	10.0037	chrX_109213_T_C_25286	chrX_105170_C_T_25248	chrX_121624_C_T_25412	chrX_109213_T_C	chrX_105170_C_T
Lactate;;1	YLL007C	LMO1	chrXII	134144	136321	2178	-	0.627586	YJM454a	increase	0.137175	0.193103	chrXII_134269_T_A				0.0012	0.00025725	7.84665	chrXII_125190_C_T_47945	chrXII_114223_A_G_47877	chrXII_168058_CCAAA_TCAAA,*_48206	chrXII_125190_C_T	chrXII_114223_A_G	chrXII_168058_CCAAA_TCAAA,*	-0.154304	0.0239939	chrXII	5.64182e-10	chrXII_111638_C_G chrXII_114118_C_T chrXII_128659_T_C chrXII_131705_A_G	3008	TRUE	chrXII	113653	138768	25116	*	FALSE	0.0979228	chrXII_125190_C_T	Lactate;;1	0.0001	0.000100005	17.4072	chrXII_133477_C_T_35299	chrXII_129022_A_G_35272	chrXII_157785_T_C_35402	chrXII_133477_C_T	chrXII_129022_A_G
YPD;;1	YIL169C	CSS1	chrIX	20915	28521	7607	-	0.624596	YJM978x	decrease	0.13787	0.200604	chrIX_29543_C_G				0.0001	0.000100005	74.8048	chrIX_29272_A_T_25757	chrIX_29074_T_G_25753	chrIX_29781_G_A_25762	chrIX_29272_A_T	chrIX_29074_T_G	chrIX_29781_G_A	-0.498497	0.155131	chrIX	6.81848e-77	chrIX_29044_T_C chrIX_29044_T_C chrIX_30066_G_C chrIX_30497_C_T	381	TRUE	chrIX	179	30858	30680	*	FALSE	0.113099	chrIX_29272_A_T	YPD;;1	0.0001	0.000100005	51.0823	chrIX_8147_T_C_37066	chrIX_8147_T_C_37066	chrIX_31082_A_T_37212	chrIX_8147_T_C	chrIX_8147_T_C
Raffinose;;1	YIL165C		chrIX	33142	34081	940	-	0.624473	YPS163a	decrease	0.138561	0.0421941	chrIX_32483_C_T,CT				0.0001	0.000100005	22.3751	chrIX_29700_A_T,C_32492	chrIX_70_C_CCACCACACCCACACCCACACACCCACACACACACACCCA_32378	chrIX_36687_A_G_32602	chrIX_29700_A_T,C	chrIX_70_C_CCACCACACCCACACCCACACACCCACACACACACACCCA	chrIX_36687_A_G	-0.186251	0.0281624	chrIX	2.66743e-27	chrIX_264_T_C chrIX_264_T_C chrIX_34647_A_G chrIX_35674_T_C	B	TRUE	chrIX	264	32673	32410	*	FALSE	0.0189062	chrIX_29700_A_T,C	Raffinose;;1	0.0001	0.000100005	29.3511	chrIX_38929_T_C_37722	chrIX_33455_T_C_37662	chrIX_38929_T_C_37722	chrIX_38929_T_C	chrIX_33455_T_C
Neomycin;5mg/mL;2	YLR257W		chrXII	655632	660252	4621	+	0.619832	BYa	decrease	0.139261	0.0507973	chrXII_647017_C_T				0.0001	0.000100005	21.7376	chrXII_657631_C_T_33819	chrXII_648649_C_T_33781	chrXII_660371_C_T_33842	chrXII_657631_C_T	chrXII_648649_C_T	chrXII_660371_C_T	0.201383	0.0522072	chrXII	1.49991e-22	chrXII_643160_A_G chrXII_644135_C_T chrXII_662311_T_C chrXII_666935_A_G,T	A	TRUE	chrXII	643838	666390	22553	*	FALSE	0.0346957	chrXII_657631_C_T	Neomycin;5mg/mL;2	0.0001	0.000100005	29.6911	chrXII_647017_C_T_34130	chrXII_637193_C_A_34099	chrXII_662353_G_A_34211	chrXII_647017_C_T	chrXII_637193_C_A
Cadmium_Chloride;75uM;2	YOL121C	RPS19A	chrXV	91722	93121	1400	-	0.618616	YJM981x	increase	0.139961	0.299835	chrXV_91219_C_T				0.0001	0.000100005	41.8188	chrXV_91219_C_T_30371	chrXV_89912_C_T_30370	chrXV_93135_C_T_30380	chrXV_91219_C_T	chrXV_89912_C_T	chrXV_93135_C_T	0.302911	0.0899151	chrXV	3.99389e-44	chrXV_89912_C_T chrXV_89912_C_T chrXV_92932_C_T chrXV_93175_C_T	3003	TRUE	chrXV	89912	93082	3171	*	FALSE	0.583333	chrXV_91219_C_T	Cadmium_Chloride;75uM;2	0.0001	0.000100005	32.1558	chrXV_94590_GA_G_66496	chrXV_92494_TA_TAAA,TAA,T_66476	chrXV_96035_C_T_66515	chrXV_94590_GA_G	chrXV_92494_TA_TAAA,TAA,T
Sucrose;;1	YIL169C	CSS1	chrIX	20915	28521	7607	-	0.615542	YJM978x	decrease	0.140666	0.208187	chrIX_29543_C_G				0.0001	0.000100005	47.3101	chrIX_8147_T_C_37066	chrIX_8147_T_C_37066	chrIX_31082_A_T_37212	chrIX_8147_T_C	chrIX_8147_T_C	chrIX_31082_A_T	-0.437965	0.202267	chrIX	1.88295e-52	chrIX_8147_T_C chrIX_8147_T_C chrIX_31312_A_G chrIX_31909_A_G	393	TRUE	chrIX	8147	28108	19962	*	FALSE	0.00847894	chrIX_8147_T_C	Sucrose;;1	0.0001	0.000100005	83.9366	chrIX_29272_A_T_25757	chrIX_29074_T_G_25753	chrIX_29781_G_A_25762	chrIX_29272_A_T	chrIX_29074_T_G
Galactose;;1	YOL157C	IMA2	chrXV	21918	24782	2865	-	0.615385	Y10x	decrease	0.141367	0.0384615	chrXV_2138_C_T				0.0001	0.000100005	30.1141	chrXV_33489_C_T_79021	chrXV_33152_G_T_79015	chrXV_46436_CGT_C_79713	chrXV_33489_C_T	chrXV_33152_G_T	chrXV_46436_CGT_C	-0.37202	0.145297	chrXV	5.07241e-32	chrXV_33152_G_T chrXV_33308_C_A chrXV_36395_T_G chrXV_44801_C_T	3001	TRUE	chrXV	2138	34557	32420	*	FALSE	0.124066	chrXV_33489_C_T	Galactose;;1	0.0001	0.000100005	46.8502	chrXV_293_T_A_60378	chrXV_293_T_A_60378	chrXV_37107_C_T,A_60613	chrXV_293_T_A	chrXV_293_T_A
Zeocin;25ug/mL;3	YLR212C	TUB4	chrXII	564695	566466	1772	-	0.60855	CLIB413a	increase	0.142083	0.205012	chrXII_566015_T_C				0.0001	0.000100005	13.7469	chrXII_571496_C_A_51610	chrXII_556591_GT_G_51537	chrXII_604997_G_A_51804	chrXII_571496_C_A	chrXII_556591_GT_G	chrXII_604997_G_A	-0.173667	0.0207171	chrXII	3.79972e-15	chrXII_557627_A_G chrXII_563476_TACACACACACAC_TACACAC,TACACACAC,TAC,T,TACAC chrXII_578162_CTTT_C chrXII_584165_G_A	393	TRUE	chrXII	550373	580655	30283	*	FALSE	0.0952381	chrXII_571496_C_A	Zeocin;25ug/mL;3	0.0005	0.000180029	8.15742	chrXII_566015_T_C_34179	chrXII_531598_C_T_34051	chrXII_581223_C_T_34277	chrXII_566015_T_C	chrXII_531598_C_T
Trehalose;;1	YER008C	SEC3	chrV	167346	171965	4620	-	0.604651	CLIB413a	decrease	0.142807	0.395349	chrV_171809_A_T				0.0024	0.000560581	5.43867	chrV_153379_T_A_13521	chrV_125211_A_T_13369	chrV_157279_T_C_13536	chrV_153379_T_A	chrV_125211_A_T	chrV_157279_T_C	0.143502	0.021699	chrV	6.48265e-07	chrV_130380_T_C chrV_131068_C_CGGG chrV_173763_T_A chrV_175679_CTCTTCTGAAGCTAAGTCT_C,*	377	TRUE	chrV	128285	173989	45705	*	FALSE	0.0246361	chrV_153379_T_A	Trehalose;;1	0.0044	0.0016366	3.95417	chrV_171768_T_A_21124	chrV_68643_A_G_20494	chrV_174650_C_T_21139	chrV_171768_T_A	chrV_68643_A_G
Galactose;;1	YLR081W	GAL2	chrXII	289731	292164	2434	+	0.60263	YPS1009x	decrease	0.143532	0.162518	chrXII_289582_T_C				0.0001	0.000100005	21.922	chrXII_289575_T_C_49048	chrXII_288209_C_T_49042	chrXII_289908_T_G_49052	chrXII_289575_T_C	chrXII_288209_C_T	chrXII_289908_T_G	-0.160652	0.0243758	chrXII	4.44046e-23	chrXII_284942_G_A chrXII_285565_A_G chrXII_291545_G_A chrXII_296997_G_A	3008	TRUE	chrXII	285392	292169	6778	*	FALSE	0.1455	chrXII_289575_T_C	Galactose;;1	0.0001	0.000100005	36.1353	chrXII_293727_AT_A_56238	chrXII_289582_T_C_56209	chrXII_296355_T_C_56255	chrXII_293727_AT_A	chrXII_289582_T_C
Trehalose;;1	YGR153W		chrVII	795792	796770	979	+	0.602538	M22	decrease	0.144253	0.35533	chrVII_796304_G_A				0.0001	0.000100005	20.3774	chrVII_796304_G_A_34957	chrVII_794884_C_T_34945	chrVII_798596_T_C_34980	chrVII_796304_G_A	chrVII_794884_C_T	chrVII_798596_T_C	-0.156532	0.0214531	chrVII	9.95285e-23	chrVII_793301_A_T chrVII_794707_C_T chrVII_797524_G_A chrVII_797776_A_G	3028	TRUE	chrVII	793045	798596	5552	*	FALSE	0.254453	chrVII_796304_G_A	Trehalose;;1	0.0001	0.000100005	20.6237	chrVII_795589_T_C_18580	chrVII_795501_A_G_18579	chrVII_798910_T_A_18604	chrVII_795589_T_C	chrVII_795501_A_G
Formamide;2%;2	YOL086C	ADH1	chrXV	159496	161085	1590	-	0.602131	BYa	decrease	0.144972	0.0787402	chrXV_160403_G_A				0.0001	0.000100005	10.4926	chrXV_158776_T_C_43940	chrXV_152922_C_T_43897	chrXV_166700_A_T_44031	chrXV_158776_T_C	chrXV_152922_C_T	chrXV_166700_A_T	0.172816	0.0371128	chrXV	2.22273e-11	chrXV_143906_A_T chrXV_146472_G_A chrXV_167344_T_A chrXV_172752_C_T	375	TRUE	chrXV	143072	163945	20874	*	FALSE	0.0479042	chrXV_158776_T_C	Formamide;2%;2	0.0001	0.000100005	38.4417	chrXV_160403_G_A_43616	chrXV_159369_G_A_43606	chrXV_162766_C_T_43637	chrXV_160403_G_A	chrXV_159369_G_A
Paraquat;0.75mM;3	YDR378C	LSM6	chrIV	1229132	1229887	756	-	0.6016	RMx	decrease	0.145688	0.6016	chrIV_1229224_C_T				0.0001	0.000100005	33.0789	chrIV_1221460_C_T_17861	chrIV_1220957_G_A_17860	chrIV_1221481_T_C_17862	chrIV_1221460_C_T	chrIV_1220957_G_A	chrIV_1221481_T_C	0.241032	0.0570735	chrIV	1.01843e-35	chrIV_1220405_C_G chrIV_1220697_G_A chrIV_1232017_C_T chrIV_1236152_C_G	376	TRUE	chrIV	1215936	1236280	20345	*	FALSE	0.345336	chrIV_1221460_C_T	Paraquat;0.75mM;3	0.0001	0.000100005	59.53	chrIV_1229224_C_T_10078	chrIV_1222379_G_A_10067	chrIV_1229224_C_T_10078	chrIV_1229224_C_T	chrIV_1222379_G_A
Tunicamycin;3uM;3	YBR255W	MTC4	chrII	724359	726578	2220	+	0.600375	YPS1009x	decrease	0.146403	0.341463	chrII_724222_A_G				0.0001	0.000100005	13.7601	chrII_733230_A_G_6218	chrII_724222_A_G_6149	chrII_734445_A_G_6228	chrII_733230_A_G	chrII_724222_A_G	chrII_734445_A_G	-0.174729	0.0598792	chrII	1.79215e-14	chrII_721173_A_C chrII_723346_A_G chrII_734775_G_A chrII_736085_G_T	3008	TRUE	chrII	724845	735096	10252	*	FALSE	0.0981912	chrII_733230_A_G	Tunicamycin;3uM;3	0.0001	0.000100005	63.3666	chrII_724222_A_G_6730	chrII_723773_C_T_6726	chrII_727581_G_A_6752	chrII_724222_A_G	chrII_723773_C_T
Galactose;;1	YIL120W	QDR1	chrIX	134144	136380	2237	+	0.599068	YJM454a	decrease	0.147118	0.584737	chrIX_134734_A_G				0.0001	0.000100005	21.0249	chrIX_139422_A_G_35890	chrIX_104312_C_T_35669	chrIX_139732_C_T_35892	chrIX_139422_A_G	chrIX_104312_C_T	chrIX_139732_C_T	0.160568	0.0231304	chrIX	4.49503e-23	chrIX_123180_C_T chrIX_130270_T_C chrIX_140960_A_T chrIX_142478_C_A	3008	TRUE	chrIX	118421	140853	22433	*	FALSE	0.119537	chrIX_139422_A_G	Galactose;;1	0.0001	0.000100005	34.7167	chrIX_134734_A_G_26314	chrIX_127218_G_A_26269	chrIX_141727_T_C_26353	chrIX_134734_A_G	chrIX_127218_G_A
Diamide;1.5mM;3	YNL137C	NAM9	chrXIV	368458	370210	1753	-	0.599016	YJM145x	decrease	0.147829	0.322263	chrXIV_368577_T_C				0.0001	0.000100005	12.4765	chrXIV_368577_T_C_42775	chrXIV_353690_C_A_42658	chrXIV_369651_T_C_42782	chrXIV_368577_T_C	chrXIV_353690_C_A	chrXIV_369651_T_C	-0.218518	0.0441954	chrXIV	3.67033e-15	chrXIV_359147_G_A chrXIV_362826_G_A chrXIV_369556_C_T chrXIV_369556_C_T	377	TRUE	chrXIV	367094	369651	2558	*	FALSE	0.211632	chrXIV_368577_T_C	Diamide;1.5mM;3	0.0001	0.000100005	33.9316	chrXIV_364317_A_T_54858	chrXIV_363393_T_A,G_54854	chrXIV_364987_G_A_54861	chrXIV_364317_A_T	chrXIV_363393_T_A,G
EtOH;;1	YPR066W	UBA3	chrXVI	681006	682165	1160	+	0.598251	YJM454a	decrease	0.148538	0.259634	chrXVI_681419_G_A				0.0001	0.000100005	15.773	chrXVI_679389_C_T_76423	chrXVI_676743_C_T_76404	chrXVI_682519_C_T_76434	chrXVI_679389_C_T	chrXVI_676743_C_T	chrXVI_682519_C_T	0.194642	0.0371486	chrXVI	8.61197e-17	chrXVI_672668_C_T chrXVI_675721_T_C,* chrXVI_685682_C_T chrXVI_687832_A_T	3008	TRUE	chrXVI	662670	688326	25657	*	FALSE	0.116105	chrXVI_679389_C_T	EtOH;;1	0.0001	0.000100005	16.545	chrXVI_681419_G_A_57195	chrXVI_664712_A_G_57125	chrXVI_691627_G_A_57281	chrXVI_681419_G_A	chrXVI_664712_A_G
EtOH_Glucose;;1	YHL041W		chrVIII	16755	18463	1709	+	0.59789	YJM981x	decrease	0.149245	0.2966	chrVIII_16495_G_C				0.0001	0.000100005	21.819	chrVIII_16403_G_A_13695	chrVIII_988_C_T_13559	chrVIII_17359_A_T_13704	chrVIII_16403_G_A	chrVIII_988_C_T	chrVIII_17359_A_T	-0.386703	0.0271306	chrVIII	9.60471e-24	chrVIII_14774_T_TAA chrVIII_14865_G_A chrVIII_16886_G_C,GTTGGTTAC chrVIII_17359_A_T	3003	TRUE	chrVIII	988	17359	16372	*	FALSE	0.12181	chrVIII_16403_G_A	EtOH_Glucose;;1	0.0056	0.00202492	11.0628	chrVIII_18914_A_G_33334	chrVIII_15569_A_T_33299	chrVIII_19760_T_A,G_33338	chrVIII_18914_A_G	chrVIII_15569_A_T
Caffeine;15mM;2	YJR067C	YAE1	chrX	566923	567542	620	-	0.597799	CLIB413a	decrease	0.149947	0.290683	chrX_566912_G_GTAT				0.0017	0.0477917	11.3307	chrX_566822_C_T_43135	chrX_555015_A_G_43101	chrX_568787_T_C_43149	chrX_566822_C_T	chrX_555015_A_G	chrX_568787_T_C	0.251318	0.0281247	chrX	4.16868e-16	chrX_560156_C_T chrX_562118_G_T chrX_569031_A_G chrX_569184_C_T	393	TRUE	chrX	562118	568137	6020	*	FALSE	0.156413	chrX_566822_C_T	Caffeine;15mM;2	0.0001	0.000100005	18.2617	chrX_566912_G_GTAT_27848	chrX_562118_G_T_27833	chrX_567427_G_A_27856	chrX_566912_G_GTAT	chrX_562118_G_T
Methotrexate;0.4mM;2	YIL033C	BCY1	chrIX	290254	291814	1561	-	0.593486	YPS1009x	increase	0.150658	0.156091	chrIX_291022_G_A				0.0005	0.000362619	8.1119	chrIX_288072_G_A_36883	chrIX_286862_C_T_36881	chrIX_302829_C_T_36978	chrIX_288072_G_A	chrIX_286862_C_T	chrIX_302829_C_T	0.159258	0.0222113	chrIX	4.61344e-10	chrIX_275050_AT_A chrIX_277141_A_G chrIX_302974_G_C chrIX_303276_C_T	3008	TRUE	chrIX	271273	303577	32305	*	FALSE	0.0881435	chrIX_288072_G_A	Methotrexate;0.4mM;2	0.0001	0.000100005	14.1556	chrIX_290887_G_C_42895	chrIX_289119_C_T_42890	chrIX_306550_A_G_43007	chrIX_290887_G_C	chrIX_289119_C_T
Methotrexate;0.4mM;2	YLL007C	LMO1	chrXII	134144	136321	2178	-	0.588222	Y10x	decrease	0.151379	0.351986	chrXII_136110_G_C				0.0001	0.000100005	8.3023	chrXII_145897_C_T_44883	chrXII_136110_G_C_44862	chrXII_147475_T_C_44892	chrXII_145897_C_T	chrXII_136110_G_C	chrXII_147475_T_C	-0.165001	0.0391122	chrXII	8.32883e-10	chrXII_131100_A_T chrXII_133123_C_T chrXII_163557_C_T chrXII_164761_A_G	3000	TRUE	chrXII	134496	162566	28071	*	FALSE	0.0707965	chrXII_145897_C_T	Methotrexate;0.4mM;2	0.0001	0.000100005	14.9247	chrXII_136107_G_A_59571	chrXII_134566_A_G_59566	chrXII_157854_T_C_59674	chrXII_136107_G_A	chrXII_134566_A_G
Lactate;;1	YLL007C	LMO1	chrXII	134144	136321	2178	-	0.585925	Y10x	decrease	0.152103	0.173018	chrXII_134582_C_T				0.0001	0.000100005	13.4933	chrXII_133123_C_T_44850	chrXII_129169_GAA_GAAA,G,GA_44835	chrXII_145930_C_T_44885	chrXII_133123_C_T	chrXII_129169_GAA_GAAA,G,GA	chrXII_145930_C_T	-0.216661	0.0468854	chrXII	6.64689e-15	chrXII_130181_C_T chrXII_130729_C_T chrXII_145897_C_T chrXII_148252_A_G	3000	TRUE	chrXII	129169	157854	28686	*	FALSE	0.124896	chrXII_133123_C_T	Lactate;;1	0.0001	0.000100005	13.8541	chrXII_135282_C_G_59569	chrXII_132130_C_A_59552	chrXII_136368_C_T_59575	chrXII_135282_C_G	chrXII_132130_C_A
Glycerol;;1	YOL152W	FRE7	chrXV	38077	43151	5075	+	0.585859	Y10x	decrease	0.152823	0.121212	chrXV_40569_CATTT_C				0.0002	0.000114293	11.0999	chrXV_41720_G_A_60661	chrXV_35414_C_T_60595	chrXV_42278_T_C_60668	chrXV_41720_G_A	chrXV_35414_C_T	chrXV_42278_T_C	-0.204412	0.0241559	chrXV	1.56397e-13	chrXV_37107_C_T,A chrXV_38675_T_C chrXV_42247_GGA_CGA,G chrXV_47064_T_C	3000	TRUE	chrXV	15215	46753	31539	*	FALSE	0.125	chrXV_41720_G_A	Glycerol;;1	0.0052	0.00737968	5.39695	chrXV_34515_T_C_79037	chrXV_331_C_G_78779	chrXV_46436_CGT_C_79713	chrXV_34515_T_C	chrXV_331_C_G
EtOH_Glucose;;1	YOR011W	AUS1	chrXV	348314	354756	6443	+	0.583641	YPS1009x	increase	0.153545	0.0422164	chrXV_354333_AT_A				0.0001	0.000116674	6.87014	chrXV_354274_C_T_67119	chrXV_346194_A_G_67020	chrXV_378285_T_C_67290	chrXV_354274_C_T	chrXV_346194_A_G	chrXV_378285_T_C	0.141121	0.0213494	chrXV	9.23462e-09	chrXV_337465_G_A chrXV_340745_G_T chrXV_372237_A_G chrXV_377548_G_A	3008	TRUE	chrXV	335001	376486	41486	*	FALSE	0.032	chrXV_354333_AT_A	EtOH_Glucose;;1	0.0001	0.000100005	6.84367	chrXV_341165_G_A_75443	chrXV_297528_T_C_75130	chrXV_410276_C_A_75943	chrXV_341165_G_A	chrXV_297528_T_C
Diamide;1.5mM;3	YIL169C	CSS1	chrIX	20915	28521	7607	-	0.583241	YJM978x	decrease	0.154264	0.224205	chrIX_29543_C_G				0.0001	0.000100005	59.6001	chrIX_29272_A_T_25757	chrIX_29074_T_G_25753	chrIX_29781_G_A_25762	chrIX_29272_A_T	chrIX_29074_T_G	chrIX_29781_G_A	-0.417968	0.106619	chrIX	9.38069e-62	chrIX_179_C_T chrIX_29044_T_C chrIX_30497_C_T chrIX_30497_C_T	381	TRUE	chrIX	179	30858	30680	*	FALSE	0.104003	chrIX_29272_A_T	Diamide;1.5mM;3	0.0001	0.000100005	34.4542	chrIX_8147_T_C_37066	chrIX_8147_T_C_37066	chrIX_33599_A_T,C_37257	chrIX_8147_T_C	chrIX_8147_T_C
YPD;15;1	YIL169C	CSS1	chrIX	20915	28521	7607	-	0.583122	YJM978x	decrease	0.15498	0.121116	chrIX_29543_C_G				0.0001	0.000100005	28.2333	chrIX_31082_A_T_37212	chrIX_8147_T_C_37066	chrIX_31909_A_G_37214	chrIX_31082_A_T	chrIX_8147_T_C	chrIX_31909_A_G	-0.351122	0.105858	chrIX	2.15151e-30	chrIX_8147_T_C chrIX_8147_T_C chrIX_34809_G_A chrIX_35804_C_T	393	TRUE	chrIX	8147	31312	23166	*	FALSE	0.0145956	chrIX_31082_A_T	YPD;15;1	0.0001	0.000100005	45.6177	chrIX_29272_A_T_25757	chrIX_29272_A_T_25757	chrIX_34730_T_A_25813	chrIX_29272_A_T	chrIX_29272_A_T
Xylose;;1	YNL139C	THO2	chrXIV	360924	365874	4951	-	0.578206	YJM145x	decrease	0.155705	0.116104	chrXIV_358910_T_C,A				0.0109	0.00406725	4.98961	chrXIV_358910_T_C,A_42713	chrXIV_354740_A_G_42663	chrXIV_391364_T_C_42834	chrXIV_358910_T_C,A	chrXIV_354740_A_G	chrXIV_391364_T_C	-0.146658	0.0201911	chrXIV	1.63883e-06	chrXIV_340939_G_A chrXIV_345712_A_G,T chrXIV_367502_A_G chrXIV_369556_C_T	377	TRUE	chrXIV	333907	369034	35128	*	FALSE	0.0537164	chrXIV_358910_T_C,A	Xylose;;1	0.0001	0.000100005	27.9645	chrXIV_364317_A_T_54858	chrXIV_363393_T_A,G_54854	chrXIV_364987_G_A_54861	chrXIV_364317_A_T	chrXIV_363393_T_A,G
YPD;15;1	YOL081W	IRA2	chrXV	170522	180432	9911	+	0.575385	RMx	decrease	0.156434	0.0369231	chrXV_183788_A_G				0.0001	0.000100005	19.0712	chrXV_160981_AG_A,*_43620	chrXV_159827_A_G_43608	chrXV_168885_C_T_43736	chrXV_160981_AG_A,*	chrXV_159827_A_G	chrXV_168885_C_T	-0.21653	0.0467071	chrXV	2.62261e-21	chrXV_151176_A_G chrXV_155779_C_T chrXV_167344_T_A chrXV_170921_A_G	A	TRUE	chrXV	135786	184291	48506	*	FALSE	0.0348506	chrXV_160981_AG_A,*	YPD;15;1	0.0001	0.000100005	20.4257	chrXV_185932_A_T_69757	chrXV_170682_T_A_69616	chrXV_190129_T_A_69791	chrXV_185932_A_T	chrXV_170682_T_A
EtOH;;1	YKL038W	RGT1	chrXI	364899	369240	4342	+	0.575221	CLIB219x	decrease	0.157159	0.106195	chrXI_364335_A_G,AATATG,*				0.0001	0.000100005	15.7929	chrXI_361682_G_A_53273	chrXI_355968_G_GCA_53227	chrXI_367790_G_A_53348	chrXI_361682_G_A	chrXI_355968_G_GCA	chrXI_367790_G_A	0.1368	0.020687	chrXI	3.20887e-18	chrXI_351443_C_A chrXI_356276_C_T chrXI_366957_C_T chrXI_368904_G_A	3028	TRUE	chrXI	336636	366486	29851	*	FALSE	0.0690691	chrXI_361682_G_A	EtOH;;1	0.0001	0.000100005	33.8356	chrXI_371740_G_C_44456	chrXI_364487_TG_T_44407	chrXI_371740_G_C_44456	chrXI_371740_G_C	chrXI_364487_TG_T
Fluconazole;100uM;2	YBL004W	UTP20	chrII	227117	235254	8138	+	0.574186	YJM978x	increase	0.157883	0.110374	chrII_233405_C_T				0.0001	0.000100005	38.814	chrII_217504_C_T_2426	chrII_216520_A_G_2423	chrII_218039_A_G_2429	chrII_217504_C_T	chrII_216520_A_G	chrII_218039_A_G	0.236145	0.0571994	chrII	2.54052e-38	chrII_216520_A_G chrII_216520_A_G chrII_218252_A_G chrII_218663_C_T	381	TRUE	chrII	216520	230255	13736	*	FALSE	0.212677	chrII_217504_C_T	Fluconazole;100uM;2	0.0001	0.000100005	40.5676	chrII_233405_C_T_3425	chrII_220064_T_A_3351	chrII_243495_A_G_3492	chrII_233405_C_T	chrII_220064_T_A
Mannose;;1	YLL007C	LMO1	chrXII	134144	136321	2178	-	0.571429	YJM454a	increase	0.158611	0.200608	chrXII_134655_T_C				0.0006	0.000212542	11.4618	chrXII_135409_A_G_48003	chrXII_132742_T_C_47992	chrXII_138705_A_G_48019	chrXII_135409_A_G	chrXII_132742_T_C	chrXII_138705_A_G	-0.171977	0.0206588	chrXII	1.29234e-12	chrXII_129660_G_A chrXII_131705_A_G chrXII_151141_ATTTG_A chrXII_157169_C_G	3008	TRUE	chrXII	128116	150955	22840	*	FALSE	0.0634202	chrXII_135409_A_G	Mannose;;1	0.0001	0.000100005	13.9003	chrXII_130614_A_C_35280	chrXII_127342_C_T,CT,*_35266	chrXII_132368_G_A_35296	chrXII_130614_A_C	chrXII_127342_C_T,CT,*
EtOH_Glucose;;1	YOR140W	SFL1	chrXV	586981	589610	2630	+	0.566176	YJM981x	increase	0.159348	0.0794118	chrXV_589221_C_T				0.0042	0.00112721	4.97317	chrXV_601463_T_C_69749	chrXV_569690_G_A_69597	chrXV_610496_G_C,T_69835	chrXV_601463_T_C	chrXV_569690_G_A	chrXV_610496_G_C,T	0.125952	0.0218569	chrXV	4.14155e-06	chrXV_581732_G_A chrXV_585728_T_C chrXV_616831_C_T chrXV_621669_A_G	3004	TRUE	chrXV	574955	604256	29302	*	FALSE	0.037037	chrXV_601463_T_C	EtOH_Glucose;;1	0.0001	0.000100005	11.5951	chrXV_588544_G_A_32435	chrXV_560186_A_G_32287	chrXV_589907_G_GA_32447	chrXV_588544_G_A	chrXV_560186_A_G
Neomycin;5mg/mL;2	YDR457W	TOM1	chrIV	1369588	1379824	10237	+	0.565217	YJM145x	decrease	0.160085	0.163043	chrIV_1368825_C_T				0.0001	0.000100005	12.3756	chrIV_1394087_C_T_12059	chrIV_1384540_G_A_12045	chrIV_1395046_C_G_12060	chrIV_1394087_C_T	chrIV_1384540_G_A	chrIV_1395046_C_G	-0.159561	0.0278373	chrIV	9.02715e-14	chrIV_1376004_A_T chrIV_1383989_A_G chrIV_1406526_A_G chrIV_1408760_T_C	377	TRUE	chrIV	1368825	1405690	36866	*	FALSE	0.286533	chrIV_1394087_C_T	Neomycin;5mg/mL;2	0.6676	0.107224	5.48643	chrIV_1362236_C_T_16055	chrIV_1361086_C_T_16054	chrIV_1373834_T_C_16107	chrIV_1362236_C_T	chrIV_1361086_C_T
Maltose;;1	YOL081W	IRA2	chrXV	170522	180432	9911	+	0.565217	RMx	decrease	0.160817	0.130435	chrXV_178159_C_T				0.0001	0.000100005	20.3761	chrXV_190129_T_A_69791	chrXV_171511_A_C_69622	chrXV_192333_T_G_69793	chrXV_190129_T_A	chrXV_171511_A_C	chrXV_192333_T_G	0.198539	0.0440178	chrXV	3.87311e-22	chrXV_180408_A_AT chrXV_181856_T_C chrXV_191548_T_C chrXV_193147_G_A	376	TRUE	chrXV	178159	193761	15603	*	FALSE	0.216426	chrXV_190129_T_A	Maltose;;1	0.0001	0.000100005	24.9612	chrXV_159369_G_A_43606	chrXV_150111_G_A_43529	chrXV_184291_A_C_43877	chrXV_159369_G_A	chrXV_150111_G_A
Cobalt_Chloride;2mM;2	YJR126C	VPS70	chrX	656108	658802	2695	-	0.561517	BYa	decrease	0.161556	0.140685	chrX_658912_C_T				0.0001	0.000100005	16.3076	chrX_656567_C_T_27719	chrX_651274_C_T_27711	chrX_661926_G_A_27748	chrX_656567_C_T	chrX_651274_C_T	chrX_661926_G_A	0.16398	0.0257488	chrX	2.40152e-17	chrX_644500_A_G chrX_646356_G_A chrX_661788_C_T chrX_663082_A_G	A	TRUE	chrX	644097	661920	17824	*	FALSE	0.121272	chrX_656567_C_T	Cobalt_Chloride;2mM;2	0.0001	0.000100005	20.869	chrX_658912_C_T_28094	chrX_656567_C_T_28086	chrX_663098_A_G_28131	chrX_658912_C_T	chrX_656567_C_T
Manganese_Sulfate;;1	YGL181W	GTS1	chrVII	157751	159579	1829	+	0.561509	YJM145x	increase	0.16229	0.280755	chrVII_158039_TG_T				0.0001	0.000100005	12.057	chrVII_166123_A_C_17760	chrVII_166123_A_C_17760	chrVII_186595_A_G_17779	chrVII_166123_A_C	chrVII_166123_A_C	chrVII_186595_A_G	0.194712	0.0391115	chrVII	5.49758e-13	chrVII_156590_T_C chrVII_160418_A_G chrVII_175977_C_A chrVII_180677_G_T	377	TRUE	chrVII	150494	173121	22628	*	FALSE	0.456366	chrVII_166123_A_C	Manganese_Sulfate;;1	0.0001	0.000100005	70.4698	chrVII_157822_C_G_23630	chrVII_153827_T_C_23597	chrVII_164429_T_A_23676	chrVII_157822_C_G	chrVII_153827_T_C
Raffinose;;1	YIL119C	RPI1	chrIX	136381	138813	2433	-	0.56145	YJM454a	decrease	0.163021	0.374165	chrIX_139426_G_A				0.0001	0.000100005	52.6144	chrIX_139426_G_A_26341	chrIX_138115_T_TA_26333	chrIX_139466_T_A,C_26342	chrIX_139426_G_A	chrIX_138115_T_TA	chrIX_139466_T_A,C	0.326247	0.0952941	chrIX	4.03604e-54	chrIX_135577_A_G chrIX_137242_G_A chrIX_139426_G_A chrIX_139426_G_A	381	TRUE	chrIX	135577	139466	3890	*	FALSE	0.272808	chrIX_139426_G_A	Raffinose;;1	0.0001	0.000100005	38.0007	chrIX_137062_A_G_35858	chrIX_134104_C_A_35829	chrIX_138693_T_C_35885	chrIX_137062_A_G	chrIX_134104_C_A
EGTA;5mM;3	YDR032C	PST2	chrIV	503981	506420	2440	-	0.560029	YPS163a	decrease	0.163752	0.0495293	chrIV_504046_C_T				0.0022	0.00042254	9.4405	chrIV_504046_C_T_12663	chrIV_474897_C_T_12539	chrIV_549275_A_G_13355	chrIV_504046_C_T	chrIV_474897_C_T	chrIV_549275_A_G	-0.170171	0.0200782	chrIV	1.9625e-11	chrIV_483836_T_G,A chrIV_486540_A_G chrIV_512840_T_C chrIV_519882_T_C	376	TRUE	chrIV	478977	510505	31529	*	FALSE	0.0471854	chrIV_504046_C_T	EGTA;5mM;3	0.0001	0.000100005	15.3125	chrIV_506476_C_T_11275	chrIV_502245_G_A_11222	chrIV_523919_G_A_11569	chrIV_506476_C_T	chrIV_502245_G_A
Fluconazole;100uM;2	YLR256W	HAP1	chrXII	646184	651019	4836	+	0.55977	BYa	decrease	0.16448	0.0791931	chrXII_650212_T_C				0.0001	0.000100005	100.162	chrXII_656891_G_A_33805	chrXII_656891_G_A_33805	chrXII_657926_GTTT_GTT,GT,G_33834	chrXII_656891_G_A	chrXII_656891_G_A	chrXII_657926_GTTT_GTT,GT,G	0.525673	0.286749	chrXII	1.3259e-103	chrXII_649258_C_T chrXII_649837_A_G chrXII_658054_A_T chrXII_658054_A_T	A	TRUE	chrXII	649837	657926	8090	*	FALSE	0.0570071	chrXII_657234_T_G	Fluconazole;100uM;2	0.0001	0.000100005	119.09	chrXII_649837_A_G_34144	chrXII_648877_T_C_34140	chrXII_650831_A_AGTGATGCGGTTTGTTTATG,G_34162	chrXII_649837_A_G	chrXII_648877_T_C
Fructose;;1	YAL053W	FLC2	chrI	45460	48406	2947	+	0.555398	YPS1009x	increase	0.165215	0.159091	chrI_47206_A_G				0.0001	0.000100005	8.15404	chrI_59220_C_T_955	chrI_38980_G_A_784	chrI_71119_A_AG,*_1054	chrI_59220_C_T	chrI_38980_G_A	chrI_71119_A_AG,*	0.134124	0.0247144	chrI	1.36305e-08	chrI_44384_A_G chrI_52310_A_G chrI_65134_G_A chrI_67421_A_C	2999	TRUE	chrI	46723	66033	19311	*	FALSE	0.0985353	chrI_59220_C_T	Fructose;;1	0.0001	0.000100005	11.1984	chrI_47206_A_G_285	chrI_39381_T_A_237	chrI_53740_C_T_321	chrI_47206_A_G	chrI_39381_T_A
YPD;;1	YNL139C	THO2	chrXIV	360924	365874	4951	-	0.554721	YJM145x	decrease	0.165948	0.284406	chrXIV_364987_G_A				0.0001	0.000100005	19.868	chrXIV_366458_C_A_42760	chrXIV_358880_T_C_42712	chrXIV_367094_G_A_42767	chrXIV_366458_C_A	chrXIV_358880_T_C	chrXIV_367094_G_A	-0.259311	0.0592732	chrXIV	1.32864e-21	chrXIV_358519_C_G chrXIV_361529_C_A chrXIV_367502_A_G chrXIV_368706_A_G	377	TRUE	chrXIV	364611	368577	3967	*	FALSE	0.231771	chrXIV_366458_C_A	YPD;;1	0.0001	0.000100005	40.0802	chrXIV_364317_A_T_54858	chrXIV_358013_T_C_54815	chrXIV_364987_G_A_54861	chrXIV_364317_A_T	chrXIV_358013_T_C
YPD;;1	YHL043W	ECM34	chrVIII	14586	15539	954	+	0.553309	YJM981x	decrease	0.166681	0.387868	chrVIII_14636_A_G				0.0001	0.000100005	24.0157	chrVIII_14636_A_G_13686	chrVIII_988_C_T_13559	chrVIII_17359_A_T_13704	chrVIII_14636_A_G	chrVIII_988_C_T	chrVIII_17359_A_T	-0.413317	0.0328931	chrVIII	4.31901e-26	chrVIII_988_C_T chrVIII_988_C_T chrVIII_16805_A_G chrVIII_16906_A_C	3003	TRUE	chrVIII	988	14636	13649	*	FALSE	0.0181038	chrVIII_14636_A_G	YPD;;1	0.0001	0.000100005	15.22	chrVIII_19760_T_A,G_33338	chrVIII_16463_T_C_33304	chrVIII_19760_T_A,G_33338	chrVIII_19760_T_A,G	chrVIII_16463_T_C
6-azauracil;50ug/mL;3	YGR154C	GTO1	chrVII	796771	798204	1434	-	0.552	M22	decrease	0.167414	0.16	chrVII_796676_T_C				0.0001	0.000100005	24.2622	chrVII_799451_C_T_34984	chrVII_797667_G_A_34967	chrVII_800403_C_G_34996	chrVII_799451_C_T	chrVII_797667_G_A	chrVII_800403_C_G	-0.166597	0.0292932	chrVII	3.89103e-26	chrVII_798845_C_T chrVII_799451_C_T chrVII_800250_T_C chrVII_800403_C_G	3028	TRUE	chrVII	797667	800403	2737	*	FALSE	0.371355	chrVII_799451_C_T	6-azauracil;50ug/mL;3	0.0001	0.000100005	12.5873	chrVII_795589_T_C_18580	chrVII_795142_C_T_18576	chrVII_796676_T_C_18589	chrVII_795589_T_C	chrVII_795142_C_T
Glycerol;;1	YJR003C	MRX12	chrX	440820	442730	1911	-	0.548742	YJM981x	increase	0.168151	0.16969	chrX_441135_T_G				0.0001	0.000100005	55.0976	chrX_437923_A_G_20371	chrX_421583_T_C_20277	chrX_440709_C_G_20382	chrX_437923_A_G	chrX_421583_T_C	chrX_440709_C_G	0.443853	0.190969	chrX	1.19375e-56	chrX_421583_T_C chrX_422219_T_C chrX_446307_G_A chrX_449418_G_A	3003	TRUE	chrX	419079	450888	31810	*	FALSE	0.0930041	chrX_437923_A_G	Glycerol;;1	0.0001	0.000100005	89.6988	chrX_441135_T_G_43114	chrX_419079_A_G_43013	chrX_442770_AGAACTAGAAAAGTATTATTAGAGTTAAGATAT_A_43120	chrX_441135_T_G	chrX_419079_A_G
Galactose;;1	YOL082W	ATG19	chrXV	167664	170521	2858	+	0.548223	RMx	decrease	0.168886	0.157573	chrXV_168263_A_G				0.0001	0.000100005	20.6169	chrXV_168263_A_G_69588	chrXV_168074_A_G_69584	chrXV_188984_AGTT_A_69779	chrXV_168263_A_G	chrXV_168074_A_G	chrXV_188984_AGTT_A	0.305955	0.0743006	chrXV	8.85549e-23	chrXV_164993_T_G chrXV_165557_G_A chrXV_169869_C_T chrXV_175142_C_T	376	TRUE	chrXV	159655	182884	23230	*	FALSE	0.172619	chrXV_168263_A_G	Galactose;;1	0.0001	0.000100005	32.2393	chrXV_166989_G_A_43690	chrXV_148894_A_G_43522	chrXV_168592_G_A_43733	chrXV_166989_G_A	chrXV_148894_A_G
6-azauracil;50ug/mL;3	YNL083W	SAL1	chrXIV	471239	473125	1887	+	0.545083	BYa	decrease	0.169625	0.319738	chrXIV_471767_A_G				0.0001	0.000100005	10.2263	chrXIV_476037_T_C_41556	chrXIV_466588_T_G_41538	chrXIV_476709_GT_G_41557	chrXIV_476037_T_C	chrXIV_466588_T_G	chrXIV_476709_GT_G	0.179098	0.0329014	chrXIV	1.73385e-12	chrXIV_463554_A_T chrXIV_466588_T_G chrXIV_476709_GT_G chrXIV_482161_A_T	375	TRUE	chrXIV	463554	483540	19987	*	FALSE	0.191268	chrXIV_476037_T_C	6-azauracil;50ug/mL;3	0.0001	0.000100005	47.4597	chrXIV_471767_A_G_41208	chrXIV_466588_T_G_41198	chrXIV_473370_C_G_41214	chrXIV_471767_A_G	chrXIV_466588_T_G
Congo_Red;75ug/mL;3	YHL041W		chrVIII	16755	18463	1709	+	0.542373	YJM981x	decrease	0.170367	0.423729	chrVIII_17359_A_T				0.0001	0.000100005	34.6162	chrVIII_14865_G_A_13690	chrVIII_14636_A_G_13686	chrVIII_16495_G_C_13696	chrVIII_14865_G_A	chrVIII_14636_A_G	chrVIII_16495_G_C	-0.496212	0.0336532	chrVIII	2.7205e-37	chrVIII_988_C_T chrVIII_11889_T_G chrVIII_16403_G_A chrVIII_16886_G_C,GTTGGTTAC	3003	TRUE	chrVIII	988	15928	14941	*	FALSE	0.0778346	chrVIII_14865_G_A	Congo_Red;75ug/mL;3	0.0001	0.000100005	17.0584	chrVIII_18855_A_G_33333	chrVIII_17359_A_T_33312	chrVIII_19760_T_A,G_33338	chrVIII_18855_A_G	chrVIII_17359_A_T
YNB;;1	YOL082W	ATG19	chrXV	167664	170521	2858	+	0.542021	RMx	decrease	0.171106	0.0799704	chrXV_169572_C_T				0.0046	0.00235531	7.26737	chrXV_169572_C_T_69604	chrXV_110931_G_GA_69218	chrXV_192333_T_G_69793	chrXV_169572_C_T	chrXV_110931_G_GA	chrXV_192333_T_G	0.204677	0.0312373	chrXV	6.2756e-09	chrXV_147162_G_A chrXV_153513_G_C chrXV_186759_T_C chrXV_190129_T_A	376	TRUE	chrXV	144354	181607	37254	*	FALSE	0.0378151	chrXV_169572_C_T	YNB;;1	0.0001	0.000100005	13.8086	chrXV_171150_T_C_43758	chrXV_147274_T_A_43503	chrXV_186481_G_A_43881	chrXV_171150_T_C	chrXV_147274_T_A
Zeocin;25ug/mL;3	YJL005W	CYR1	chrX	424633	431412	6780	+	0.539121	YJM981x	decrease	0.171849	0.120503	chrX_445483_G_A				0.0001	0.000100005	63.8532	chrX_445483_G_A_43135	chrX_430343_G_T_43066	chrX_446453_A_G_43142	chrX_445483_G_A	chrX_430343_G_T	chrX_446453_A_G	-0.421216	0.152326	chrX	2.06971e-65	chrX_430097_T_G chrX_430343_G_T chrX_447484_T_C chrX_448328_C_T	3004	TRUE	chrX	430343	448328	17986	*	FALSE	0.235754	chrX_445483_G_A	Zeocin;25ug/mL;3	0.0001	0.000100005	75.6545	chrX_423483_A_G_20291	chrX_422851_ATACCCG_A_20288	chrX_452288_C_T_20451	chrX_423483_A_G	chrX_422851_ATACCCG_A
Xylose;;1	YOR043W	WHI2	chrXV	410265	412667	2403	+	0.535878	CLIB219x	increase	0.172597	0.149177	chrXV_412177_C_T				0.0001	0.000100005	11.0532	chrXV_414198_A_T_66536	chrXV_400596_C_T_66471	chrXV_425239_T_A_66623	chrXV_414198_A_T	chrXV_400596_C_T	chrXV_425239_T_A	0.180271	0.0279133	chrXV	1.12959e-12	chrXV_400596_C_T chrXV_405260_G_T chrXV_425872_G_A chrXV_427391_C_T	3043	TRUE	chrXV	407441	424856	17416	*	FALSE	0.0360874	chrXV_414198_A_T	Xylose;;1	0.0001	0.000100005	32.4252	chrXV_412177_C_T_78793	chrXV_411579_G_A_78789	chrXV_412559_T_C_78801	chrXV_412177_C_T	chrXV_411579_G_A
Diamide;1.5mM;3	YHL036W	MUP3	chrVIII	26210	27928	1719	+	0.535519	M22	decrease	0.173341	0.535519	chrVIII_27733_T_C				0.0143	0.0392944	7.69568	chrVIII_26177_C_T_20297	chrVIII_13787_A_G_20234	chrVIII_30979_C_T_20310	chrVIII_26177_C_T	chrVIII_13787_A_G	chrVIII_30979_C_T	-0.183212	0.0208763	chrVIII	9.69565e-10	chrVIII_16671_A_G chrVIII_17127_T_A chrVIII_44706_G_A chrVIII_47341_A_G	375	TRUE	chrVIII	15239	40899	25661	*	FALSE	0.109294	chrVIII_26177_C_T	Diamide;1.5mM;3	0.0001	0.000100005	72.0602	chrVIII_23964_C_T_37241	chrVIII_19352_G_A_37188	chrVIII_25004_C_T_37246	chrVIII_23964_C_T	chrVIII_19352_G_A
Manganese_Sulfate;;1	YOL029C		chrXV	269728	270525	798	-	0.534103	I14a	decrease	0.174086	0.424092	chrXV_270526_C_G				0.0001	0.000100005	48.9546	chrXV_270526_C_G_61909	chrXV_270103_T_C_61906	chrXV_270735_T_C_61913	chrXV_270526_C_G	chrXV_270103_T_C	chrXV_270735_T_C	0.293602	0.0860901	chrXV	2.64799e-53	chrXV_270103_T_C chrXV_270103_T_C chrXV_270906_C_T chrXV_271041_C_T	3000	TRUE	chrXV	270103	270906	804	*	FALSE	0.441581	chrXV_270526_C_G	Manganese_Sulfate;;1	0.0001	0.000100005	125.647	chrXV_270164_G_A_74892	chrXV_270164_G_A_74892	chrXV_270164_G_A_74892	chrXV_270164_G_A	chrXV_270164_G_A
EGTA;5mM;3	YGL203C	KEX1	chrVII	112240	115360	3121	-	0.53317	BYa	increase	0.174829	0.122461	chrVII_113828_A_C				0.0001	0.000285799	6.26127	chrVII_113471_G_A_16416	chrVII_97616_T_C_16284	chrVII_188282_T_C_16924	chrVII_113471_G_A	chrVII_97616_T_C	chrVII_188282_T_C	-0.136425	0.0218514	chrVII	9.17448e-09	chrVII_95090_G_A chrVII_96337_T_C chrVII_124205_C_T chrVII_127817_T_C	375	TRUE	chrVII	95090	120545	25456	*	FALSE	0.0367925	chrVII_113471_G_A	EGTA;5mM;3	0.0001	0.000100005	19.2676	chrVII_113828_A_C_16123	chrVII_101050_A_G_16024	chrVII_116907_C_T_16139	chrVII_113828_A_C	chrVII_101050_A_G
YNB;ph3;1	YIL128W	MET18	chrIX	113521	116963	3443	+	0.53312	CBS2888a	decrease	0.175568	0.243782	chrIX_113637_G_A				0.0001	0.000100005	13.7178	chrIX_113637_G_A_37808	chrIX_97661_A_T,C_37728	chrIX_129799_T_C_37853	chrIX_113637_G_A	chrIX_97661_A_T,C	chrIX_129799_T_C	0.192646	0.0384265	chrIX	1.33142e-15	chrIX_99731_C_T chrIX_101294_T_C chrIX_127868_C_T chrIX_130876_C_T	3004	TRUE	chrIX	89302	136044	46743	*	FALSE	0.0923507	chrIX_113637_G_A	YNB;ph3;1	0.0001	0.000100005	14.0369	chrIX_118811_C_T_34425	chrIX_104830_A_G_34357	chrIX_127338_GTTT_G,GT_34452	chrIX_118811_C_T	chrIX_104830_A_G
Magnesium_Chloride;;1	YOR109W	INP53	chrXV	525046	528770	3725	+	0.530632	YJM454a	decrease	0.17631	0.0849011	chrXV_528112_T_G				0.0001	0.000100005	15.6505	chrXV_519771_C_T_50944	chrXV_514120_A_T_50805	chrXV_529863_G_A_51019	chrXV_519771_C_T	chrXV_514120_A_T	chrXV_529863_G_A	0.183058	0.03625	chrXV	4.31858e-16	chrXV_506857_CA_CAAA,CAA,C chrXV_509814_C_T chrXV_537018_T_A chrXV_541182_G_A	381	TRUE	chrXV	508274	533670	25397	*	FALSE	0.0235064	chrXV_519771_C_T	Magnesium_Chloride;;1	0.0001	0.000100005	19.1834	chrXV_528112_T_G_68356	chrXV_514344_T_C_68130	chrXV_538395_G_A_68433	chrXV_528112_T_G	chrXV_514344_T_C
Mannose;;1	YNL085W	MKT1	chrXIV	466886	469837	2952	+	0.530161	RMx	decrease	0.17705	0.224299	chrXIV_466588_T_G				0.3265	0.0649349	9.63085	chrXIV_466588_T_G_41198	chrXIV_466103_G_A_41197	chrXIV_470844_A_G_41207	chrXIV_466588_T_G	chrXIV_466103_G_A	chrXIV_470844_A_G	0.256671	0.0200629	chrXIV	9.65427e-11	chrXIV_461485_A_G chrXIV_463554_A_T chrXIV_470844_A_G chrXIV_473303_T_C	A	TRUE	chrXIV	461485	473303	11819	*	FALSE	0.21256	chrXIV_466588_T_G	Mannose;;1	0.0001	0.000100005	2.36425	chrXIV_486859_T_A_41223	chrXIV_54504_T_A_40269	chrXIV_488598_G_C_41227	chrXIV_486859_T_A	chrXIV_54504_T_A
Glycerol;;1	YIR018C-A		chrIX	385455	387635	2181	-	0.520054	CBS2888a	decrease	0.177811	0.0741784	chrIX_386355_G_A				0.0001	0.000100005	10.8768	chrIX_389030_C_T,A_36072	chrIX_376864_T_A_35803	chrIX_396943_C_T_36226	chrIX_389030_C_T,A	chrIX_376864_T_A	chrIX_396943_C_T	0.15859	0.0255293	chrIX	1.49948e-12	chrIX_379493_C_G chrIX_382403_A_G chrIX_396203_A_T chrIX_397259_T_A	3043	TRUE	chrIX	379439	393984	14546	*	FALSE	0.0380583	chrIX_389030_C_T,A	Glycerol;;1	0.0001	0.000100005	6.7575	chrIX_386355_G_A_39660	chrIX_383467_G_A,GTA_39594	chrIX_399838_C_G_39994	chrIX_386355_G_A	chrIX_383467_G_A,GTA
EGTA;5mM;3	YIL169C	CSS1	chrIX	20915	28521	7607	-	0.519266	YJM978x	decrease	0.17857	0.101144	chrIX_29543_C_G				0.0001	0.000100005	8.63831	chrIX_33244_T_C_37233	chrIX_8147_T_C_37066	chrIX_35983_C_T_37283	chrIX_33244_T_C	chrIX_8147_T_C	chrIX_35983_C_T	-0.162239	0.0229173	chrIX	2.18406e-11	chrIX_29725_T_C chrIX_29781_G_A chrIX_40605_C_G,T chrIX_45886_A_G	393	TRUE	chrIX	8213	35983	27771	*	FALSE	0.039039	chrIX_33244_T_C	EGTA;5mM;3	0.0001	0.000100005	31.636	chrIX_29272_A_T_25757	chrIX_29044_T_C_25752	chrIX_34351_A_G_25812	chrIX_29272_A_T	chrIX_29044_T_C
Tunicamycin;3uM;3	YOR050C		chrXV	424001	424730	730	-	0.512278	CLIB219x	increase	0.179343	0.153238	chrXV_423822_AT_A				0.0001	0.000100005	26.1925	chrXV_424582_T_C_66615	chrXV_418159_G_C_66554	chrXV_425239_T_A_66623	chrXV_424582_T_C	chrXV_418159_G_C	chrXV_425239_T_A	0.207463	0.0354379	chrXV	1.14734e-26	chrXV_415011_A_G chrXV_417786_C_T chrXV_425211_T_C chrXV_425872_G_A	3043	TRUE	chrXV	418551	425239	6689	*	FALSE	0.0668945	chrXV_424582_T_C	Tunicamycin;3uM;3	0.0001	0.000100005	51.8516	chrXV_423822_AT_A_78926	chrXV_423451_G_A_78925	chrXV_424606_C_T_78938	chrXV_423822_AT_A	chrXV_423451_G_A
Xylose;;1	YOR081C	TGL5	chrXV	476865	479241	2377	-	0.511682	YPS163a	increase	0.180113	0.143692	chrXV_478354_A_G				0.0029	0.00103474	6.05167	chrXV_483090_GTT_G,GTTT,GT_71776	chrXV_411025_C_T_71223	chrXV_527698_C_T_72212	chrXV_483090_GTT_G,GTTT,GT	chrXV_411025_C_T	chrXV_527698_C_T	0.176234	0.0278667	chrXV	1.12535e-07	chrXV_461683_G_A chrXV_464262_T_C chrXV_489305_G_A chrXV_490304_C_T	376	TRUE	chrXV	460430	498558	38129	*	FALSE	0.0784314	chrXV_483090_GTT_G,GTTT,GT	Xylose;;1	0.0001	0.000100005	16.1984	chrXV_478354_A_G_60572	chrXV_454214_C_T_60404	chrXV_481731_C_T_60594	chrXV_478354_A_G	chrXV_454214_C_T
Fluconazole;100uM;2	YBL005W	PDR3	chrII	217165	220864	3700	+	0.510393	PW5a	increase	0.180883	0.129956	chrII_218831_G_A				0.0001	0.000100005	20.876	chrII_220405_G_A_4393	chrII_208686_G_A_4325	chrII_236489_C_A_4466	chrII_220405_G_A	chrII_208686_G_A	chrII_236489_C_A	-0.276719	0.0660932	chrII	5.55098e-21	chrII_217715_C_T chrII_218507_T_C,A chrII_242389_T_C chrII_243768_C_T	3001	TRUE	chrII	218741	240963	22223	*	FALSE	0.0663342	chrII_220405_G_A	Fluconazole;100uM;2	0.0001	0.000100005	30.9978	chrII_218414_A_C_3918	chrII_218414_A_C_3918	chrII_218630_C_T_3920	chrII_218414_A_C	chrII_218414_A_C
Manganese_Sulfate;;1	YFR033C	QCR6	chrVI	224149	224893	745	-	0.510051	YJM978x	decrease	0.18165	0.327268	chrVI_225030_A_C				0.0001	0.000100005	17.8684	chrVI_224563_T_A_25698	chrVI_224563_T_A_25698	chrVI_225406_G_A_25705	chrVI_224563_T_A	chrVI_224563_T_A	chrVI_225406_G_A	-0.168252	0.0249669	chrVI	2.29289e-17	chrVI_222102_C_T chrVI_222940_T_C chrVI_225899_G_A chrVI_226815_C_T	393	TRUE	chrVI	221515	225913	4399	*	FALSE	0.188875	chrVI_224563_T_A	Manganese_Sulfate;;1	0.0001	0.000100005	49.1536	chrVI_225030_A_C_17466	chrVI_224563_T_A_17461	chrVI_225264_C_G_17467	chrVI_225030_A_C	chrVI_224563_T_A
Tunicamycin;3uM;3	YKL197C	PEX1	chrXI	70477	74397	3921	-	0.509225	YPS163a	increase	0.182415	0.0879459	chrXI_71068_T_C				0.0001	0.000100005	14.9244	chrXI_66663_A_G_39115	chrXI_54420_A_G_39057	chrXI_68117_G_A_39143	chrXI_66663_A_G	chrXI_54420_A_G	chrXI_68117_G_A	0.147743	0.0278674	chrXI	5.45506e-18	chrXI_52628_G_A chrXI_55347_T_C chrXI_69662_T_C chrXI_72294_C_T	B	TRUE	chrXI	52628	73999	21372	*	FALSE	0.0866409	chrXI_66663_A_G	Tunicamycin;3uM;3	0.0001	0.000100005	23.1909	chrXI_71068_T_C_45907	chrXI_67691_A_C_45850	chrXI_74105_AT_A_45939	chrXI_71068_T_C	chrXI_67691_A_C
Sorbitol;1.5M;2	YBR114W	RAD16	chrII	466648	469683	3036	+	0.508982	CLIB219x	decrease	0.183177	0.0898204	chrII_467946_T_C				0.0001	0.000100005	12.5759	chrII_467946_T_C_5281	chrII_454001_T_C_5136	chrII_491316_T_C_5419	chrII_467946_T_C	chrII_454001_T_C	chrII_491316_T_C	0.157489	0.022766	chrII	6.53864e-13	chrII_452576_T_C,* chrII_456438_C_A chrII_476506_T_G chrII_479267_C_T	3028	TRUE	chrII	451218	476485	25268	*	FALSE	0.0387597	chrII_467946_T_C	Sorbitol;1.5M;2	0.0001	0.000100005	7.15692	chrII_485147_T_C_5455	chrII_463198_G_A_5339	chrII_501408_T_C_5534	chrII_485147_T_C	chrII_463198_G_A
Lactate;;1	YLR312C	ATG39	chrXII	757624	759155	1532	-	0.508876	PW5a	increase	0.183936	0.0840237	chrXII_758414_A_C				0.0208	0.0137978	4.54915	chrXII_744844_C_T_63826	chrXII_711045_T_G_63573	chrXII_760695_C_T_63947	chrXII_744844_C_T	chrXII_711045_T_G	chrXII_760695_C_T	-0.141102	0.021952	chrXII	7.50203e-06	chrXII_722344_C_G chrXII_725542_A_G chrXII_761895_C_G chrXII_764614_A_G	3001	TRUE	chrXII	722620	759469	36850	*	FALSE	0.0195178	chrXII_744844_C_T	Lactate;;1	0.0001	0.000100005	17.4014	chrXII_758414_A_C_55125	chrXII_747900_A_C_55058	chrXII_759469_A_T_55139	chrXII_758414_A_C	chrXII_747900_A_C
Copper_Sulfate;;1	YHR052W	CIC1	chrVIII	210499	212243	1745	+	0.508578	YJM978x	decrease	0.184691	0.491365	chrVIII_210269_ATTT_ATT,A,AT,ATTTT				0.0001	0.000100005	331.781	chrVIII_210269_ATTT_ATT,A,AT,ATTTT_34951	chrVIII_210269_ATTT_ATT,A,AT,ATTTT_34951	chrVIII_210588_C_T_34953	chrVIII_210269_ATTT_ATT,A,AT,ATTTT	chrVIII_210269_ATTT_ATT,A,AT,ATTTT	chrVIII_210588_C_T	-0.590722	0.820609	chrVIII	2.15972e-34	chrVIII_210269_ATTT_ATT,A,AT,ATTTT chrVIII_210269_ATTT_ATT,A,AT,ATTTT chrVIII_210588_C_T chrVIII_210588_C_T	393	TRUE	chrVIII	210269	212029	1761	*	FALSE	0.291397	chrVIII_210500_A_G	Copper_Sulfate;;1	0.0001	0.000100005	525.337	chrVIII_210269_ATTT_ATT,A,AT,ATTTT_24106	chrVIII_210269_ATTT_ATT,A,AT,ATTTT_24106	chrVIII_212293_C_T_24122	chrVIII_210269_ATTT_ATT,A,AT,ATTTT	chrVIII_210269_ATTT_ATT,A,AT,ATTTT
Trehalose;;1	YIR019C	FLO11	chrIX	387636	393964	6329	-	0.507023	CLIB413a	increase	0.185447	0.389298	chrIX_393886_G_C,*				0.0001	0.000100005	19.5173	chrIX_393886_G_C,*_24797	chrIX_393659_A_G_24795	chrIX_393995_A_G_24799	chrIX_393886_G_C,*	chrIX_393659_A_G	chrIX_393995_A_G	-0.277824	0.0905301	chrIX	4.71364e-21	chrIX_387502_T_C chrIX_388000_C_T,* chrIX_395026_T_G chrIX_397061_C_T	377	TRUE	chrIX	387908	395875	7968	*	FALSE	0.222989	chrIX_393886_G_C,*	Trehalose;;1	0.0001	0.000100005	19.1992	chrIX_386421_T_C_39536	chrIX_386286_G_A_39530	chrIX_397309_A_T_39689	chrIX_386421_T_C	chrIX_386286_G_A
Lactate;;1	YIR019C	FLO11	chrIX	387636	393964	6329	-	0.506977	CLIB413a	increase	0.186199	0.0837209	chrIX_393886_G_C,*				0.0001	0.000100005	12.4008	chrIX_393659_A_G_24795	chrIX_378389_A_T_24629	chrIX_395875_G_A_24812	chrIX_393659_A_G	chrIX_378389_A_T	chrIX_395875_G_A	-0.211297	0.0622208	chrIX	8.88234e-15	chrIX_386994_G_A chrIX_387653_TGGAAACTCTTTCTTAACCGTGTAAATCAAGTATGTCATTTCA_T chrIX_396851_T_C chrIX_397439_C_A	377	TRUE	chrIX	386249	404389	18141	*	FALSE	0.218597	chrIX_393659_A_G	Lactate;;1	0.0001	0.000100005	27.8875	chrIX_386492_G_C_39539	chrIX_386334_A_T_39531	chrIX_387143_CAAAAAAAAAAA_CAAA,CAAAAAAA,C_39563	chrIX_386492_G_C	chrIX_386334_A_T
EGTA;5mM;3	YLR256W	HAP1	chrXII	646184	651019	4836	+	0.506825	BYa	decrease	0.186947	0.0714948	chrXII_650212_T_C				0.0001	0.000100005	72.714	chrXII_649837_A_G_34144	chrXII_648649_C_T_34139	chrXII_658599_G_T_34195	chrXII_649837_A_G	chrXII_648649_C_T	chrXII_658599_G_T	0.508333	0.136279	chrXII	2.54651e-75	chrXII_648649_C_T chrXII_648649_C_T chrXII_657602_G_A chrXII_658054_A_T	375	TRUE	chrXII	648649	657536	8888	*	FALSE	0.0461496	chrXII_650212_T_C	EGTA;5mM;3	0.0001	0.000100005	72.7106	chrXII_656891_G_A_33805	chrXII_648649_C_T_33781	chrXII_657602_G_A_33818	chrXII_656891_G_A	chrXII_648649_C_T
YNB;ph8;1	YIR019C	FLO11	chrIX	387636	393964	6329	-	0.505665	YJM145x	decrease	0.187695	0.271933	chrIX_394234_G_A				0.0001	0.000100005	10.5039	chrIX_388426_A_G_34424	chrIX_384371_A_AC_34368	chrIX_395875_G_A_34483	chrIX_388426_A_G	chrIX_384371_A_AC	chrIX_395875_G_A	0.188407	0.0310737	chrIX	7.88026e-12	chrIX_379996_G_A chrIX_384118_A_G chrIX_398246_T_C chrIX_399657_A_C	B	TRUE	chrIX	375694	395617	19924	*	FALSE	0.0382979	chrIX_388520_A_C	YNB;ph8;1	0.0001	0.000100005	23.2754	chrIX_394234_G_A_24803	chrIX_388158_C_A_24718	chrIX_395026_T_G_24810	chrIX_394234_G_A	chrIX_388158_C_A
EtOH;;1	YLR315W	NKP2	chrXII	764472	765268	797	+	0.504926	YPS1009x	decrease	0.188441	0.197044	chrXII_764894_A_G				0.006	0.00362566	4.48358	chrXII_747710_G_GT_59096	chrXII_721595_G_A_58942	chrXII_771115_G_A_59293	chrXII_747710_G_GT	chrXII_721595_G_A	chrXII_771115_G_A	-0.142248	0.0203851	chrXII	3.78014e-07	chrXII_725507_T_C chrXII_727810_A_G chrXII_762443_C_A chrXII_764614_A_G	2999	TRUE	chrXII	722657	762443	39787	*	FALSE	0.0271739	chrXII_747710_G_GT	EtOH;;1	0.0001	0.000100005	12.5819	chrXII_764894_A_G_51640	chrXII_749785_C_T_51552	chrXII_767264_G_A_51654	chrXII_764894_A_G	chrXII_749785_C_T
Paraquat;0.75mM;3	YML109W	ZDS2	chrXIII	51297	54629	3333	+	0.504877	BYa	decrease	0.189184	0.0679365	chrXIII_52335_G_A				0.5311	0.0816031	9.71701	chrXIII_48814_A_G_36650	chrXIII_47907_A_G_36649	chrXIII_51951_T_A_36671	chrXIII_48814_A_G	chrXIII_47907_A_G	chrXIII_51951_T_A	0.235745	0.0355019	chrXIII	9.58107e-30	chrXIII_46758_C_T chrXIII_47637_C_G chrXIII_52335_G_A chrXIII_53073_A_G	A	TRUE	chrXIII	45801	55582	9782	*	FALSE	0.150546	chrXIII_48814_A_G	Paraquat;0.75mM;3	0.0001	0.000100005	20.1631	chrXIII_52335_G_A_37022	chrXIII_47637_C_G_36995	chrXIII_54192_A_C_37041	chrXIII_52335_G_A	chrXIII_47637_C_G
Manganese_Sulfate;;1	YKL057C	NUP120	chrXI	330695	334189	3495	-	0.503766	YPS1009x	increase	0.189926	0.143933	chrXI_331936_A_G				0.0001	0.000100005	31.4435	chrXI_324276_C_T_51424	chrXI_323380_C_T_51418	chrXI_325756_G_T_51436	chrXI_324276_C_T	chrXI_323380_C_T	chrXI_325756_G_T	0.208175	0.0508504	chrXI	1.71566e-33	chrXI_317831_A_G chrXI_319553_A_C chrXI_327038_G_A chrXI_329718_C_T	2999	TRUE	chrXI	320103	331291	11189	*	FALSE	0.112825	chrXI_324317_T_C	Manganese_Sulfate;;1	0.0001	0.000100005	15.9546	chrXI_331936_A_G_44787	chrXI_314820_T_C_44688	chrXI_335340_C_G_44802	chrXI_331936_A_G	chrXI_314820_T_C
Lithium_Chloride;100mM;2	YHL027W	RIM101	chrVIII	50845	53102	2258	+	0.503686	CLIB219x	increase	0.190664	0.0540541	chrVIII_49101_C_G				0.0001	0.000100005	15.5851	chrVIII_54138_G_T_30648	chrVIII_54138_G_T_30648	chrVIII_63051_C_T_30735	chrVIII_54138_G_T	chrVIII_54138_G_T	chrVIII_63051_C_T	0.195701	0.0352768	chrVIII	1.19929e-15	chrVIII_48948_C_T chrVIII_50172_G_T chrVIII_62455_G_A chrVIII_63097_G_A	3043	TRUE	chrVIII	29181	62234	33054	*	FALSE	0.0822123	chrVIII_54138_G_T	Lithium_Chloride;100mM;2	0.0001	0.000100005	47.0168	chrVIII_48651_T_C_37443	chrVIII_47642_G_A_37429	chrVIII_51378_A_T_37476	chrVIII_48651_T_C	chrVIII_47642_G_A
Magnesium_Chloride;;1	YPR014C		chrXVI	586387	588899	2513	-	0.502203	YJM978x	increase	0.191402	0.0704846	chrXVI_589172_C_T				0.0002	0.000310135	10.7543	chrXVI_589365_A_AATGTT_76572	chrXVI_584088_A_G_76506	chrXVI_594764_C_G_76661	chrXVI_589365_A_AATGTT	chrXVI_584088_A_G	chrXVI_594764_C_G	0.1804	0.0231253	chrXVI	2.94182e-14	chrXVI_581461_G_A chrXVI_586275_G_A chrXVI_590543_G_C chrXVI_593796_G_C	393	TRUE	chrXVI	585566	591382	5817	*	FALSE	0.25817	chrXVI_589365_A_AATGTT	Magnesium_Chloride;;1	0.0001	0.000100005	9.67956	chrXVI_580810_C_T_56563	chrXVI_537975_G_C_56272	chrXVI_610921_G_A_56888	chrXVI_580810_C_T	chrXVI_537975_G_C
Tunicamycin;3uM;3	YGR070W	ROM1	chrVII	627612	631376	3765	+	0.501838	YPS163a	increase	0.192138	0.0769098	chrVII_628576_A_G				0.0001	0.000100005	16.2139	chrVII_628576_A_G_30402	chrVII_617973_A_G_30336	chrVII_635585_T_G_30458	chrVII_628576_A_G	chrVII_617973_A_G	chrVII_635585_T_G	0.195285	0.0371583	chrVII	1.45919e-17	chrVII_620043_ATT_AT,A,ATTT,TTT chrVII_624410_T_G chrVII_637963_T_C chrVII_638835_C_T	376	TRUE	chrVII	626679	637963	11285	*	FALSE	0.0750729	chrVII_628576_A_G	Tunicamycin;3uM;3	0.0001	0.000100005	11.3756	chrVII_636162_G_A_26365	chrVII_628417_T_C_26303	chrVII_652754_T_C_26459	chrVII_636162_G_A	chrVII_628417_T_C
Congo_Red;75ug/mL;3	YDR246W	TRS23	chrIV	954134	955039	906	+	0.499905	273614xa	decrease	0.192875	0.499905	chrIV_954920_C_CA				0.0005	0.000166692	8.87912	chrIV_955222_C_T_7353	chrIV_954920_C_CA_7352	chrIV_993078_T_C_7471	chrIV_955222_C_T	chrIV_954920_C_CA	chrIV_993078_T_C	0.178055	0.0227554	chrIV	4.73239e-10	chrIV_938591_T_C chrIV_947317_G_A chrIV_955831_C_T chrIV_955831_C_T	3003	TRUE	chrIV	935955	955986	20032	*	FALSE	0.295559	chrIV_955222_C_T	Congo_Red;75ug/mL;3	0.0002	0.000112507	8.39224	chrIV_953693_T_C_16363	chrIV_929900_G_C_16253	chrIV_1011572_T_C_16775	chrIV_953693_T_C	chrIV_929900_G_C
Sorbitol;1.5M;2	YIL118W	RHO3	chrIX	138814	140529	1716	+	0.499856	YJM454a	decrease	0.193608	0.414627	chrIX_139426_G_A				0.0001	0.000100005	25.1699	chrIX_137242_G_A_26328	chrIX_135577_A_G_26318	chrIX_139466_T_A,C_26342	chrIX_137242_G_A	chrIX_135577_A_G	chrIX_139466_T_A,C	0.275405	0.0949082	chrIX	8.94384e-26	chrIX_126152_A_T chrIX_130702_T_C chrIX_139426_G_A chrIX_141332_C_T	381	TRUE	chrIX	130771	141727	10957	*	FALSE	0.116464	chrIX_137242_G_A	Sorbitol;1.5M;2	0.0001	0.000100005	40.5679	chrIX_139422_A_G_35890	chrIX_136840_G_A_35855	chrIX_139937_A_G_35893	chrIX_139422_A_G	chrIX_136840_G_A
Lactate;;1	YKL110C	KTI12	chrXI	228869	231052	2184	-	0.498643	Y10x	decrease	0.194341	0.197888	chrXI_231108_C_A				0.0364	0.0112543	7.3781	chrXI_229413_T_C_54811	chrXI_217265_C_T_54762	chrXI_240169_T_C_54918	chrXI_229413_T_C	chrXI_217265_C_T	chrXI_240169_T_C	-0.188598	0.0233787	chrXI	9.46336e-09	chrXI_219804_A_G chrXI_223560_C_T chrXI_240548_T_C chrXI_241359_G_A	3001	TRUE	chrXI	221295	240329	19035	*	FALSE	0.0807292	chrXI_229413_T_C	Lactate;;1	0.0002	0.000120008	7.51788	chrXI_231065_G_C_41525	chrXI_226854_T_C_41487	chrXI_235115_G_C_41552	chrXI_231065_G_C	chrXI_226854_T_C
Formamide;2%;2	YDL133C-A	RPL41B	chrIV	221247	222113	867	-	0.49778	Y10x	decrease	0.195072	0.22475	chrIV_221875_T_A				0.0002	0.000150013	6.76985	chrIV_230130_T_A_14009	chrIV_200220_C_T_13813	chrIV_240297_A_G_14075	chrIV_230130_T_A	chrIV_200220_C_T	chrIV_240297_A_G	-0.171551	0.0427658	chrIV	1.42326e-07	chrIV_208750_A_G chrIV_212303_C_T chrIV_245199_T_C chrIV_250369_A_G	3001	TRUE	chrIV	204971	252688	47718	*	FALSE	0.0259951	chrIV_230130_T_A	Formamide;2%;2	0.0001	0.000100005	31.9112	chrIV_221875_T_A_9858	chrIV_221162_G_A_9855	chrIV_227632_C_A_9899	chrIV_221875_T_A	chrIV_221162_G_A
Congo_Red;75ug/mL;3	YNL139C	THO2	chrXIV	360924	365874	4951	-	0.497293	YJM145x	decrease	0.195801	0.153492	chrXIV_359013_A_T				0.0001	0.000100005	16.5477	chrXIV_359088_C_G_42717	chrXIV_355610_C_T_42674	chrXIV_366467_C_T_42761	chrXIV_359088_C_G	chrXIV_355610_C_T	chrXIV_366467_C_T	-0.211019	0.042008	chrXIV	5.23508e-18	chrXIV_353690_C_A chrXIV_356454_T_C chrXIV_361812_G_C chrXIV_363054_T_C	377	TRUE	chrXIV	351850	367094	15245	*	FALSE	0.195271	chrXIV_359088_C_G	Congo_Red;75ug/mL;3	0.0001	0.000100005	23.3454	chrXIV_364317_A_T_54858	chrXIV_360630_T_C_54830	chrXIV_370196_T_G_54899	chrXIV_364317_A_T	chrXIV_360630_T_C
EGTA;5mM;3	YDR180W	SCC2	chrIV	821059	825842	4784	+	0.496865	YJM145x	decrease	0.196528	0.0780284	chrIV_815018_AAC_A				0.0001	0.000100005	10.7985	chrIV_815013_T_C_10015	chrIV_810443_A_C_9994	chrIV_831711_G_A_10100	chrIV_815013_T_C	chrIV_810443_A_C	chrIV_831711_G_A	-0.155285	0.0291478	chrIV	2.1031e-11	chrIV_806752_A_G chrIV_812478_A_G chrIV_828748_T_C chrIV_830390_TG_T	377	TRUE	chrIV	802553	834467	31915	*	FALSE	0.109109	chrIV_815013_T_C	EGTA;5mM;3	0.0001	0.000100005	37.2698	chrIV_821822_A_G_13160	chrIV_815537_T_C_13114	chrIV_825304_T_C_13168	chrIV_821822_A_G	chrIV_815537_T_C
Xylose;;1	YMR164C	MSS11	chrXIII	586831	589794	2964	-	0.495771	YJM981x	increase	0.197253	0.111869	chrXIII_591086_C_T				0.0001	0.000100005	7.95407	chrXIII_587638_CTATTATTATTAT_C,CTATTATTAT,CTAT,*_28123	chrXIII_576199_C_T_28102	chrXIII_593656_A_G_28179	chrXIII_587638_CTATTATTATTAT_C,CTATTATTAT,CTAT,*	chrXIII_576199_C_T	chrXIII_593656_A_G	0.191067	0.0383872	chrXIII	7.95074e-10	chrXIII_578449_C_T chrXIII_578476_C_T chrXIII_593269_G_A chrXIII_598603_A_G	3003	TRUE	chrXIII	578449	593601	15153	*	FALSE	0.0306667	chrXIII_587638_CTATTATTATTAT_C,CTATTATTAT,CTAT,*	Xylose;;1	0.0001	0.000100005	7.64556	chrXIII_591086_C_T_59248	chrXIII_559048_TAA_T,TA_59053	chrXIII_620313_A_T_59411	chrXIII_591086_C_T	chrXIII_559048_TAA_T,TA
Methotrexate;0.4mM;2	YHL048W	COS8	chrVIII	6099	7947	1849	+	0.495736	YJM981x	increase	0.197976	0.0949483	chrVIII_14636_A_G				0.003	0.00133501	9.21737	chrVIII_14579_C_T_33286	chrVIII_14262_T_A_33279	chrVIII_14636_A_G_33288	chrVIII_14579_C_T	chrVIII_14262_T_A	chrVIII_14636_A_G	0.229916	0.0347586	chrVIII	1.07218e-13	chrVIII_13957_G_T chrVIII_14262_T_A chrVIII_20806_G_A chrVIII_22813_T_C	3004	TRUE	chrVIII	4057	23120	19064	*	FALSE	0.13459	chrVIII_14579_C_T	Methotrexate;0.4mM;2	0.0001	0.000100005	50.2682	chrVIII_988_C_T_13559	chrVIII_988_C_T_13559	chrVIII_16495_G_C_13696	chrVIII_988_C_T	chrVIII_988_C_T
Xylose;;1	YIL117C	PRM5	chrIX	140530	142247	1718	-	0.494624	YJM454a	decrease	0.198697	0.129032	chrIX_140853_G_A				0.0001	0.000100005	18.4982	chrIX_145407_C_T_35940	chrIX_136028_C_T_35845	chrIX_147317_C_T_35949	chrIX_145407_C_T	chrIX_136028_C_T	chrIX_147317_C_T	0.284232	0.0654361	chrIX	3.65298e-20	chrIX_138693_T_C chrIX_141141_C_T chrIX_151961_G_A chrIX_156008_A_G	3008	TRUE	chrIX	140226	156752	16527	*	FALSE	0.0948661	chrIX_145407_C_T	Xylose;;1	0.0001	0.000100005	21.8233	chrIX_134734_A_G_26314	chrIX_127686_T_A_26271	chrIX_137343_G_T_26332	chrIX_134734_A_G	chrIX_127686_T_A
Mannose;;1	YIR020C		chrIX	393965	394736	772	-	0.493981	YPS1009x	decrease	0.199417	0.144674	chrIX_394651_C_T				0.0001	0.000100005	20.6554	chrIX_393247_C_T_37563	chrIX_387891_A_G_37495	chrIX_397249_A_G_37684	chrIX_393247_C_T	chrIX_387891_A_G	chrIX_397249_A_G	-0.237635	0.0714788	chrIX	4.17738e-22	chrIX_385964_T_G chrIX_387314_T_C chrIX_395745_A_C chrIX_396377_G_C	3008	TRUE	chrIX	387779	397464	9686	*	FALSE	0.0796414	chrIX_393247_C_T	Mannose;;1	0.0001	0.000100005	79.6998	chrIX_394651_C_T_43701	chrIX_394553_G_A_43698	chrIX_395745_A_C_43728	chrIX_394651_C_T	chrIX_394553_G_A
[truncated: 16 more columns]

## Sheet: GO_Biological_Process
GO.ID	Term	Annotated	Significant	Expected	P-value	fdr	Genes	GenesSystematic
GO:0006171	cAMP biosynthetic process	6	5	0.19	1.8e-07	0.00020418	IRA1,BCY1,CYR1,IRA2,RAS1	YBR140C,YIL033C,YJL005W,YOL081W,YOR101W
GO:0009190	cyclic nucleotide biosynthetic process	6	5	0.19	1.8e-07	0.00020418	IRA1,BCY1,CYR1,IRA2,RAS1	YBR140C,YIL033C,YJL005W,YOL081W,YOR101W
GO:0052652	cyclic purine nucleotide metabolic process	6	5	0.19	1.8e-07	0.00020418	IRA1,BCY1,CYR1,IRA2,RAS1	YBR140C,YIL033C,YJL005W,YOL081W,YOR101W
GO:0046058	cAMP metabolic process	7	5	0.22	6.1e-07	0.000518957	IRA1,BCY1,CYR1,IRA2,RAS1	YBR140C,YIL033C,YJL005W,YOL081W,YOR101W
GO:0009187	cyclic nucleotide metabolic process	8	5	0.25	1.6e-06	0.000964183	IRA1,BCY1,CYR1,IRA2,RAS1	YBR140C,YIL033C,YJL005W,YOL081W,YOR101W
GO:0030001	metal ion transport	83	13	2.64	1.7e-06	0.000964183	RIM2,PCA1,VCX1,ENA5,ENA1,AFT1,PMR1,FRE2,FRE1,PHO84,ALR1,FRE7,COT1	YBR192W,YBR295W,YDL128W,YDR038C,YDR040C,YGL071W,YGL167C,YKL220C,YLR214W,YML123C,YOL130W,YOL152W,YOR316C
GO:0030799	regulation of cyclic nucleotide metabolic process	5	4	0.16	4.8e-06	0.00148495	IRA1,BCY1,IRA2,RAS1	YBR140C,YIL033C,YOL081W,YOR101W
GO:0030802	regulation of cyclic nucleotide biosynthetic process	5	4	0.16	4.8e-06	0.00148495	IRA1,BCY1,IRA2,RAS1	YBR140C,YIL033C,YOL081W,YOR101W
GO:0030814	regulation of cAMP metabolic process	5	4	0.16	4.8e-06	0.00148495	IRA1,BCY1,IRA2,RAS1	YBR140C,YIL033C,YOL081W,YOR101W
GO:0030817	regulation of cAMP biosynthetic process	5	4	0.16	4.8e-06	0.00148495	IRA1,BCY1,IRA2,RAS1	YBR140C,YIL033C,YOL081W,YOR101W
GO:1900371	regulation of purine nucleotide biosynthetic process	5	4	0.16	4.8e-06	0.00148495	IRA1,BCY1,IRA2,RAS1	YBR140C,YIL033C,YOL081W,YOR101W
GO:0030808	regulation of nucleotide biosynthetic process	6	4	0.19	1.4e-05	0.00397017	IRA1,BCY1,IRA2,RAS1	YBR140C,YIL033C,YOL081W,YOR101W
GO:0000041	transition metal ion transport	49	9	1.56	1.9e-05	0.00453733	PCA1,VCX1,AFT1,PMR1,FRE2,FRE1,PHO84,FRE7,COT1	YBR295W,YDL128W,YGL071W,YGL167C,YKL220C,YLR214W,YML123C,YOL152W,YOR316C
GO:0009891	positive regulation of biosynthetic process	380	28	12.06	2e-05	0.00453733	PDR3,GAL3,LYS14,PHO4,PDR1,AFT1,GTS1,RIM101,BCY1,RPI1,RGT1,NUP120,TUB4,CDC123,HAP1,MOT3,MSS11,PAH1,NAM9,YAP7,HAL9,CTR9,ETT1,RAS1,SFL1,YRR1,PIP2,MED1	YBL005W,YDR009W,YDR034C,YFR034C,YGL013C,YGL071W,YGL181W,YHL027W,YIL033C,YIL119C,YKL038W,YKL057C,YLR212C,YLR215C,YLR256W,YMR070W,YMR164C,YMR165C,YNL137C,YOL028C,YOL089C,YOL145C,YOR051C,YOR101W,YOR140W,YOR162C,YOR363C,YPR070W
GO:0031328	positive regulation of cellular biosynthetic process	380	28	12.06	2e-05	0.00453733	PDR3,GAL3,LYS14,PHO4,PDR1,AFT1,GTS1,RIM101,BCY1,RPI1,RGT1,NUP120,TUB4,CDC123,HAP1,MOT3,MSS11,PAH1,NAM9,YAP7,HAL9,CTR9,ETT1,RAS1,SFL1,YRR1,PIP2,MED1	YBL005W,YDR009W,YDR034C,YFR034C,YGL013C,YGL071W,YGL181W,YHL027W,YIL033C,YIL119C,YKL038W,YKL057C,YLR212C,YLR215C,YLR256W,YMR070W,YMR164C,YMR165C,YNL137C,YOL028C,YOL089C,YOL145C,YOR051C,YOR101W,YOR140W,YOR162C,YOR363C,YPR070W
GO:0051173	positive regulation of nitrogen compound metabolic process	393	28	12.48	3.8e-05	0.00760671	PDR3,GAL3,LYS14,PHO4,PDR1,AFT1,GTS1,RIM101,BCY1,RPI1,RGT1,NUP120,TUB4,CDC123,HAP1,MOT3,MSS11,PAH1,NAM9,YAP7,HAL9,CTR9,ETT1,RAS1,SFL1,YRR1,PIP2,MED1	YBL005W,YDR009W,YDR034C,YFR034C,YGL013C,YGL071W,YGL181W,YHL027W,YIL033C,YIL119C,YKL038W,YKL057C,YLR212C,YLR215C,YLR256W,YMR070W,YMR164C,YMR165C,YNL137C,YOL028C,YOL089C,YOL145C,YOR051C,YOR101W,YOR140W,YOR162C,YOR363C,YPR070W
GO:0045944	positive regulation of transcription from RNA polymerase II promoter	270	22	8.57	3.8e-05	0.00760671	PDR3,GAL3,LYS14,PHO4,PDR1,AFT1,GTS1,RIM101,RPI1,RGT1,NUP120,HAP1,MOT3,MSS11,PAH1,YAP7,HAL9,ETT1,SFL1,YRR1,PIP2,MED1	YBL005W,YDR009W,YDR034C,YFR034C,YGL013C,YGL071W,YGL181W,YHL027W,YIL119C,YKL038W,YKL057C,YLR256W,YMR070W,YMR164C,YMR165C,YOL028C,YOL089C,YOR051C,YOR140W,YOR162C,YOR363C,YPR070W
GO:0010628	positive regulation of gene expression	361	26	11.46	6.2e-05	0.0117214	PDR3,GAL3,LYS14,PHO4,PDR1,AFT1,GTS1,RIM101,RPI1,RGT1,NUP120,TUB4,CDC123,HAP1,MOT3,MSS11,PAH1,NAM9,YAP7,HAL9,CTR9,ETT1,SFL1,YRR1,PIP2,MED1	YBL005W,YDR009W,YDR034C,YFR034C,YGL013C,YGL071W,YGL181W,YHL027W,YIL119C,YKL038W,YKL057C,YLR212C,YLR215C,YLR256W,YMR070W,YMR164C,YMR165C,YNL137C,YOL028C,YOL089C,YOL145C,YOR051C,YOR140W,YOR162C,YOR363C,YPR070W
GO:0010557	positive regulation of macromolecule biosynthetic process	364	26	11.56	7.1e-05	0.0127165	PDR3,GAL3,LYS14,PHO4,PDR1,AFT1,GTS1,RIM101,RPI1,RGT1,NUP120,TUB4,CDC123,HAP1,MOT3,MSS11,PAH1,NAM9,YAP7,HAL9,CTR9,ETT1,SFL1,YRR1,PIP2,MED1	YBL005W,YDR009W,YDR034C,YFR034C,YGL013C,YGL071W,YGL181W,YHL027W,YIL119C,YKL038W,YKL057C,YLR212C,YLR215C,YLR256W,YMR070W,YMR164C,YMR165C,YNL137C,YOL028C,YOL089C,YOL145C,YOR051C,YOR140W,YOR162C,YOR363C,YPR070W
GO:0045935	positive regulation of nucleobase-containing compound metabolic process	350	25	11.11	9.9e-05	0.0168449	PDR3,GAL3,LYS14,PHO4,PDR1,AFT1,GTS1,RIM101,BCY1,RPI1,RGT1,NUP120,HAP1,MOT3,MSS11,PAH1,YAP7,HAL9,CTR9,ETT1,RAS1,SFL1,YRR1,PIP2,MED1	YBL005W,YDR009W,YDR034C,YFR034C,YGL013C,YGL071W,YGL181W,YHL027W,YIL033C,YIL119C,YKL038W,YKL057C,YLR256W,YMR070W,YMR164C,YMR165C,YOL028C,YOL089C,YOL145C,YOR051C,YOR101W,YOR140W,YOR162C,YOR363C,YPR070W
GO:0031279	regulation of cyclase activity	4	3	0.13	0.00012	0.0177548	IRA1,BCY1,RAS1	YBR140C,YIL033C,YOR101W
GO:0045761	regulation of adenylate cyclase activity	4	3	0.13	0.00012	0.0177548	IRA1,BCY1,RAS1	YBR140C,YIL033C,YOR101W
GO:0051339	regulation of lyase activity	4	3	0.13	0.00012	0.0177548	IRA1,BCY1,RAS1	YBR140C,YIL033C,YOR101W
GO:0055085	transmembrane transport	399	27	12.67	0.00013	0.0182304	FLC2,FUR4,RIM2,PCA1,PHO89,VCX1,ENA5,ENA1,PEX5,GNP1,PMR1,MAL11,MUP3,ERC1,QDR1,YIL166C,PEX1,GAL2,PHO84,SAL1,MEP2,ALR1,AUS1,NRT1,PDR5,COT1,SSU1	YAL053W,YBR021W,YBR192W,YBR295W,YBR296C,YDL128W,YDR038C,YDR040C,YDR244W,YDR508C,YGL167C,YGR289C,YHL036W,YHR032W,YIL120W,YIL166C,YKL197C,YLR081W,YML123C,YNL083W,YNL142W,YOL130W,YOR011W,YOR071C,YOR153W,YOR316C,YPL092W
GO:0045893	positive regulation of transcription, DNA-templated	316	23	10.03	0.00015	0.0182304	PDR3,GAL3,LYS14,PHO4,PDR1,AFT1,GTS1,RIM101,RPI1,RGT1,NUP120,HAP1,MOT3,MSS11,PAH1,YAP7,HAL9,CTR9,ETT1,SFL1,YRR1,PIP2,MED1	YBL005W,YDR009W,YDR034C,YFR034C,YGL013C,YGL071W,YGL181W,YHL027W,YIL119C,YKL038W,YKL057C,YLR256W,YMR070W,YMR164C,YMR165C,YOL028C,YOL089C,YOL145C,YOR051C,YOR140W,YOR162C,YOR363C,YPR070W
GO:1902680	positive regulation of RNA biosynthetic process	316	23	10.03	0.00015	0.0182304	PDR3,GAL3,LYS14,PHO4,PDR1,AFT1,GTS1,RIM101,RPI1,RGT1,NUP120,HAP1,MOT3,MSS11,PAH1,YAP7,HAL9,CTR9,ETT1,SFL1,YRR1,PIP2,MED1	YBL005W,YDR009W,YDR034C,YFR034C,YGL013C,YGL071W,YGL181W,YHL027W,YIL119C,YKL038W,YKL057C,YLR256W,YMR070W,YMR164C,YMR165C,YOL028C,YOL089C,YOL145C,YOR051C,YOR140W,YOR162C,YOR363C,YPR070W
GO:1903508	positive regulation of nucleic acid-templated transcription	316	23	10.03	0.00015	0.0182304	PDR3,GAL3,LYS14,PHO4,PDR1,AFT1,GTS1,RIM101,RPI1,RGT1,NUP120,HAP1,MOT3,MSS11,PAH1,YAP7,HAL9,CTR9,ETT1,SFL1,YRR1,PIP2,MED1	YBL005W,YDR009W,YDR034C,YFR034C,YGL013C,YGL071W,YGL181W,YHL027W,YIL119C,YKL038W,YKL057C,YLR256W,YMR070W,YMR164C,YMR165C,YOL028C,YOL089C,YOL145C,YOR051C,YOR140W,YOR162C,YOR363C,YPR070W
GO:0048522	positive regulation of cellular process	585	35	18.57	0.00015	0.0182304	PDR3,RPP1A,CDC53,GAL3,LYS14,PHO4,PDR1,AFT1,GTS1,CYS4,RIM101,BCY1,RHO3,RPI1,RGT1,NUP120,TOR2,ACE2,TUB4,CDC123,HAP1,ZDS2,MOT3,MSS11,PAH1,NAM9,YAP7,HAL9,CTR9,ETT1,RAS1,SFL1,YRR1,PIP2,MED1	YBL005W,YDL081C,YDL132W,YDR009W,YDR034C,YFR034C,YGL013C,YGL071W,YGL181W,YGR155W,YHL027W,YIL033C,YIL118W,YIL119C,YKL038W,YKL057C,YKL203C,YLR131C,YLR212C,YLR215C,YLR256W,YML109W,YMR070W,YMR164C,YMR165C,YNL137C,YOL028C,YOL089C,YOL145C,YOR051C,YOR101W,YOR140W,YOR162C,YOR363C,YPR070W
GO:0007265	Ras protein signal transduction	64	9	2.03	0.00016	0.0187752	IRA1,ROM1,BCY1,RPI1,CYR1,TOR2,SRV2,AVO1,IRA2	YBR140C,YGR070W,YIL033C,YIL119C,YJL005W,YKL203C,YNL138W,YOL078W,YOL081W
GO:0007264	small GTPase mediated signal transduction	94	11	2.98	0.00017	0.0192837	IRA1,ROM1,BCY1,RHO3,RPI1,CYR1,TOR2,SRV2,AVO1,IRA2,RAS1	YBR140C,YGR070W,YIL033C,YIL118W,YIL119C,YJL005W,YKL203C,YNL138W,YOL078W,YOL081W,YOR101W
GO:0048518	positive regulation of biological process	597	35	18.95	0.00022	0.0233956	PDR3,RPP1A,CDC53,GAL3,LYS14,PHO4,PDR1,AFT1,GTS1,CYS4,RIM101,BCY1,RHO3,RPI1,RGT1,NUP120,TOR2,ACE2,TUB4,CDC123,HAP1,ZDS2,MOT3,MSS11,PAH1,NAM9,YAP7,HAL9,CTR9,ETT1,RAS1,SFL1,YRR1,PIP2,MED1	YBL005W,YDL081C,YDL132W,YDR009W,YDR034C,YFR034C,YGL013C,YGL071W,YGL181W,YGR155W,YHL027W,YIL033C,YIL118W,YIL119C,YKL038W,YKL057C,YKL203C,YLR131C,YLR212C,YLR215C,YLR256W,YML109W,YMR070W,YMR164C,YMR165C,YNL137C,YOL028C,YOL089C,YOL145C,YOR051C,YOR101W,YOR140W,YOR162C,YOR363C,YPR070W
GO:0051254	positive regulation of RNA metabolic process	325	23	10.32	0.00022	0.0233956	PDR3,GAL3,LYS14,PHO4,PDR1,AFT1,GTS1,RIM101,RPI1,RGT1,NUP120,HAP1,MOT3,MSS11,PAH1,YAP7,HAL9,CTR9,ETT1,SFL1,YRR1,PIP2,MED1	YBL005W,YDR009W,YDR034C,YFR034C,YGL013C,YGL071W,YGL181W,YHL027W,YIL119C,YKL038W,YKL057C,YLR256W,YMR070W,YMR164C,YMR165C,YOL028C,YOL089C,YOL145C,YOR051C,YOR140W,YOR162C,YOR363C,YPR070W
GO:0050896	response to stimulus	1216	59	38.61	0.00024	0.0240212	FLC2,PDR3,RAD16,IRA1,PCA1,DCC1,GPR1,GAL3,ENA1,SCC2,PHO4,PDR1,AFT1,MSB2,ROM1,RIM101,ERC1,BCY1,RHO3,RPI1,QDR1,MET18,CSS1,CYR1,HAL5,TOR1,NUP120,APN1,MNN4,TOR2,UBA1,LMO1,PSR1,MNL2,HAP1,MOT3,ECM5,MLF3,MKT1,SRV2,THO2,MEP2,AVO1,IRA2,ATG19,HAL9,PAP2,CTR9,AUS1,WHI2,ETT1,RAS1,RGA1,ARP8,PDR5,YRR1,COT1,PIP2,GLR1	YAL053W,YBL005W,YBR114W,YBR140C,YBR295W,YCL016C,YDL035C,YDR009W,YDR040C,YDR180W,YFR034C,YGL013C,YGL071W,YGR014W,YGR070W,YHL027W,YHR032W,YIL033C,YIL118W,YIL119C,YIL120W,YIL128W,YIL169C,YJL005W,YJL165C,YJR066W,YKL057C,YKL114C,YKL201C,YKL203C,YKL210W,YLL007C,YLL010C,YLR057W,YLR256W,YMR070W,YMR176W,YNL074C,YNL085W,YNL138W,YNL139C,YNL142W,YOL078W,YOL081W,YOL082W,YOL089C,YOL115W,YOL145C,YOR011W,YOR043W…
GO:0031325	positive regulation of cellular metabolic process	483	30	15.33	0.00024	0.0240212	PDR3,RPP1A,CDC53,GAL3,LYS14,PHO4,PDR1,AFT1,GTS1,RIM101,BCY1,RPI1,RGT1,NUP120,TUB4,CDC123,HAP1,MOT3,MSS11,PAH1,NAM9,YAP7,HAL9,CTR9,ETT1,RAS1,SFL1,YRR1,PIP2,MED1	YBL005W,YDL081C,YDL132W,YDR009W,YDR034C,YFR034C,YGL013C,YGL071W,YGL181W,YHL027W,YIL033C,YIL119C,YKL038W,YKL057C,YLR212C,YLR215C,YLR256W,YMR070W,YMR164C,YMR165C,YNL137C,YOL028C,YOL089C,YOL145C,YOR051C,YOR101W,YOR140W,YOR162C,YOR363C,YPR070W
GO:0006812	cation transport	168	15	5.33	0.00026	0.0252794	RIM2,PCA1,VCX1,ENA5,ENA1,AFT1,PMR1,MUP3,FRE2,FRE1,PHO84,MEP2,ALR1,FRE7,COT1	YBR192W,YBR295W,YDL128W,YDR038C,YDR040C,YGL071W,YGL167C,YHL036W,YKL220C,YLR214W,YML123C,YNL142W,YOL130W,YOL152W,YOR316C
GO:0009893	positive regulation of metabolic process	486	30	15.43	0.00027	0.0255225	PDR3,RPP1A,CDC53,GAL3,LYS14,PHO4,PDR1,AFT1,GTS1,RIM101,BCY1,RPI1,RGT1,NUP120,TUB4,CDC123,HAP1,MOT3,MSS11,PAH1,NAM9,YAP7,HAL9,CTR9,ETT1,RAS1,SFL1,YRR1,PIP2,MED1	YBL005W,YDL081C,YDL132W,YDR009W,YDR034C,YFR034C,YGL013C,YGL071W,YGL181W,YHL027W,YIL033C,YIL119C,YKL038W,YKL057C,YLR212C,YLR215C,YLR256W,YMR070W,YMR164C,YMR165C,YNL137C,YOL028C,YOL089C,YOL145C,YOR051C,YOR101W,YOR140W,YOR162C,YOR363C,YPR070W
GO:0046578	regulation of Ras protein signal transduction	30	6	0.95	0.0003	0.0275919	IRA1,ROM1,BCY1,TOR2,AVO1,IRA2	YBR140C,YGR070W,YIL033C,YKL203C,YOL078W,YOL081W
GO:0042493	response to drug	43	7	1.37	0.00036	0.0322389	PDR3,PDR1,ERC1,QDR1,MLF3,AUS1,PDR5	YBL005W,YGL013C,YHR032W,YIL120W,YNL074C,YOR011W,YOR153W
GO:0010604	positive regulation of macromolecule metabolic process	451	28	14.32	0.00041	0.0348402	PDR3,RPP1A,CDC53,GAL3,LYS14,PHO4,PDR1,AFT1,GTS1,RIM101,RPI1,RGT1,NUP120,TUB4,CDC123,HAP1,MOT3,MSS11,PAH1,NAM9,YAP7,HAL9,CTR9,ETT1,SFL1,YRR1,PIP2,MED1	YBL005W,YDL081C,YDL132W,YDR009W,YDR034C,YFR034C,YGL013C,YGL071W,YGL181W,YHL027W,YIL119C,YKL038W,YKL057C,YLR212C,YLR215C,YLR256W,YMR070W,YMR164C,YMR165C,YNL137C,YOL028C,YOL089C,YOL145C,YOR051C,YOR140W,YOR162C,YOR363C,YPR070W
GO:0016049	cell growth	88	10	2.79	0.00043	0.0348402	GPR1,FLO11,TOR1,KTI12,TOR2,MSS11,MEP2,AVO1,RGA1,SFL1	YDL035C,YIR019C,YJR066W,YKL110C,YKL203C,YMR164C,YNL142W,YOL078W,YOR127W,YOR140W
GO:0051056	regulation of small GTPase mediated signal transduction	32	6	1.02	0.00043	0.0348402	IRA1,ROM1,BCY1,TOR2,AVO1,IRA2	YBR140C,YGR070W,YIL033C,YKL203C,YOL078W,YOL081W
GO:0070838	divalent metal ion transport	32	6	1.02	0.00043	0.0348402	RIM2,PCA1,VCX1,PMR1,ALR1,COT1	YBR192W,YBR295W,YDL128W,YGL167C,YOL130W,YOR316C
GO:0072511	divalent inorganic cation transport	33	6	1.05	0.00051	0.0403612	RIM2,PCA1,VCX1,PMR1,ALR1,COT1	YBR192W,YBR295W,YDL128W,YGL167C,YOL130W,YOR316C
GO:0051716	cellular response to stimulus	1063	52	33.75	0.00055	0.0423484	FLC2,PDR3,RAD16,IRA1,DCC1,GPR1,GAL3,ENA1,SCC2,PHO4,PDR1,AFT1,MSB2,ROM1,RIM101,BCY1,RHO3,RPI1,MET18,CSS1,CYR1,HAL5,TOR1,NUP120,APN1,MNN4,TOR2,UBA1,LMO1,PSR1,MNL2,HAP1,MOT3,ECM5,MKT1,SRV2,THO2,MEP2,AVO1,IRA2,ATG19,PAP2,CTR9,AUS1,ETT1,RAS1,RGA1,ARP8,PDR5,YRR1,PIP2,GLR1	YAL053W,YBL005W,YBR114W,YBR140C,YCL016C,YDL035C,YDR009W,YDR040C,YDR180W,YFR034C,YGL013C,YGL071W,YGR014W,YGR070W,YHL027W,YIL033C,YIL118W,YIL119C,YIL128W,YIL169C,YJL005W,YJL165C,YJR066W,YKL057C,YKL114C,YKL201C,YKL203C,YKL210W,YLL007C,YLL010C,YLR057W,YLR256W,YMR070W,YMR176W,YNL085W,YNL138W,YNL139C,YNL142W,YOL078W,YOL081W,YOL082W,YOL115W,YOL145C,YOR011W,YOR051C,YOR101W,YOR127W,YOR141C,YOR153W,YOR162C…
GO:1900542	regulation of purine nucleotide metabolic process	13	4	0.41	0.00056	0.0423484	IRA1,BCY1,IRA2,RAS1	YBR140C,YIL033C,YOL081W,YOR101W
GO:0046580	negative regulation of Ras protein signal transduction	14	4	0.44	0.00077	0.0569633	IRA1,BCY1,AVO1,IRA2	YBR140C,YIL033C,YOL078W,YOL081W
GO:0035690	cellular response to drug	15	4	0.48	0.00102	0.0738523	PDR3,PDR1,AUS1,PDR5	YBL005W,YGL013C,YOR011W,YOR153W
GO:0006811	ion transport	346	22	10.99	0.0013	0.0921646	FLC2,RIM2,PCA1,PHO89,VCX1,ENA5,ENA1,GNP1,AFT1,PMR1,MUP3,YIL166C,FRE2,FRE1,PHO84,SAL1,MEP2,PHM7,ALR1,FRE7,COT1,SSU1	YAL053W,YBR192W,YBR295W,YBR296C,YDL128W,YDR038C,YDR040C,YDR508C,YGL071W,YGL167C,YHL036W,YIL166C,YKL220C,YLR214W,YML123C,YNL083W,YNL142W,YOL084W,YOL130W,YOL152W,YOR316C,YPL092W
GO:0051058	negative regulation of small GTPase mediated signal transduction	16	4	0.51	0.00133	0.0923671	IRA1,BCY1,AVO1,IRA2	YBR140C,YIL033C,YOL078W,YOL081W
GO:0000128	flocculation	8	3	0.25	0.00157	0.0971402	FLO11,MSS11,SFL1	YIR019C,YMR164C,YOR140W
GO:0006828	manganese ion transport	8	3	0.25	0.00157	0.0971402	VCX1,PMR1,PHO84	YDL128W,YGL167C,YML123C
GO:0036293	response to decreased oxygen levels	8	3	0.25	0.00157	0.0971402	RIM101,HAP1,ETT1	YHL027W,YLR256W,YOR051C
GO:0036294	cellular response to decreased oxygen levels	8	3	0.25	0.00157	0.0971402	RIM101,HAP1,ETT1	YHL027W,YLR256W,YOR051C
GO:0070482	response to oxygen levels	8	3	0.25	0.00157	0.0971402	RIM101,HAP1,ETT1	YHL027W,YLR256W,YOR051C
GO:0071453	cellular response to oxygen levels	8	3	0.25	0.00157	0.0971402	RIM101,HAP1,ETT1	YHL027W,YLR256W,YOR051C
GO:0006357	regulation of transcription from RNA polymerase II promoter	422	25	13.4	0.00166	0.100875	PDR3,GAL3,LYS14,PHO4,PDR1,AFT1,GTS1,RIM101,RPI1,RGT1,NUP120,KTI12,HAP1,MOT3,MSS11,PAH1,YAP7,HAL9,CTR9,ETT1,SFL1,YRR1,PIP2,MOT1,MED1	YBL005W,YDR009W,YDR034C,YFR034C,YGL013C,YGL071W,YGL181W,YHL027W,YIL119C,YKL038W,YKL057C,YKL110C,YLR256W,YMR070W,YMR164C,YMR165C,YOL028C,YOL089C,YOL145C,YOR051C,YOR140W,YOR162C,YOR363C,YPL082C,YPR070W
GO:0006140	regulation of nucleotide metabolic process	17	4	0.54	0.00169	0.100896	IRA1,BCY1,IRA2,RAS1	YBR140C,YIL033C,YOL081W,YOR101W
GO:0055065	metal ion homeostasis	107	10	3.4	0.00199	0.116758	FLC2,PCA1,VCX1,PMR1,NFU1,FRE2,FRE1,MAM3,FRE7,COT1	YAL053W,YBR295W,YDL128W,YGL167C,YKL040C,YKL220C,YLR214W,YOL060C,YOL152W,YOR316C
GO:0007154	cell communication	453	26	14.38	0.0021	0.118268	IRA1,GPR1,GAL3,ENA1,PHO4,AFT1,MSB2,ROM1,BCY1,RHO3,RPI1,CSS1,CYR1,HAL5,TOR1,TOR2,LMO1,HAP1,SRV2,MEP2,AVO1,IRA2,ETT1,RAS1,RGA1,PIP2	YBR140C,YDL035C,YDR009W,YDR040C,YFR034C,YGL071W,YGR014W,YGR070W,YIL033C,YIL118W,YIL119C,YIL169C,YJL005W,YJL165C,YJR066W,YKL203C,YLL007C,YLR256W,YNL138W,YNL142W,YOL078W,YOL081W,YOR051C,YOR101W,YOR127W,YOR363C
GO:0051179	localization	1489	65	47.27	0.00211	0.118268	FLC2,SWH1,FUR4,RAD16,RIM2,PCA1,PHO89,USO1,VCX1,GAL3,ENA5,ENA1,SCC2,PEX5,TRS23,TOM1,GNP1,SEC3,AFT1,PMR1,GTS1,MSP1,MAL11,COS6,MUP3,COS8,ERC1,BCY1,RHO3,QDR1,YIL166C,NOP9,HAL5,APL1,VPS70,RGT1,NFU1,NUP120,PEX1,TOR2,FRE2,PTR2,GAL2,FRE1,HAP1,ZDS2,PHO84,SAL1,END3,THO2,MEP2,ATG19,PHM7,RPS19A,ALR1,FRE7,AUS1,WHI2,NRT1,RAS1,INP53,PDR5,COT1,SSU1,RTT10	YAL053W,YAR042W,YBR021W,YBR114W,YBR192W,YBR295W,YBR296C,YDL058W,YDL128W,YDR009W,YDR038C,YDR040C,YDR180W,YDR244W,YDR246W,YDR457W,YDR508C,YER008C,YGL071W,YGL167C,YGL181W,YGR028W,YGR289C,YGR295C,YHL036W,YHL048W,YHR032W,YIL033C,YIL118W,YIL120W,YIL166C,YJL010C,YJL165C,YJR005W,YJR126C,YKL038W,YKL040C,YKL057C,YKL197C,YKL203C,YKL220C,YKR093W,YLR081W,YLR214W,YLR256W,YML109W,YML123C,YNL083W,YNL084C,YNL139C…
GO:0006855	drug transmembrane transport	18	4	0.57	0.00212	0.118268	ERC1,QDR1,AUS1,PDR5	YHR032W,YIL120W,YOR011W,YOR153W
GO:0019219	regulation of nucleobase-containing compound metabolic process	808	40	25.65	0.00229	0.125691	PDR3,IRA1,DCC1,GAL3,LYS14,TOM1,PHO4,PDR1,AFT1,GTS1,RIM101,BCY1,RPI1,ASG1,TOR1,RGT1,NUP120,KTI12,TOR2,ACE2,HAP1,ZDS2,MOT3,MSS11,PAH1,THO2,IPI3,YAP7,IRA2,HAL9,PAP2,CTR9,ETT1,RAS1,SFL1,ARP8,YRR1,PIP2,MOT1,MED1	YBL005W,YBR140C,YCL016C,YDR009W,YDR034C,YDR457W,YFR034C,YGL013C,YGL071W,YGL181W,YHL027W,YIL033C,YIL119C,YIL130W,YJR066W,YKL038W,YKL057C,YKL110C,YKL203C,YLR131C,YLR256W,YML109W,YMR070W,YMR164C,YMR165C,YNL139C,YNL182C,YOL028C,YOL081W,YOL089C,YOL115W,YOL145C,YOR051C,YOR101W,YOR140W,YOR141C,YOR162C,YOR363C,YPL082C,YPR070W
GO:0055080	cation homeostasis	148	12	4.7	0.00247	0.128703	FLC2,PCA1,VCX1,PMR1,HAL5,NFU1,FRE2,FRE1,MAM3,FRE7,PDR5,COT1	YAL053W,YBR295W,YDL128W,YGL167C,YJL165C,YKL040C,YKL220C,YLR214W,YOL060C,YOL152W,YOR153W,YOR316C
GO:0006826	iron ion transport	19	4	0.6	0.00262	0.128703	AFT1,FRE2,FRE1,FRE7	YGL071W,YKL220C,YLR214W,YOL152W
GO:0001558	regulation of cell growth	31	5	0.98	0.00265	0.128703	TOR1,TOR2,MSS11,AVO1,SFL1	YJR066W,YKL203C,YMR164C,YOL078W,YOR140W
GO:0030801	positive regulation of cyclic nucleotide metabolic process	3	2	0.1	0.00295	0.128703	BCY1,RAS1	YIL033C,YOR101W
GO:0030804	positive regulation of cyclic nucleotide biosynthetic process	3	2	0.1	0.00295	0.128703	BCY1,RAS1	YIL033C,YOR101W
GO:0030816	positive regulation of cAMP metabolic process	3	2	0.1	0.00295	0.128703	BCY1,RAS1	YIL033C,YOR101W
GO:0030819	positive regulation of cAMP biosynthetic process	3	2	0.1	0.00295	0.128703	BCY1,RAS1	YIL033C,YOR101W
GO:0031281	positive regulation of cyclase activity	3	2	0.1	0.00295	0.128703	BCY1,RAS1	YIL033C,YOR101W
GO:0045762	positive regulation of adenylate cyclase activity	3	2	0.1	0.00295	0.128703	BCY1,RAS1	YIL033C,YOR101W
GO:0051349	positive regulation of lyase activity	3	2	0.1	0.00295	0.128703	BCY1,RAS1	YIL033C,YOR101W
GO:0061418	regulation of transcription from RNA polymerase II promoter in response to hypoxia	3	2	0.1	0.00295	0.128703	HAP1,ETT1	YLR256W,YOR051C
GO:1900373	positive regulation of purine nucleotide biosynthetic process	3	2	0.1	0.00295	0.128703	BCY1,RAS1	YIL033C,YOR101W
GO:2001023	regulation of response to drug	3	2	0.1	0.00295	0.128703	PDR3,PDR1	YBL005W,YGL013C
GO:2001025	positive regulation of response to drug	3	2	0.1	0.00295	0.128703	PDR3,PDR1	YBL005W,YGL013C
GO:2001038	regulation of cellular response to drug	3	2	0.1	0.00295	0.128703	PDR3,PDR1	YBL005W,YGL013C
GO:2001040	positive regulation of cellular response to drug	3	2	0.1	0.00295	0.128703	PDR3,PDR1	YBL005W,YGL013C
GO:0040007	growth	175	13	5.56	0.00357	0.153781	GPR1,MSB2,TAO3,FLO11,TOR1,KTI12,TOR2,MSS11,MEP2,AVO1,WHI2,RGA1,SFL1	YDL035C,YGR014W,YIL129C,YIR019C,YJR066W,YKL110C,YKL203C,YMR164C,YNL142W,YOL078W,YOR043W,YOR127W,YOR140W
GO:0015893	drug transport	21	4	0.67	0.00385	0.163769	ERC1,QDR1,AUS1,PDR5	YHR032W,YIL120W,YOR011W,YOR153W
GO:0015677	copper ion import	11	3	0.35	0.0043	0.180653	FRE2,FRE1,FRE7	YKL220C,YLR214W,YOL152W
GO:0072522	purine-containing compound biosynthetic process	66	7	2.1	0.00465	0.192975	IRA1,BCY1,CYR1,AAH1,IRA2,RAS1,ADE2	YBR140C,YIL033C,YJL005W,YNL141W,YOL081W,YOR101W,YOR128C
GO:0009628	response to abiotic stimulus	183	13	5.81	0.00522	0.213427	FLC2,ENA1,MSB2,RIM101,NUP120,MNN4,PSR1,HAP1,MOT3,IRA2,HAL9,WHI2,ETT1	YAL053W,YDR040C,YGR014W,YHL027W,YKL057C,YKL201C,YLL010C,YLR256W,YMR070W,YOL081W,YOL089C,YOR043W,YOR051C
GO:0050801	ion homeostasis	163	12	5.18	0.00543	0.213427	FLC2,PCA1,VCX1,PMR1,HAL5,NFU1,FRE2,FRE1,MAM3,FRE7,PDR5,COT1	YAL053W,YBR295W,YDL128W,YGL167C,YJL165C,YKL040C,YKL220C,YLR214W,YOL060C,YOL152W,YOR153W,YOR316C
GO:0051234	establishment of localization	1346	58	42.73	0.00555	0.213427	FLC2,SWH1,FUR4,RIM2,PCA1,PHO89,USO1,VCX1,ENA5,ENA1,SCC2,PEX5,TRS23,TOM1,GNP1,SEC3,AFT1,PMR1,GTS1,MSP1,MAL11,COS6,MUP3,COS8,ERC1,RHO3,QDR1,YIL166C,NOP9,APL1,VPS70,RGT1,NUP120,PEX1,TOR2,FRE2,PTR2,GAL2,FRE1,HAP1,PHO84,SAL1,END3,THO2,MEP2,ATG19,PHM7,RPS19A,ALR1,FRE7,AUS1,WHI2,NRT1,INP53,PDR5,COT1,SSU1,RTT10	YAL053W,YAR042W,YBR021W,YBR192W,YBR295W,YBR296C,YDL058W,YDL128W,YDR038C,YDR040C,YDR180W,YDR244W,YDR246W,YDR457W,YDR508C,YER008C,YGL071W,YGL167C,YGL181W,YGR028W,YGR289C,YGR295C,YHL036W,YHL048W,YHR032W,YIL118W,YIL120W,YIL166C,YJL010C,YJR005W,YJR126C,YKL038W,YKL057C,YKL197C,YKL203C,YKL220C,YKR093W,YLR081W,YLR214W,YLR256W,YML123C,YNL083W,YNL084C,YNL139C,YNL142W,YOL082W,YOL084W,YOL121C,YOL130W,YOL152W…
GO:0030950	establishment or maintenance of actin cytoskeleton polarity	12	3	0.38	0.00561	0.213427	RHO3,TOR2,AVO1	YIL118W,YKL203C,YOL078W
GO:0030952	establishment or maintenance of cytoskeleton polarity	12	3	0.38	0.00561	0.213427	RHO3,TOR2,AVO1	YIL118W,YKL203C,YOL078W
GO:0098630	aggregation of unicellular organisms	12	3	0.38	0.00561	0.213427	FLO11,MSS11,SFL1	YIR019C,YMR164C,YOR140W
GO:0098743	cell aggregation	12	3	0.38	0.00561	0.213427	FLO11,MSS11,SFL1	YIR019C,YMR164C,YOR140W
GO:0030810	positive regulation of nucleotide biosynthetic process	4	2	0.13	0.00577	0.213427	BCY1,RAS1	YIL033C,YOR101W
GO:0071169	establishment of protein localization to chromatin	4	2	0.13	0.00577	0.213427	SCC2,HAP1	YDR180W,YLR256W
GO:0090527	actin filament reorganization	4	2	0.13	0.00577	0.213427	TAO3,TOR2	YIL129C,YKL203C
GO:0023052	signaling	344	20	10.92	0.00602	0.22028	IRA1,GPR1,MSB2,ROM1,BCY1,RHO3,RPI1,CSS1,CYR1,HAL5,TOR1,PEX1,TOR2,LMO1,SRV2,AVO1,IRA2,ETT1,RAS1,RGA1	YBR140C,YDL035C,YGR014W,YGR070W,YIL033C,YIL118W,YIL119C,YIL169C,YJL005W,YJL165C,YJR066W,YKL197C,YKL203C,YLL007C,YNL138W,YOL078W,YOL081W,YOR051C,YOR101W,YOR127W
GO:0006366	transcription from RNA polymerase II promoter	493	26	15.65	0.00657	0.237848	PDR3,GAL3,LYS14,PHO4,PDR1,AFT1,GTS1,RIM101,RPI1,RGT1,NUP120,KTI12,HAP1,MOT3,MSS11,PAH1,THO2,YAP7,HAL9,CTR9,ETT1,SFL1,YRR1,PIP2,MOT1,MED1	YBL005W,YDR009W,YDR034C,YFR034C,YGL013C,YGL071W,YGL181W,YHL027W,YIL119C,YKL038W,YKL057C,YKL110C,YLR256W,YMR070W,YMR164C,YMR165C,YNL139C,YOL028C,YOL089C,YOL145C,YOR051C,YOR140W,YOR162C,YOR363C,YPL082C,YPR070W
GO:0007015	actin filament organization	71	7	2.25	0.00695	0.248956	RHO3,TAO3,TOR2,END3,SRV2,WHI2,RGA1	YIL118W,YIL129C,YKL203C,YNL084C,YNL138W,YOR043W,YOR127W
GO:0000023	maltose metabolic process	13	3	0.41	0.00712	0.249787	IMA1,MAL11,IMA2	YGR287C,YGR289C,YOL157C
GO:0055074	calcium ion homeostasis	13	3	0.41	0.00712	0.249787	FLC2,VCX1,PMR1	YAL053W,YDL128W,YGL167C
GO:0006810	transport	1305	56	41.43	0.0072	0.250016	FLC2,SWH1,FUR4,RIM2,PCA1,PHO89,USO1,VCX1,ENA5,ENA1,PEX5,TRS23,TOM1,GNP1,SEC3,AFT1,PMR1,GTS1,MSP1,MAL11,COS6,MUP3,COS8,ERC1,RHO3,QDR1,YIL166C,NOP9,APL1,VPS70,RGT1,NUP120,PEX1,TOR2,FRE2,PTR2,GAL2,FRE1,PHO84,SAL1,END3,THO2,MEP2,ATG19,PHM7,RPS19A,ALR1,FRE7,AUS1,WHI2,NRT1,INP53,PDR5,COT1,SSU1,RTT10	YAL053W,YAR042W,YBR021W,YBR192W,YBR295W,YBR296C,YDL058W,YDL128W,YDR038C,YDR040C,YDR244W,YDR246W,YDR457W,YDR508C,YER008C,YGL071W,YGL167C,YGL181W,YGR028W,YGR289C,YGR295C,YHL036W,YHL048W,YHR032W,YIL118W,YIL120W,YIL166C,YJL010C,YJR005W,YJR126C,YKL038W,YKL057C,YKL197C,YKL203C,YKL220C,YKR093W,YLR081W,YLR214W,YML123C,YNL083W,YNL084C,YNL139C,YNL142W,YOL082W,YOL084W,YOL121C,YOL130W,YOL152W,YOR011W,YOR043W…
GO:0009152	purine ribonucleotide biosynthetic process	55	6	1.75	0.00752	0.258491	IRA1,BCY1,CYR1,IRA2,RAS1,ADE2	YBR140C,YIL033C,YJL005W,YOL081W,YOR101W,YOR128C
GO:0051171	regulation of nitrogen compound metabolic process	947	43	30.07	0.00775	0.263732	PDR3,IRA1,DCC1,GAL3,LYS14,TOM1,PHO4,PDR1,AFT1,GTS1,RIM101,BCY1,RPI1,ASG1,TOR1,RGT1,NUP120,KTI12,TOR2,ACE2,TUB4,CDC123,HAP1,ZDS2,MOT3,MSS11,PAH1,NAM9,THO2,IPI3,YAP7,IRA2,HAL9,PAP2,CTR9,ETT1,RAS1,SFL1,ARP8,YRR1,PIP2,MOT1,MED1	YBL005W,YBR140C,YCL016C,YDR009W,YDR034C,YDR457W,YFR034C,YGL013C,YGL071W,YGL181W,YHL027W,YIL033C,YIL119C,YIL130W,YJR066W,YKL038W,YKL057C,YKL110C,YKL203C,YLR131C,YLR212C,YLR215C,YLR256W,YML109W,YMR070W,YMR164C,YMR165C,YNL137C,YNL139C,YNL182C,YOL028C,YOL081W,YOL089C,YOL115W,YOL145C,YOR051C,YOR101W,YOR140W,YOR141C,YOR162C,YOR363C,YPL082C,YPR070W
GO:0097435	supramolecular fiber organization	110	9	3.49	0.00794	0.267523	MSP1,RHO3,TAO3,TOR2,TUB4,END3,SRV2,WHI2,RGA1	YGR028W,YIL118W,YIL129C,YKL203C,YLR212C,YNL084C,YNL138W,YOR043W,YOR127W
GO:0030003	cellular cation homeostasis	131	10	4.16	0.00847	0.277803	PCA1,VCX1,PMR1,HAL5,NFU1,FRE2,FRE1,MAM3,PDR5,COT1	YBR295W,YDL128W,YGL167C,YJL165C,YKL040C,YKL220C,YLR214W,YOL060C,YOR153W,YOR316C
GO:0006875	cellular metal ion homeostasis	92	8	2.92	0.00849	0.277803	PCA1,VCX1,PMR1,NFU1,FRE2,FRE1,MAM3,COT1	YBR295W,YDL128W,YGL167C,YKL040C,YKL220C,YLR214W,YOL060C,YOR316C
GO:0006970	response to osmotic stress	92	8	2.92	0.00849	0.277803	FLC2,ENA1,MSB2,MNN4,PSR1,MOT3,HAL9,WHI2	YAL053W,YDR040C,YGR014W,YKL201C,YLL010C,YMR070W,YOL089C,YOR043W
GO:0040008	regulation of growth	57	6	1.81	0.00894	0.285913	TOR1,TOR2,MSS11,AVO1,WHI2,SFL1	YJR066W,YKL203C,YMR164C,YOL078W,YOR043W,YOR140W
GO:0001666	response to hypoxia	5	2	0.16	0.00941	0.285913	HAP1,ETT1	YLR256W,YOR051C
GO:0007187	G-protein coupled receptor signaling pathway, coupled to cyclic nucleotide second messenger	5	2	0.16	0.00941	0.285913	CYR1,RAS1	YJL005W,YOR101W
GO:0007188	adenylate cyclase-modulating G-protein coupled receptor signaling pathway	5	2	0.16	0.00941	0.285913	CYR1,RAS1	YJL005W,YOR101W
GO:0046083	adenine metabolic process	5	2	0.16	0.00941	0.285913	AAH1,ADE2	YNL141W,YOR128C
GO:0071168	protein localization to chromatin	5	2	0.16	0.00941	0.285913	SCC2,HAP1	YDR180W,YLR256W
GO:0071456	cellular response to hypoxia	5	2	0.16	0.00941	0.285913	HAP1,ETT1	YLR256W,YOR051C
GO:1900544	positive regulation of purine nucleotide metabolic process	5	2	0.16	0.00941	0.285913	BCY1,RAS1	YIL033C,YOR101W
GO:0006164	purine nucleotide biosynthetic process	58	6	1.84	0.00971	0.292417	IRA1,BCY1,CYR1,IRA2,RAS1,ADE2	YBR140C,YIL033C,YJL005W,YOL081W,YOR101W,YOR128C
GO:0035556	intracellular signal transduction	220	14	6.98	0.00985	0.294031	IRA1,ROM1,BCY1,RHO3,RPI1,CYR1,HAL5,TOR1,TOR2,LMO1,SRV2,AVO1,IRA2,RAS1	YBR140C,YGR070W,YIL033C,YIL118W,YIL119C,YJL005W,YJL165C,YJR066W,YKL203C,YLL007C,YNL138W,YOL078W,YOL081W,YOR101W
GO:0007165	signal transduction	339	19	10.76	0.01074	0.315071	IRA1,GPR1,MSB2,ROM1,BCY1,RHO3,RPI1,CSS1,CYR1,HAL5,TOR1,TOR2,LMO1,SRV2,AVO1,IRA2,ETT1,RAS1,RGA1	YBR140C,YDL035C,YGR014W,YGR070W,YIL033C,YIL118W,YIL119C,YIL169C,YJL005W,YJL165C,YJR066W,YKL203C,YLL007C,YNL138W,YOL078W,YOL081W,YOR051C,YOR101W,YOR127W
GO:0044700	single organism signaling	339	19	10.76	0.01074	0.315071	IRA1,GPR1,MSB2,ROM1,BCY1,RHO3,RPI1,CSS1,CYR1,HAL5,TOR1,TOR2,LMO1,SRV2,AVO1,IRA2,ETT1,RAS1,RGA1	YBR140C,YDL035C,YGR014W,YGR070W,YIL033C,YIL118W,YIL119C,YIL169C,YJL005W,YJL165C,YJR066W,YKL203C,YLL007C,YNL138W,YOL078W,YOL081W,YOR051C,YOR101W,YOR127W
GO:0034220	ion transmembrane transport	158	11	5.02	0.01142	0.332156	PCA1,PHO89,ENA5,ENA1,GNP1,PMR1,MUP3,PHO84,MEP2,ALR1,COT1	YBR295W,YBR296C,YDR038C,YDR040C,YDR508C,YGL167C,YHL036W,YML123C,YNL142W,YOL130W,YOR316C
GO:0072507	divalent inorganic cation homeostasis	29	4	0.92	0.01255	0.361929	FLC2,VCX1,PMR1,COT1	YAL053W,YDL128W,YGL167C,YOR316C
GO:0034654	nucleobase-containing compound biosynthetic process	948	42	30.1	0.01294	0.366737	PDR3,IRA1,PSA1,GAL3,LYS14,TOM1,YEF1,PHO4,PDR1,AFT1,GTS1,RIM101,BCY1,RPI1,MET18,ASG1,CYR1,TOR1,RGT1,NUP120,KTI12,ACE2,HAP1,ZDS2,MOT3,MSS11,PAH1,THO2,AAH1,YAP7,IRA2,HAL9,CTR9,ETT1,RAS1,ADE2,SFL1,ARP8,YRR1,PIP2,MOT1,MED1	YBL005W,YBR140C,YDL055C,YDR009W,YDR034C,YDR457W,YEL041W,YFR034C,YGL013C,YGL071W,YGL181W,YHL027W,YIL033C,YIL119C,YIL128W,YIL130W,YJL005W,YJR066W,YKL038W,YKL057C,YKL110C,YLR131C,YLR256W,YML109W,YMR070W,YMR164C,YMR165C,YNL139C,YNL141W,YOL028C,YOL081W,YOL089C,YOL145C,YOR051C,YOR101W,YOR128C,YOR140W,YOR141C,YOR162C,YOR363C,YPL082C,YPR070W
GO:0044093	positive regulation of molecular function	99	8	3.14	0.01295	0.366737	IRA1,RPP1A,CDC53,ROM1,BCY1,TOR2,IRA2,RAS1	YBR140C,YDL081C,YDL132W,YGR070W,YIL033C,YKL203C,YOL081W,YOR101W
GO:0048878	chemical homeostasis	205	13	6.51	0.01304	0.366737	FLC2,PCA1,GPR1,VCX1,PMR1,HAL5,NFU1,FRE2,FRE1,MAM3,FRE7,PDR5,COT1	YAL053W,YBR295W,YDL035C,YDL128W,YGL167C,YJL165C,YKL040C,YKL220C,YLR214W,YOL060C,YOL152W,YOR153W,YOR316C
GO:0080090	regulation of primary metabolic process	1090	47	34.61	0.01358	0.376236	PDR3,IRA1,DCC1,RPP1A,CDC53,GAL3,LYS14,TOM1,PHO4,PDR1,AFT1,GTS1,RIM101,BCY1,RPI1,ASG1,TOR1,RGT1,NUP120,KTI12,TOR2,ACE2,TUB4,CDC123,HAP1,ZDS2,MOT3,MSS11,PAH1,TCB2,NAM9,THO2,IPI3,YAP7,IRA2,HAL9,PAP2,CTR9,ETT1,RAS1,UBP2,SFL1,ARP8,YRR1,PIP2,MOT1,MED1	YBL005W,YBR140C,YCL016C,YDL081C,YDL132W,YDR009W,YDR034C,YDR457W,YFR034C,YGL013C,YGL071W,YGL181W,YHL027W,YIL033C,YIL119C,YIL130W,YJR066W,YKL038W,YKL057C,YKL110C,YKL203C,YLR131C,YLR212C,YLR215C,YLR256W,YML109W,YMR070W,YMR164C,YMR165C,YNL087W,YNL137C,YNL139C,YNL182C,YOL028C,YOL081W,YOL089C,YOL115W,YOL145C,YOR051C,YOR101W,YOR124C,YOR140W,YOR141C,YOR162C,YOR363C,YPL082C,YPR070W
GO:0098771	inorganic ion homeostasis	141	10	4.48	0.01381	0.376236	FLC2,PCA1,VCX1,PMR1,NFU1,FRE2,FRE1,MAM3,FRE7,COT1	YAL053W,YBR295W,YDL128W,YGL167C,YKL040C,YKL220C,YLR214W,YOL060C,YOL152W,YOR316C
GO:0034086	maintenance of sister chromatid cohesion	6	2	0.19	0.01382	0.376236	DCC1,RAD61	YCL016C,YDR014W
GO:0045981	positive regulation of nucleotide metabolic process	6	2	0.19	0.01382	0.376236	BCY1,RAS1	YIL033C,YOR101W
GO:0043087	regulation of GTPase activity	30	4	0.95	0.01413	0.381622	IRA1,ROM1,TOR2,IRA2	YBR140C,YGR070W,YKL203C,YOL081W
GO:0031326	regulation of cellular biosynthetic process	926	41	29.4	0.01425	0.381833	PDR3,IRA1,DCC1,GAL3,LYS14,TOM1,PHO4,PDR1,AFT1,GTS1,RIM101,BCY1,RPI1,ASG1,TOR1,RGT1,NUP120,KTI12,ACE2,TUB4,CDC123,HAP1,ZDS2,MOT3,MSS11,PAH1,NAM9,THO2,IPI3,YAP7,IRA2,HAL9,CTR9,ETT1,RAS1,SFL1,ARP8,YRR1,PIP2,MOT1,MED1	YBL005W,YBR140C,YCL016C,YDR009W,YDR034C,YDR457W,YFR034C,YGL013C,YGL071W,YGL181W,YHL027W,YIL033C,YIL119C,YIL130W,YJR066W,YKL038W,YKL057C,YKL110C,YLR131C,YLR212C,YLR215C,YLR256W,YML109W,YMR070W,YMR164C,YMR165C,YNL137C,YNL139C,YNL182C,YOL028C,YOL081W,YOL089C,YOL145C,YOR051C,YOR101W,YOR140W,YOR141C,YOR162C,YOR363C,YPL082C,YPR070W
GO:0009889	regulation of biosynthetic process	927	41	29.43	0.0145	0.385146	PDR3,IRA1,DCC1,GAL3,LYS14,TOM1,PHO4,PDR1,AFT1,GTS1,RIM101,BCY1,RPI1,ASG1,TOR1,RGT1,NUP120,KTI12,ACE2,TUB4,CDC123,HAP1,ZDS2,MOT3,MSS11,PAH1,NAM9,THO2,IPI3,YAP7,IRA2,HAL9,CTR9,ETT1,RAS1,SFL1,ARP8,YRR1,PIP2,MOT1,MED1	YBL005W,YBR140C,YCL016C,YDR009W,YDR034C,YDR457W,YFR034C,YGL013C,YGL071W,YGL181W,YHL027W,YIL033C,YIL119C,YIL130W,YJR066W,YKL038W,YKL057C,YKL110C,YLR131C,YLR212C,YLR215C,YLR256W,YML109W,YMR070W,YMR164C,YMR165C,YNL137C,YNL139C,YNL182C,YOL028C,YOL081W,YOL089C,YOL145C,YOR051C,YOR101W,YOR140W,YOR141C,YOR162C,YOR363C,YPL082C,YPR070W
GO:0030258	lipid modification	46	5	1.46	0.0146	0.385146	EHD3,MSS4,TCB2,INP53,PIP2	YDR036C,YDR208W,YNL087W,YOR109W,YOR363C
GO:0046352	disaccharide catabolic process	17	3	0.54	0.01542	0.403648	IMA1,MAL11,IMA2	YGR287C,YGR289C,YOL157C
GO:0006873	cellular ion homeostasis	144	10	4.57	0.01582	0.410958	PCA1,VCX1,PMR1,HAL5,NFU1,FRE2,FRE1,MAM3,PDR5,COT1	YBR295W,YDL128W,YGL167C,YJL165C,YKL040C,YKL220C,YLR214W,YOL060C,YOR153W,YOR316C
GO:0055076	transition metal ion homeostasis	84	7	2.67	0.01679	0.432851	PCA1,NFU1,FRE2,FRE1,MAM3,FRE7,COT1	YBR295W,YKL040C,YKL220C,YLR214W,YOL060C,YOL152W,YOR316C
GO:0019216	regulation of lipid metabolic process	48	5	1.52	0.01734	0.440358	GTS1,TOR1,MOT3,TCB2,PIP2	YGL181W,YJR066W,YMR070W,YNL087W,YOR363C
GO:0033554	cellular response to stress	692	32	21.97	0.01734	0.440358	FLC2,RAD16,DCC1,ENA1,SCC2,PHO4,AFT1,MSB2,RIM101,MET18,TOR1,NUP120,APN1,MNN4,TOR2,UBA1,PSR1,MNL2,HAP1,MOT3,ECM5,MKT1,THO2,MEP2,IRA2,ATG19,PAP2,CTR9,ETT1,ARP8,YRR1,GLR1	YAL053W,YBR114W,YCL016C,YDR040C,YDR180W,YFR034C,YGL071W,YGR014W,YHL027W,YIL128W,YJR066W,YKL057C,YKL114C,YKL201C,YKL203C,YKL210W,YLL010C,YLR057W,YLR256W,YMR070W,YMR176W,YNL085W,YNL139C,YNL142W,YOL081W,YOL082W,YOL115W,YOL145C,YOR051C,YOR141C,YOR162C,YPL091W
GO:0009313	oligosaccharide catabolic process	18	3	0.57	0.01808	0.45575	IMA1,MAL11,IMA2	YGR287C,YGR289C,YOL157C
GO:0019725	cellular homeostasis	215	13	6.83	0.01874	0.468913	PCA1,GPR1,VCX1,PMR1,HAL5,NFU1,FRE2,FRE1,MAM3,UBP2,PDR5,COT1,GLR1	YBR295W,YDL035C,YDL128W,YGL167C,YJL165C,YKL040C,YKL220C,YLR214W,YOL060C,YOR124C,YOR153W,YOR316C,YPL091W
GO:0065007	biological regulation	1961	76	62.26	0.01949	0.481316	FLC2,PDR3,IRA1,PCA1,DCC1,GPR1,RPP1A,VCX1,CDC53,GAL3,RAD61,LYS14,SCC2,TOM1,PHO4,PDR1,AFT1,PMR1,GTS1,MSB2,ROM1,CYS4,RIM101,BCY1,RHO3,RPI1,ASG1,CSS1,CYR1,HAL5,TOR1,BIR1,RGT1,NFU1,NUP120,KTI12,PEX1,TOR2,FRE2,LMO1,ACE2,TUB4,FRE1,CDC123,HAP1,ZDS2,MOT3,MSS11,PAH1,TCB2,NAM9,SRV2,THO2,IPI3,YAP7,MAM3,AVO1,IRA2,HAL9,PAP2,CTR9,FRE7,WHI2,ETT1,RAS1,UBP2,RGA1,SFL1,ARP8,PDR5,YRR1,COT1,PIP2,MOT1,GLR1,MED1	YAL053W,YBL005W,YBR140C,YBR295W,YCL016C,YDL035C,YDL081C,YDL128W,YDL132W,YDR009W,YDR014W,YDR034C,YDR180W,YDR457W,YFR034C,YGL013C,YGL071W,YGL167C,YGL181W,YGR014W,YGR070W,YGR155W,YHL027W,YIL033C,YIL118W,YIL119C,YIL130W,YIL169C,YJL005W,YJL165C,YJR066W,YJR089W,YKL038W,YKL040C,YKL057C,YKL110C,YKL197C,YKL203C,YKL220C,YLL007C,YLR131C,YLR212C,YLR214W,YLR215C,YLR256W,YML109W,YMR070W,YMR164C,YMR165C,YNL087W…
GO:1902532	negative regulation of intracellular signal transduction	33	4	1.05	0.01961	0.481316	IRA1,BCY1,AVO1,IRA2	YBR140C,YIL033C,YOL078W,YOL081W
GO:0055082	cellular chemical homeostasis	171	11	5.43	0.01966	0.481316	PCA1,GPR1,VCX1,PMR1,HAL5,NFU1,FRE2,FRE1,MAM3,PDR5,COT1	YBR295W,YDL035C,YDL128W,YGL167C,YJL165C,YKL040C,YKL220C,YLR214W,YOL060C,YOR153W,YOR316C
GO:0031323	regulation of cellular metabolic process	1114	47	35.37	0.01981	0.481525	PDR3,IRA1,DCC1,RPP1A,CDC53,GAL3,LYS14,TOM1,PHO4,PDR1,AFT1,GTS1,RIM101,BCY1,RPI1,ASG1,TOR1,RGT1,NUP120,KTI12,TOR2,ACE2,TUB4,CDC123,HAP1,ZDS2,MOT3,MSS11,PAH1,TCB2,NAM9,THO2,IPI3,YAP7,IRA2,HAL9,PAP2,CTR9,ETT1,RAS1,UBP2,SFL1,ARP8,YRR1,PIP2,MOT1,MED1	YBL005W,YBR140C,YCL016C,YDL081C,YDL132W,YDR009W,YDR034C,YDR457W,YFR034C,YGL013C,YGL071W,YGL181W,YHL027W,YIL033C,YIL119C,YIL130W,YJR066W,YKL038W,YKL057C,YKL110C,YKL203C,YLR131C,YLR212C,YLR215C,YLR256W,YML109W,YMR070W,YMR164C,YMR165C,YNL087W,YNL137C,YNL139C,YNL182C,YOL028C,YOL081W,YOL089C,YOL115W,YOL145C,YOR051C,YOR101W,YOR124C,YOR140W,YOR141C,YOR162C,YOR363C,YPL082C,YPR070W
GO:0098655	cation transmembrane transport	87	7	2.76	0.02002	0.483178	PCA1,ENA5,ENA1,PMR1,MEP2,ALR1,COT1	YBR295W,YDR038C,YDR040C,YGL167C,YNL142W,YOL130W,YOR316C
GO:0009260	ribonucleotide biosynthetic process	68	6	2.16	0.02027	0.485766	IRA1,BCY1,CYR1,IRA2,RAS1,ADE2	YBR140C,YIL033C,YJL005W,YOL081W,YOR101W,YOR128C
GO:0050794	regulation of cellular process	1581	63	50.19	0.02121	0.504739	PDR3,IRA1,DCC1,GPR1,RPP1A,CDC53,GAL3,RAD61,LYS14,TOM1,PHO4,PDR1,AFT1,GTS1,MSB2,ROM1,CYS4,RIM101,BCY1,RHO3,RPI1,ASG1,CSS1,CYR1,HAL5,TOR1,BIR1,RGT1,NUP120,KTI12,TOR2,LMO1,ACE2,TUB4,CDC123,HAP1,ZDS2,MOT3,MSS11,PAH1,TCB2,NAM9,SRV2,THO2,IPI3,YAP7,AVO1,IRA2,HAL9,PAP2,CTR9,ETT1,RAS1,UBP2,RGA1,SFL1,ARP8,YRR1,COT1,PIP2,MOT1,GLR1,MED1	YBL005W,YBR140C,YCL016C,YDL035C,YDL081C,YDL132W,YDR009W,YDR014W,YDR034C,YDR457W,YFR034C,YGL013C,YGL071W,YGL181W,YGR014W,YGR070W,YGR155W,YHL027W,YIL033C,YIL118W,YIL119C,YIL130W,YIL169C,YJL005W,YJL165C,YJR066W,YJR089W,YKL038W,YKL057C,YKL110C,YKL203C,YLL007C,YLR131C,YLR212C,YLR215C,YLR256W,YML109W,YMR070W,YMR164C,YMR165C,YNL087W,YNL137C,YNL138W,YNL139C,YNL182C,YOL028C,YOL078W,YOL081W,YOL089C,YOL115W…
GO:0009651	response to salt stress	34	4	1.08	0.02169	0.512577	ENA1,PSR1,HAL9,WHI2	YDR040C,YLL010C,YOL089C,YOR043W
GO:0043085	positive regulation of catalytic activity	89	7	2.83	0.0224	0.525705	IRA1,RPP1A,CDC53,ROM1,BCY1,IRA2,RAS1	YBR140C,YDL081C,YDL132W,YGR070W,YIL033C,YOL081W,YOR101W
GO:0046916	cellular transition metal ion homeostasis	70	6	2.22	0.02306	0.537488	PCA1,NFU1,FRE2,FRE1,MAM3,COT1	YBR295W,YKL040C,YKL220C,YLR214W,YOL060C,YOR316C
GO:0009150	purine ribonucleotide metabolic process	132	9	4.19	0.02399	0.543382	IRA1,QCR6,BCY1,CYR1,IRA2,ADH1,RAS1,CAT5,ADE2	YBR140C,YFR033C,YIL033C,YJL005W,YOL081W,YOL086C,YOR101W,YOR125C,YOR128C
GO:0006825	copper ion transport	20	3	0.63	0.02412	0.543382	FRE2,FRE1,FRE7	YKL220C,YLR214W,YOL152W
GO:0006972	hyperosmotic response	20	3	0.63	0.02412	0.543382	ENA1,MSB2,MOT3	YDR040C,YGR014W,YMR070W
GO:0051252	regulation of RNA metabolic process	737	33	23.4	0.02417	0.543382	PDR3,GAL3,LYS14,TOM1,PHO4,PDR1,AFT1,GTS1,RIM101,RPI1,ASG1,TOR1,RGT1,NUP120,KTI12,TOR2,ACE2,HAP1,ZDS2,MOT3,MSS11,PAH1,THO2,YAP7,HAL9,CTR9,ETT1,SFL1,ARP8,YRR1,PIP2,MOT1,MED1	YBL005W,YDR009W,YDR034C,YDR457W,YFR034C,YGL013C,YGL071W,YGL181W,YHL027W,YIL119C,YIL130W,YJR066W,YKL038W,YKL057C,YKL110C,YKL203C,YLR131C,YLR256W,YML109W,YMR070W,YMR164C,YMR165C,YNL139C,YOL028C,YOL089C,YOL145C,YOR051C,YOR140W,YOR141C,YOR162C,YOR363C,YPL082C,YPR070W
GO:0071214	cellular response to abiotic stimulus	71	6	2.25	0.02454	0.543382	FLC2,MSB2,RIM101,MNN4,PSR1,MOT3	YAL053W,YGR014W,YHL027W,YKL201C,YLL010C,YMR070W
GO:0006814	sodium ion transport	8	2	0.25	0.02475	0.543382	ENA5,ENA1	YDR038C,YDR040C
GO:0031120	snRNA pseudouridine synthesis	8	2	0.25	0.02475	0.543382	TOR1,TOR2	YJR066W,YKL203C
GO:0031122	cytoplasmic microtubule organization	8	2	0.25	0.02475	0.543382	MSP1,TUB4	YGR028W,YLR212C
GO:0040031	snRNA modification	8	2	0.25	0.02475	0.543382	TOR1,TOR2	YJR066W,YKL203C
GO:0019438	aromatic compound biosynthetic process	1017	43	32.29	0.02525	0.550806	PDR3,IRA1,PSA1,GAL3,LYS14,TOM1,YEF1,PHO4,PDR1,AFT1,GTS1,RIM101,BCY1,HIS5,RPI1,MET18,ASG1,CYR1,TOR1,RGT1,NUP120,KTI12,ACE2,HAP1,ZDS2,MOT3,MSS11,PAH1,THO2,AAH1,YAP7,IRA2,HAL9,CTR9,ETT1,RAS1,ADE2,SFL1,ARP8,YRR1,PIP2,MOT1,MED1	YBL005W,YBR140C,YDL055C,YDR009W,YDR034C,YDR457W,YEL041W,YFR034C,YGL013C,YGL071W,YGL181W,YHL027W,YIL033C,YIL116W,YIL119C,YIL128W,YIL130W,YJL005W,YJR066W,YKL038W,YKL057C,YKL110C,YLR131C,YLR256W,YML109W,YMR070W,YMR164C,YMR165C,YNL139C,YNL141W,YOL028C,YOL081W,YOL089C,YOL145C,YOR051C,YOR101W,YOR128C,YOR140W,YOR141C,YOR162C,YOR363C,YPL082C,YPR070W
GO:1901293	nucleoside phosphate biosynthetic process	112	8	3.56	0.02545	0.551633	IRA1,YEF1,BCY1,CYR1,AAH1,IRA2,RAS1,ADE2	YBR140C,YEL041W,YIL033C,YJL005W,YNL141W,YOL081W,YOR101W,YOR128C
GO:0072521	purine-containing compound metabolic process	156	10	4.95	0.02611	0.562357	IRA1,QCR6,BCY1,CYR1,AAH1,IRA2,ADH1,RAS1,CAT5,ADE2	YBR140C,YFR033C,YIL033C,YJL005W,YNL141W,YOL081W,YOL086C,YOR101W,YOR125C,YOR128C
GO:1901362	organic cyclic compound biosynthetic process	1079	45	34.26	0.02737	0.57104	PDR3,IRA1,PSA1,GAL3,LYS14,TOM1,YEF1,PHO4,PDR1,AFT1,GTS1,RIM101,ERG11,BCY1,HIS5,RPI1,MET18,ASG1,CYR1,TOR1,RGT1,NUP120,KTI12,ACE2,HAP1,ZDS2,MOT3,MSS11,PAH1,THO2,AAH1,YAP7,IRA2,HAL9,CTR9,ETT1,RAS1,ADE2,SFL1,ARP8,YRR1,PIP2,ERG10,MOT1,MED1	YBL005W,YBR140C,YDL055C,YDR009W,YDR034C,YDR457W,YEL041W,YFR034C,YGL013C,YGL071W,YGL181W,YHL027W,YHR007C,YIL033C,YIL116W,YIL119C,YIL128W,YIL130W,YJL005W,YJR066W,YKL038W,YKL057C,YKL110C,YLR131C,YLR256W,YML109W,YMR070W,YMR164C,YMR165C,YNL139C,YNL141W,YOL028C,YOL081W,YOL089C,YOL145C,YOR051C,YOR101W,YOR128C,YOR140W,YOR141C,YOR162C,YOR363C,YPL028W,YPL082C,YPR070W
GO:0050789	regulation of biological process	1690	66	53.66	0.02746	0.57104	PDR3,IRA1,DCC1,GPR1,RPP1A,CDC53,GAL3,RAD61,LYS14,SCC2,TOM1,PHO4,PDR1,AFT1,GTS1,MSB2,ROM1,CYS4,RIM101,BCY1,RHO3,RPI1,ASG1,CSS1,CYR1,HAL5,TOR1,BIR1,RGT1,NUP120,KTI12,PEX1,TOR2,LMO1,ACE2,TUB4,CDC123,HAP1,ZDS2,MOT3,MSS11,PAH1,TCB2,NAM9,SRV2,THO2,IPI3,YAP7,AVO1,IRA2,HAL9,PAP2,CTR9,WHI2,ETT1,RAS1,UBP2,RGA1,SFL1,ARP8,YRR1,COT1,PIP2,MOT1,GLR1,MED1	YBL005W,YBR140C,YCL016C,YDL035C,YDL081C,YDL132W,YDR009W,YDR014W,YDR034C,YDR180W,YDR457W,YFR034C,YGL013C,YGL071W,YGL181W,YGR014W,YGR070W,YGR155W,YHL027W,YIL033C,YIL118W,YIL119C,YIL130W,YIL169C,YJL005W,YJL165C,YJR066W,YJR089W,YKL038W,YKL057C,YKL110C,YKL197C,YKL203C,YLL007C,YLR131C,YLR212C,YLR215C,YLR256W,YML109W,YMR070W,YMR164C,YMR165C,YNL087W,YNL137C,YNL138W,YNL139C,YNL182C,YOL028C,YOL078W,YOL081W…
GO:0009062	fatty acid catabolic process	21	3	0.67	0.02749	0.57104	EHD3,PAH1,PIP2	YDR036C,YMR165C,YOR363C
GO:0043547	positive regulation of GTPase activity	21	3	0.67	0.02749	0.57104	IRA1,ROM1,IRA2	YBR140C,YGR070W,YOL081W
GO:0043618	regulation of transcription from RNA polymerase II promoter in response to stress	54	5	1.71	0.02752	0.57104	AFT1,HAP1,MOT3,ETT1,YRR1	YGL071W,YLR256W,YMR070W,YOR051C,YOR162C
GO:0043620	regulation of DNA-templated transcription in response to stress	54	5	1.71	0.02752	0.57104	AFT1,HAP1,MOT3,ETT1,YRR1	YGL071W,YLR256W,YMR070W,YOR051C,YOR162C
GO:0006163	purine nucleotide metabolic process	136	9	4.32	0.02843	0.586347	IRA1,QCR6,BCY1,CYR1,IRA2,ADH1,RAS1,CAT5,ADE2	YBR140C,YFR033C,YIL033C,YJL005W,YOL081W,YOL086C,YOR101W,YOR125C,YOR128C
GO:0007163	establishment or maintenance of cell polarity	115	8	3.65	0.02923	0.590921	SWH1,MSB2,RHO3,TOR2,ZDS2,END3,AVO1,RGA1	YAR042W,YGR014W,YIL118W,YKL203C,YML109W,YNL084C,YOL078W,YOR127W
GO:0007124	pseudohyphal growth	74	6	2.35	0.02939	0.590921	GPR1,FLO11,MSS11,MEP2,RGA1,SFL1	YDL035C,YIR019C,YMR164C,YNL142W,YOR127W,YOR140W
GO:0046390	ribose phosphate biosynthetic process	74	6	2.35	0.02939	0.590921	IRA1,BCY1,CYR1,IRA2,RAS1,ADE2	YBR140C,YIL033C,YJL005W,YOL081W,YOR101W,YOR128C
GO:0055072	iron ion homeostasis	55	5	1.75	0.02952	0.590921	PCA1,NFU1,FRE2,FRE1,FRE7	YBR295W,YKL040C,YKL220C,YLR214W,YOL152W
GO:0071470	cellular response to osmotic stress	55	5	1.75	0.02952	0.590921	FLC2,MSB2,MNN4,PSR1,MOT3	YAL053W,YGR014W,YKL201C,YLL010C,YMR070W
GO:1902589	single-organism organelle organization	481	23	15.27	0.03004	0.591933	DCC1,USO1,RAD61,SCC2,PEX5,AFT1,MSP1,RHO3,TAO3,YIL165C,BIR1,PEX1,TOR2,LMO1,TUB4,ATG39,PAH1,END3,SRV2,AVO1,WHI2,RGA1,SEY1	YCL016C,YDL058W,YDR014W,YDR180W,YDR244W,YGL071W,YGR028W,YIL118W,YIL129C,YIL165C,YJR089W,YKL197C,YKL203C,YLL007C,YLR212C,YLR312C,YMR165C,YNL084C,YNL138W,YOL078W,YOR043W,YOR127W,YOR165W
GO:0030036	actin cytoskeleton organization	116	8	3.68	0.03058	0.591933	RHO3,TAO3,TOR2,END3,SRV2,AVO1,WHI2,RGA1	YIL118W,YIL129C,YKL203C,YNL084C,YNL138W,YOL078W,YOR043W,YOR127W
GO:0000436	carbon catabolite activation of transcription from RNA polymerase II promoter	22	3	0.7	0.03111	0.591933	GAL3,HAP1,PIP2	YDR009W,YLR256W,YOR363C
GO:0016226	iron-sulfur cluster assembly	22	3	0.7	0.03111	0.591933	MET18,NFU1,NAR1	YIL128W,YKL040C,YNL240C
GO:0031163	metallo-sulfur cluster assembly	22	3	0.7	0.03111	0.591933	MET18,NFU1,NAR1	YIL128W,YKL040C,YNL240C
GO:0006276	plasmid maintenance	9	2	0.29	0.03116	0.591933	SCC2,PAH1	YDR180W,YMR165C
GO:0070199	establishment of protein localization to chromosome	9	2	0.29	0.03116	0.591933	SCC2,HAP1	YDR180W,YLR256W
GO:0007064	mitotic sister chromatid cohesion	38	4	1.21	0.03131	0.591933	DCC1,RAD61,SCC2,AFT1	YCL016C,YDR014W,YDR180W,YGL071W
GO:0007186	G-protein coupled receptor signaling pathway	38	4	1.21	0.03131	0.591933	GPR1,CYR1,RAS1,RGA1	YDL035C,YJL005W,YOR101W,YOR127W
GO:0044275	cellular carbohydrate catabolic process	38	4	1.21	0.03131	0.591933	IMA1,MAL11,MSS11,IMA2	YGR287C,YGR289C,YMR164C,YOL157C
GO:0018130	heterocycle biosynthetic process	1034	43	32.83	0.03248	0.61066	PDR3,IRA1,PSA1,GAL3,LYS14,TOM1,YEF1,PHO4,PDR1,AFT1,GTS1,RIM101,BCY1,HIS5,RPI1,MET18,ASG1,CYR1,TOR1,RGT1,NUP120,KTI12,ACE2,HAP1,ZDS2,MOT3,MSS11,PAH1,THO2,AAH1,YAP7,IRA2,HAL9,CTR9,ETT1,RAS1,ADE2,SFL1,ARP8,YRR1,PIP2,MOT1,MED1	YBL005W,YBR140C,YDL055C,YDR009W,YDR034C,YDR457W,YEL041W,YFR034C,YGL013C,YGL071W,YGL181W,YHL027W,YIL033C,YIL116W,YIL119C,YIL128W,YIL130W,YJL005W,YJR066W,YKL038W,YKL057C,YKL110C,YLR131C,YLR256W,YML109W,YMR070W,YMR164C,YMR165C,YNL139C,YNL141W,YOL028C,YOL081W,YOL089C,YOL145C,YOR051C,YOR101W,YOR128C,YOR140W,YOR141C,YOR162C,YOR363C,YPL082C,YPR070W
GO:1902531	regulation of intracellular signal transduction	77	6	2.44	0.03482	0.651057	IRA1,ROM1,BCY1,TOR2,AVO1,IRA2	YBR140C,YGR070W,YIL033C,YKL203C,YOL078W,YOL081W
GO:0006950	response to stress	787	34	24.99	0.03534	0.65717	FLC2,RAD16,DCC1,ENA1,SCC2,PHO4,AFT1,MSB2,RIM101,MET18,TOR1,NUP120,APN1,MNN4,TOR2,UBA1,PSR1,MNL2,HAP1,MOT3,ECM5,MKT1,THO2,MEP2,IRA2,ATG19,HAL9,PAP2,CTR9,WHI2,ETT1,ARP8,YRR1,GLR1	YAL053W,YBR114W,YCL016C,YDR040C,YDR180W,YFR034C,YGL071W,YGR014W,YHL027W,YIL128W,YJR066W,YKL057C,YKL114C,YKL201C,YKL203C,YKL210W,YLL010C,YLR057W,YLR256W,YMR070W,YMR176W,YNL085W,YNL139C,YNL142W,YOL081W,YOL082W,YOL089C,YOL115W,YOL145C,YOR043W,YOR051C,YOR141C,YOR162C,YPL091W
GO:0030029	actin filament-based process	121	8	3.84	0.03794	0.686902	RHO3,TAO3,TOR2,END3,SRV2,AVO1,WHI2,RGA1	YIL118W,YIL129C,YKL203C,YNL084C,YNL138W,YOL078W,YOR043W,YOR127W
GO:0006816	calcium ion transport	10	2	0.32	0.03815	0.686902	VCX1,PMR1	YDL128W,YGL167C
GO:0010507	negative regulation of autophagy	10	2	0.32	0.03815	0.686902	TOR1,TOR2	YJR066W,YKL203C
GO:0015851	nucleobase transport	10	2	0.32	0.03815	0.686902	FUR4,NRT1	YBR021W,YOR071C
GO:0051238	sequestering of metal ion	10	2	0.32	0.03815	0.686902	NFU1,COT1	YKL040C,YOR316C
GO:0097271	protein localization to bud neck	10	2	0.32	0.03815	0.686902	BCY1,RAS1	YIL033C,YOR101W
GO:0001403	invasive growth in response to glucose limitation	59	5	1.87	0.03842	0.688122	GPR1,FLO11,MSS11,RGA1,SFL1	YDL035C,YIR019C,YMR164C,YOR127W,YOR140W
GO:0072348	sulfur compound transport	24	3	0.76	0.03905	0.695744	MUP3,NRT1,SSU1	YHL036W,YOR071C,YPL092W
GO:1901522	positive regulation of transcription from RNA polymerase II promoter involved in cellular response to chemical stimulus	41	4	1.3	0.03994	0.703345	GAL3,HAP1,ETT1,PIP2	YDR009W,YLR256W,YOR051C,YOR363C
GO:0009259	ribonucleotide metabolic process	145	9	4.6	0.04048	0.703345	IRA1,QCR6,BCY1,CYR1,IRA2,ADH1,RAS1,CAT5,ADE2	YBR140C,YFR033C,YIL033C,YJL005W,YOL081W,YOL086C,YOR101W,YOR125C,YOR128C
GO:0019220	regulation of phosphate metabolic process	145	9	4.6	0.04048	0.703345	IRA1,RPP1A,PHO4,GTS1,BCY1,TCB2,IRA2,CTR9,RAS1	YBR140C,YDL081C,YFR034C,YGL181W,YIL033C,YNL087W,YOL081W,YOL145C,YOR101W
GO:0051174	regulation of phosphorus metabolic process	145	9	4.6	0.04048	0.703345	IRA1,RPP1A,PHO4,GTS1,BCY1,TCB2,IRA2,CTR9,RAS1	YBR140C,YDL081C,YFR034C,YGL181W,YIL033C,YNL087W,YOL081W,YOL145C,YOR101W
GO:0006914	autophagy	168	10	5.33	0.04051	0.703345	SWH1,TRS23,PMR1,YIL165C,TOR1,TOR2,LMO1,ATG39,ATG19,WHI2	YAR042W,YDR246W,YGL167C,YIL165C,YJR066W,YKL203C,YLL007C,YLR312C,YOL082W,YOR043W
GO:0019222	regulation of metabolic process	1196	48	37.97	0.04191	0.723958	PDR3,IRA1,DCC1,RPP1A,CDC53,GAL3,LYS14,SCC2,TOM1,PHO4,PDR1,AFT1,GTS1,RIM101,BCY1,RPI1,ASG1,TOR1,RGT1,NUP120,KTI12,TOR2,ACE2,TUB4,CDC123,HAP1,ZDS2,MOT3,MSS11,PAH1,TCB2,NAM9,THO2,IPI3,YAP7,IRA2,HAL9,PAP2,CTR9,ETT1,RAS1,UBP2,SFL1,ARP8,YRR1,PIP2,MOT1,MED1	YBL005W,YBR140C,YCL016C,YDL081C,YDL132W,YDR009W,YDR034C,YDR180W,YDR457W,YFR034C,YGL013C,YGL071W,YGL181W,YHL027W,YIL033C,YIL119C,YIL130W,YJR066W,YKL038W,YKL057C,YKL110C,YKL203C,YLR131C,YLR212C,YLR215C,YLR256W,YML109W,YMR070W,YMR164C,YMR165C,YNL087W,YNL137C,YNL139C,YNL182C,YOL028C,YOL081W,YOL089C,YOL115W,YOL145C,YOR051C,YOR101W,YOR124C,YOR140W,YOR141C,YOR162C,YOR363C,YPL082C,YPR070W
GO:0006879	cellular iron ion homeostasis	42	4	1.33	0.04309	0.733176	PCA1,NFU1,FRE2,FRE1	YBR295W,YKL040C,YKL220C,YLR214W
GO:0009968	negative regulation of signal transduction	42	4	1.33	0.04309	0.733176	IRA1,BCY1,AVO1,IRA2	YBR140C,YIL033C,YOL078W,YOL081W
GO:0023057	negative regulation of signaling	42	4	1.33	0.04309	0.733176	IRA1,BCY1,AVO1,IRA2	YBR140C,YIL033C,YOL078W,YOL081W
GO:0006355	regulation of transcription, DNA-templated	718	31	22.8	0.04425	0.741787	PDR3,GAL3,LYS14,TOM1,PHO4,PDR1,AFT1,GTS1,RIM101,RPI1,ASG1,RGT1,NUP120,KTI12,ACE2,HAP1,ZDS2,MOT3,MSS11,PAH1,THO2,YAP7,HAL9,CTR9,ETT1,SFL1,ARP8,YRR1,PIP2,MOT1,MED1	YBL005W,YDR009W,YDR034C,YDR457W,YFR034C,YGL013C,YGL071W,YGL181W,YHL027W,YIL119C,YIL130W,YKL038W,YKL057C,YKL110C,YLR131C,YLR256W,YML109W,YMR070W,YMR164C,YMR165C,YNL139C,YOL028C,YOL089C,YOL145C,YOR051C,YOR140W,YOR141C,YOR162C,YOR363C,YPL082C,YPR070W
GO:1903506	regulation of nucleic acid-templated transcription	718	31	22.8	0.04425	0.741787	PDR3,GAL3,LYS14,TOM1,PHO4,PDR1,AFT1,GTS1,RIM101,RPI1,ASG1,RGT1,NUP120,KTI12,ACE2,HAP1,ZDS2,MOT3,MSS11,PAH1,THO2,YAP7,HAL9,CTR9,ETT1,SFL1,ARP8,YRR1,PIP2,MOT1,MED1	YBL005W,YDR009W,YDR034C,YDR457W,YFR034C,YGL013C,YGL071W,YGL181W,YHL027W,YIL119C,YIL130W,YKL038W,YKL057C,YKL110C,YLR131C,YLR256W,YML109W,YMR070W,YMR164C,YMR165C,YNL139C,YOL028C,YOL089C,YOL145C,YOR051C,YOR140W,YOR141C,YOR162C,YOR363C,YPL082C,YPR070W
GO:2001141	regulation of RNA biosynthetic process	718	31	22.8	0.04425	0.741787	PDR3,GAL3,LYS14,TOM1,PHO4,PDR1,AFT1,GTS1,RIM101,RPI1,ASG1,RGT1,NUP120,KTI12,ACE2,HAP1,ZDS2,MOT3,MSS11,PAH1,THO2,YAP7,HAL9,CTR9,ETT1,SFL1,ARP8,YRR1,PIP2,MOT1,MED1	YBL005W,YDR009W,YDR034C,YDR457W,YFR034C,YGL013C,YGL071W,YGL181W,YHL027W,YIL119C,YIL130W,YKL038W,YKL057C,YKL110C,YLR131C,YLR256W,YML109W,YMR070W,YMR164C,YMR165C,YNL139C,YOL028C,YOL089C,YOL145C,YOR051C,YOR140W,YOR141C,YOR162C,YOR363C,YPL082C,YPR070W
GO:0048583	regulation of response to stimulus	171	10	5.43	0.04482	0.747659	PDR3,IRA1,PDR1,ROM1,BCY1,TOR2,AVO1,IRA2,CTR9,ETT1	YBL005W,YBR140C,YGL013C,YGR070W,YIL033C,YKL203C,YOL078W,YOL081W,YOL145C,YOR051C
GO:0006817	phosphate ion transport	11	2	0.35	0.04568	0.752259	PHO89,PHO84	YBR296C,YML123C
GO:0044699	single-organism process	3252	115	103.25	0.04575	0.752259	FLC2,SWH1,FUR4,IRA1,RIM2,ALG7,PCA1,DCC1,GPR1,PSA1,USO1,VCX1,CDC53,HO,GAL3,RAD61,LYS14,EHD3,SCC2,MSS4,PEX5,TOM1,GNP1,YEF1,SEC3,QCR6,AFT1,PMR1,GTS1,KEX1,MSB2,MSP1,ROM1,GTO1,CYS4,PHO81,IMA1,MAL11,RIM101,MUP3,ERG11,ERC1,BCY1,HIS5,RHO3,RPI1,QDR1,TAO3,YIL165C,CSS1,FLO11,CYR1,HAL5,TOR1,BIR1,RGT1,NFU1,NUP120,KTI12,PEX1,MNN4,TOR2,FRE2,SFI1,LMO1,MNL2,GAL2,ACE2,TUB4,FRE1,CDC123,HAP1,ATG39,NKP2,ZDS2,PHO84,MO…	YAL053W,YAR042W,YBR021W,YBR140C,YBR192W,YBR243C,YBR295W,YCL016C,YDL035C,YDL055C,YDL058W,YDL128W,YDL132W,YDL227C,YDR009W,YDR014W,YDR034C,YDR036C,YDR180W,YDR208W,YDR244W,YDR457W,YDR508C,YEL041W,YER008C,YFR033C,YGL071W,YGL167C,YGL181W,YGL203C,YGR014W,YGR028W,YGR070W,YGR154C,YGR155W,YGR233C,YGR287C,YGR289C,YHL027W,YHL036W,YHR007C,YHR032W,YIL033C,YIL116W,YIL118W,YIL119C,YIL120W,YIL129C,YIL165C,YIL169C…
GO:0006351	transcription, DNA-templated	776	33	24.64	0.04598	0.752259	PDR3,GAL3,LYS14,TOM1,PHO4,PDR1,AFT1,GTS1,RIM101,RPI1,MET18,ASG1,TOR1,RGT1,NUP120,KTI12,ACE2,HAP1,ZDS2,MOT3,MSS11,PAH1,THO2,YAP7,HAL9,CTR9,ETT1,SFL1,ARP8,YRR1,PIP2,MOT1,MED1	YBL005W,YDR009W,YDR034C,YDR457W,YFR034C,YGL013C,YGL071W,YGL181W,YHL027W,YIL119C,YIL128W,YIL130W,YJR066W,YKL038W,YKL057C,YKL110C,YLR131C,YLR256W,YML109W,YMR070W,YMR164C,YMR165C,YNL139C,YOL028C,YOL089C,YOL145C,YOR051C,YOR140W,YOR141C,YOR162C,YOR363C,YPL082C,YPR070W
GO:0097659	nucleic acid-templated transcription	776	33	24.64	0.04598	0.752259	PDR3,GAL3,LYS14,TOM1,PHO4,PDR1,AFT1,GTS1,RIM101,RPI1,MET18,ASG1,TOR1,RGT1,NUP120,KTI12,ACE2,HAP1,ZDS2,MOT3,MSS11,PAH1,THO2,YAP7,HAL9,CTR9,ETT1,SFL1,ARP8,YRR1,PIP2,MOT1,MED1	YBL005W,YDR009W,YDR034C,YDR457W,YFR034C,YGL013C,YGL071W,YGL181W,YHL027W,YIL119C,YIL128W,YIL130W,YJR066W,YKL038W,YKL057C,YKL110C,YLR131C,YLR256W,YML109W,YMR070W,YMR164C,YMR165C,YNL139C,YOL028C,YOL089C,YOL145C,YOR051C,YOR140W,YOR141C,YOR162C,YOR363C,YPL082C,YPR070W
GO:0010648	negative regulation of cell communication	43	4	1.37	0.04638	0.755173	IRA1,BCY1,AVO1,IRA2	YBR140C,YIL033C,YOL078W,YOL081W
GO:0045991	carbon catabolite activation of transcription	26	3	0.83	0.04792	0.776532	GAL3,HAP1,PIP2	YDR009W,YLR256W,YOR363C
GO:0036267	invasive filamentous growth	63	5	2	0.04881	0.784456	GPR1,FLO11,MSS11,RGA1,SFL1	YDL035C,YIR019C,YMR164C,YOR127W,YOR140W
GO:0032774	RNA biosynthetic process	780	33	24.76	0.04887	0.784456	PDR3,GAL3,LYS14,TOM1,PHO4,PDR1,AFT1,GTS1,RIM101,RPI1,MET18,ASG1,TOR1,RGT1,NUP120,KTI12,ACE2,HAP1,ZDS2,MOT3,MSS11,PAH1,THO2,YAP7,HAL9,CTR9,ETT1,SFL1,ARP8,YRR1,PIP2,MOT1,MED1	YBL005W,YDR009W,YDR034C,YDR457W,YFR034C,YGL013C,YGL071W,YGL181W,YHL027W,YIL119C,YIL128W,YIL130W,YJR066W,YKL038W,YKL057C,YKL110C,YLR131C,YLR256W,YML109W,YMR070W,YMR164C,YMR165C,YNL139C,YOL028C,YOL089C,YOL145C,YOR051C,YOR140W,YOR141C,YOR162C,YOR363C,YPL082C,YPR070W
GO:0010556	regulation of macromolecule biosynthetic process	896	37	28.45	0.05133	0.820075	PDR3,DCC1,GAL3,LYS14,TOM1,PHO4,PDR1,AFT1,GTS1,RIM101,RPI1,ASG1,TOR1,RGT1,NUP120,KTI12,ACE2,TUB4,CDC123,HAP1,ZDS2,MOT3,MSS11,PAH1,NAM9,THO2,IPI3,YAP7,HAL9,CTR9,ETT1,SFL1,ARP8,YRR1,PIP2,MOT1,MED1	YBL005W,YCL016C,YDR009W,YDR034C,YDR457W,YFR034C,YGL013C,YGL071W,YGL181W,YHL027W,YIL119C,YIL130W,YJR066W,YKL038W,YKL057C,YKL110C,YLR131C,YLR212C,YLR215C,YLR256W,YML109W,YMR070W,YMR164C,YMR165C,YNL137C,YNL139C,YNL182C,YOL028C,YOL089C,YOL145C,YOR051C,YOR140W,YOR141C,YOR162C,YOR363C,YPL082C,YPR070W
GO:0006012	galactose metabolic process	12	2	0.38	0.05369	0.845866	GAL3,GAL2	YDR009W,YLR081W
GO:0006874	cellular calcium ion homeostasis	12	2	0.38	0.05369	0.845866	VCX1,PMR1	YDL128W,YGL167C
GO:0009113	purine nucleobase biosynthetic process	12	2	0.38	0.05369	0.845866	AAH1,ADE2	YNL141W,YOR128C
GO:0023051	regulation of signaling	130	8	4.13	0.05401	0.846986	IRA1,ROM1,BCY1,PEX1,TOR2,AVO1,IRA2,ETT1	YBR140C,YGR070W,YIL033C,YKL197C,YKL203C,YOL078W,YOL081W,YOR051C
GO:0031329	regulation of cellular catabolic process	86	6	2.73	0.05484	0.856057	CDC53,TOR1,TOR2,MSS11,UBP2,PIP2	YDL132W,YJR066W,YKL203C,YMR164C,YOR124C,YOR363C
GO:0009165	nucleotide biosynthetic process	109	7	3.46	0.05748	0.880202	IRA1,YEF1,BCY1,CYR1,IRA2,RAS1,ADE2	YBR140C,YEL041W,YIL033C,YJL005W,YOL081W,YOR101W,YOR128C
GO:0010562	positive regulation of phosphorus metabolic process	66	5	2.1	0.05758	0.880202	RPP1A,PHO4,BCY1,CTR9,RAS1	YDL081C,YFR034C,YIL033C,YOL145C,YOR101W
GO:0045937	positive regulation of phosphate metabolic process	66	5	2.1	0.05758	0.880202	RPP1A,PHO4,BCY1,CTR9,RAS1	YDL081C,YFR034C,YIL033C,YOL145C,YOR101W
GO:0015698	inorganic anion transport	28	3	0.89	0.05768	0.880202	PHO89,PHO84,SSU1	YBR296C,YML123C,YPL092W
GO:0072503	cellular divalent inorganic cation homeostasis	28	3	0.89	0.05768	0.880202	VCX1,PMR1,COT1	YDL128W,YGL167C,YOR316C
GO:0060255	regulation of macromolecule metabolic process	1137	45	36.1	0.05959	0.905289	PDR3,DCC1,RPP1A,CDC53,GAL3,LYS14,SCC2,TOM1,PHO4,PDR1,AFT1,GTS1,RIM101,BCY1,RPI1,ASG1,TOR1,RGT1,NUP120,KTI12,TOR2,ACE2,TUB4,CDC123,HAP1,ZDS2,MOT3,MSS11,PAH1,TCB2,NAM9,THO2,IPI3,YAP7,HAL9,PAP2,CTR9,ETT1,UBP2,SFL1,ARP8,YRR1,PIP2,MOT1,MED1	YBL005W,YCL016C,YDL081C,YDL132W,YDR009W,YDR034C,YDR180W,YDR457W,YFR034C,YGL013C,YGL071W,YGL181W,YHL027W,YIL033C,YIL119C,YIL130W,YJR066W,YKL038W,YKL057C,YKL110C,YKL203C,YLR131C,YLR212C,YLR215C,YLR256W,YML109W,YMR070W,YMR164C,YMR165C,YNL087W,YNL137C,YNL139C,YNL182C,YOL028C,YOL089C,YOL115W,YOL145C,YOR051C,YOR124C,YOR140W,YOR141C,YOR162C,YOR363C,YPL082C,YPR070W
GO:0035023	regulation of Rho protein signal transduction	13	2	0.41	0.06216	0.931852	ROM1,TOR2	YGR070W,YKL203C
GO:0048309	endoplasmic reticulum inheritance	13	2	0.41	0.06216	0.931852	SEC3,SEY1	YER008C,YOR165W
GO:0051055	negative regulation of lipid biosynthetic process	13	2	0.41	0.06216	0.931852	GTS1,MOT3	YGL181W,YMR070W
GO:0042221	response to chemical	495	22	15.72	0.06558	0.978177	PDR3,PCA1,GPR1,GAL3,PDR1,RIM101,ERC1,QDR1,MNL2,HAP1,ECM5,MLF3,IRA2,ATG19,AUS1,ETT1,RGA1,PDR5,YRR1,COT1,PIP2,GLR1	YBL005W,YBR295W,YDL035C,YDR009W,YGL013C,YHL027W,YHR032W,YIL120W,YLR057W,YLR256W,YMR176W,YNL074C,YOL081W,YOL082W,YOR011W,YOR051C,YOR127W,YOR153W,YOR162C,YOR316C,YOR363C,YPL091W
GO:0005984	disaccharide metabolic process	30	3	0.95	0.0683	0.978177	IMA1,MAL11,IMA2	YGR287C,YGR289C,YOL157C
GO:0006696	ergosterol biosynthetic process	30	3	0.95	0.0683	0.978177	ERG11,MOT3,ERG10	YHR007C,YMR070W,YPL028W
GO:0016129	phytosteroid biosynthetic process	30	3	0.95	0.0683	0.978177	ERG11,MOT3,ERG10	YHR007C,YMR070W,YPL028W
GO:0044108	cellular alcohol biosynthetic process	30	3	0.95	0.0683	0.978177	ERG11,MOT3,ERG10	YHR007C,YMR070W,YPL028W
GO:0097384	cellular lipid biosynthetic process	30	3	0.95	0.0683	0.978177	ERG11,MOT3,ERG10	YHR007C,YMR070W,YPL028W
GO:2000112	regulation of cellular macromolecule biosynthetic process	889	36	28.22	0.06872	0.978177	PDR3,DCC1,GAL3,LYS14,TOM1,PHO4,PDR1,AFT1,GTS1,RIM101,RPI1,ASG1,RGT1,NUP120,KTI12,ACE2,TUB4,CDC123,HAP1,ZDS2,MOT3,MSS11,PAH1,NAM9,THO2,IPI3,YAP7,HAL9,CTR9,ETT1,SFL1,ARP8,YRR1,PIP2,MOT1,MED1	YBL005W,YCL016C,YDR009W,YDR034C,YDR457W,YFR034C,YGL013C,YGL071W,YGL181W,YHL027W,YIL119C,YIL130W,YKL038W,YKL057C,YKL110C,YLR131C,YLR212C,YLR215C,YLR256W,YML109W,YMR070W,YMR164C,YMR165C,YNL137C,YNL139C,YNL182C,YOL028C,YOL089C,YOL145C,YOR051C,YOR140W,YOR141C,YOR162C,YOR363C,YPL082C,YPR070W
GO:0006635	fatty acid beta-oxidation	14	2	0.44	0.07104	0.978177	EHD3,PIP2	YDR036C,YOR363C
GO:0009225	nucleotide-sugar metabolic process	14	2	0.44	0.07104	0.978177	ALG7,PSA1	YBR243C,YDL055C
GO:0031532	actin cytoskeleton reorganization	14	2	0.44	0.07104	0.978177	TAO3,TOR2	YIL129C,YKL203C
GO:0045833	negative regulation of lipid metabolic process	14	2	0.44	0.07104	0.978177	GTS1,MOT3	YGL181W,YMR070W
GO:0000480	endonucleolytic cleavage in 5'-ETS of tricistronic rRNA transcript (SSU-rRNA, 5.8S rRNA, LSU-rRNA)	31	3	0.98	0.07392	0.978177	UTP20,TOM1,NOP9	YBL004W,YDR457W,YJL010C
GO:0006862	nucleotide transport	31	3	0.98	0.07392	0.978177	FLC2,RIM2,SAL1	YAL053W,YBR192W,YNL083W
GO:1902653	secondary alcohol biosynthetic process	31	3	0.98	0.07392	0.978177	ERG11,MOT3,ERG10	YHR007C,YMR070W,YPL028W
GO:0007062	sister chromatid cohesion	51	4	1.62	0.07749	0.978177	DCC1,RAD61,SCC2,AFT1	YCL016C,YDR014W,YDR180W,YGL071W
GO:0048584	positive regulation of response to stimulus	51	4	1.62	0.07749	0.978177	PDR3,PDR1,TOR2,ETT1	YBL005W,YGL013C,YKL203C,YOR051C
GO:0019693	ribose phosphate metabolic process	165	9	5.24	0.07854	0.978177	IRA1,QCR6,BCY1,CYR1,IRA2,ADH1,RAS1,CAT5,ADE2	YBR140C,YFR033C,YIL033C,YJL005W,YOL081W,YOL086C,YOR101W,YOR125C,YOR128C
GO:0000086	G2/M transition of mitotic cell cycle	32	3	1.02	0.07974	0.978177	CDC53,SFI1,ZDS2	YDL132W,YLL003W,YML109W
GO:0000472	endonucleolytic cleavage to generate mature 5'-end of SSU-rRNA from (SSU-rRNA, 5.8S rRNA, LSU-rRNA)	32	3	1.02	0.07974	0.978177	UTP20,TOM1,NOP9	YBL004W,YDR457W,YJL010C
GO:0007029	endoplasmic reticulum organization	32	3	1.02	0.07974	0.978177	SEC3,TCB2,SEY1	YER008C,YNL087W,YOR165W
GO:0010038	response to metal ion	32	3	1.02	0.07974	0.978177	PCA1,IRA2,COT1	YBR295W,YOL081W,YOR316C
GO:0016073	snRNA metabolic process	32	3	1.02	0.07974	0.978177	TOR1,TOR2,PAP2	YJR066W,YKL203C,YOL115W
GO:0031503	protein complex localization	32	3	1.02	0.07974	0.978177	SEC3,NUP120,ATG19	YER008C,YKL057C,YOL082W
GO:0044839	cell cycle G2/M phase transition	32	3	1.02	0.07974	0.978177	CDC53,SFI1,ZDS2	YDL132W,YLL003W,YML109W
GO:0019395	fatty acid oxidation	15	2	0.48	0.08031	0.978177	EHD3,PIP2	YDR036C,YOR363C
GO:0034087	establishment of mitotic sister chromatid cohesion	15	2	0.48	0.08031	0.978177	SCC2,AFT1	YDR180W,YGL071W
GO:0034440	lipid oxidation	15	2	0.48	0.08031	0.978177	EHD3,PIP2	YDR036C,YOR363C
GO:0046856	phosphatidylinositol dephosphorylation	15	2	0.48	0.08031	0.978177	TCB2,INP53	YNL087W,YOR109W
GO:1901989	positive regulation of cell cycle phase transition	15	2	0.48	0.08031	0.978177	CYS4,ZDS2	YGR155W,YML109W
GO:1901992	positive regulation of mitotic cell cycle phase transition	15	2	0.48	0.08031	0.978177	CYS4,ZDS2	YGR155W,YML109W
GO:0048585	negative regulation of response to stimulus	52	4	1.65	0.08196	0.978177	IRA1,BCY1,AVO1,IRA2	YBR140C,YIL033C,YOL078W,YOL081W
GO:1903008	organelle disassembly	52	4	1.65	0.08196	0.978177	YIL165C,LMO1,ATG39,WHI2	YIL165C,YLL007C,YLR312C,YOR043W
GO:0031669	cellular response to nutrient levels	119	7	3.78	0.08344	0.978177	GAL3,ENA1,PHO4,AFT1,HAP1,MEP2,PIP2	YDR009W,YDR040C,YFR034C,YGL071W,YLR256W,YNL142W,YOR363C
GO:0000967	rRNA 5'-end processing	33	3	1.05	0.08576	0.978177	UTP20,TOM1,NOP9	YBL004W,YDR457W,YJL010C
GO:0008204	ergosterol metabolic process	33	3	1.05	0.08576	0.978177	ERG11,MOT3,ERG10	YHR007C,YMR070W,YPL028W
GO:0009311	oligosaccharide metabolic process	33	3	1.05	0.08576	0.978177	IMA1,MAL11,IMA2	YGR287C,YGR289C,YOL157C
GO:0016128	phytosteroid metabolic process	33	3	1.05	0.08576	0.978177	ERG11,MOT3,ERG10	YHR007C,YMR070W,YPL028W
GO:0034471	ncRNA 5'-end processing	33	3	1.05	0.08576	0.978177	UTP20,TOM1,NOP9	YBL004W,YDR457W,YJL010C
GO:0043162	ubiquitin-dependent protein catabolic process via the multivesicular body sorting pathway	33	3	1.05	0.08576	0.978177	COS6,COS8,UBP2	YGR295C,YHL048W,YOR124C
GO:0051050	positive regulation of transport	33	3	1.05	0.08576	0.978177	AFT1,RHO3,TOR2	YGL071W,YIL118W,YKL203C
GO:1903047	mitotic cell cycle process	375	17	11.91	0.08576	0.978177	DCC1,CDC53,RAD61,SCC2,TOM1,AFT1,CYS4,RIM101,BIR1,SFI1,ACE2,TUB4,NKP2,ZDS2,END3,PAP2,CTR9	YCL016C,YDL132W,YDR014W,YDR180W,YDR457W,YGL071W,YGR155W,YHL027W,YJR089W,YLL003W,YLR131C,YLR212C,YLR315W,YML109W,YNL084C,YOL115W,YOL145C
GO:0006639	acylglycerol metabolic process	16	2	0.51	0.08992	0.978177	PAH1,TGL5	YMR165C,YOR081C
GO:0006641	triglyceride metabolic process	16	2	0.51	0.08992	0.978177	PAH1,TGL5	YMR165C,YOR081C
GO:0007010	cytoskeleton organization	246	12	7.81	0.09071	0.978177	MSP1,RHO3,TAO3,BIR1,TOR2,SFI1,TUB4,END3,SRV2,AVO1,WHI2,RGA1	YGR028W,YIL118W,YIL129C,YJR089W,YKL203C,YLL003W,YLR212C,YNL084C,YNL138W,YOL078W,YOR043W,YOR127W
GO:0000422	mitophagy	34	3	1.08	0.09196	0.978177	YIL165C,LMO1,WHI2	YIL165C,YLL007C,YOR043W
GO:0000429	carbon catabolite regulation of transcription from RNA polymerase II promoter	34	3	1.08	0.09196	0.978177	GAL3,HAP1,PIP2	YDR009W,YLR256W,YOR363C
GO:0000966	RNA 5'-end processing	34	3	1.08	0.09196	0.978177	UTP20,TOM1,NOP9	YBL004W,YDR457W,YJL010C
GO:0046890	regulation of lipid biosynthetic process	34	3	1.08	0.09196	0.978177	GTS1,TOR1,MOT3	YGL181W,YJR066W,YMR070W
GO:0061726	mitochondrion disassembly	34	3	1.08	0.09196	0.978177	YIL165C,LMO1,WHI2	YIL165C,YLL007C,YOR043W
GO:1902652	secondary alcohol metabolic process	34	3	1.08	0.09196	0.978177	ERG11,MOT3,ERG10	YHR007C,YMR070W,YPL028W
GO:0000122	negative regulation of transcription from RNA polymerase II promoter	146	8	4.64	0.09213	0.978177	AFT1,RIM101,RGT1,NUP120,HAP1,MOT3,SFL1,MED1	YGL071W,YHL027W,YKL038W,YKL057C,YLR256W,YMR070W,YOR140W,YPR070W
GO:0000416	positive regulation of histone H3-K36 methylation	3	1	0.1	0.09227	0.978177	CTR9	YOL145C
GO:0006556	S-adenosylmethionine biosynthetic process	3	1	0.1	0.09227	0.978177	ERC1	YHR032W
GO:0006741	NADP biosynthetic process	3	1	0.1	0.09227	0.978177	YEF1	YEL041W
GO:0006971	hypotonic response	3	1	0.1	0.09227	0.978177	FLC2	YAL053W
GO:0009298	GDP-mannose biosynthetic process	3	1	0.1	0.09227	0.978177	PSA1	YDL055C
GO:0009593	detection of chemical stimulus	3	1	0.1	0.09227	0.978177	GPR1	YDL035C
GO:0009730	detection of carbohydrate stimulus	3	1	0.1	0.09227	0.978177	GPR1	YDL035C
GO:0009732	detection of hexose stimulus	3	1	0.1	0.09227	0.978177	GPR1	YDL035C
GO:0010971	positive regulation of G2/M transition of mitotic cell cycle	3	1	0.1	0.09227	0.978177	ZDS2	YML109W
GO:0015691	cadmium ion transport	3	1	0.1	0.09227	0.978177	PCA1	YBR295W
GO:0015888	thiamine transport	3	1	0.1	0.09227	0.978177	NRT1	YOR071C
GO:0016320	endoplasmic reticulum membrane fusion	3	1	0.1	0.09227	0.978177	SEY1	YOR165W
GO:0019673	GDP-mannose metabolic process	3	1	0.1	0.09227	0.978177	PSA1	YDL055C
GO:0031998	regulation of fatty acid beta-oxidation	3	1	0.1	0.09227	0.978177	PIP2	YOR363C
GO:0032000	positive regulation of fatty acid beta-oxidation	3	1	0.1	0.09227	0.978177	PIP2	YOR363C
GO:0034059	response to anoxia	3	1	0.1	0.09227	0.978177	RIM101	YHL027W
GO:0034091	regulation of maintenance of sister chromatid cohesion	3	1	0.1	0.09227	0.978177	RAD61	YDR014W
GO:0034287	detection of monosaccharide stimulus	3	1	0.1	0.09227	0.978177	GPR1	YDL035C
GO:0036095	positive regulation of invasive growth in response to glucose limitation by positive regulation of transcription from RNA polymerase II prom...	3	1	0.1	0.09227	0.978177	MSS11	YMR164C
GO:0036281	coflocculation	3	1	0.1	0.09227	0.978177	FLO11	YIR019C
GO:0043096	purine nucleobase salvage	3	1	0.1	0.09227	0.978177	AAH1	YNL141W
GO:0046320	regulation of fatty acid oxidation	3	1	0.1	0.09227	0.978177	PIP2	YOR363C
GO:0046321	positive regulation of fatty acid oxidation	3	1	0.1	0.09227	0.978177	PIP2	YOR363C
GO:0048211	Golgi vesicle docking	3	1	0.1	0.09227	0.978177	USO1	YDL058W
GO:0051594	detection of glucose	3	1	0.1	0.09227	0.978177	GPR1	YDL035C
GO:0071044	histone mRNA catabolic process	3	1	0.1	0.09227	0.978177	PAP2	YOL115W
GO:0071050	snoRNA polyadenylation	3	1	0.1	0.09227	0.978177	PAP2	YOL115W
GO:0071454	cellular response to anoxia	3	1	0.1	0.09227	0.978177	RIM101	YHL027W
GO:0071476	cellular hypotonic response	3	1	0.1	0.09227	0.978177	FLC2	YAL053W
GO:0090604	surface biofilm formation	3	1	0.1	0.09227	0.978177	FLO11	YIR019C
GO:0090606	single-species surface biofilm formation	3	1	0.1	0.09227	0.978177	FLO11	YIR019C
GO:0097080	plasma membrane selenite transport	3	1	0.1	0.09227	0.978177	PHO84	YML123C
GO:0097198	histone H3-K36 trimethylation	3	1	0.1	0.09227	0.978177	CTR9	YOL145C
GO:0097201	negative regulation of transcription from RNA polymerase II promoter in response to stress	3	1	0.1	0.09227	0.978177	HAP1	YLR256W
GO:1900460	negative regulation of invasive growth in response to glucose limitation by negative regulation of transcription from RNA polymerase II prom...	3	1	0.1	0.09227	0.978177	SFL1	YOR140W
GO:1900461	positive regulation of pseudohyphal growth by positive regulation of transcription from RNA polymerase II promoter	3	1	0.1	0.09227	0.978177	MSS11	YMR164C
GO:1902751	positive regulation of cell cycle G2/M phase transition	3	1	0.1	0.09227	0.978177	ZDS2	YML109W
GO:1902931	negative regulation of alcohol biosynthetic process	3	1	0.1	0.09227	0.978177	MOT3	YMR070W
GO:1903088	5-amino-1-ribofuranosylimidazole-4-carboxamide transmembrane transport	3	1	0.1	0.09227	0.978177	NRT1	YOR071C
GO:1990414	replication-born double-strand break repair via sister chromatid exchange	3	1	0.1	0.09227	0.978177	SCC2	YDR180W
GO:2000284	positive regulation of cellular amino acid biosynthetic process	3	1	0.1	0.09227	0.978177	LYS14	YDR034C
GO:2001253	regulation of histone H3-K36 trimethylation	3	1	0.1	0.09227	0.978177	CTR9	YOL145C
GO:2001255	positive regulation of histone H3-K36 trimethylation	3	1	0.1	0.09227	0.978177	CTR9	YOL145C
GO:0036003	positive regulation of transcription from RNA polymerase II promoter in response to stress	35	3	1.11	0.09834	1	AFT1,MOT3,ETT1	YGL071W,YMR070W,YOR051C
GO:0042787	protein ubiquitination involved in ubiquitin-dependent protein catabolic process	35	3	1.11	0.09834	1	RAD16,CDC53,TOM1	YBR114W,YDL132W,YDR457W
GO:0042592	homeostatic process	329	15	10.45	0.09893	1	FLC2,PCA1,GPR1,VCX1,PMR1,HAL5,NFU1,FRE2,FRE1,MAM3,FRE7,UBP2,PDR5,COT1,GLR1	YAL053W,YBR295W,YDL035C,YDL128W,YGL167C,YJL165C,YKL040C,YKL220C,YLR214W,YOL060C,YOL152W,YOR124C,YOR153W,YOR316C,YPL091W
GO:0009117	nucleotide metabolic process	224	11	7.11	0.09899	1	IRA1,YEF1,QCR6,BCY1,CYR1,AAH1,IRA2,ADH1,RAS1,CAT5,ADE2	YBR140C,YEL041W,YFR033C,YIL033C,YJL005W,YNL141W,YOL081W,YOL086C,YOR101W,YOR125C,YOR128C
GO:0006283	transcription-coupled nucleotide-excision repair	17	2	0.54	0.09986	1	THO2,CTR9	YNL139C,YOL145C
GO:0006638	neutral lipid metabolic process	17	2	0.54	0.09986	1	PAH1,TGL5	YMR165C,YOR081C
GO:0009895	negative regulation of catabolic process	17	2	0.54	0.09986	1	TOR1,TOR2	YJR066W,YKL203C
GO:0031330	negative regulation of cellular catabolic process	17	2	0.54	0.09986	1	TOR1,TOR2	YJR066W,YKL203C
GO:0034085	establishment of sister chromatid cohesion	17	2	0.54	0.09986	1	SCC2,AFT1	YDR180W,YGL071W
GO:0009894	regulation of catabolic process	101	6	3.21	0.10104	1	CDC53,TOR1,TOR2,MSS11,UBP2,PIP2	YDL132W,YJR066W,YKL203C,YMR164C,YOR124C,YOR363C
GO:0006897	endocytosis	125	7	3.97	0.1018	1	SWH1,GTS1,APL1,TOR2,END3,WHI2,INP53	YAR042W,YGL181W,YJR005W,YKL203C,YNL084C,YOR043W,YOR109W
GO:0009966	regulation of signal transduction	125	7	3.97	0.1018	1	IRA1,ROM1,BCY1,TOR2,AVO1,IRA2,ETT1	YBR140C,YGR070W,YIL033C,YKL203C,YOL078W,YOL081W,YOR051C
GO:0031929	TOR signaling	36	3	1.14	0.10489	1	TOR1,TOR2,AVO1	YJR066W,YKL203C,YOL078W
GO:0044107	cellular alcohol metabolic process	36	3	1.14	0.10489	1	ERG11,MOT3,ERG10	YHR007C,YMR070W,YPL028W
GO:0046323	glucose import	36	3	1.14	0.10489	1	MAL11,RGT1,GAL2	YGR289C,YKL038W,YLR081W
GO:0031668	cellular response to extracellular stimulus	127	7	4.03	0.10837	1	GAL3,ENA1,PHO4,AFT1,HAP1,MEP2,PIP2	YDR009W,YDR040C,YFR034C,YGL071W,YLR256W,YNL142W,YOR363C
GO:0071496	cellular response to external stimulus	127	7	4.03	0.10837	1	GAL3,ENA1,PHO4,AFT1,HAP1,MEP2,PIP2	YDR009W,YDR040C,YFR034C,YGL071W,YLR256W,YNL142W,YOR363C
GO:0006284	base-excision repair	18	2	0.57	0.11008	1	APN1,PAP2	YKL114C,YOL115W
GO:0009268	response to pH	18	2	0.57	0.11008	1	ENA1,RIM101	YDR040C,YHL027W
GO:0046839	phospholipid dephosphorylation	18	2	0.57	0.11008	1	TCB2,INP53	YNL087W,YOR109W
GO:2000217	regulation of invasive growth in response to glucose limitation	18	2	0.57	0.11008	1	MSS11,SFL1	YMR164C,YOR140W
GO:0044712	single-organism catabolic process	335	15	10.64	0.11077	1	EHD3,IMA1,MAL11,YIL165C,LMO1,MNL2,ATG39,PAH1,AAH1,ATG19,ADH1,IMA2,WHI2,TGL5,PIP2	YDR036C,YGR287C,YGR289C,YIL165C,YLL007C,YLR057W,YLR312C,YMR165C,YNL141W,YOL082W,YOL086C,YOL157C,YOR043W,YOR081C,YOR363C
GO:0006753	nucleoside phosphate metabolic process	229	11	7.27	0.11101	1	IRA1,YEF1,QCR6,BCY1,CYR1,AAH1,IRA2,ADH1,RAS1,CAT5,ADE2	YBR140C,YEL041W,YFR033C,YIL033C,YJL005W,YNL141W,YOL081W,YOL086C,YOR101W,YOR125C,YOR128C
GO:0010563	negative regulation of phosphorus metabolic process	37	3	1.17	0.11162	1	IRA1,GTS1,IRA2	YBR140C,YGL181W,YOL081W
GO:0045936	negative regulation of phosphate metabolic process	37	3	1.17	0.11162	1	IRA1,GTS1,IRA2	YBR140C,YGL181W,YOL081W
GO:0031667	response to nutrient levels	128	7	4.06	0.11174	1	GAL3,ENA1,PHO4,AFT1,HAP1,MEP2,PIP2	YDR009W,YDR040C,YFR034C,YGL071W,YLR256W,YNL142W,YOR363C
GO:0070783	growth of unicellular organism as a thread of attached cells	104	6	3.3	0.11218	1	GPR1,FLO11,MSS11,MEP2,RGA1,SFL1	YDL035C,YIR019C,YMR164C,YNL142W,YOR127W,YOR140W
GO:0006629	lipid metabolic process	336	15	10.67	0.11282	1	ALG7,EHD3,MSS4,AFT1,GTS1,PHO81,ERG11,TOR1,MOT3,PAH1,TCB2,TGL5,INP53,PIP2,ERG10	YBR243C,YDR036C,YDR208W,YGL071W,YGL181W,YGR233C,YHR007C,YJR066W,YMR070W,YMR165C,YNL087W,YOR081C,YOR109W,YOR363C,YPL028W
GO:0044255	cellular lipid metabolic process	310	14	9.84	0.11478	1	ALG7,EHD3,MSS4,AFT1,GTS1,ERG11,TOR1,MOT3,PAH1,TCB2,TGL5,INP53,PIP2,ERG10	YBR243C,YDR036C,YDR208W,YGL071W,YGL181W,YHR007C,YJR066W,YMR070W,YMR165C,YNL087W,YOR081C,YOR109W,YOR363C,YPL028W
GO:0016042	lipid catabolic process	59	4	1.87	0.11667	1	EHD3,PAH1,TGL5,PIP2	YDR036C,YMR165C,YOR081C,YOR363C
GO:0046165	alcohol biosynthetic process	59	4	1.87	0.11667	1	ERG11,MOT3,ADH1,ERG10	YHR007C,YMR070W,YOL086C,YPL028W
GO:0000278	mitotic cell cycle	393	17	12.48	0.11796	1	DCC1,CDC53,RAD61,SCC2,TOM1,AFT1,CYS4,RIM101,BIR1,SFI1,ACE2,TUB4,NKP2,ZDS2,END3,PAP2,CTR9	YCL016C,YDL132W,YDR014W,YDR180W,YDR457W,YGL071W,YGR155W,YHL027W,YJR089W,YLL003W,YLR131C,YLR212C,YLR315W,YML109W,YNL084C,YOL115W,YOL145C
GO:0009272	fungal-type cell wall biogenesis	82	5	2.6	0.11842	1	FLC2,RIM101,RPI1,QDR1,END3	YAL053W,YHL027W,YIL119C,YIL120W,YNL084C
GO:0008645	hexose transport	38	3	1.21	0.1185	1	MAL11,RGT1,GAL2	YGR289C,YKL038W,YLR081W
GO:0015749	monosaccharide transport	38	3	1.21	0.1185	1	MAL11,RGT1,GAL2	YGR289C,YKL038W,YLR081W
GO:0015758	glucose transport	38	3	1.21	0.1185	1	MAL11,RGT1,GAL2	YGR289C,YKL038W,YLR081W
GO:0022406	membrane docking	38	3	1.21	0.1185	1	USO1,PEX5,SEC3	YDL058W,YDR244W,YER008C
GO:0031331	positive regulation of cellular catabolic process	38	3	1.21	0.1185	1	CDC53,MSS11,PIP2	YDL132W,YMR164C,YOR363C
GO:0046486	glycerolipid metabolic process	130	7	4.13	0.11864	1	MSS4,AFT1,GTS1,PAH1,TCB2,TGL5,INP53	YDR208W,YGL071W,YGL181W,YMR165C,YNL087W,YOR081C,YOR109W
GO:0000972	transcription-dependent tethering of RNA polymerase II gene DNA at nuclear periphery	19	2	0.6	0.12056	1	SCC2,NUP120	YDR180W,YKL057C
GO:0001522	pseudouridine synthesis	19	2	0.6	0.12056	1	TOR1,TOR2	YJR066W,YKL203C
GO:0042790	transcription of nuclear large rRNA transcript from RNA polymerase I promoter	19	2	0.6	0.12056	1	TOR1,MOT1	YJR066W,YPL082C
GO:2000220	regulation of pseudohyphal growth	19	2	0.6	0.12056	1	MSS11,SFL1	YMR164C,YOR140W
GO:0000101	sulfur amino acid transport	4	1	0.13	0.1211	1	MUP3	YHL036W
GO:0000431	regulation of transcription from RNA polymerase II promoter by galactose	4	1	0.13	0.1211	1	GAL3	YDR009W
GO:0000435	positive regulation of transcription from RNA polymerase II promoter by galactose	4	1	0.13	0.1211	1	GAL3	YDR009W
GO:0000715	nucleotide-excision repair, DNA damage recognition	4	1	0.13	0.1211	1	RAD16	YBR114W
GO:0001015	snoRNA transcription from an RNA polymerase II promoter	4	1	0.13	0.1211	1	CTR9	YOL145C
GO:0001927	exocyst assembly	4	1	0.13	0.1211	1	SEC3	YER008C
GO:0006880	intracellular sequestering of iron ion	4	1	0.13	0.1211	1	NFU1	YKL040C
GO:0008334	histone mRNA metabolic process	4	1	0.13	0.1211	1	PAP2	YOL115W
GO:0010511	regulation of phosphatidylinositol biosynthetic process	4	1	0.13	0.1211	1	GTS1	YGL181W
GO:0015855	pyrimidine nucleobase transport	4	1	0.13	0.1211	1	FUR4	YBR021W
GO:0015858	nucleoside transport	4	1	0.13	0.1211	1	NRT1	YOR071C
GO:0015883	FAD transport	4	1	0.13	0.1211	1	FLC2	YAL053W
GO:0016036	cellular response to phosphate starvation	4	1	0.13	0.1211	1	PHO4	YFR034C
GO:0019346	transsulfuration	4	1	0.13	0.1211	1	CYS4	YGR155W
GO:0030541	plasmid partitioning	4	1	0.13	0.1211	1	SCC2	YDR180W
GO:0042939	tripeptide transport	4	1	0.13	0.1211	1	PTR2	YKR093W
GO:0043090	amino acid import	4	1	0.13	0.1211	1	MUP3	YHL036W
GO:0043708	cell adhesion involved in biofilm formation	4	1	0.13	0.1211	1	FLO11	YIR019C
GO:0043709	cell adhesion involved in single-species biofilm formation	4	1	0.13	0.1211	1	FLO11	YIR019C
GO:0046084	adenine biosynthetic process	4	1	0.13	0.1211	1	ADE2	YOR128C
GO:0046113	nucleobase catabolic process	4	1	0.13	0.1211	1	AAH1	YNL141W
GO:0046618	drug export	4	1	0.13	0.1211	1	PDR5	YOR153W
GO:0046898	response to cycloheximide	4	1	0.13	0.1211	1	PDR5	YOR153W
GO:0050994	regulation of lipid catabolic process	4	1	0.13	0.1211	1	PIP2	YOR363C
GO:0050996	positive regulation of lipid catabolic process	4	1	0.13	0.1211	1	PIP2	YOR363C
GO:0051014	actin filament severing	4	1	0.13	0.1211	1	SRV2	YNL138W
GO:0051439	regulation of ubiquitin-protein ligase activity involved in mitotic cell cycle	4	1	0.13	0.1211	1	CDC53	YDL132W
GO:0051606	detection of stimulus	4	1	0.13	0.1211	1	GPR1	YDL035C
GO:0061421	positive regulation of transcription by oleic acid	4	1	0.13	0.1211	1	PIP2	YOR363C
GO:0061429	positive regulation of transcription from RNA polymerase II promoter by oleic acid	4	1	0.13	0.1211	1	PIP2	YOR363C
GO:0071619	phosphorylation of RNA polymerase II C-terminal domain serine 2 residues	4	1	0.13	0.1211	1	CTR9	YOL145C
GO:0072488	ammonium transmembrane transport	4	1	0.13	0.1211	1	MEP2	YNL142W
GO:0090605	submerged biofilm formation	4	1	0.13	0.1211	1	FLO11	YIR019C
GO:0090609	single-species submerged biofilm formation	4	1	0.13	0.1211	1	FLO11	YIR019C
GO:0090630	activation of GTPase activity	4	1	0.13	0.1211	1	ROM1	YGR070W
GO:0097577	sequestering of iron ion	4	1	0.13	0.1211	1	NFU1	YKL040C
GO:2000058	regulation of protein ubiquitination involved in ubiquitin-dependent protein catabolic process	4	1	0.13	0.1211	1	CDC53	YDL132W
GO:2001163	regulation of phosphorylation of RNA polymerase II C-terminal domain serine 2 residues	4	1	0.13	0.1211	1	CTR9	YOL145C
GO:2001165	positive regulation of phosphorylation of RNA polymerase II C-terminal domain serine 2 residues	4	1	0.13	0.1211	1	CTR9	YOL145C
GO:0010468	regulation of gene expression	939	36	29.81	0.1253	1	PDR3,GAL3,LYS14,SCC2,TOM1,PHO4,PDR1,AFT1,GTS1,RIM101,RPI1,ASG1,RGT1,NUP120,KTI12,ACE2,TUB4,CDC123,HAP1,ZDS2,MOT3,MSS11,PAH1,NAM9,THO2,YAP7,HAL9,PAP2,CTR9,ETT1,SFL1,ARP8,YRR1,PIP2,MOT1,MED1	YBL005W,YDR009W,YDR034C,YDR180W,YDR457W,YFR034C,YGL013C,YGL071W,YGL181W,YHL027W,YIL119C,YIL130W,YKL038W,YKL057C,YKL110C,YLR131C,YLR212C,YLR215C,YLR256W,YML109W,YMR070W,YMR164C,YMR165C,YNL137C,YNL139C,YOL028C,YOL089C,YOL115W,YOL145C,YOR051C,YOR140W,YOR141C,YOR162C,YOR363C,YPL082C,YPR070W
GO:0045990	carbon catabolite regulation of transcription	39	3	1.24	0.12554	1	GAL3,HAP1,PIP2	YDR009W,YLR256W,YOR363C
GO:0072329	monocarboxylic acid catabolic process	39	3	1.24	0.12554	1	EHD3,PAH1,PIP2	YDR036C,YMR165C,YOR363C
GO:0010646	regulation of cell communication	132	7	4.19	0.12577	1	IRA1,ROM1,BCY1,TOR2,AVO1,IRA2,ETT1	YBR140C,YGR070W,YIL033C,YKL203C,YOL078W,YOL081W,YOR051C
GO:0006887	exocytosis	61	4	1.94	0.12761	1	SWH1,SEC3,PMR1,RHO3	YAR042W,YER008C,YGL167C,YIL118W
GO:0045934	negative regulation of nucleobase-containing compound metabolic process	317	14	10.06	0.13062	1	IRA1,AFT1,RIM101,RGT1,NUP120,HAP1,ZDS2,MOT3,IRA2,PAP2,CTR9,SFL1,MOT1,MED1	YBR140C,YGL071W,YHL027W,YKL038W,YKL057C,YLR256W,YML109W,YMR070W,YOL081W,YOL115W,YOL145C,YOR140W,YPL082C,YPR070W
GO:0006144	purine nucleobase metabolic process	20	2	0.63	0.13127	1	AAH1,ADE2	YNL141W,YOR128C
GO:0030261	chromosome condensation	20	2	0.63	0.13127	1	RAD61,SCC2	YDR014W,YDR180W
GO:0016126	sterol biosynthetic process	40	3	1.27	0.13272	1	ERG11,MOT3,ERG10	YHR007C,YMR070W,YPL028W
GO:0030447	filamentous growth	134	7	4.25	0.1331	1	GPR1,MSB2,FLO11,MSS11,MEP2,RGA1,SFL1	YDL035C,YGR014W,YIR019C,YMR164C,YNL142W,YOR127W,YOR140W
GO:0006694	steroid biosynthetic process	41	3	1.3	0.14004	1	ERG11,MOT3,ERG10	YHR007C,YMR070W,YPL028W
GO:0045727	positive regulation of translation	41	3	1.3	0.14004	1	TUB4,CDC123,NAM9	YLR212C,YLR215C,YNL137C
GO:0042546	cell wall biogenesis	111	6	3.52	0.14046	1	FLC2,PSA1,RIM101,RPI1,QDR1,END3	YAL053W,YDL055C,YHL027W,YIL119C,YIL120W,YNL084C
GO:0044182	filamentous growth of a population of unicellular organisms	111	6	3.52	0.14046	1	GPR1,FLO11,MSS11,MEP2,RGA1,SFL1	YDL035C,YIR019C,YMR164C,YNL142W,YOR127W,YOR140W
GO:0009991	response to extracellular stimulus	136	7	4.32	0.14065	1	GAL3,ENA1,PHO4,AFT1,HAP1,MEP2,PIP2	YDR009W,YDR040C,YFR034C,YGL071W,YLR256W,YNL142W,YOR363C
GO:0007118	budding cell apical bud growth	21	2	0.67	0.1422	1	TAO3,RGA1	YIL129C,YOR127W
GO:0060260	regulation of transcription initiation from RNA polymerase II promoter	21	2	0.67	0.1422	1	CTR9,MOT1	YOL145C,YPL082C
GO:2000142	regulation of DNA-templated transcription, initiation	21	2	0.67	0.1422	1	CTR9,MOT1	YOL145C,YPL082C
GO:0000082	G1/S transition of mitotic cell cycle	64	4	2.03	0.14477	1	CDC53,CYS4,ACE2,CTR9	YDL132W,YGR155W,YLR131C,YOL145C
GO:0044843	cell cycle G1/S phase transition	64	4	2.03	0.14477	1	CDC53,CYS4,ACE2,CTR9	YDL132W,YGR155W,YLR131C,YOL145C
GO:0034250	positive regulation of cellular amide metabolic process	42	3	1.33	0.1475	1	TUB4,CDC123,NAM9	YLR212C,YLR215C,YNL137C
GO:0051345	positive regulation of hydrolase activity	42	3	1.33	0.1475	1	IRA1,ROM1,IRA2	YBR140C,YGR070W,YOL081W
GO:0000414	regulation of histone H3-K36 methylation	5	1	0.16	0.14903	1	CTR9	YOL145C
GO:0000501	flocculation via cell wall protein-carbohydrate interaction	5	1	0.16	0.14903	1	MSS11	YMR164C
GO:0006344	maintenance of chromatin silencing	5	1	0.16	0.14903	1	NUP120	YKL057C
GO:0007063	regulation of sister chromatid cohesion	5	1	0.16	0.14903	1	RAD61	YDR014W
GO:0007119	budding cell isotropic bud growth	5	1	0.16	0.14903	1	RGA1	YOR127W
GO:0007534	gene conversion at mating-type locus	5	1	0.16	0.14903	1	HO	YDL227C
GO:0009302	snoRNA transcription	5	1	0.16	0.14903	1	CTR9	YOL145C
GO:0015693	magnesium ion transport	5	1	0.16	0.14903	1	ALR1	YOL130W
GO:0016076	snRNA catabolic process	5	1	0.16	0.14903	1	PAP2	YOL115W
GO:0016077	snoRNA catabolic process	5	1	0.16	0.14903	1	PAP2	YOL115W
GO:0016562	protein import into peroxisome matrix, receptor recycling	5	1	0.16	0.14903	1	PEX1	YKL197C
GO:0019432	triglyceride biosynthetic process	5	1	0.16	0.14903	1	PAH1	YMR165C
GO:0033240	positive regulation of cellular amine metabolic process	5	1	0.16	0.14903	1	LYS14	YDR034C
GO:0035392	maintenance of chromatin silencing at telomere	5	1	0.16	0.14903	1	NUP120	YKL057C
GO:0043270	positive regulation of ion transport	5	1	0.16	0.14903	1	AFT1	YGL071W
GO:0045764	positive regulation of cellular amino acid metabolic process	5	1	0.16	0.14903	1	LYS14	YDR034C
GO:0045948	positive regulation of translational initiation	5	1	0.16	0.14903	1	CDC123	YLR215C
GO:0046460	neutral lipid biosynthetic process	5	1	0.16	0.14903	1	PAH1	YMR165C
GO:0046463	acylglycerol biosynthetic process	5	1	0.16	0.14903	1	PAH1	YMR165C
GO:0046579	positive regulation of Ras protein signal transduction	5	1	0.16	0.14903	1	TOR2	YKL203C
GO:0051057	positive regulation of small GTPase mediated signal transduction	5	1	0.16	0.14903	1	TOR2	YKL203C
GO:0051569	regulation of histone H3-K4 methylation	5	1	0.16	0.14903	1	CTR9	YOL145C
GO:0071036	nuclear polyadenylation-dependent snoRNA catabolic process	5	1	0.16	0.14903	1	PAP2	YOL115W
GO:0071037	nuclear polyadenylation-dependent snRNA catabolic process	5	1	0.16	0.14903	1	PAP2	YOL115W
GO:0071041	antisense RNA transcript catabolic process	5	1	0.16	0.14903	1	PAP2	YOL115W
GO:0090338	positive regulation of formin-nucleated actin cable assembly	5	1	0.16	0.14903	1	RHO3	YIL118W
GO:0098609	cell-cell adhesion	5	1	0.16	0.14903	1	FLO11	YIR019C
GO:1901654	response to ketone	5	1	0.16	0.14903	1	PDR5	YOR153W
GO:1904668	positive regulation of ubiquitin protein ligase activity	5	1	0.16	0.14903	1	CDC53	YDL132W
GO:2000282	regulation of cellular amino acid biosynthetic process	5	1	0.16	0.14903	1	LYS14	YDR034C
GO:2001173	regulation of histone H2B conserved C-terminal lysine ubiquitination	5	1	0.16	0.14903	1	CTR9	YOL145C
GO:0019637	organophosphate metabolic process	408	17	12.95	0.14973	1	IRA1,MSS4,YEF1,QCR6,AFT1,GTS1,BCY1,CYR1,PAH1,TCB2,AAH1,IRA2,ADH1,RAS1,INP53,CAT5,ADE2	YBR140C,YDR208W,YEL041W,YFR033C,YGL071W,YGL181W,YIL033C,YJL005W,YMR165C,YNL087W,YNL141W,YOL081W,YOL086C,YOR101W,YOR109W,YOR125C,YOR128C
GO:0009267	cellular response to starvation	65	4	2.06	0.15069	1	ENA1,PHO4,AFT1,MEP2	YDR040C,YFR034C,YGL071W,YNL142W
GO:0044763	single-organism cellular process	2759	95	87.59	0.15189	1	SWH1,IRA1,ALG7,PCA1,DCC1,GPR1,PSA1,USO1,VCX1,CDC53,HO,RAD61,LYS14,EHD3,SCC2,MSS4,PEX5,TOM1,YEF1,SEC3,QCR6,AFT1,PMR1,GTS1,KEX1,MSB2,MSP1,CYS4,IMA1,MAL11,RIM101,ERG11,BCY1,HIS5,RHO3,QDR1,TAO3,YIL165C,FLO11,CYR1,HAL5,TOR1,BIR1,NFU1,NUP120,KTI12,PEX1,MNN4,TOR2,FRE2,SFI1,LMO1,MNL2,ACE2,TUB4,FRE1,CDC123,HAP1,ATG39,NKP2,ZDS2,PHO84,MOT3,MSS11,PAH1,END3,TCB2,SRV2,AAH1,MEP2,IPI3,MAM3,AVO1,IRA2,ATG19,ADH1,P…	YAR042W,YBR140C,YBR243C,YBR295W,YCL016C,YDL035C,YDL055C,YDL058W,YDL128W,YDL132W,YDL227C,YDR014W,YDR034C,YDR036C,YDR180W,YDR208W,YDR244W,YDR457W,YEL041W,YER008C,YFR033C,YGL071W,YGL167C,YGL181W,YGL203C,YGR014W,YGR028W,YGR155W,YGR287C,YGR289C,YHL027W,YHR007C,YIL033C,YIL116W,YIL118W,YIL120W,YIL129C,YIL165C,YIR019C,YJL005W,YJL165C,YJR066W,YJR089W,YKL040C,YKL057C,YKL110C,YKL197C,YKL201C,YKL203C,YKL220C…
GO:0044765	single-organism transport	608	24	19.3	0.15267	1	FLC2,SWH1,FUR4,RIM2,USO1,PEX5,GNP1,SEC3,PMR1,MAL11,MUP3,ERC1,RHO3,QDR1,RGT1,NUP120,PEX1,GAL2,SAL1,RPS19A,AUS1,NRT1,PDR5,SSU1	YAL053W,YAR042W,YBR021W,YBR192W,YDL058W,YDR244W,YDR508C,YER008C,YGL167C,YGR289C,YHL036W,YHR032W,YIL118W,YIL120W,YKL038W,YKL057C,YKL197C,YLR081W,YNL083W,YOL121C,YOR011W,YOR071C,YOR153W,YPL092W
GO:0016558	protein import into peroxisome matrix	22	2	0.7	0.15331	1	PEX5,PEX1	YDR244W,YKL197C
GO:0043328	protein targeting to vacuole involved in ubiquitin-dependent protein catabolic process via the multivesicular body sorting pathway	22	2	0.7	0.15331	1	COS6,COS8	YGR295C,YHL048W
GO:0043632	modification-dependent macromolecule catabolic process	245	11	7.78	0.15485	1	RAD16,CDC53,TOM1,SCL1,COS6,COS8,UBA1,MNL2,ATG19,PAP2,UBP2	YBR114W,YDL132W,YDR457W,YGL011C,YGR295C,YHL048W,YKL210W,YLR057W,YOL082W,YOL115W,YOR124C
GO:0000447	endonucleolytic cleavage in ITS1 to separate SSU-rRNA from 5.8S rRNA and LSU-rRNA from tricistronic rRNA transcript (SSU-rRNA, 5.8S rRNA, LS...	43	3	1.37	0.15509	1	UTP20,TOM1,NOP9	YBL004W,YDR457W,YJL010C
GO:0009896	positive regulation of catabolic process	43	3	1.37	0.15509	1	CDC53,MSS11,PIP2	YDL132W,YMR164C,YOR363C
GO:0044248	cellular catabolic process	759	29	24.1	0.16388	1	SWH1,RAD16,CDC53,EHD3,TRS23,TOM1,SCL1,PMR1,IMA1,MAL11,COS6,COS8,YIL165C,TOR1,TOR2,UBA1,LMO1,MNL2,ATG39,MSS11,PAH1,AAH1,ATG19,ADH1,PAP2,IMA2,WHI2,UBP2,PIP2	YAR042W,YBR114W,YDL132W,YDR036C,YDR246W,YDR457W,YGL011C,YGL167C,YGR287C,YGR289C,YGR295C,YHL048W,YIL165C,YJR066W,YKL203C,YKL210W,YLL007C,YLR057W,YLR312C,YMR164C,YMR165C,YNL141W,YOL082W,YOL086C,YOL115W,YOL157C,YOR043W,YOR124C,YOR363C
GO:0006793	phosphorus metabolic process	730	28	23.18	0.16421	1	IRA1,ALG7,RPP1A,GAL3,MSS4,YEF1,YFH7,QCR6,PHO4,AFT1,GTS1,PHO81,BCY1,CYR1,HAL5,TOR1,TOR2,PHO84,PAH1,TCB2,AAH1,IRA2,ADH1,CTR9,RAS1,INP53,CAT5,ADE2	YBR140C,YBR243C,YDL081C,YDR009W,YDR208W,YEL041W,YFR007W,YFR033C,YFR034C,YGL071W,YGL181W,YGR233C,YIL033C,YJL005W,YJL165C,YJR066W,YKL203C,YML123C,YMR165C,YNL087W,YNL141W,YOL081W,YOL086C,YOL145C,YOR101W,YOR109W,YOR125C,YOR128C
GO:0009605	response to external stimulus	142	7	4.51	0.16448	1	GAL3,ENA1,PHO4,AFT1,HAP1,MEP2,PIP2	YDR009W,YDR040C,YFR034C,YGL071W,YLR256W,YNL142W,YOR363C
GO:0006749	glutathione metabolic process	23	2	0.73	0.16458	1	GTO1,GLR1	YGR154C,YPL091W
GO:0007266	Rho protein signal transduction	23	2	0.73	0.16458	1	ROM1,TOR2	YGR070W,YKL203C
GO:0043900	regulation of multi-organism process	23	2	0.73	0.16458	1	MSS11,SFL1	YMR164C,YOR140W
GO:0046112	nucleobase biosynthetic process	23	2	0.73	0.16458	1	AAH1,ADE2	YNL141W,YOR128C
GO:1903725	regulation of phospholipid metabolic process	23	2	0.73	0.16458	1	GTS1,TCB2	YGL181W,YNL087W
GO:0006511	ubiquitin-dependent protein catabolic process	222	10	7.05	0.1672	1	RAD16,CDC53,TOM1,SCL1,COS6,COS8,UBA1,MNL2,ATG19,UBP2	YBR114W,YDL132W,YDR457W,YGL011C,YGR295C,YHL048W,YKL210W,YLR057W,YOL082W,YOR124C
GO:0019941	modification-dependent protein catabolic process	223	10	7.08	0.17051	1	RAD16,CDC53,TOM1,SCL1,COS6,COS8,UBA1,MNL2,ATG19,UBP2	YBR114W,YDL132W,YDR457W,YGL011C,YGR295C,YHL048W,YKL210W,YLR057W,YOL082W,YOR124C
GO:0007051	spindle organization	45	3	1.43	0.17061	1	BIR1,SFI1,TUB4	YJR089W,YLL003W,YLR212C
GO:0044242	cellular lipid catabolic process	45	3	1.43	0.17061	1	EHD3,PAH1,PIP2	YDR036C,YMR165C,YOR363C
GO:0070887	cellular response to chemical stimulus	361	15	11.46	0.17148	1	PDR3,GPR1,GAL3,PDR1,RIM101,HAP1,ECM5,IRA2,AUS1,ETT1,RGA1,PDR5,YRR1,PIP2,GLR1	YBL005W,YDL035C,YDR009W,YGL013C,YHL027W,YLR256W,YMR176W,YOL081W,YOR011W,YOR051C,YOR127W,YOR153W,YOR162C,YOR363C,YPL091W
GO:0032270	positive regulation of cellular protein metabolic process	118	6	3.75	0.17171	1	RPP1A,CDC53,TUB4,CDC123,NAM9,CTR9	YDL081C,YDL132W,YLR212C,YLR215C,YNL137C,YOL145C
GO:0031324	negative regulation of cellular metabolic process	418	17	13.27	0.17332	1	IRA1,AFT1,GTS1,RIM101,TOR1,RGT1,NUP120,TOR2,HAP1,ZDS2,MOT3,IRA2,PAP2,CTR9,SFL1,MOT1,MED1	YBR140C,YGL071W,YGL181W,YHL027W,YJR066W,YKL038W,YKL057C,YKL203C,YLR256W,YML109W,YMR070W,YOL081W,YOL115W,YOL145C,YOR140W,YPL082C,YPR070W
GO:0051336	regulation of hydrolase activity	69	4	2.19	0.17523	1	IRA1,ROM1,TOR2,IRA2	YBR140C,YGR070W,YKL203C,YOL081W
GO:0006625	protein targeting to peroxisome	24	2	0.76	0.17599	1	PEX5,PEX1	YDR244W,YKL197C
GO:0031396	regulation of protein ubiquitination	24	2	0.76	0.17599	1	CDC53,CTR9	YDL132W,YOL145C
GO:0043574	peroxisomal transport	24	2	0.76	0.17599	1	PEX5,PEX1	YDR244W,YKL197C
GO:0072662	protein localization to peroxisome	24	2	0.76	0.17599	1	PEX5,PEX1	YDR244W,YKL197C
GO:0072663	establishment of protein localization to peroxisome	24	2	0.76	0.17599	1	PEX5,PEX1	YDR244W,YKL197C
GO:0001881	receptor recycling	6	1	0.19	0.17607	1	PEX1	YKL197C
GO:0007232	osmosensory signaling pathway via Sho1 osmosensor	6	1	0.19	0.17607	1	MSB2	YGR014W
GO:0010043	response to zinc ion	6	1	0.19	0.17607	1	COT1	YOR316C
GO:0010452	histone H3-K36 methylation	6	1	0.19	0.17607	1	CTR9	YOL145C
GO:0016560	protein import into peroxisome matrix, docking	6	1	0.19	0.17607	1	PEX5	YDR244W
GO:0019218	regulation of steroid metabolic process	6	1	0.19	0.17607	1	MOT3	YMR070W
GO:0022615	protein to membrane docking	6	1	0.19	0.17607	1	PEX5	YDR244W
GO:0031062	positive regulation of histone methylation	6	1	0.19	0.17607	1	CTR9	YOL145C
GO:0031589	cell-substrate adhesion	6	1	0.19	0.17607	1	FLO11	YIR019C
GO:0031930	mitochondria-nucleus signaling pathway	6	1	0.19	0.17607	1	TOR1	YJR066W
GO:0032119	sequestering of zinc ion	6	1	0.19	0.17607	1	COT1	YOR316C
GO:0032233	positive regulation of actin filament bundle assembly	6	1	0.19	0.17607	1	RHO3	YIL118W
GO:0032443	regulation of ergosterol biosynthetic process	6	1	0.19	0.17607	1	MOT3	YMR070W
GO:0032456	endocytic recycling	6	1	0.19	0.17607	1	RTT10	YPL183C
GO:0035435	phosphate ion transmembrane transport	6	1	0.19	0.17607	1	PHO89	YBR296C
GO:0042710	biofilm formation	6	1	0.19	0.17607	1	FLO11	YIR019C
GO:0043629	ncRNA polyadenylation	6	1	0.19	0.17607	1	PAP2	YOL115W
GO:0043902	positive regulation of multi-organism process	6	1	0.19	0.17607	1	MSS11	YMR164C
GO:0044010	single-species biofilm formation	6	1	0.19	0.17607	1	FLO11	YIR019C
GO:0045923	positive regulation of fatty acid metabolic process	6	1	0.19	0.17607	1	PIP2	YOR363C
GO:0050810	regulation of steroid biosynthetic process	6	1	0.19	0.17607	1	MOT3	YMR070W
GO:0051443	positive regulation of ubiquitin-protein transferase activity	6	1	0.19	0.17607	1	CDC53	YDL132W
GO:0051601	exocyst localization	6	1	0.19	0.17607	1	SEC3	YER008C
GO:0061088	regulation of sequestering of zinc ion	6	1	0.19	0.17607	1	COT1	YOR316C
GO:0070588	calcium ion transmembrane transport	6	1	0.19	0.17607	1	PMR1	YGL167C
GO:0070813	hydrogen sulfide metabolic process	6	1	0.19	0.17607	1	CYS4	YGR155W
GO:0070814	hydrogen sulfide biosynthetic process	6	1	0.19	0.17607	1	CYS4	YGR155W
GO:0071894	histone H2B conserved C-terminal lysine ubiquitination	6	1	0.19	0.17607	1	CTR9	YOL145C
GO:0090158	endoplasmic reticulum membrane organization	6	1	0.19	0.17607	1	TCB2	YNL087W
GO:0098679	regulation of carbohydrate catabolic process by regulation of transcription from RNA polymerase II promoter	6	1	0.19	0.17607	1	MSS11	YMR164C
GO:1903052	positive regulation of proteolysis involved in cellular protein catabolic process	6	1	0.19	0.17607	1	CDC53	YDL132W
GO:1903364	positive regulation of cellular protein catabolic process	6	1	0.19	0.17607	1	CDC53	YDL132W
GO:2000021	regulation of ion homeostasis	6	1	0.19	0.17607	1	COT1	YOR316C
GO:2000218	negative regulation of invasive growth in response to glucose limitation	6	1	0.19	0.17607	1	SFL1	YOR140W
GO:2000765	regulation of cytoplasmic translation	6	1	0.19	0.17607	1	TUB4	YLR212C
GO:2001166	regulation of histone H2B ubiquitination	6	1	0.19	0.17607	1	CTR9	YOL145C
GO:0055086	nucleobase-containing small molecule metabolic process	252	11	8	0.17648	1	IRA1,YEF1,QCR6,BCY1,CYR1,AAH1,IRA2,ADH1,RAS1,CAT5,ADE2	YBR140C,YEL041W,YFR033C,YIL033C,YJL005W,YNL141W,YOL081W,YOL086C,YOR101W,YOR125C,YOR128C
GO:0050790	regulation of catalytic activity	172	8	5.46	0.17976	1	IRA1,RPP1A,CDC53,ROM1,BCY1,TOR2,IRA2,RAS1	YBR140C,YDL081C,YDL132W,YGR070W,YIL033C,YKL203C,YOL081W,YOR101W
GO:1902578	single-organism localization	651	25	20.67	0.18036	1	FLC2,SWH1,FUR4,RIM2,USO1,PEX5,GNP1,SEC3,PMR1,MAL11,MUP3,ERC1,RHO3,QDR1,RGT1,NFU1,NUP120,PEX1,GAL2,SAL1,RPS19A,AUS1,NRT1,PDR5,SSU1	YAL053W,YAR042W,YBR021W,YBR192W,YDL058W,YDR244W,YDR508C,YER008C,YGL167C,YGR289C,YHL036W,YHR032W,YIL118W,YIL120W,YKL038W,YKL040C,YKL057C,YKL197C,YLR081W,YNL083W,YOL121C,YOR011W,YOR071C,YOR153W,YPL092W
GO:0032940	secretion by cell	70	4	2.22	0.18158	1	SWH1,SEC3,PMR1,RHO3	YAR042W,YER008C,YGL167C,YIL118W
GO:0046903	secretion	70	4	2.22	0.18158	1	SWH1,SEC3,PMR1,RHO3	YAR042W,YER008C,YGL167C,YIL118W
GO:0098656	anion transmembrane transport	70	4	2.22	0.18158	1	PHO89,GNP1,MUP3,PHO84	YBR296C,YDR508C,YHL036W,YML123C
GO:0045333	cellular respiration	95	5	3.02	0.18333	1	ALG7,QCR6,HAP1,PAH1,CAT5	YBR243C,YFR033C,YLR256W,YMR165C,YOR125C
GO:0048523	negative regulation of cellular process	566	22	17.97	0.18469	1	IRA1,RAD61,AFT1,GTS1,RIM101,BCY1,TOR1,BIR1,RGT1,NUP120,TOR2,CDC123,HAP1,ZDS2,MOT3,AVO1,IRA2,PAP2,CTR9,SFL1,MOT1,MED1	YBR140C,YDR014W,YGL071W,YGL181W,YHL027W,YIL033C,YJR066W,YJR089W,YKL038W,YKL057C,YKL203C,YLR215C,YLR256W,YML109W,YMR070W,YOL078W,YOL081W,YOL115W,YOL145C,YOR140W,YPL082C,YPR070W
GO:0051247	positive regulation of protein metabolic process	121	6	3.84	0.18593	1	RPP1A,CDC53,TUB4,CDC123,NAM9,CTR9	YDL081C,YDL132W,YLR212C,YLR215C,YNL137C,YOL145C
GO:0010565	regulation of cellular ketone metabolic process	25	2	0.79	0.18752	1	LYS14,PIP2	YDR034C,YOR363C
GO:0045931	positive regulation of mitotic cell cycle	25	2	0.79	0.18752	1	CYS4,ZDS2	YGR155W,YML109W
GO:0006974	cellular response to DNA damage stimulus	339	14	10.76	0.18796	1	RAD16,DCC1,SCC2,MET18,TOR1,NUP120,APN1,TOR2,UBA1,MKT1,THO2,PAP2,CTR9,ARP8	YBR114W,YCL016C,YDR180W,YIL128W,YJR066W,YKL057C,YKL114C,YKL203C,YKL210W,YNL085W,YNL139C,YOL115W,YOL145C,YOR141C
GO:0046488	phosphatidylinositol metabolic process	72	4	2.29	0.19448	1	MSS4,GTS1,TCB2,INP53	YDR208W,YGL181W,YNL087W,YOR109W
GO:1901137	carbohydrate derivative biosynthetic process	230	10	7.3	0.19455	1	IRA1,ALG7,PSA1,BCY1,CYR1,MNN4,MNL2,IRA2,RAS1,ADE2	YBR140C,YBR243C,YDL055C,YIL033C,YJL005W,YKL201C,YLR057W,YOL081W,YOR101W,YOR128C
GO:0015931	nucleobase-containing compound transport	203	9	6.44	0.19565	1	FLC2,RIM2,TOM1,NOP9,NUP120,SAL1,THO2,RPS19A,NRT1	YAL053W,YBR192W,YDR457W,YJL010C,YKL057C,YNL083W,YNL139C,YOL121C,YOR071C
GO:1903050	regulation of proteolysis involved in cellular protein catabolic process	26	2	0.83	0.19916	1	CDC53,UBP2	YDL132W,YOR124C
GO:1903362	regulation of cellular protein catabolic process	26	2	0.83	0.19916	1	CDC53,UBP2	YDL132W,YOR124C
GO:0006066	alcohol metabolic process	98	5	3.11	0.19989	1	ALG7,ERG11,MOT3,ADH1,ERG10	YBR243C,YHR007C,YMR070W,YOL086C,YPL028W
GO:0006047	UDP-N-acetylglucosamine metabolic process	7	1	0.22	0.20225	1	ALG7	YBR243C
GO:0007089	traversing start control point of mitotic cell cycle	7	1	0.22	0.20225	1	CYS4	YGR155W
GO:0010389	regulation of G2/M transition of mitotic cell cycle	7	1	0.22	0.20225	1	ZDS2	YML109W
GO:0019655	glycolytic fermentation to ethanol	7	1	0.22	0.20225	1	ADH1	YOL086C
GO:0019660	glycolytic fermentation	7	1	0.22	0.20225	1	ADH1	YOL086C
GO:0030026	cellular manganese ion homeostasis	7	1	0.22	0.20225	1	MAM3	YOL060C
GO:0033182	regulation of histone ubiquitination	7	1	0.22	0.20225	1	CTR9	YOL145C
GO:0042938	dipeptide transport	7	1	0.22	0.20225	1	PTR2	YKR093W
GO:0043457	regulation of cellular respiration	7	1	0.22	0.20225	1	HAP1	YLR256W
GO:0045116	protein neddylation	7	1	0.22	0.20225	1	UBA3	YPR066W
GO:0050667	homocysteine metabolic process	7	1	0.22	0.20225	1	CYS4	YGR155W
GO:0051781	positive regulation of cell division	7	1	0.22	0.20225	1	ACE2	YLR131C
GO:0055071	manganese ion homeostasis	7	1	0.22	0.20225	1	MAM3	YOL060C
GO:0060304	regulation of phosphatidylinositol dephosphorylation	7	1	0.22	0.20225	1	TCB2	YNL087W
GO:0070058	tRNA gene clustering	7	1	0.22	0.20225	1	SCC2	YDR180W
GO:0090262	regulation of transcription-coupled nucleotide-excision repair	7	1	0.22	0.20225	1	CTR9	YOL145C
GO:1902749	regulation of cell cycle G2/M phase transition	7	1	0.22	0.20225	1	ZDS2	YML109W
GO:2000222	positive regulation of pseudohyphal growth	7	1	0.22	0.20225	1	MSS11	YMR164C
GO:2000819	regulation of nucleotide-excision repair	7	1	0.22	0.20225	1	CTR9	YOL145C
GO:2001207	regulation of transcription elongation from RNA polymerase I promoter	7	1	0.22	0.20225	1	CTR9	YOL145C
GO:2001209	positive regulation of transcription elongation from RNA polymerase I promoter	7	1	0.22	0.20225	1	CTR9	YOL145C
GO:0042594	response to starvation	74	4	2.35	0.20766	1	ENA1,PHO4,AFT1,MEP2	YDR040C,YFR034C,YGL071W,YNL142W
GO:0000083	regulation of transcription involved in G1/S transition of mitotic cell cycle	27	2	0.86	0.21088	1	ACE2,CTR9	YLR131C,YOL145C
GO:0031670	cellular response to nutrient	50	3	1.59	0.21115	1	GAL3,HAP1,PIP2	YDR009W,YLR256W,YOR363C
GO:0006790	sulfur compound metabolic process	153	7	4.86	0.21243	1	GTO1,CYS4,ERC1,MET18,NFU1,NAR1,GLR1	YGR154C,YGR155W,YHR032W,YIL128W,YKL040C,YNL240C,YPL091W
GO:0006281	DNA repair	291	12	9.24	0.21311	1	RAD16,SCC2,MET18,TOR1,NUP120,APN1,TOR2,MKT1,THO2,PAP2,CTR9,ARP8	YBR114W,YDR180W,YIL128W,YJR066W,YKL057C,YKL114C,YKL203C,YNL085W,YNL139C,YOL115W,YOL145C,YOR141C
GO:0008643	carbohydrate transport	51	3	1.62	0.2195	1	MAL11,RGT1,GAL2	YGR289C,YKL038W,YLR081W
GO:0044710	single-organism metabolic process	1420	50	45.08	0.21972	1	IRA1,ALG7,PSA1,GAL3,LYS14,EHD3,MSS4,YEF1,QCR6,AFT1,GTS1,GTO1,CYS4,PHO81,IMA1,MAL11,ERG11,BCY1,HIS5,YIL165C,CYR1,TOR1,RGT1,MNN4,FRE2,LMO1,MNL2,GAL2,FRE1,HAP1,ATG39,PHO84,MOT3,PAH1,TCB2,AAH1,IRA2,ATG19,ADH1,FRE7,IMA2,WHI2,TGL5,RAS1,INP53,CAT5,ADE2,PIP2,ERG10,GLR1	YBR140C,YBR243C,YDL055C,YDR009W,YDR034C,YDR036C,YDR208W,YEL041W,YFR033C,YGL071W,YGL181W,YGR154C,YGR155W,YGR233C,YGR287C,YGR289C,YHR007C,YIL033C,YIL116W,YIL165C,YJL005W,YJR066W,YKL038W,YKL201C,YKL220C,YLL007C,YLR057W,YLR081W,YLR214W,YLR256W,YLR312C,YML123C,YMR070W,YMR165C,YNL087W,YNL141W,YOL081W,YOL082W,YOL086C,YOL152W,YOL157C,YOR043W,YOR081C,YOR101W,YOR109W,YOR125C,YOR128C,YOR363C,YPL028W,YPL091W
GO:0007067	mitotic nuclear division	237	10	7.52	0.22	1	DCC1,RAD61,SCC2,TOM1,AFT1,BIR1,SFI1,TUB4,NKP2,PAP2	YCL016C,YDR014W,YDR180W,YDR457W,YGL071W,YJR089W,YLL003W,YLR212C,YLR315W,YOL115W
GO:0071554	cell wall organization or biogenesis	265	11	8.41	0.22021	1	FLC2,PSA1,EXG2,RIM101,ECM34,RPI1,QDR1,TOR1,ECM5,END3,AVO1	YAL053W,YDL055C,YDR261C,YHL027W,YHL043W,YIL119C,YIL120W,YJR066W,YMR176W,YNL084C,YOL078W
GO:0022904	respiratory electron transport chain	28	2	0.89	0.22266	1	QCR6,CAT5	YFR033C,YOR125C
GO:0034629	cellular protein complex localization	28	2	0.89	0.22266	1	SEC3,NUP120	YER008C,YKL057C
GO:0042773	ATP synthesis coupled electron transport	28	2	0.89	0.22266	1	QCR6,CAT5	YFR033C,YOR125C
GO:0042775	mitochondrial ATP synthesis coupled electron transport	28	2	0.89	0.22266	1	QCR6,CAT5	YFR033C,YOR125C
GO:0009890	negative regulation of biosynthetic process	351	14	11.14	0.22368	1	IRA1,AFT1,GTS1,RIM101,RGT1,NUP120,HAP1,ZDS2,MOT3,IRA2,CTR9,SFL1,MOT1,MED1	YBR140C,YGL071W,YGL181W,YHL027W,YKL038W,YKL057C,YLR256W,YML109W,YMR070W,YOL081W,YOL145C,YOR140W,YPL082C,YPR070W
GO:0031327	negative regulation of cellular biosynthetic process	351	14	11.14	0.22368	1	IRA1,AFT1,GTS1,RIM101,RGT1,NUP120,HAP1,ZDS2,MOT3,IRA2,CTR9,SFL1,MOT1,MED1	YBR140C,YGL071W,YGL181W,YHL027W,YKL038W,YKL057C,YLR256W,YML109W,YMR070W,YOL081W,YOL145C,YOR140W,YPL082C,YPR070W
GO:0006796	phosphate-containing compound metabolic process	701	26	22.26	0.22456	1	IRA1,RPP1A,GAL3,MSS4,YEF1,YFH7,QCR6,PHO4,AFT1,GTS1,PHO81,BCY1,CYR1,HAL5,TOR1,TOR2,PAH1,TCB2,AAH1,IRA2,ADH1,CTR9,RAS1,INP53,CAT5,ADE2	YBR140C,YDL081C,YDR009W,YDR208W,YEL041W,YFR007W,YFR033C,YFR034C,YGL071W,YGL181W,YGR233C,YIL033C,YJL005W,YJL165C,YJR066W,YKL203C,YMR165C,YNL087W,YNL141W,YOL081W,YOL086C,YOL145C,YOR101W,YOR109W,YOR125C,YOR128C
GO:0000409	regulation of transcription by galactose	8	1	0.25	0.22761	1	GAL3	YDR009W
GO:0000411	positive regulation of transcription by galactose	8	1	0.25	0.22761	1	GAL3	YDR009W
GO:0006573	valine metabolic process	8	1	0.25	0.22761	1	EHD3	YDR036C
GO:0007050	cell cycle arrest	8	1	0.25	0.22761	1	CDC123	YLR215C
GO:0009226	nucleotide-sugar biosynthetic process	8	1	0.25	0.22761	1	PSA1	YDL055C
GO:0009409	response to cold	8	1	0.25	0.22761	1	IRA2	YOL081W
GO:0010446	response to alkaline pH	8	1	0.25	0.22761	1	RIM101	YHL027W
GO:0017157	regulation of exocytosis	8	1	0.25	0.22761	1	RHO3	YIL118W
GO:0030307	positive regulation of cell growth	8	1	0.25	0.22761	1	MSS11	YMR164C
GO:0030308	negative regulation of cell growth	8	1	0.25	0.22761	1	SFL1	YOR140W
GO:0034389	lipid particle organization	8	1	0.25	0.22761	1	PAH1	YMR165C
GO:0043901	negative regulation of multi-organism process	8	1	0.25	0.22761	1	SFL1	YOR140W
GO:0045862	positive regulation of proteolysis	8	1	0.25	0.22761	1	CDC53	YDL132W
GO:0046500	S-adenosylmethionine metabolic process	8	1	0.25	0.22761	1	ERC1	YHR032W
GO:0046677	response to antibiotic	8	1	0.25	0.22761	1	PDR5	YOR153W
GO:0051046	regulation of secretion	8	1	0.25	0.22761	1	RHO3	YIL118W
GO:0070417	cellular response to cold	8	1	0.25	0.22761	1	IRA2	YOL081W
GO:0071031	nuclear mRNA surveillance of mRNA 3'-end processing	8	1	0.25	0.22761	1	PAP2	YOL115W
GO:0071072	negative regulation of phospholipid biosynthetic process	8	1	0.25	0.22761	1	GTS1	YGL181W
GO:0071469	cellular response to alkaline pH	8	1	0.25	0.22761	1	RIM101	YHL027W
GO:0072523	purine-containing compound catabolic process	8	1	0.25	0.22761	1	AAH1	YNL141W
GO:0090522	vesicle tethering involved in exocytosis	8	1	0.25	0.22761	1	SEC3	YER008C
GO:1900087	positive regulation of G1/S transition of mitotic cell cycle	8	1	0.25	0.22761	1	CYS4	YGR155W
GO:1901409	positive regulation of phosphorylation of RNA polymerase II C-terminal domain	8	1	0.25	0.22761	1	CTR9	YOL145C
GO:1902808	positive regulation of cell cycle G1/S phase transition	8	1	0.25	0.22761	1	CYS4	YGR155W
GO:1903530	regulation of secretion by cell	8	1	0.25	0.22761	1	RHO3	YIL118W
GO:1903726	negative regulation of phospholipid metabolic process	8	1	0.25	0.22761	1	GTS1	YGL181W
GO:1904666	regulation of ubiquitin protein ligase activity	8	1	0.25	0.22761	1	CDC53	YDL132W
GO:2000221	negative regulation of pseudohyphal growth	8	1	0.25	0.22761	1	SFL1	YOR140W
GO:0006486	protein glycosylation	77	4	2.44	0.2279	1	ALG7,PSA1,MNN4,MNL2	YBR243C,YDL055C,YKL201C,YLR057W
GO:0043413	macromolecule glycosylation	77	4	2.44	0.2279	1	ALG7,PSA1,MNN4,MNL2	YBR243C,YDL055C,YKL201C,YLR057W
GO:0007584	response to nutrient	52	3	1.65	0.22792	1	GAL3,HAP1,PIP2	YDR009W,YLR256W,YOR363C
GO:0016125	sterol metabolic process	52	3	1.65	0.22792	1	ERG11,MOT3,ERG10	YHR007C,YMR070W,YPL028W
GO:0009056	catabolic process	852	31	27.05	0.22966	1	SWH1,RAD16,CDC53,EHD3,TRS23,TOM1,SCL1,PMR1,IMA1,MAL11,COS6,COS8,CIC1,YIL165C,TOR1,TOR2,UBA1,LMO1,MNL2,ATG39,MSS11,PAH1,AAH1,ATG19,ADH1,PAP2,IMA2,WHI2,TGL5,UBP2,PIP2	YAR042W,YBR114W,YDL132W,YDR036C,YDR246W,YDR457W,YGL011C,YGL167C,YGR287C,YGR289C,YGR295C,YHL048W,YHR052W,YIL165C,YJR066W,YKL203C,YKL210W,YLL007C,YLR057W,YLR312C,YMR164C,YMR165C,YNL141W,YOL082W,YOL086C,YOL115W,YOL157C,YOR043W,YOR081C,YOR124C,YOR363C
GO:0051172	negative regulation of nitrogen compound metabolic process	353	14	11.21	0.2299	1	IRA1,AFT1,RIM101,RGT1,NUP120,HAP1,ZDS2,MOT3,IRA2,PAP2,CTR9,SFL1,MOT1,MED1	YBR140C,YGL071W,YHL027W,YKL038W,YKL057C,YLR256W,YML109W,YMR070W,YOL081W,YOL115W,YOL145C,YOR140W,YPL082C,YPR070W
GO:0090407	organophosphate biosynthetic process	240	10	7.62	0.2313	1	IRA1,YEF1,GTS1,BCY1,CYR1,PAH1,AAH1,IRA2,RAS1,ADE2	YBR140C,YEL041W,YGL181W,YIL033C,YJL005W,YMR165C,YNL141W,YOL081W,YOR101W,YOR128C
GO:0031126	snoRNA 3'-end processing	29	2	0.92	0.23449	1	PAP2,CTR9	YOL115W,YOL145C
GO:0009266	response to temperature stimulus	78	4	2.48	0.23476	1	NUP120,PSR1,IRA2,WHI2	YKL057C,YLL010C,YOL081W,YOR043W
GO:0070085	glycosylation	78	4	2.48	0.23476	1	ALG7,PSA1,MNN4,MNL2	YBR243C,YDL055C,YKL201C,YLR057W
GO:0008202	steroid metabolic process	53	3	1.68	0.2364	1	ERG11,MOT3,ERG10	YHR007C,YMR070W,YPL028W
GO:0044271	cellular nitrogen compound biosynthetic process	1464	51	46.48	0.24252	1	PDR3,IRA1,PSA1,RPP1A,RPL41B,GAL3,LYS14,RSM10,TOM1,YEF1,PHO4,PDR1,AFT1,GTS1,RIM101,BCY1,RPI1,MET18,ASG1,CYR1,TOR1,YAE1,RGT1,NUP120,KTI12,ACE2,TUB4,CDC123,HAP1,RPL26A,ZDS2,MOT3,MSS11,PAH1,NAM9,THO2,AAH1,YAP7,IRA2,HAL9,RPS19A,CTR9,ETT1,RAS1,ADE2,SFL1,ARP8,YRR1,PIP2,MOT1,MED1	YBL005W,YBR140C,YDL055C,YDL081C,YDL133C-A,YDR009W,YDR034C,YDR041W,YDR457W,YEL041W,YFR034C,YGL013C,YGL071W,YGL181W,YHL027W,YIL033C,YIL119C,YIL128W,YIL130W,YJL005W,YJR066W,YJR067C,YKL038W,YKL057C,YKL110C,YLR131C,YLR212C,YLR215C,YLR256W,YLR344W,YML109W,YMR070W,YMR164C,YMR165C,YNL137C,YNL139C,YNL141W,YOL028C,YOL081W,YOL089C,YOL121C,YOL145C,YOR051C,YOR101W,YOR128C,YOR140W,YOR141C,YOR162C,YOR363C,YPL08…
GO:0051603	proteolysis involved in cellular protein catabolic process	243	10	7.71	0.24282	1	RAD16,CDC53,TOM1,SCL1,COS6,COS8,UBA1,MNL2,ATG19,UBP2	YBR114W,YDL132W,YDR457W,YGL011C,YGR295C,YHL048W,YKL210W,YLR057W,YOL082W,YOR124C
GO:0010506	regulation of autophagy	30	2	0.95	0.24637	1	TOR1,TOR2	YJR066W,YKL203C
GO:0019674	NAD metabolic process	30	2	0.95	0.24637	1	YEF1,ADH1	YEL041W,YOL086C
GO:0006820	anion transport	188	8	5.97	0.24701	1	FLC2,PHO89,GNP1,MUP3,YIL166C,PHO84,SAL1,SSU1	YAL053W,YBR296C,YDR508C,YHL036W,YIL166C,YML123C,YNL083W,YPL092W
GO:1901617	organic hydroxy compound biosynthetic process	80	4	2.54	0.24861	1	ERG11,MOT3,ADH1,ERG10	YHR007C,YMR070W,YOL086C,YPL028W
GO:0065009	regulation of molecular function	189	8	6	0.25147	1	IRA1,RPP1A,CDC53,ROM1,BCY1,TOR2,IRA2,RAS1	YBR140C,YDL081C,YDL132W,YGR070W,YIL033C,YKL203C,YOL081W,YOR101W
GO:0000448	cleavage in ITS2 between 5.8S rRNA and LSU-rRNA of tricistronic rRNA transcript (SSU-rRNA, 5.8S rRNA, LSU-rRNA)	9	1	0.29	0.25217	1	TOM1	YDR457W
GO:0006189	'de novo' IMP biosynthetic process	9	1	0.29	0.25217	1	ADE2	YOR128C
GO:0009756	carbohydrate mediated signaling	9	1	0.29	0.25217	1	GPR1	YDL035C
GO:0009757	hexose mediated signaling	9	1	0.29	0.25217	1	GPR1	YDL035C
GO:0010182	sugar mediated signaling pathway	9	1	0.29	0.25217	1	GPR1	YDL035C
GO:0010255	glucose mediated signaling pathway	9	1	0.29	0.25217	1	GPR1	YDL035C
GO:0016093	polyprenol metabolic process	9	1	0.29	0.25217	1	ALG7	YBR243C
GO:0018023	peptidyl-lysine trimethylation	9	1	0.29	0.25217	1	CTR9	YOL145C
GO:0019348	dolichol metabolic process	9	1	0.29	0.25217	1	ALG7	YBR243C
GO:0031060	regulation of histone methylation	9	1	0.29	0.25217	1	CTR9	YOL145C
GO:0031081	nuclear pore distribution	9	1	0.29	0.25217	1	NUP120	YKL057C
GO:0033523	histone H2B ubiquitination	9	1	0.29	0.25217	1	CTR9	YOL145C
GO:0035822	gene conversion	9	1	0.29	0.25217	1	HO	YDL227C
GO:0042868	antisense RNA metabolic process	9	1	0.29	0.25217	1	PAP2	YOL115W
GO:0043112	receptor metabolic process	9	1	0.29	0.25217	1	PEX1	YKL197C
GO:0043471	regulation of cellular carbohydrate catabolic process	9	1	0.29	0.25217	1	MSS11	YMR164C
GO:0043619	regulation of transcription from RNA polymerase II promoter in response to oxidative stress	9	1	0.29	0.25217	1	YRR1	YOR162C
GO:0045117	azole transport	9	1	0.29	0.25217	1	NRT1	YOR071C
GO:0045903	positive regulation of translational fidelity	9	1	0.29	0.25217	1	NAM9	YNL137C
GO:0048280	vesicle fusion with Golgi apparatus	9	1	0.29	0.25217	1	USO1	YDL058W
GO:0051180	vitamin transport	9	1	0.29	0.25217	1	NRT1	YOR071C
GO:0051664	nuclear pore localization	9	1	0.29	0.25217	1	NUP120	YKL057C
GO:0061393	positive regulation of transcription from RNA polymerase II promoter in response to osmotic stress	9	1	0.29	0.25217	1	MOT3	YMR070W
GO:0061709	reticulophagy	9	1	0.29	0.25217	1	ATG39	YLR312C
GO:0070550	rDNA condensation	9	1	0.29	0.25217	1	SCC2	YDR180W
GO:0071248	cellular response to metal ion	9	1	0.29	0.25217	1	IRA2	YOL081W
GO:0090153	regulation of sphingolipid biosynthetic process	9	1	0.29	0.25217	1	TOR1	YJR066W
GO:0090337	regulation of formin-nucleated actin cable assembly	9	1	0.29	0.25217	1	RHO3	YIL118W
GO:1905038	regulation of membrane lipid metabolic process	9	1	0.29	0.25217	1	TOR1	YJR066W
GO:0051188	cofactor biosynthetic process	134	6	4.25	0.25225	1	YEF1,ERC1,MET18,NFU1,NAR1,CAT5	YEL041W,YHR032W,YIL128W,YKL040C,YNL240C,YOR125C
GO:0000478	endonucleolytic cleavage involved in rRNA processing	55	3	1.75	0.25353	1	UTP20,TOM1,NOP9	YBL004W,YDR457W,YJL010C
GO:0000479	endonucleolytic cleavage of tricistronic rRNA transcript (SSU-rRNA, 5.8S rRNA, LSU-rRNA)	55	3	1.75	0.25353	1	UTP20,TOM1,NOP9	YBL004W,YDR457W,YJL010C
GO:0042180	cellular ketone metabolic process	55	3	1.75	0.25353	1	LYS14,CAT5,PIP2	YDR034C,YOR125C,YOR363C
GO:0009101	glycoprotein biosynthetic process	81	4	2.57	0.25561	1	ALG7,PSA1,MNN4,MNL2	YBR243C,YDL055C,YKL201C,YLR057W
GO:0030010	establishment of cell polarity	81	4	2.57	0.25561	1	MSB2,ZDS2,END3,RGA1	YGR014W,YML109W,YNL084C,YOR127W
GO:0071852	fungal-type cell wall organization or biogenesis	190	8	6.03	0.25596	1	FLC2,EXG2,RIM101,RPI1,QDR1,TOR1,END3,AVO1	YAL053W,YDR261C,YHL027W,YIL119C,YIL120W,YJR066W,YNL084C,YOL078W
GO:0006119	oxidative phosphorylation	31	2	0.98	0.25826	1	QCR6,CAT5	YFR033C,YOR125C
GO:0009967	positive regulation of signal transduction	31	2	0.98	0.25826	1	TOR2,ETT1	YKL203C,YOR051C
GO:0022900	electron transport chain	31	2	0.98	0.25826	1	QCR6,CAT5	YFR033C,YOR125C
GO:0023056	positive regulation of signaling	31	2	0.98	0.25826	1	TOR2,ETT1	YKL203C,YOR051C
GO:0046148	pigment biosynthetic process	31	2	0.98	0.25826	1	AAH1,ADE2	YNL141W,YOR128C
GO:0048278	vesicle docking	31	2	0.98	0.25826	1	USO1,SEC3	YDL058W,YER008C
GO:0032989	cellular component morphogenesis	108	5	3.43	0.25838	1	MSS4,QDR1,TAO3,END3,SRV2	YDR208W,YIL120W,YIL129C,YNL084C,YNL138W
GO:0045892	negative regulation of transcription, DNA-templated	276	11	8.76	0.26034	1	AFT1,RIM101,RGT1,NUP120,HAP1,ZDS2,MOT3,CTR9,SFL1,MOT1,MED1	YGL071W,YHL027W,YKL038W,YKL057C,YLR256W,YML109W,YMR070W,YOL145C,YOR140W,YPL082C,YPR070W
GO:1902679	negative regulation of RNA biosynthetic process	276	11	8.76	0.26034	1	AFT1,RIM101,RGT1,NUP120,HAP1,ZDS2,MOT3,CTR9,SFL1,MOT1,MED1	YGL071W,YHL027W,YKL038W,YKL057C,YLR256W,YML109W,YMR070W,YOL145C,YOR140W,YPL082C,YPR070W
GO:1903507	negative regulation of nucleic acid-templated transcription	276	11	8.76	0.26034	1	AFT1,RIM101,RGT1,NUP120,HAP1,ZDS2,MOT3,CTR9,SFL1,MOT1,MED1	YGL071W,YHL027W,YKL038W,YKL057C,YLR256W,YML109W,YMR070W,YOL145C,YOR140W,YPL082C,YPR070W
GO:0051235	maintenance of location	56	3	1.78	0.26215	1	GAL3,NFU1,COT1	YDR009W,YKL040C,YOR316C
GO:0044770	cell cycle phase transition	164	7	5.21	0.26486	1	CDC53,CYS4,BIR1,SFI1,ACE2,ZDS2,CTR9	YDL132W,YGR155W,YJR089W,YLL003W,YLR131C,YML109W,YOL145C
GO:0044772	mitotic cell cycle phase transition	164	7	5.21	0.26486	1	CDC53,CYS4,BIR1,SFI1,ACE2,ZDS2,CTR9	YDL132W,YGR155W,YJR089W,YLL003W,YLR131C,YML109W,YOL145C
GO:0030163	protein catabolic process	278	11	8.83	0.2679	1	RAD16,CDC53,TOM1,SCL1,COS6,COS8,CIC1,UBA1,MNL2,ATG19,UBP2	YBR114W,YDL132W,YDR457W,YGL011C,YGR295C,YHL048W,YHR052W,YKL210W,YLR057W,YOL082W,YOR124C
GO:0042254	ribosome biogenesis	394	15	12.51	0.26817	1	UTP20,LSM6,TOM1,CIC1,NOP9,TOR1,YAE1,NUP120,TOR2,DRS1,RPL26A,KRE33,IPI3,RPS19A,MOT1	YBL004W,YDR378C,YDR457W,YHR052W,YJL010C,YJR066W,YJR067C,YKL057C,YKL203C,YLL008W,YLR344W,YNL132W,YNL182C,YOL121C,YPL082C
GO:0009303	rRNA transcription	32	2	1.02	0.27016	1	TOR1,MOT1	YJR066W,YPL082C
GO:0035428	hexose transmembrane transport	32	2	1.02	0.27016	1	MAL11,GAL2	YGR289C,YLR081W
GO:0042440	pigment metabolic process	32	2	1.02	0.27016	1	AAH1,ADE2	YNL141W,YOR128C
GO:0070784	regulation of growth of unicellular organism as a thread of attached cells	32	2	1.02	0.27016	1	MSS11,SFL1	YMR164C,YOR140W
GO:1905950	monosaccharide transmembrane transport	32	2	1.02	0.27016	1	MAL11,GAL2	YGR289C,YLR081W
GO:0051253	negative regulation of RNA metabolic process	279	11	8.86	0.27171	1	AFT1,RIM101,RGT1,NUP120,HAP1,ZDS2,MOT3,CTR9,SFL1,MOT1,MED1	YGL071W,YHL027W,YKL038W,YKL057C,YLR256W,YML109W,YMR070W,YOL145C,YOR140W,YPL082C,YPR070W
GO:0032879	regulation of localization	138	6	4.38	0.2739	1	AFT1,RHO3,RGT1,TOR2,ZDS2,COT1	YGL071W,YIL118W,YKL038W,YKL203C,YML109W,YOR316C
GO:0000105	histidine biosynthetic process	10	1	0.32	0.27594	1	HIS5	YIL116W
GO:0000947	amino acid catabolic process to alcohol via Ehrlich pathway	10	1	0.32	0.27594	1	ADH1	YOL086C
GO:0006116	NADH oxidation	10	1	0.32	0.27594	1	ADH1	YOL086C
GO:0006362	transcription elongation from RNA polymerase I promoter	10	1	0.32	0.27594	1	CTR9	YOL145C
GO:0006491	N-glycan processing	10	1	0.32	0.27594	1	MNL2	YLR057W
GO:0006547	histidine metabolic process	10	1	0.32	0.27594	1	HIS5	YIL116W
GO:0009092	homoserine metabolic process	10	1	0.32	0.27594	1	CYS4	YGR155W
GO:0009251	glucan catabolic process	10	1	0.32	0.27594	1	MSS11	YMR164C
GO:0014070	response to organic cyclic compound	10	1	0.32	0.27594	1	PDR5	YOR153W
GO:0019217	regulation of fatty acid metabolic process	10	1	0.32	0.27594	1	PIP2	YOR363C
GO:0031134	sister chromatid biorientation	10	1	0.32	0.27594	1	BIR1	YJR089W
GO:0031398	positive regulation of protein ubiquitination	10	1	0.32	0.27594	1	CDC53	YDL132W
GO:0046834	lipid phosphorylation	10	1	0.32	0.27594	1	MSS4	YDR208W
GO:0046854	phosphatidylinositol phosphorylation	10	1	0.32	0.27594	1	MSS4	YDR208W
GO:0051182	coenzyme transport	10	1	0.32	0.27594	1	FLC2	YAL053W
GO:0052803	imidazole-containing compound metabolic process	10	1	0.32	0.27594	1	HIS5	YIL116W
GO:0061392	regulation of transcription from RNA polymerase II promoter in response to osmotic stress	10	1	0.32	0.27594	1	MOT3	YMR070W
GO:0071039	nuclear polyadenylation-dependent CUT catabolic process	10	1	0.32	0.27594	1	PAP2	YOL115W
GO:0071326	cellular response to monosaccharide stimulus	10	1	0.32	0.27594	1	GPR1	YDL035C
GO:0071331	cellular response to hexose stimulus	10	1	0.32	0.27594	1	GPR1	YDL035C
GO:0071333	cellular response to glucose stimulus	10	1	0.32	0.27594	1	GPR1	YDL035C
GO:0071467	cellular response to pH	10	1	0.32	0.27594	1	RIM101	YHL027W
GO:1901407	regulation of phosphorylation of RNA polymerase II C-terminal domain	10	1	0.32	0.27594	1	CTR9	YOL145C
GO:1902930	regulation of alcohol biosynthetic process	10	1	0.32	0.27594	1	MOT3	YMR070W
GO:2000219	positive regulation of invasive growth in response to glucose limitation	10	1	0.32	0.27594	1	MSS11	YMR164C
GO:0009451	RNA modification	111	5	3.52	0.27669	1	TOR1,KTI12,TOR2,KRE33,PAP2	YJR066W,YKL110C,YKL203C,YNL132W,YOL115W
GO:0019318	hexose metabolic process	84	4	2.67	0.27682	1	GAL3,RGT1,GAL2,ADH1	YDR009W,YKL038W,YLR081W,YOL086C
GO:0006289	nucleotide-excision repair	58	3	1.84	0.27952	1	RAD16,THO2,CTR9	YBR114W,YNL139C,YOL145C
GO:0098781	ncRNA transcription	58	3	1.84	0.27952	1	TOR1,CTR9,MOT1	YJR066W,YOL145C,YPL082C
GO:0015918	sterol transport	33	2	1.05	0.28206	1	SWH1,AUS1	YAR042W,YOR011W
GO:0042274	ribosomal small subunit biogenesis	140	6	4.44	0.2849	1	UTP20,LSM6,TOM1,NOP9,KRE33,RPS19A	YBL004W,YDR378C,YDR457W,YJL010C,YNL132W,YOL121C
GO:0006413	translational initiation	59	3	1.87	0.28824	1	TOR1,YAE1,CDC123	YJR066W,YJR067C,YLR215C
GO:0007114	cell budding	59	3	1.87	0.28824	1	TAO3,END3,RGA1	YIL129C,YNL084C,YOR127W
GO:0019954	asexual reproduction	59	3	1.87	0.28824	1	TAO3,END3,RGA1	YIL129C,YNL084C,YOR127W
GO:0034219	carbohydrate transmembrane transport	34	2	1.08	0.29394	1	MAL11,GAL2	YGR289C,YLR081W
GO:1903320	regulation of protein modification by small protein conjugation or removal	34	2	1.08	0.29394	1	CDC53,CTR9	YDL132W,YOL145C
GO:0009126	purine nucleoside monophosphate metabolic process	114	5	3.62	0.29527	1	QCR6,AAH1,ADH1,CAT5,ADE2	YFR033C,YNL141W,YOL086C,YOR125C,YOR128C
GO:0009167	purine ribonucleoside monophosphate metabolic process	114	5	3.62	0.29527	1	QCR6,AAH1,ADH1,CAT5,ADE2	YFR033C,YNL141W,YOL086C,YOR125C,YOR128C
GO:0042273	ribosomal large subunit biogenesis	114	5	3.62	0.29527	1	TOM1,YAE1,DRS1,RPL26A,IPI3	YDR457W,YJR067C,YLL008W,YLR344W,YNL182C
GO:0016054	organic acid catabolic process	87	4	2.76	0.29831	1	EHD3,PAH1,ADH1,PIP2	YDR036C,YMR165C,YOL086C,YOR363C
GO:0046395	carboxylic acid catabolic process	87	4	2.76	0.29831	1	EHD3,PAH1,ADH1,PIP2	YDR036C,YMR165C,YOL086C,YOR363C
GO:0000955	amino acid catabolic process via Ehrlich pathway	11	1	0.35	0.29897	1	ADH1	YOL086C
GO:0006188	IMP biosynthetic process	11	1	0.35	0.29897	1	ADE2	YOR128C
GO:0006563	L-serine metabolic process	11	1	0.35	0.29897	1	CYS4	YGR155W
GO:0007076	mitotic chromosome condensation	11	1	0.35	0.29897	1	SCC2	YDR180W
GO:0009083	branched-chain amino acid catabolic process	11	1	0.35	0.29897	1	EHD3	YDR036C
GO:0010676	positive regulation of cellular carbohydrate metabolic process	11	1	0.35	0.29897	1	MSS11	YMR164C
GO:0019878	lysine biosynthetic process via aminoadipic acid	11	1	0.35	0.29897	1	LYS14	YDR034C
GO:0030472	mitotic spindle organization in nucleus	11	1	0.35	0.29897	1	TUB4	YLR212C
GO:0031990	mRNA export from nucleus in response to heat stress	11	1	0.35	0.29897	1	NUP120	YKL057C
GO:0032231	regulation of actin filament bundle assembly	11	1	0.35	0.29897	1	RHO3	YIL118W
GO:0035493	SNARE complex assembly	11	1	0.35	0.29897	1	USO1	YDL058W
GO:0035753	maintenance of DNA trinucleotide repeats	11	1	0.35	0.29897	1	DCC1	YCL016C
GO:0042149	cellular response to glucose starvation	11	1	0.35	0.29897	1	ENA1	YDR040C
GO:0043101	purine-containing compound salvage	11	1	0.35	0.29897	1	AAH1	YNL141W
GO:0044247	cellular polysaccharide catabolic process	11	1	0.35	0.29897	1	MSS11	YMR164C
GO:0045732	positive regulation of protein catabolic process	11	1	0.35	0.29897	1	CDC53	YDL132W
GO:0046835	carbohydrate phosphorylation	11	1	0.35	0.29897	1	GAL3	YDR009W
GO:0051438	regulation of ubiquitin-protein transferase activity	11	1	0.35	0.29897	1	CDC53	YDL132W
GO:0070785	negative regulation of growth of unicellular organism as a thread of attached cells	11	1	0.35	0.29897	1	SFL1	YOR140W
GO:0071241	cellular response to inorganic substance	11	1	0.35	0.29897	1	IRA2	YOL081W
GO:0071322	cellular response to carbohydrate stimulus	11	1	0.35	0.29897	1	GPR1	YDL035C
GO:0071474	cellular hyperosmotic response	11	1	0.35	0.29897	1	MOT3	YMR070W
GO:0071577	zinc II ion transmembrane transport	11	1	0.35	0.29897	1	COT1	YOR316C
GO:0009100	glycoprotein metabolic process	88	4	2.79	0.30553	1	ALG7,PSA1,MNN4,MNL2	YBR243C,YDL055C,YKL201C,YLR057W
GO:0003333	amino acid transmembrane transport	35	2	1.11	0.30579	1	GNP1,MUP3	YDR508C,YHL036W
GO:0007117	budding cell bud growth	35	2	1.11	0.30579	1	TAO3,RGA1	YIL129C,YOR127W
GO:0042176	regulation of protein catabolic process	35	2	1.11	0.30579	1	CDC53,UBP2	YDL132W,YOR124C
GO:0006650	glycerophospholipid metabolic process	116	5	3.68	0.30777	1	MSS4,AFT1,GTS1,TCB2,INP53	YDR208W,YGL071W,YGL181W,YNL087W,YOR109W
GO:0044257	cellular protein catabolic process	260	10	8.25	0.31156	1	RAD16,CDC53,TOM1,SCL1,COS6,COS8,UBA1,MNL2,ATG19,UBP2	YBR114W,YDL132W,YDR457W,YGL011C,YGR295C,YHL048W,YKL210W,YLR057W,YOL082W,YOR124C
GO:0015980	energy derivation by oxidation of organic compounds	145	6	4.6	0.31278	1	ALG7,QCR6,HAP1,PAH1,ADH1,CAT5	YBR243C,YFR033C,YLR256W,YMR165C,YOL086C,YOR125C
GO:0006302	double-strand break repair	117	5	3.71	0.31405	1	SCC2,TOR1,NUP120,TOR2,ARP8	YDR180W,YJR066W,YKL057C,YKL203C,YOR141C
GO:0010035	response to inorganic substance	62	3	1.97	0.31452	1	PCA1,IRA2,COT1	YBR295W,YOL081W,YOR316C
GO:0090502	RNA phosphodiester bond hydrolysis, endonucleolytic	62	3	1.97	0.31452	1	UTP20,TOM1,NOP9	YBL004W,YDR457W,YJL010C
GO:0034502	protein localization to chromosome	36	2	1.14	0.31761	1	SCC2,HAP1	YDR180W,YLR256W
GO:0022402	cell cycle process	649	23	20.6	0.31824	1	DCC1,CDC53,RAD61,SCC2,MSS4,TOM1,AFT1,CYS4,RIM101,QDR1,TOR1,BIR1,TOR2,SFI1,ACE2,TUB4,CDC123,NKP2,ZDS2,END3,IPI3,PAP2,CTR9	YCL016C,YDL132W,YDR014W,YDR180W,YDR208W,YDR457W,YGL071W,YGR155W,YHL027W,YIL120W,YJR066W,YJR089W,YKL203C,YLL003W,YLR131C,YLR212C,YLR215C,YLR315W,YML109W,YNL084C,YNL182C,YOL115W,YOL145C
GO:0001402	signal transduction involved in filamentous growth	12	1	0.38	0.32127	1	MSB2	YGR014W
GO:0006122	mitochondrial electron transport, ubiquinol to cytochrome c	12	1	0.38	0.32127	1	QCR6	YFR033C
GO:0006797	polyphosphate metabolic process	12	1	0.38	0.32127	1	PHO84	YML123C
GO:0006829	zinc II ion transport	12	1	0.38	0.32127	1	COT1	YOR316C
GO:0010992	ubiquitin homeostasis	12	1	0.38	0.32127	1	UBP2	YOR124C
GO:0019344	cysteine biosynthetic process	12	1	0.38	0.32127	1	CYS4	YGR155W
GO:0032048	cardiolipin metabolic process	12	1	0.38	0.32127	1	AFT1	YGL071W
GO:0045913	positive regulation of carbohydrate metabolic process	12	1	0.38	0.32127	1	MSS11	YMR164C
GO:0046040	IMP metabolic process	12	1	0.38	0.32127	1	ADE2	YOR128C
GO:0051098	regulation of binding	12	1	0.38	0.32127	1	TOR2	YKL203C
GO:0070301	cellular response to hydrogen peroxide	12	1	0.38	0.32127	1	IRA2	YOL081W
GO:0051301	cell division	293	11	9.3	0.32666	1	CDC53,RIM101,TAO3,BIR1,SFI1,ACE2,CDC123,NKP2,END3,PAP2,RGA1	YDL132W,YHL027W,YIL129C,YJR089W,YLL003W,YLR131C,YLR215C,YLR315W,YNL084C,YOL115W,YOR127W
GO:0009112	nucleobase metabolic process	37	2	1.17	0.32938	1	AAH1,ADE2	YNL141W,YOR128C
GO:0051347	positive regulation of transferase activity	37	2	1.17	0.32938	1	RPP1A,CDC53	YDL081C,YDL132W
GO:0015748	organophosphate ester transport	64	3	2.03	0.33208	1	FLC2,RIM2,SAL1	YAL053W,YBR192W,YNL083W
GO:0071428	rRNA-containing ribonucleoprotein complex export from nucleus	64	3	2.03	0.33208	1	NOP9,NUP120,RPS19A	YJL010C,YKL057C,YOL121C
GO:0005996	monosaccharide metabolic process	92	4	2.92	0.33454	1	GAL3,RGT1,GAL2,ADH1	YDR009W,YKL038W,YLR081W,YOL086C
GO:0030162	regulation of proteolysis	38	2	1.21	0.3411	1	CDC53,UBP2	YDL132W,YOR124C
GO:1901264	carbohydrate derivative transport	38	2	1.21	0.3411	1	SAL1,NRT1	YNL083W,YOR071C
GO:0006734	NADH metabolic process	13	1	0.41	0.34286	1	ADH1	YOL086C
GO:0009085	lysine biosynthetic process	13	1	0.41	0.34286	1	LYS14	YDR034C
GO:0009746	response to hexose	13	1	0.41	0.34286	1	GPR1	YDL035C
GO:0009749	response to glucose	13	1	0.41	0.34286	1	GPR1	YDL035C
GO:0015695	organic cation transport	13	1	0.41	0.34286	1	MEP2	YNL142W
GO:0030011	maintenance of cell polarity	13	1	0.41	0.34286	1	SWH1	YAR042W
GO:0034284	response to monosaccharide	13	1	0.41	0.34286	1	GPR1	YDL035C
GO:0035376	sterol import	13	1	0.41	0.34286	1	AUS1	YOR011W
GO:0045807	positive regulation of endocytosis	13	1	0.41	0.34286	1	TOR2	YKL203C
GO:0046686	response to cadmium ion	13	1	0.41	0.34286	1	PCA1	YBR295W
GO:0051668	localization within membrane	13	1	0.41	0.34286	1	NUP120	YKL057C
GO:1900402	regulation of carbohydrate metabolic process by regulation of transcription from RNA polymerase II promoter	13	1	0.41	0.34286	1	MSS11	YMR164C
GO:1900429	negative regulation of filamentous growth of a population of unicellular organisms	13	1	0.41	0.34286	1	SFL1	YOR140W
GO:1902806	regulation of cell cycle G1/S phase transition	13	1	0.41	0.34286	1	CYS4	YGR155W
GO:2000045	regulation of G1/S transition of mitotic cell cycle	13	1	0.41	0.34286	1	CYS4	YGR155W
GO:0006644	phospholipid metabolic process	151	6	4.79	0.34679	1	MSS4,AFT1,GTS1,PAH1,TCB2,INP53	YDR208W,YGL071W,YGL181W,YMR165C,YNL087W,YOR109W
GO:0016052	carbohydrate catabolic process	94	4	2.98	0.3491	1	IMA1,MAL11,MSS11,IMA2	YGR287C,YGR289C,YMR164C,YOL157C
GO:1901987	regulation of cell cycle phase transition	94	4	2.98	0.3491	1	CDC53,CYS4,BIR1,ZDS2	YDL132W,YGR155W,YJR089W,YML109W
GO:1901990	regulation of mitotic cell cycle phase transition	94	4	2.98	0.3491	1	CDC53,CYS4,BIR1,ZDS2	YDL132W,YGR155W,YJR089W,YML109W
GO:0006360	transcription from RNA polymerase I promoter	66	3	2.1	0.34962	1	TOR1,CTR9,MOT1	YJR066W,YOL145C,YPL082C
GO:0065008	regulation of biological quality	509	18	16.16	0.35047	1	FLC2,PCA1,GPR1,VCX1,GAL3,TOM1,PMR1,HAL5,NFU1,FRE2,FRE1,NAM9,MAM3,FRE7,UBP2,PDR5,COT1,GLR1	YAL053W,YBR295W,YDL035C,YDL128W,YDR009W,YDR457W,YGL167C,YJL165C,YKL040C,YKL220C,YLR214W,YNL137C,YOL060C,YOL152W,YOR124C,YOR153W,YOR316C,YPL091W
GO:0006487	protein N-linked glycosylation	39	2	1.24	0.35275	1	ALG7,MNN4	YBR243C,YKL201C
GO:0010647	positive regulation of cell communication	39	2	1.24	0.35275	1	TOR2,ETT1	YKL203C,YOR051C
GO:1901135	carbohydrate derivative metabolic process	360	13	11.43	0.35579	1	IRA1,ALG7,PSA1,QCR6,BCY1,CYR1,MNN4,MNL2,IRA2,ADH1,RAS1,CAT5,ADE2	YBR140C,YBR243C,YDL055C,YFR033C,YIL033C,YJL005W,YKL201C,YLR057W,YOL081W,YOL086C,YOR101W,YOR125C,YOR128C
GO:0051049	regulation of transport	95	4	3.02	0.35639	1	AFT1,RHO3,RGT1,TOR2	YGL071W,YIL118W,YKL038W,YKL203C
GO:0006631	fatty acid metabolic process	67	3	2.13	0.35838	1	EHD3,PAH1,PIP2	YDR036C,YMR165C,YOR363C
GO:0000070	mitotic sister chromatid segregation	124	5	3.94	0.3584	1	DCC1,RAD61,SCC2,AFT1,BIR1	YCL016C,YDR014W,YDR180W,YGL071W,YJR089W
GO:0008033	tRNA processing	124	5	3.94	0.3584	1	LSM6,KTI12,KRE33,PAP2,RTT10	YDR378C,YKL110C,YNL132W,YOL115W,YPL183C
GO:0000056	ribosomal small subunit export from nucleus	14	1	0.44	0.36377	1	NOP9	YJL010C
GO:0000413	protein peptidyl-prolyl isomerization	14	1	0.44	0.36377	1	CPR6	YLR216C
GO:0006282	regulation of DNA repair	14	1	0.44	0.36377	1	CTR9	YOL145C
GO:0006521	regulation of cellular amino acid metabolic process	14	1	0.44	0.36377	1	LYS14	YDR034C
GO:0006553	lysine metabolic process	14	1	0.44	0.36377	1	LYS14	YDR034C
GO:0006743	ubiquinone metabolic process	14	1	0.44	0.36377	1	CAT5	YOR125C
GO:0006744	ubiquinone biosynthetic process	14	1	0.44	0.36377	1	CAT5	YOR125C
GO:0006857	oligopeptide transport	14	1	0.44	0.36377	1	PTR2	YKR093W
GO:0006882	cellular zinc ion homeostasis	14	1	0.44	0.36377	1	COT1	YOR316C
GO:0007155	cell adhesion	14	1	0.44	0.36377	1	FLO11	YIR019C
GO:0009743	response to carbohydrate	14	1	0.44	0.36377	1	GPR1	YDL035C
GO:0010499	proteasomal ubiquitin-independent protein catabolic process	14	1	0.44	0.36377	1	SCL1	YGL011C
GO:0022610	biological adhesion	14	1	0.44	0.36377	1	FLO11	YIR019C
GO:0030046	parallel actin filament bundle assembly	14	1	0.44	0.36377	1	RHO3	YIL118W
GO:0032881	regulation of polysaccharide metabolic process	14	1	0.44	0.36377	1	MSS11	YMR164C
GO:0033238	regulation of cellular amine metabolic process	14	1	0.44	0.36377	1	LYS14	YDR034C
GO:0034398	telomere tethering at nuclear periphery	14	1	0.44	0.36377	1	NUP120	YKL057C
GO:0042181	ketone biosynthetic process	14	1	0.44	0.36377	1	CAT5	YOR125C
GO:0045898	regulation of RNA polymerase II transcriptional preinitiation complex assembly	14	1	0.44	0.36377	1	MOT1	YPL082C
GO:0045926	negative regulation of growth	14	1	0.44	0.36377	1	SFL1	YOR140W
GO:0055069	zinc ion homeostasis	14	1	0.44	0.36377	1	COT1	YOR316C
GO:0060258	negative regulation of filamentous growth	14	1	0.44	0.36377	1	SFL1	YOR140W
GO:0070649	formin-nucleated actin cable assembly	14	1	0.44	0.36377	1	RHO3	YIL118W
GO:0071034	CUT catabolic process	14	1	0.44	0.36377	1	PAP2	YOL115W
GO:0071043	CUT metabolic process	14	1	0.44	0.36377	1	PAP2	YOL115W
GO:0098661	inorganic anion transmembrane transport	14	1	0.44	0.36377	1	PHO89	YBR296C
GO:0099022	vesicle tethering	14	1	0.44	0.36377	1	SEC3	YER008C
GO:1901661	quinone metabolic process	14	1	0.44	0.36377	1	CAT5	YOR125C
GO:1901663	quinone biosynthetic process	14	1	0.44	0.36377	1	CAT5	YOR125C
GO:0007052	mitotic spindle organization	40	2	1.27	0.36433	1	BIR1,TUB4	YJR089W,YLR212C
GO:1900428	regulation of filamentous growth of a population of unicellular organisms	40	2	1.27	0.36433	1	MSS11,SFL1	YMR164C,YOR140W
GO:1902850	microtubule cytoskeleton organization involved in mitosis	40	2	1.27	0.36433	1	BIR1,TUB4	YJR089W,YLR212C
GO:0000027	ribosomal large subunit assembly	41	2	1.3	0.37583	1	DRS1,IPI3	YLL008W,YNL182C
GO:0001934	positive regulation of protein phosphorylation	41	2	1.3	0.37583	1	RPP1A,CTR9	YDL081C,YOL145C
GO:0009127	purine nucleoside monophosphate biosynthetic process	41	2	1.3	0.37583	1	AAH1,ADE2	YNL141W,YOR128C
GO:0009168	purine ribonucleoside monophosphate biosynthetic process	41	2	1.3	0.37583	1	AAH1,ADE2	YNL141W,YOR128C
GO:0031124	mRNA 3'-end processing	41	2	1.3	0.37583	1	THO2,CTR9	YNL139C,YOL145C
GO:0009987	cellular process	4621	149	146.71	0.37875	1	FLC2,SWH1,UTP20,PDR3,RAD16,IRA1,RIM2,ALG7,PCA1,DCC1,GPR1,PSA1,USO1,RPP1A,VCX1,CDC53,RPL41B,HO,GAL3,RAD61,LYS14,EHD3,ENA1,RSM10,SCC2,MSS4,PEX5,TRS23,EXG2,LSM6,TOM1,YEF1,SEC3,YFH7,QCR6,PHO4,SCL1,PDR1,AFT1,PMR1,GTS1,KEX1,MSB2,MSP1,ROM1,GTO1,CYS4,PHO81,IMA1,MAL11,COS6,RIM101,ECM34,COS8,ERG11,ERC1,BCY1,HIS5,RHO3,RPI1,QDR1,MET18,TAO3,ASG1,YIL165C,CSS1,FLO11,CYR1,CCT8,NOP9,HAL5,TOR1,YAE1,BIR1,RGT1,NFU1,…	YAL053W,YAR042W,YBL004W,YBL005W,YBR114W,YBR140C,YBR192W,YBR243C,YBR295W,YCL016C,YDL035C,YDL055C,YDL058W,YDL081C,YDL128W,YDL132W,YDL133C-A,YDL227C,YDR009W,YDR014W,YDR034C,YDR036C,YDR040C,YDR041W,YDR180W,YDR208W,YDR244W,YDR246W,YDR261C,YDR378C,YDR457W,YEL041W,YER008C,YFR007W,YFR033C,YFR034C,YGL011C,YGL013C,YGL071W,YGL167C,YGL181W,YGL203C,YGR014W,YGR028W,YGR070W,YGR154C,YGR155W,YGR233C,YGR287C,YGR28…
GO:0001678	cellular glucose homeostasis	15	1	0.48	0.38402	1	GPR1	YDL035C
GO:0006067	ethanol metabolic process	15	1	0.48	0.38402	1	ADH1	YOL086C
GO:0006113	fermentation	15	1	0.48	0.38402	1	ADH1	YOL086C
GO:0033500	carbohydrate homeostasis	15	1	0.48	0.38402	1	GPR1	YDL035C
GO:0034475	U4 snRNA 3'-end processing	15	1	0.48	0.38402	1	PAP2	YOL115W
GO:0042593	glucose homeostasis	15	1	0.48	0.38402	1	GPR1	YDL035C
GO:0070786	positive regulation of growth of unicellular organism as a thread of attached cells	15	1	0.48	0.38402	1	MSS11	YMR164C
GO:0071042	nuclear polyadenylation-dependent mRNA catabolic process	15	1	0.48	0.38402	1	PAP2	YOL115W
GO:0071047	polyadenylation-dependent mRNA catabolic process	15	1	0.48	0.38402	1	PAP2	YOL115W
GO:0071051	polyadenylation-dependent snoRNA 3'-end processing	15	1	0.48	0.38402	1	PAP2	YOL115W
GO:0071071	regulation of phospholipid biosynthetic process	15	1	0.48	0.38402	1	GTS1	YGL181W
GO:0097305	response to alcohol	15	1	0.48	0.38402	1	PDR5	YOR153W
GO:1903322	positive regulation of protein modification by small protein conjugation or removal	15	1	0.48	0.38402	1	CDC53	YDL132W
GO:0000724	double-strand break repair via homologous recombination	70	3	2.22	0.38454	1	SCC2,TOR1,TOR2	YDR180W,YJR066W,YKL203C
GO:0032446	protein modification by small protein conjugation	158	6	5.02	0.38688	1	RAD16,CDC53,TOM1,UBA1,CTR9,UBA3	YBR114W,YDL132W,YDR457W,YKL210W,YOL145C,YPR066W
GO:0010570	regulation of filamentous growth	42	2	1.33	0.38725	1	MSS11,SFL1	YMR164C,YOR140W
GO:0033048	negative regulation of mitotic sister chromatid segregation	42	2	1.33	0.38725	1	RAD61,BIR1	YDR014W,YJR089W
GO:0034599	cellular response to oxidative stress	100	4	3.17	0.39277	1	ECM5,IRA2,YRR1,GLR1	YMR176W,YOL081W,YOR162C,YPL091W
GO:0009161	ribonucleoside monophosphate metabolic process	130	5	4.13	0.39662	1	QCR6,AAH1,ADH1,CAT5,ADE2	YFR033C,YNL141W,YOL086C,YOR125C,YOR128C
GO:0032511	late endosome to vacuole transport via multivesicular body sorting pathway	43	2	1.37	0.39857	1	COS6,COS8	YGR295C,YHL048W
GO:0033046	negative regulation of sister chromatid segregation	43	2	1.37	0.39857	1	RAD61,BIR1	YDR014W,YJR089W
GO:0043628	ncRNA 3'-end processing	43	2	1.37	0.39857	1	PAP2,CTR9	YOL115W,YOL145C
GO:0044804	nucleophagy	43	2	1.37	0.39857	1	SWH1,ATG39	YAR042W,YLR312C
GO:0051985	negative regulation of chromosome segregation	43	2	1.37	0.39857	1	RAD61,BIR1	YDR014W,YJR089W
GO:0070647	protein modification by small protein conjugation or removal	190	7	6.03	0.39894	1	RAD16,CDC53,TOM1,UBA1,CTR9,UBP2,UBA3	YBR114W,YDL132W,YDR457W,YKL210W,YOL145C,YOR124C,YPR066W
GO:0009408	response to heat	72	3	2.29	0.40186	1	NUP120,PSR1,WHI2	YKL057C,YLL010C,YOR043W
GO:0031401	positive regulation of protein modification process	72	3	2.29	0.40186	1	RPP1A,CDC53,CTR9	YDL081C,YDL132W,YOL145C
GO:0000022	mitotic spindle elongation	16	1	0.51	0.40363	1	BIR1	YJR089W
GO:0000147	actin cortical patch assembly	16	1	0.51	0.40363	1	END3	YNL084C
GO:0000917	barrier septum assembly	16	1	0.51	0.40363	1	RIM101	YHL027W
GO:0000973	posttranscriptional tethering of RNA polymerase II gene DNA at nuclear periphery	16	1	0.51	0.40363	1	NUP120	YKL057C
GO:0006813	potassium ion transport	16	1	0.51	0.40363	1	ENA1	YDR040C
GO:0007121	bipolar cellular bud site selection	16	1	0.51	0.40363	1	END3	YNL084C
GO:0016078	tRNA catabolic process	16	1	0.51	0.40363	1	PAP2	YOL115W
GO:0018208	peptidyl-proline modification	16	1	0.51	0.40363	1	CPR6	YLR216C
GO:0030474	spindle pole body duplication	16	1	0.51	0.40363	1	SFI1	YLL003W
GO:0034308	primary alcohol metabolic process	16	1	0.51	0.40363	1	ADH1	YOL086C
GO:0034397	telomere localization	16	1	0.51	0.40363	1	NUP120	YKL057C
GO:0042542	response to hydrogen peroxide	16	1	0.51	0.40363	1	IRA2	YOL081W
GO:0043470	regulation of carbohydrate catabolic process	16	1	0.51	0.40363	1	MSS11	YMR164C
GO:0051225	spindle assembly	16	1	0.51	0.40363	1	SFI1	YLL003W
GO:0051231	spindle elongation	16	1	0.51	0.40363	1	BIR1	YJR089W
GO:0051302	regulation of cell division	16	1	0.51	0.40363	1	ACE2	YLR131C
GO:0071038	nuclear polyadenylation-dependent tRNA catabolic process	16	1	0.51	0.40363	1	PAP2	YOL115W
GO:0090529	cell septum assembly	16	1	0.51	0.40363	1	RIM101	YHL027W
GO:1902410	mitotic cytokinetic process	16	1	0.51	0.40363	1	RIM101	YHL027W
GO:0022411	cellular component disassembly	132	5	4.19	0.40933	1	YIL165C,LMO1,ATG39,WHI2,ETT1	YIL165C,YLL007C,YLR312C,YOR043W,YOR051C
GO:0000902	cell morphogenesis	44	2	1.4	0.4098	1	TAO3,SRV2	YIL129C,YNL138W
GO:0006915	apoptotic process	44	2	1.4	0.4098	1	KEX1,BIR1	YGL203C,YJR089W
GO:0043144	snoRNA processing	44	2	1.4	0.4098	1	PAP2,CTR9	YOL115W,YOL145C
GO:1903825	organic acid transmembrane transport	44	2	1.4	0.4098	1	GNP1,MUP3	YDR508C,YHL036W
GO:1905039	carboxylic acid transmembrane transport	44	2	1.4	0.4098	1	GNP1,MUP3	YDR508C,YHL036W
GO:0010927	cellular component assembly involved in morphogenesis	73	3	2.32	0.41046	1	MSS4,QDR1,END3	YDR208W,YIL120W,YNL084C
GO:0031123	RNA 3'-end processing	73	3	2.32	0.41046	1	THO2,PAP2,CTR9	YNL139C,YOL115W,YOL145C
GO:0009123	nucleoside monophosphate metabolic process	133	5	4.22	0.41567	1	QCR6,AAH1,ADH1,CAT5,ADE2	YFR033C,YNL141W,YOL086C,YOR125C,YOR128C
GO:0016567	protein ubiquitination	133	5	4.22	0.41567	1	RAD16,CDC53,TOM1,UBA1,CTR9	YBR114W,YDL132W,YDR457W,YKL210W,YOL145C
GO:0032509	endosome transport via multivesicular body sorting pathway	45	2	1.43	0.42092	1	COS6,COS8	YGR295C,YHL048W
GO:0042327	positive regulation of phosphorylation	45	2	1.43	0.42092	1	RPP1A,CTR9	YDL081C,YOL145C
GO:0090174	organelle membrane fusion	45	2	1.43	0.42092	1	USO1,SEY1	YDL058W,YOR165W
GO:0006904	vesicle docking involved in exocytosis	17	1	0.54	0.42261	1	SEC3	YER008C
GO:0016574	histone ubiquitination	17	1	0.54	0.42261	1	CTR9	YOL145C
GO:0019359	nicotinamide nucleotide biosynthetic process	17	1	0.54	0.42261	1	YEF1	YEL041W
GO:0043269	regulation of ion transport	17	1	0.54	0.42261	1	AFT1	YGL071W
GO:0046471	phosphatidylglycerol metabolic process	17	1	0.54	0.42261	1	AFT1	YGL071W
GO:0032505	reproduction of a single-celled organism	195	7	6.19	0.42526	1	HO,MSS4,RIM101,QDR1,TAO3,END3,RGA1	YDL227C,YDR208W,YHL027W,YIL120W,YIL129C,YNL084C,YOR127W
GO:0007569	cell aging	75	3	2.38	0.42756	1	GPR1,ZDS2,RAS1	YDL035C,YML109W,YOR101W
GO:0009060	aerobic respiration	75	3	2.38	0.42756	1	ALG7,QCR6,PAH1	YBR243C,YFR033C,YMR165C
GO:0042255	ribosome assembly	75	3	2.38	0.42756	1	DRS1,IPI3,RPS19A	YLL008W,YNL182C,YOL121C
GO:0048869	cellular developmental process	318	11	10.1	0.42937	1	GPR1,HO,MSS4,RIM101,QDR1,TAO3,ZDS2,END3,SRV2,TGL5,RAS1	YDL035C,YDL227C,YDR208W,YHL027W,YIL120W,YIL129C,YML109W,YNL084C,YNL138W,YOR081C,YOR101W
GO:0008219	cell death	46	2	1.46	0.43194	1	KEX1,BIR1	YGL203C,YJR089W
GO:0012501	programmed cell death	46	2	1.46	0.43194	1	KEX1,BIR1	YGL203C,YJR089W
GO:0007568	aging	76	3	2.41	0.43604	1	GPR1,ZDS2,RAS1	YDL035C,YML109W,YOR101W
GO:0006407	rRNA export from nucleus	18	1	0.57	0.441	1	RPS19A	YOL121C
GO:0007020	microtubule nucleation	18	1	0.57	0.441	1	TUB4	YLR212C
GO:0019363	pyridine nucleotide biosynthetic process	18	1	0.57	0.441	1	YEF1	YEL041W
GO:0030100	regulation of endocytosis	18	1	0.57	0.441	1	TOR2	YKL203C
GO:0031058	positive regulation of histone modification	18	1	0.57	0.441	1	CTR9	YOL145C
GO:0045910	negative regulation of DNA recombination	18	1	0.57	0.441	1	PAP2	YOL115W
GO:0051029	rRNA transport	18	1	0.57	0.441	1	RPS19A	YOL121C
GO:0051568	histone H3-K4 methylation	18	1	0.57	0.441	1	CTR9	YOL145C
GO:2001020	regulation of response to DNA damage stimulus	18	1	0.57	0.441	1	CTR9	YOL145C
GO:0001302	replicative cell aging	47	2	1.49	0.44285	1	GPR1,RAS1	YDL035C,YOR101W
GO:0016485	protein processing	47	2	1.49	0.44285	1	HO,ATG19	YDL227C,YOL082W
GO:0045839	negative regulation of mitotic nuclear division	47	2	1.49	0.44285	1	RAD61,BIR1	YDR014W,YJR089W
GO:0051052	regulation of DNA metabolic process	107	4	3.4	0.44315	1	DCC1,IPI3,PAP2,CTR9	YCL016C,YNL182C,YOL115W,YOL145C
GO:0000725	recombinational repair	77	3	2.44	0.44448	1	SCC2,TOR1,TOR2	YDR180W,YJR066W,YKL203C
GO:0044801	single-organism membrane fusion	77	3	2.44	0.44448	1	USO1,PAH1,SEY1	YDL058W,YMR165C,YOR165W
GO:0007049	cell cycle	756	25	24	0.44586	1	DCC1,PSA1,CDC53,RAD61,SCC2,MSS4,TOM1,AFT1,CYS4,RIM101,QDR1,TOR1,BIR1,TOR2,SFI1,ACE2,TUB4,CDC123,NKP2,ZDS2,END3,IPI3,PAP2,CTR9,WHI2	YCL016C,YDL055C,YDL132W,YDR014W,YDR180W,YDR208W,YDR457W,YGL071W,YGR155W,YHL027W,YIL120W,YJR066W,YJR089W,YKL203C,YLL003W,YLR131C,YLR212C,YLR215C,YLR315W,YML109W,YNL084C,YNL182C,YOL115W,YOL145C,YOR043W
GO:0016310	phosphorylation	353	12	11.21	0.44649	1	RPP1A,GAL3,MSS4,YEF1,YFH7,QCR6,BCY1,HAL5,TOR1,TOR2,CTR9,CAT5	YDL081C,YDR009W,YDR208W,YEL041W,YFR007W,YFR033C,YIL033C,YJL165C,YJR066W,YKL203C,YOL145C,YOR125C
GO:0048519	negative regulation of biological process	664	22	21.08	0.44963	1	IRA1,RAD61,AFT1,GTS1,RIM101,BCY1,TOR1,BIR1,RGT1,NUP120,TOR2,CDC123,HAP1,ZDS2,MOT3,AVO1,IRA2,PAP2,CTR9,SFL1,MOT1,MED1	YBR140C,YDR014W,YGL071W,YGL181W,YHL027W,YIL033C,YJR066W,YJR089W,YKL038W,YKL057C,YKL203C,YLR215C,YLR256W,YML109W,YMR070W,YOL078W,YOL081W,YOL115W,YOL145C,YOR140W,YPL082C,YPR070W
GO:0000226	microtubule cytoskeleton organization	108	4	3.43	0.45026	1	MSP1,BIR1,SFI1,TUB4	YGR028W,YJR089W,YLL003W,YLR212C
GO:0006979	response to oxidative stress	108	4	3.43	0.45026	1	ECM5,IRA2,YRR1,GLR1	YMR176W,YOL081W,YOR162C,YPL091W
GO:0000469	cleavage involved in rRNA processing	78	3	2.48	0.45287	1	UTP20,TOM1,NOP9	YBL004W,YDR457W,YJL010C
GO:0030437	ascospore formation	109	4	3.46	0.45733	1	MSS4,RIM101,QDR1,END3	YDR208W,YHL027W,YIL120W,YNL084C
GO:0048468	cell development	109	4	3.46	0.45733	1	MSS4,RIM101,QDR1,END3	YDR208W,YHL027W,YIL120W,YNL084C
GO:0000272	polysaccharide catabolic process	19	1	0.6	0.4588	1	MSS11	YMR164C
GO:0015696	ammonium transport	19	1	0.6	0.4588	1	MEP2	YNL142W
GO:0044396	actin cortical patch organization	19	1	0.6	0.4588	1	END3	YNL084C
GO:0051181	cofactor transport	19	1	0.6	0.4588	1	FLC2	YAL053W
GO:0071035	nuclear polyadenylation-dependent rRNA catabolic process	19	1	0.6	0.4588	1	PAP2	YOL115W
GO:0071472	cellular response to salt stress	19	1	0.6	0.4588	1	PSR1	YLL010C
GO:1901615	organic hydroxy compound metabolic process	140	5	4.44	0.45972	1	ALG7,ERG11,MOT3,ADH1,ERG10	YBR243C,YHR007C,YMR070W,YOL086C,YPL028W
GO:0009892	negative regulation of metabolic process	512	17	16.26	0.46074	1	IRA1,AFT1,GTS1,RIM101,TOR1,RGT1,NUP120,TOR2,HAP1,ZDS2,MOT3,IRA2,PAP2,CTR9,SFL1,MOT1,MED1	YBR140C,YGL071W,YGL181W,YHL027W,YJR066W,YKL038W,YKL057C,YKL203C,YLR256W,YML109W,YMR070W,YOL081W,YOL115W,YOL145C,YOR140W,YPL082C,YPR070W
GO:0006400	tRNA modification	79	3	2.51	0.46121	1	KTI12,KRE33,PAP2	YKL110C,YNL132W,YOL115W
GO:0044724	single-organism carbohydrate catabolic process	79	3	2.51	0.46121	1	IMA1,MAL11,IMA2	YGR287C,YGR289C,YOL157C
GO:0000054	ribosomal subunit export from nucleus	49	2	1.56	0.46431	1	NOP9,NUP120	YJL010C,YKL057C
GO:0033753	establishment of ribosome localization	49	2	1.56	0.46431	1	NOP9,NUP120	YJL010C,YKL057C
GO:0090068	positive regulation of cell cycle process	49	2	1.56	0.46431	1	CYS4,ZDS2	YGR155W,YML109W
GO:0055114	oxidation-reduction process	420	14	13.33	0.46548	1	ALG7,EHD3,QCR6,GTO1,ERG11,FRE2,FRE1,HAP1,PAH1,ADH1,FRE7,CAT5,PIP2,GLR1	YBR243C,YDR036C,YFR033C,YGR154C,YHR007C,YKL220C,YLR214W,YLR256W,YMR165C,YOL086C,YOL152W,YOR125C,YOR363C,YPL091W
GO:0000819	sister chromatid segregation	141	5	4.48	0.46594	1	DCC1,RAD61,SCC2,AFT1,BIR1	YCL016C,YDR014W,YDR180W,YGL071W,YJR089W
GO:0000280	nuclear division	358	12	11.37	0.46629	1	DCC1,RAD61,SCC2,TOM1,AFT1,RIM101,TOR1,BIR1,SFI1,TUB4,NKP2,PAP2	YCL016C,YDR014W,YDR180W,YDR457W,YGL071W,YHL027W,YJR066W,YJR089W,YLL003W,YLR212C,YLR315W,YOL115W
GO:0061025	membrane fusion	80	3	2.54	0.46949	1	USO1,PAH1,SEY1	YDL058W,YMR165C,YOR165W
GO:0016192	vesicle-mediated transport	390	13	12.38	0.4697	1	SWH1,USO1,TRS23,SEC3,PMR1,GTS1,RHO3,APL1,TOR2,END3,WHI2,INP53,RTT10	YAR042W,YDL058W,YDR246W,YER008C,YGL167C,YGL181W,YIL118W,YJR005W,YKL203C,YNL084C,YOR043W,YOR109W,YPL183C
GO:0030476	ascospore wall assembly	50	2	1.59	0.47486	1	QDR1,END3	YIL120W,YNL084C
GO:0033750	ribosome localization	50	2	1.59	0.47486	1	NOP9,NUP120	YJL010C,YKL057C
GO:0042244	spore wall assembly	50	2	1.59	0.47486	1	QDR1,END3	YIL120W,YNL084C
GO:0060627	regulation of vesicle-mediated transport	50	2	1.59	0.47486	1	RHO3,TOR2	YIL118W,YKL203C
GO:0070590	spore wall biogenesis	50	2	1.59	0.47486	1	QDR1,END3	YIL120W,YNL084C
GO:0070591	ascospore wall biogenesis	50	2	1.59	0.47486	1	QDR1,END3	YIL120W,YNL084C
[truncated: 2,441 more rows]

## Sheet: GO_Molecular_Function
GO.ID	Term	Annotated	Significant	Expected	P-value	fdr	Genes	GenesSystematic
[truncated: 1,120 more rows]

## Sheet: GO_Cellular_Compartment
GO.ID	Term	Annotated	Significant	Expected	P-value	fdr	Genes	GenesSystematic
[truncated: 826 more rows]
